# Supplementary material for: High-coverage nanopore sequencing of samples from the 1000 Genomes Project to build a comprehensive catalog of human genetic variation
Source: PubMed Central journal article supplement — Genome Res. 2024 Nov;34(11):2061–73. doi: 10.1101/gr.279273.124 (PMC11610458; doi:10.1101/gr.279273.124), 2024-11
Supplement: Supplemental_File_S2.pdf [file Supplemental_File_S2.pdf]

**File S2:** Assembly breakpoints observed in 20 or more samples from either the Flye or Shasta-Hapdup assemblies.

| <b>OMIM Gene</b> | <b>Number of samples with incomplete Flye assemblies</b> | <b>Number of samples with incomplete Shasta-Hapdup assemblies</b> | <b>within/near a segmental duplication</b> |
|------------------|----------------------------------------------------------|-------------------------------------------------------------------|--------------------------------------------|
| A2ML1            | 0                                                        | 0                                                                 | no                                         |
| A4GALT           | 0                                                        | 1                                                                 | no                                         |
| AAAS             | 0                                                        | 0                                                                 | no                                         |
| AAGAB            | 0                                                        | 0                                                                 | no                                         |
| AARS1            | 0                                                        | 1                                                                 | yes                                        |
| AARS2            | 0                                                        | 0                                                                 | no                                         |
| AASS             | 0                                                        | 0                                                                 | no                                         |
| ABAT             | 0                                                        | 0                                                                 | no                                         |
| ABCA1            | 0                                                        | 0                                                                 | no                                         |
| ABCA12           | 3                                                        | 1                                                                 | no                                         |
| ABCA2            | 0                                                        | 0                                                                 | no                                         |
| ABCA3            | 0                                                        | 0                                                                 | yes                                        |
| ABCA4            | 0                                                        | 1                                                                 | no                                         |
| ABCA5            | 0                                                        | 2                                                                 | no                                         |
| ABCA7            | 0                                                        | 1                                                                 | no                                         |
| ABCB1            | 1                                                        | 1                                                                 | yes                                        |
| ABCB11           | 0                                                        | 0                                                                 | no                                         |
| ABCB4            | 1                                                        | 0                                                                 | no                                         |
| ABCB6            | 0                                                        | 0                                                                 | no                                         |
| ABCC1            | 0                                                        | 0                                                                 | no                                         |
| ABCC11           | 0                                                        | 0                                                                 | no                                         |
| ABCC2            | 0                                                        | 1                                                                 | yes                                        |
| ABCC6            | 18                                                       | 100                                                               | yes                                        |
| ABCC8            | 0                                                        | 0                                                                 | yes                                        |
| ABCC9            | 1                                                        | 0                                                                 | yes                                        |
| ABCD3            | 0                                                        | 0                                                                 | no                                         |
| ABCD4            | 0                                                        | 0                                                                 | no                                         |
| ABCG2            | 0                                                        | 1                                                                 | no                                         |
| ABCG5            | 0                                                        | 0                                                                 | no                                         |
| ABCG8            | 0                                                        | 0                                                                 | no                                         |
| ABHD12           | 0                                                        | 0                                                                 | no                                         |
| ABHD16A          | 0                                                        | 1                                                                 | no                                         |
| ABHD5            | 0                                                        | 1                                                                 | no                                         |
| ABL1             | 0                                                        | 2                                                                 | no                                         |
| ABO              | 0                                                        | 1                                                                 | yes                                        |

|        |   |   |     |
|--------|---|---|-----|
| ACACA  | 0 | 2 | yes |
| ACAD8  | 0 | 4 | yes |
| ACAD9  | 0 | 0 | no  |
| ACADM  | 0 | 0 | yes |
| ACADS  | 0 | 0 | no  |
| ACADSB | 0 | 0 | no  |
| ACADVL | 0 | 0 | no  |
| ACAN   | 0 | 0 | no  |
| ACAT1  | 0 | 1 | no  |
| ACAT2  | 0 | 0 | no  |
| ACBD5  | 1 | 0 | yes |
| ACD    | 0 | 0 | no  |
| ACE    | 0 | 0 | no  |
| ACER3  | 1 | 1 | no  |
| ACHE   | 0 | 1 | no  |
| ACKR1  | 0 | 0 | no  |
| ACKR3  | 0 | 0 | no  |
| ACO2   | 0 | 0 | no  |
| ACOX1  | 0 | 0 | no  |
| ACOX2  | 0 | 0 | no  |
| ACP2   | 0 | 0 | no  |
| ACP4   | 0 | 1 | no  |
| ACP5   | 0 | 0 | no  |
| ACR    | 2 | 1 | yes |
| ACSF3  | 0 | 0 | no  |
| ACSL5  | 0 | 0 | no  |
| ACSL6  | 0 | 0 | no  |
| ACSM3  | 0 | 0 | yes |
| ACTA1  | 0 | 0 | no  |
| ACTA2  | 0 | 0 | no  |
| ACTB   | 0 | 0 | yes |
| ACTC1  | 0 | 0 | no  |
| ACTG1  | 0 | 0 | yes |
| ACTG2  | 0 | 0 | no  |
| ACTL6B | 0 | 0 | no  |
| ACTL9  | 0 | 0 | no  |
| ACTN1  | 0 | 0 | yes |
| ACTN2  | 0 | 0 | no  |
| ACTN3  | 0 | 1 | no  |
| ACTN4  | 0 | 0 | yes |
| ACVR1  | 0 | 1 | no  |

|          |    |   |     |
|----------|----|---|-----|
| ACVR1B   | 0  | 0 | no  |
| ACVR2B   | 0  | 1 | no  |
| ACVRL1   | 0  | 0 | no  |
| ACY1     | 0  | 0 | no  |
| ADA      | 0  | 0 | no  |
| ADA2     | 0  | 0 | yes |
| ADAM10   | 0  | 0 | yes |
| ADAM17   | 0  | 0 | no  |
| ADAM22   | 0  | 1 | no  |
| ADAM9    | 0  | 0 | no  |
| ADAMTS10 | 0  | 0 | no  |
| ADAMTS13 | 0  | 1 | no  |
| ADAMTS17 | 0  | 0 | no  |
| ADAMTS18 | 0  | 1 | no  |
| ADAMTS19 | 2  | 1 | no  |
| ADAMTS2  | 0  | 0 | no  |
| ADAMTS3  | 1  | 0 | yes |
| ADAMTSL2 | 0  | 1 | no  |
| ADAMTSL4 | 0  | 0 | no  |
| ADAR     | 0  | 0 | no  |
| ADARB1   | 0  | 1 | no  |
| ADAT3    | 0  | 0 | no  |
| ADCY1    | 0  | 1 | yes |
| ADCY10   | 0  | 0 | no  |
| ADCY3    | 0  | 0 | no  |
| ADCY5    | 0  | 0 | no  |
| ADCY6    | 0  | 0 | no  |
| ADD1     | 0  | 0 | no  |
| ADD3     | 0  | 0 | no  |
| ADGRE2   | 0  | 0 | yes |
| ADGRG1   | 0  | 0 | no  |
| ADGRG6   | 0  | 1 | no  |
| ADGRL1   | 14 | 0 | yes |
| ADGRV1   | 2  | 2 | no  |
| ADH1B    | 0  | 0 | no  |
| ADH1C    | 0  | 0 | no  |
| ADH5     | 0  | 0 | yes |
| ADIPOQ   | 0  | 0 | yes |
| ADK      | 0  | 1 | no  |
| ADNP     | 0  | 0 | no  |
| ADPRS    | 0  | 0 | no  |

|         |    |    |     |
|---------|----|----|-----|
| ADRA2C  | 0  | 0  | no  |
| ADRB1   | 0  | 0  | no  |
| ADRB2   | 0  | 0  | no  |
| ADRB3   | 0  | 0  | no  |
| ADSL    | 0  | 1  | no  |
| ADSS1   | 0  | 2  | no  |
| AEBP1   | 0  | 0  | no  |
| AFF3    | 0  | 62 | yes |
| AFF4    | 0  | 1  | no  |
| AFG2A   | 0  | 0  | yes |
| AFG2B   | 0  | 0  | no  |
| AFG3L2  | 0  | 1  | yes |
| AFP     | 0  | 0  | no  |
| AGA     | 0  | 0  | no  |
| AGBL1   | 0  | 1  | yes |
| AGBL5   | 0  | 0  | no  |
| AGK     | 0  | 0  | yes |
| AGL     | 0  | 0  | no  |
| AGO1    | 0  | 0  | no  |
| AGO2    | 0  | 1  | no  |
| AGPAT2  | 0  | 0  | no  |
| AGPS    | 0  | 0  | yes |
| AGR2    | 0  | 0  | no  |
| AGRN    | 14 | 19 | no  |
| AGRP    | 0  | 0  | no  |
| AGT     | 0  | 0  | no  |
| AGTPBP1 | 10 | 16 | yes |
| AGTR1   | 0  | 0  | no  |
| AGXT    | 0  | 0  | no  |
| AGXT2   | 1  | 0  | no  |
| AHCY    | 0  | 0  | yes |
| AHDC1   | 0  | 1  | no  |
| AHI1    | 1  | 1  | no  |
| AHR     | 0  | 0  | no  |
| AHSG    | 0  | 0  | no  |
| AICDA   | 0  | 0  | no  |
| AIMP1   | 1  | 0  | no  |
| AIMP2   | 0  | 0  | yes |
| AIP     | 0  | 1  | no  |
| AIPL1   | 0  | 0  | no  |
| AIRE    | 1  | 0  | no  |

|          |   |   |     |
|----------|---|---|-----|
| AK1      | 0 | 0 | no  |
| AK2      | 0 | 0 | no  |
| AK7      | 0 | 0 | no  |
| AKAP3    | 0 | 0 | yes |
| AKAP9    | 0 | 0 | yes |
| AKR1C2   | 2 | 0 | yes |
| AKR1C4   | 0 | 0 | no  |
| AKR1D1   | 0 | 0 | no  |
| AKT1     | 0 | 2 | no  |
| AKT2     | 0 | 0 | no  |
| AKT3     | 0 | 1 | no  |
| ALAD     | 0 | 0 | yes |
| ALB      | 0 | 0 | no  |
| ALDH18A1 | 0 | 0 | no  |
| ALDH1A2  | 0 | 0 | no  |
| ALDH1A3  | 0 | 0 | no  |
| ALDH2    | 0 | 0 | no  |
| ALDH3A2  | 0 | 5 | no  |
| ALDH4A1  | 0 | 0 | no  |
| ALDH5A1  | 0 | 0 | no  |
| ALDH6A1  | 0 | 0 | no  |
| ALDH7A1  | 0 | 0 | no  |
| ALDOA    | 0 | 1 | no  |
| ALDOB    | 0 | 1 | no  |
| ALG1     | 0 | 0 | yes |
| ALG10B   | 1 | 0 | yes |
| ALG11    | 0 | 1 | yes |
| ALG12    | 0 | 0 | no  |
| ALG14    | 0 | 0 | no  |
| ALG2     | 0 | 0 | no  |
| ALG3     | 0 | 0 | no  |
| ALG5     | 0 | 0 | no  |
| ALG6     | 0 | 0 | no  |
| ALG8     | 0 | 0 | no  |
| ALG9     | 1 | 0 | no  |
| ALK      | 0 | 2 | no  |
| ALKBH8   | 0 | 0 | no  |
| ALMS1    | 0 | 0 | yes |
| ALOX12B  | 0 | 0 | no  |
| ALOX5    | 0 | 0 | no  |
| ALOX5AP  | 0 | 0 | no  |

|         |    |     |     |
|---------|----|-----|-----|
| ALOXE3  | 0  | 0   | no  |
| ALPK1   | 0  | 0   | no  |
| ALPK3   | 0  | 8   | no  |
| ALPL    | 0  | 1   | no  |
| ALS2    | 0  | 0   | no  |
| ALX1    | 0  | 1   | no  |
| ALX3    | 0  | 0   | no  |
| ALX4    | 1  | 0   | no  |
| AMACR   | 1  | 0   | no  |
| AMBN    | 0  | 0   | no  |
| AMFR    | 0  | 3   | yes |
| AMH     | 0  | 0   | no  |
| AMHR2   | 0  | 1   | no  |
| AMN     | 0  | 0   | no  |
| AMPD1   | 0  | 0   | yes |
| AMPD2   | 0  | 2   | no  |
| AMPD3   | 0  | 0   | yes |
| AMT     | 0  | 0   | no  |
| AMTN    | 0  | 0   | no  |
| ANAPC1  | 88 | 100 | yes |
| ANAPC7  | 0  | 0   | no  |
| ANG     | 1  | 1   | no  |
| ANGPT1  | 0  | 2   | no  |
| ANGPT2  | 0  | 0   | no  |
| ANGPTL3 | 0  | 0   | no  |
| ANGPTL4 | 0  | 0   | no  |
| ANK1    | 0  | 0   | no  |
| ANK2    | 4  | 1   | yes |
| ANK3    | 0  | 1   | yes |
| ANKH    | 0  | 1   | yes |
| ANKLE2  | 2  | 6   | no  |
| ANKRD11 | 0  | 0   | yes |
| ANKRD17 | 0  | 0   | yes |
| ANKRD26 | 0  | 0   | yes |
| ANKS6   | 0  | 0   | no  |
| ANLN    | 0  | 0   | no  |
| ANO1    | 1  | 0   | no  |
| ANO10   | 19 | 6   | no  |
| ANO3    | 0  | 0   | yes |
| ANO5    | 0  | 0   | yes |
| ANO6    | 1  | 0   | no  |

|        |   |   |     |
|--------|---|---|-----|
| ANTXR1 | 0 | 0 | no  |
| ANTXR2 | 3 | 1 | yes |
| ANXA11 | 0 | 0 | yes |
| ANXA5  | 0 | 0 | no  |
| AOPEP  | 0 | 2 | no  |
| AP1B1  | 1 | 1 | yes |
| AP1G1  | 0 | 0 | yes |
| AP1S1  | 0 | 1 | no  |
| AP1S3  | 0 | 1 | no  |
| AP2M1  | 0 | 0 | no  |
| AP2S1  | 0 | 1 | no  |
| AP3B1  | 0 | 1 | no  |
| AP3B2  | 0 | 0 | no  |
| AP3D1  | 0 | 0 | no  |
| AP4B1  | 0 | 0 | no  |
| AP4E1  | 0 | 0 | yes |
| AP4M1  | 0 | 0 | no  |
| AP4S1  | 0 | 1 | yes |
| AP5Z1  | 0 | 1 | no  |
| APC    | 2 | 0 | no  |
| APC2   | 0 | 0 | no  |
| APCDD1 | 0 | 0 | no  |
| APCS   | 0 | 0 | no  |
| APOA1  | 0 | 1 | no  |
| APOA2  | 0 | 0 | no  |
| APOA5  | 0 | 1 | no  |
| APOB   | 0 | 0 | no  |
| APOC2  | 0 | 0 | no  |
| APOC3  | 0 | 1 | no  |
| APOE   | 0 | 1 | no  |
| APOL1  | 0 | 0 | no  |
| APOL2  | 0 | 0 | no  |
| APOL4  | 0 | 0 | no  |
| APP    | 0 | 1 | no  |
| APPL1  | 0 | 0 | no  |
| APRT   | 0 | 0 | no  |
| APTX   | 0 | 0 | no  |
| AQP1   | 0 | 0 | no  |
| AQP2   | 0 | 1 | no  |
| AQP3   | 0 | 0 | no  |
| AQP4   | 0 | 0 | no  |

|          |    |    |     |
|----------|----|----|-----|
| AQP5     | 0  | 1  | no  |
| AQP7     | 0  | 0  | yes |
| ARCN1    | 0  | 1  | no  |
| ARF1     | 0  | 1  | no  |
| ARFGEF1  | 0  | 0  | yes |
| ARFGEF2  | 0  | 3  | no  |
| ARG1     | 0  | 0  | no  |
| ARHGAP26 | 0  | 1  | no  |
| ARHGAP31 | 0  | 0  | no  |
| ARHGDIA  | 0  | 0  | no  |
| ARHGEF1  | 0  | 3  | no  |
| ARHGEF10 | 0  | 1  | no  |
| ARHGEF18 | 3  | 2  | no  |
| ARHGEF2  | 0  | 1  | no  |
| ARID1A   | 0  | 0  | no  |
| ARID1B   | 1  | 1  | no  |
| ARID2    | 0  | 0  | no  |
| ARL13B   | 0  | 0  | yes |
| ARL2     | 0  | 0  | no  |
| ARL2BP   | 0  | 0  | no  |
| ARL3     | 0  | 0  | no  |
| ARL6     | 0  | 0  | no  |
| ARL6IP1  | 1  | 0  | yes |
| ARMC2    | 0  | 1  | no  |
| ARMC5    | 0  | 0  | no  |
| ARMC9    | 28 | 29 | no  |
| ARMS2    | 0  | 0  | no  |
| ARNT2    | 0  | 2  | no  |
| ARPC1B   | 0  | 0  | no  |
| ARPC4    | 0  | 0  | no  |
| ARSA     | 0  | 0  | no  |
| ARSB     | 0  | 1  | yes |
| ARSG     | 1  | 2  | yes |
| ARSK     | 0  | 0  | no  |
| ART4     | 0  | 0  | no  |
| ARV1     | 0  | 0  | no  |
| ASAH1    | 0  | 0  | yes |
| ASB10    | 0  | 0  | no  |
| ASCC1    | 0  | 0  | no  |
| ASH1L    | 0  | 2  | yes |
| ASIP     | 0  | 0  | yes |



|         |    |   |     |
|---------|----|---|-----|
| ASL     | 0  | 1 | yes |
| ASNS    | 24 | 0 | yes |
| ASPA    | 0  | 0 | no  |
| ASPH    | 0  | 0 | yes |
| ASPM    | 0  | 1 | yes |
| ASPN    | 0  | 0 | no  |
| ASPRV1  | 0  | 0 | yes |
| ASPSCR1 | 0  | 1 | no  |
| ASS1    | 0  | 0 | no  |
| ASTL    | 0  | 0 | no  |
| ASXL1   | 0  | 2 | no  |
| ASXL2   | 0  | 0 | yes |
| ASXL3   | 0  | 1 | no  |
| ATAD1   | 0  | 0 | yes |
| ATAD3A  | 0  | 0 | yes |
| ATCAY   | 0  | 0 | no  |
| ATF6    | 0  | 0 | no  |
| ATG16L1 | 0  | 0 | no  |
| ATG5    | 0  | 0 | no  |
| ATG7    | 0  | 1 | yes |
| ATIC    | 0  | 0 | no  |
| ATL1    | 0  | 1 | no  |
| ATL3    | 0  | 0 | no  |
| ATM     | 5  | 1 | no  |
| ATN1    | 0  | 0 | no  |
| ATOH1   | 0  | 0 | no  |
| ATOH7   | 0  | 0 | no  |
| ATP11A  | 8  | 7 | yes |
| ATP13A2 | 0  | 1 | no  |
| ATP13A3 | 0  | 0 | no  |
| ATP1A1  | 0  | 0 | no  |
| ATP1A2  | 0  | 0 | no  |
| ATP1A3  | 0  | 0 | no  |
| ATP1B1  | 0  | 0 | yes |
| ATP2A1  | 0  | 2 | no  |
| ATP2A2  | 0  | 1 | no  |
| ATP2B1  | 0  | 0 | no  |
| ATP2B2  | 1  | 2 | no  |
| ATP2C1  | 0  | 0 | no  |
| ATP5F1A | 0  | 0 | no  |
| ATP5F1B | 0  | 0 | no  |

|          |    |    |     |
|----------|----|----|-----|
| ATP5F1D  | 0  | 0  | no  |
| ATP5F1E  | 0  | 0  | yes |
| ATP5MC3  | 0  | 0  | no  |
| ATP5MK   | 0  | 0  | no  |
| ATP5PO   | 0  | 0  | no  |
| ATP6V0A1 | 0  | 1  | yes |
| ATP6V0A2 | 0  | 1  | no  |
| ATP6V0A4 | 0  | 0  | no  |
| ATP6V0C  | 0  | 0  | no  |
| ATP6V1A  | 0  | 0  | no  |
| ATP6V1B1 | 0  | 0  | no  |
| ATP6V1B2 | 0  | 0  | no  |
| ATP6V1E1 | 0  | 0  | no  |
| ATP7B    | 0  | 1  | no  |
| ATP8A2   | 1  | 0  | no  |
| ATP8B1   | 0  | 0  | no  |
| ATP9A    | 0  | 0  | no  |
| ATPAF2   | 0  | 0  | no  |
| ATR      | 0  | 1  | no  |
| ATXN1    | 0  | 1  | no  |
| ATXN10   | 0  | 0  | no  |
| ATXN2    | 0  | 0  | no  |
| ATXN3    | 0  | 1  | no  |
| ATXN7    | 0  | 0  | no  |
| AUH      | 0  | 0  | no  |
| AURKA    | 1  | 0  | yes |
| AURKC    | 0  | 0  | no  |
| AUTS2    | 17 | 13 | no  |
| AVIL     | 0  | 0  | yes |
| AVP      | 0  | 0  | no  |
| AXIN1    | 0  | 1  | no  |
| AXIN2    | 0  | 0  | no  |
| B2M      | 0  | 0  | no  |
| B3GALNT1 | 0  | 0  | no  |
| B3GALNT2 | 1  | 0  | no  |
| B3GALT6  | 0  | 0  | no  |
| B3GAT3   | 0  | 0  | yes |
| B3GLCT   | 0  | 0  | no  |
| B4GALNT1 | 0  | 0  | no  |
| B4GALNT2 | 0  | 0  | no  |
| B4GALT1  | 0  | 0  | no  |

|         |   |    |     |
|---------|---|----|-----|
| B4GALT7 | 0 | 0  | no  |
| B4GAT1  | 0 | 1  | no  |
| B9D1    | 0 | 5  | no  |
| B9D2    | 0 | 0  | no  |
| BAAT    | 0 | 0  | no  |
| BACH2   | 0 | 0  | no  |
| BAG3    | 0 | 0  | no  |
| BAG5    | 0 | 0  | no  |
| BANF1   | 0 | 1  | no  |
| BAP1    | 0 | 0  | no  |
| BARD1   | 0 | 0  | no  |
| BAX     | 0 | 0  | no  |
| BBIP1   | 0 | 1  | no  |
| BBS1    | 0 | 1  | no  |
| BBS10   | 0 | 0  | yes |
| BBS12   | 0 | 0  | yes |
| BBS2    | 0 | 2  | no  |
| BBS4    | 0 | 0  | yes |
| BBS5    | 0 | 0  | no  |
| BBS7    | 0 | 0  | no  |
| BBS9    | 8 | 58 | no  |
| BCAM    | 0 | 0  | no  |
| BCAS3   | 0 | 1  | yes |
| BCAT2   | 0 | 0  | no  |
| BCHE    | 0 | 0  | no  |
| BCKDHA  | 0 | 0  | no  |
| BCKDHB  | 0 | 1  | no  |
| BCKDK   | 0 | 0  | no  |
| BCL10   | 0 | 0  | no  |
| BCL11A  | 0 | 0  | no  |
| BCL11B  | 0 | 1  | no  |
| BCL2    | 0 | 0  | no  |
| BCL3    | 0 | 0  | no  |
| BCO1    | 0 | 0  | no  |
| BCR     | 8 | 1  | yes |
| BCS1L   | 0 | 0  | no  |
| BDP1    | 4 | 0  | yes |
| BEAN1   | 0 | 0  | no  |
| BEST1   | 0 | 0  | no  |
| BFSP1   | 1 | 0  | no  |
| BFSP2   | 0 | 0  | no  |

|         |   |    |     |
|---------|---|----|-----|
| BHLHA9  | 0 | 3  | no  |
| BHLHE41 | 0 | 0  | no  |
| BICC1   | 0 | 0  | yes |
| BICD2   | 0 | 0  | no  |
| BICRA   | 0 | 0  | no  |
| BIN1    | 0 | 1  | no  |
| BLK     | 0 | 0  | no  |
| BLM     | 0 | 0  | no  |
| BLNK    | 0 | 0  | yes |
| BLOC1S3 | 0 | 1  | no  |
| BLOC1S5 | 0 | 0  | no  |
| BLOC1S6 | 0 | 0  | no  |
| BLTP1   | 0 | 0  | no  |
| BLVRA   | 1 | 1  | no  |
| BMP1    | 0 | 1  | no  |
| BMP2    | 0 | 0  | no  |
| BMP4    | 0 | 0  | no  |
| BMP6    | 0 | 0  | no  |
| BMPER   | 0 | 2  | no  |
| BMPR1A  | 0 | 1  | yes |
| BMPR1B  | 2 | 0  | no  |
| BMPR2   | 1 | 1  | no  |
| BMS1    | 6 | 1  | yes |
| BNC1    | 0 | 0  | no  |
| BNC2    | 0 | 0  | no  |
| BOLA3   | 0 | 0  | no  |
| BPGM    | 0 | 0  | no  |
| BPNT2   | 0 | 0  | no  |
| BPTF    | 4 | 16 | yes |
| BRAF    | 1 | 0  | yes |
| BRAT1   | 0 | 0  | yes |
| BRCA1   | 0 | 2  | yes |
| BRCA2   | 0 | 0  | no  |
| BRDT    | 0 | 0  | no  |
| BRF1    | 6 | 8  | yes |
| BRIP1   | 0 | 0  | no  |
| BRPF1   | 0 | 0  | no  |
| BRWD1   | 0 | 1  | yes |
| BSCL2   | 0 | 0  | no  |
| BSG     | 0 | 0  | no  |
| BSND    | 0 | 0  | no  |

|          |    |    |     |
|----------|----|----|-----|
| BTD      | 0  | 0  | no  |
| BTG4     | 0  | 0  | no  |
| BTNL2    | 0  | 0  | no  |
| BUB1     | 0  | 0  | yes |
| BUB1B    | 0  | 0  | yes |
| BVES     | 1  | 1  | no  |
| C12orf4  | 0  | 0  | no  |
| C12orf57 | 0  | 0  | no  |
| C14orf39 | 0  | 0  | no  |
| C18orf32 | 1  | 0  | no  |
| C19orf12 | 0  | 0  | no  |
| C1QA     | 0  | 0  | no  |
| C1QB     | 0  | 0  | no  |
| C1QBP    | 0  | 0  | no  |
| C1QC     | 0  | 0  | no  |
| C1QTNF5  | 0  | 0  | no  |
| C1R      | 83 | 83 | no  |
| C1S      | 0  | 0  | no  |
| C2       | 0  | 1  | yes |
| C2CD3    | 0  | 0  | no  |
| C2CD6    | 0  | 0  | no  |
| C2orf69  | 0  | 1  | no  |
| C3       | 0  | 0  | no  |
| C3orf52  | 0  | 0  | no  |
| C4A      | 39 | 1  | yes |
| C4B      | 45 | 1  | yes |
| C5       | 0  | 0  | no  |
| C6       | 0  | 0  | no  |
| C7       | 0  | 0  | no  |
| C8A      | 0  | 0  | no  |
| C8B      | 0  | 0  | no  |
| C9       | 0  | 0  | no  |
| C9orf72  | 0  | 0  | no  |
| CA12     | 0  | 0  | no  |
| CA2      | 0  | 6  | no  |
| CA5A     | 0  | 0  | yes |
| CA8      | 0  | 0  | no  |
| CABP2    | 0  | 1  | no  |
| CABP4    | 0  | 1  | no  |
| CACNA1A  | 0  | 0  | no  |
| CACNA1B  | 1  | 0  | yes |

|          |    |   |     |
|----------|----|---|-----|
| CACNA1C  | 5  | 3 | yes |
| CACNA1D  | 1  | 0 | yes |
| CACNA1E  | 0  | 0 | no  |
| CACNA1G  | 0  | 1 | no  |
| CACNA1H  | 0  | 0 | yes |
| CACNA1I  | 0  | 1 | no  |
| CACNA1S  | 0  | 0 | no  |
| CACNA2D1 | 1  | 1 | no  |
| CACNA2D2 | 0  | 1 | yes |
| CACNA2D4 | 0  | 1 | no  |
| CACNB2   | 0  | 0 | no  |
| CACNB4   | 2  | 1 | no  |
| CACNG2   | 1  | 0 | no  |
| CAD      | 0  | 0 | no  |
| CADM3    | 0  | 0 | no  |
| CALCR    | 0  | 0 | no  |
| CALCRL   | 0  | 0 | no  |
| CALM1    | 0  | 0 | yes |
| CALM2    | 0  | 1 | no  |
| CALM3    | 0  | 0 | no  |
| CALR     | 0  | 0 | no  |
| CAMK2A   | 0  | 0 | no  |
| CAMK2B   | 0  | 1 | no  |
| CAMK2G   | 0  | 0 | no  |
| CAMLG    | 0  | 0 | no  |
| CAMSAP1  | 0  | 0 | no  |
| CAMTA1   | 10 | 5 | no  |
| CANT1    | 0  | 1 | no  |
| CAP2     | 1  | 1 | no  |
| CAPN1    | 0  | 0 | yes |
| CAPN10   | 1  | 0 | no  |
| CAPN15   | 0  | 2 | yes |
| CAPN3    | 0  | 0 | no  |
| CAPN5    | 1  | 0 | no  |
| CARD10   | 0  | 0 | no  |
| CARD11   | 0  | 2 | no  |
| CARD14   | 0  | 0 | no  |
| CARD8    | 0  | 0 | no  |
| CARD9    | 0  | 0 | no  |
| CARMIL2  | 1  | 0 | no  |
| CARS1    | 0  | 0 | no  |

|          |   |    |     |
|----------|---|----|-----|
| CARS2    | 0 | 1  | no  |
| CARTPT   | 0 | 0  | no  |
| CASP10   | 0 | 0  | yes |
| CASP14   | 1 | 0  | no  |
| CASP8    | 1 | 0  | no  |
| CASQ1    | 0 | 0  | no  |
| CASQ2    | 0 | 0  | no  |
| CASR     | 0 | 1  | no  |
| CAST     | 0 | 0  | no  |
| CAT      | 0 | 0  | no  |
| CATIP    | 0 | 0  | no  |
| CATSPER1 | 0 | 1  | no  |
| CAV1     | 0 | 0  | no  |
| CAV3     | 0 | 0  | no  |
| CAVIN1   | 0 | 1  | no  |
| CBFB     | 0 | 0  | no  |
| CBL      | 0 | 0  | no  |
| CBLB     | 0 | 2  | no  |
| CBLIF    | 0 | 0  | no  |
| CBS      | 0 | 0  | yes |
| CBX2     | 0 | 0  | no  |
| CC2D1A   | 0 | 0  | no  |
| CC2D2A   | 0 | 2  | no  |
| CCBE1    | 0 | 0  | no  |
| CCDC103  | 0 | 0  | no  |
| CCDC115  | 0 | 30 | no  |
| CCDC134  | 0 | 0  | no  |
| CCDC174  | 0 | 2  | no  |
| CCDC26   | 0 | 1  | no  |
| CCDC28B  | 0 | 0  | no  |
| CCDC32   | 0 | 0  | no  |
| CCDC34   | 0 | 0  | no  |
| CCDC39   | 0 | 0  | yes |
| CCDC40   | 0 | 0  | no  |
| CCDC47   | 0 | 0  | no  |
| CCDC50   | 1 | 0  | no  |
| CCDC62   | 0 | 0  | yes |
| CCDC65   | 0 | 0  | no  |
| CCDC78   | 0 | 1  | no  |
| CCDC8    | 0 | 0  | no  |
| CCDC88A  | 0 | 0  | no  |

|         |    |   |     |
|---------|----|---|-----|
| CCDC88C | 0  | 0 | no  |
| CCL11   | 0  | 0 | no  |
| CCL2    | 0  | 0 | no  |
| CCL3    | 15 | 0 | yes |
| CCL5    | 0  | 0 | no  |
| CCM2    | 0  | 0 | yes |
| CCN6    | 0  | 0 | no  |
| CCND1   | 0  | 0 | no  |
| CCND2   | 0  | 0 | no  |
| CCNF    | 0  | 0 | no  |
| CCNK    | 0  | 0 | yes |
| CCNO    | 0  | 0 | no  |
| CCR2    | 0  | 0 | no  |
| CCR5    | 0  | 0 | no  |
| CCT5    | 0  | 0 | no  |
| CD151   | 0  | 0 | no  |
| CD164   | 0  | 0 | no  |
| CD19    | 0  | 1 | no  |
| CD207   | 0  | 0 | no  |
| CD209   | 0  | 0 | yes |
| CD244   | 1  | 0 | no  |
| CD247   | 0  | 2 | no  |
| CD27    | 0  | 0 | no  |
| CD2AP   | 0  | 3 | no  |
| CD320   | 0  | 0 | yes |
| CD36    | 0  | 1 | no  |
| CD3D    | 0  | 0 | no  |
| CD3E    | 0  | 0 | no  |
| CD3G    | 0  | 0 | no  |
| CD4     | 0  | 0 | no  |
| CD40    | 0  | 0 | no  |
| CD44    | 0  | 0 | no  |
| CD46    | 0  | 1 | yes |
| CD55    | 0  | 0 | no  |
| CD59    | 0  | 0 | no  |
| CD70    | 0  | 0 | no  |
| CD79A   | 0  | 0 | no  |
| CD79B   | 0  | 0 | yes |
| CD81    | 0  | 0 | no  |
| CD8A    | 0  | 0 | no  |
| CD96    | 3  | 1 | yes |



|          |   |   |     |
|----------|---|---|-----|
| CDAN1    | 0 | 0 | no  |
| CDC14A   | 0 | 0 | no  |
| CDC20    | 0 | 0 | no  |
| CDC40    | 0 | 0 | yes |
| CDC42    | 0 | 1 | yes |
| CDC42BPB | 0 | 1 | no  |
| CDC45    | 0 | 2 | no  |
| CDC6     | 0 | 0 | no  |
| CDC73    | 0 | 0 | no  |
| CDCA7    | 0 | 0 | no  |
| CDH1     | 1 | 2 | no  |
| CDH11    | 0 | 0 | no  |
| CDH15    | 0 | 0 | no  |
| CDH2     | 0 | 1 | yes |
| CDH23    | 0 | 0 | no  |
| CDH3     | 0 | 1 | no  |
| CDHR1    | 0 | 0 | no  |
| CDIN1    | 0 | 0 | yes |
| CDK10    | 0 | 0 | no  |
| CDK13    | 1 | 0 | no  |
| CDK19    | 0 | 0 | yes |
| CDK4     | 0 | 0 | no  |
| CDK5     | 0 | 0 | no  |
| CDK5RAP2 | 1 | 0 | yes |
| CDK6     | 0 | 0 | no  |
| CDK8     | 0 | 1 | yes |
| CDKN1B   | 0 | 0 | no  |
| CDKN1C   | 0 | 0 | no  |
| CDKN2A   | 0 | 0 | no  |
| CDON     | 0 | 0 | yes |
| CDSN     | 1 | 0 | no  |
| CDT1     | 0 | 0 | no  |
| CEACAM16 | 0 | 0 | no  |
| CEBPA    | 0 | 0 | no  |
| CEBPE    | 0 | 0 | no  |
| CEL      | 5 | 0 | yes |
| CELA2A   | 0 | 0 | yes |
| CELF2    | 0 | 1 | no  |
| CELSR1   | 0 | 1 | yes |
| CENATAC  | 0 | 1 | no  |
| CENPE    | 0 | 0 | no  |

|         |   |   |     |
|---------|---|---|-----|
| CENPF   | 5 | 2 | yes |
| CENPJ   | 0 | 1 | yes |
| CENPT   | 0 | 1 | no  |
| CEP104  | 0 | 0 | no  |
| CEP112  | 0 | 1 | no  |
| CEP120  | 0 | 0 | yes |
| CEP135  | 0 | 0 | no  |
| CEP152  | 0 | 0 | no  |
| CEP164  | 0 | 0 | yes |
| CEP19   | 0 | 0 | no  |
| CEP250  | 1 | 0 | no  |
| CEP290  | 0 | 0 | yes |
| CEP41   | 0 | 1 | no  |
| CEP43   | 0 | 1 | no  |
| CEP55   | 1 | 0 | no  |
| CEP57   | 0 | 0 | no  |
| CEP63   | 0 | 1 | no  |
| CEP78   | 0 | 0 | no  |
| CEP83   | 0 | 0 | no  |
| CEP85L  | 0 | 2 | yes |
| CERKL   | 0 | 1 | no  |
| CERS1   | 0 | 1 | no  |
| CERS3   | 0 | 0 | yes |
| CERT1   | 0 | 0 | no  |
| CES1    | 6 | 2 | yes |
| CETP    | 0 | 2 | no  |
| CFAP251 | 0 | 0 | no  |
| CFAP298 | 0 | 0 | yes |
| CFAP300 | 0 | 0 | no  |
| CFAP410 | 0 | 0 | no  |
| CFAP418 | 1 | 0 | no  |
| CFAP43  | 0 | 0 | yes |
| CFAP44  | 0 | 0 | no  |
| CFAP45  | 0 | 0 | no  |
| CFAP52  | 1 | 0 | no  |
| CFAP53  | 1 | 0 | no  |
| CFAP58  | 0 | 0 | no  |
| CFAP61  | 0 | 1 | no  |
| CFAP65  | 0 | 0 | no  |
| CFAP69  | 1 | 1 | no  |
| CFAP70  | 1 | 0 | yes |

|         |    |    |     |
|---------|----|----|-----|
| CFAP74  | 2  | 1  | no  |
| CFAP91  | 0  | 2  | no  |
| CFB     | 0  | 1  | no  |
| CFC1    | 4  | 89 | yes |
| CFD     | 0  | 1  | no  |
| CFH     | 7  | 0  | yes |
| CFHR1   | 11 | 5  | yes |
| CFHR3   | 2  | 5  | yes |
| CFHR5   | 0  | 0  | no  |
| CFI     | 0  | 2  | no  |
| CFL2    | 0  | 0  | no  |
| CFTR    | 83 | 9  | no  |
| CHAMP1  | 0  | 17 | yes |
| CHAT    | 0  | 0  | no  |
| CHCHD10 | 0  | 1  | no  |
| CHCHD2  | 0  | 12 | no  |
| CHD1    | 0  | 0  | no  |
| CHD2    | 0  | 0  | no  |
| CHD3    | 0  | 0  | no  |
| CHD4    | 0  | 0  | no  |
| CHD5    | 1  | 0  | yes |
| CHD7    | 0  | 0  | no  |
| CHD8    | 2  | 0  | no  |
| CHEK2   | 0  | 0  | yes |
| CHI3L1  | 0  | 0  | no  |
| CHIC2   | 0  | 1  | yes |
| CHIT1   | 0  | 0  | no  |
| CHKA    | 0  | 0  | no  |
| CHKB    | 0  | 0  | no  |
| CHMP1A  | 1  | 0  | no  |
| CHMP2B  | 0  | 1  | no  |
| CHMP4B  | 0  | 0  | no  |
| CHN1    | 0  | 0  | no  |
| CHP1    | 0  | 0  | yes |
| CHRM3   | 2  | 2  | no  |
| CHRNA1  | 0  | 0  | no  |
| CHRNA2  | 0  | 1  | no  |
| CHRNA3  | 0  | 0  | no  |
| CHRNA4  | 5  | 0  | no  |
| CHRNA5  | 0  | 0  | no  |
| CHRN1   | 0  | 0  | no  |

|        |   |   |     |
|--------|---|---|-----|
| CHRN2  | 0 | 0 | no  |
| CHRND  | 0 | 0 | no  |
| CHRNE  | 0 | 1 | no  |
| CHRNG  | 0 | 0 | no  |
| CHST11 | 0 | 0 | no  |
| CHST14 | 1 | 0 | no  |
| CHST3  | 0 | 0 | no  |
| CHST6  | 1 | 1 | no  |
| CHST8  | 0 | 0 | no  |
| CHSY1  | 0 | 0 | no  |
| CHUK   | 0 | 0 | no  |
| CIB1   | 0 | 0 | yes |
| CIB2   | 0 | 0 | no  |
| CIBAR1 | 0 | 0 | yes |
| CIC    | 0 | 0 | no  |
| CIDEC  | 0 | 0 | yes |
| CIITA  | 0 | 0 | no  |
| CILK1  | 0 | 0 | no  |
| CILP   | 0 | 0 | no  |
| CIROP  | 0 | 0 | no  |
| CISD2  | 6 | 0 | yes |
| CISH   | 0 | 0 | no  |
| CIT    | 0 | 0 | no  |
| CITED2 | 0 | 0 | no  |
| CKAP2L | 0 | 0 | no  |
| CLCC1  | 0 | 4 | no  |
| CLCF1  | 0 | 0 | no  |
| CLCN1  | 0 | 6 | no  |
| CLCN2  | 0 | 0 | no  |
| CLCN3  | 0 | 0 | yes |
| CLCN6  | 0 | 4 | no  |
| CLCN7  | 0 | 0 | no  |
| CLCNKA | 4 | 1 | yes |
| CLCNKB | 2 | 1 | yes |
| CLDN1  | 0 | 0 | no  |
| CLDN10 | 0 | 0 | no  |
| CLDN11 | 0 | 1 | no  |
| CLDN14 | 2 | 0 | yes |
| CLDN16 | 0 | 0 | no  |
| CLDN19 | 0 | 0 | no  |
| CLDN9  | 0 | 0 | yes |

|         |    |    |     |
|---------|----|----|-----|
| CLEC1A  | 0  | 1  | no  |
| CLEC3B  | 0  | 1  | no  |
| CLEC7A  | 0  | 1  | no  |
| CLIC5   | 1  | 0  | no  |
| CLMP    | 0  | 0  | yes |
| CLN3    | 54 | 86 | yes |
| CLN5    | 0  | 0  | no  |
| CLN6    | 0  | 0  | yes |
| CLN8    | 0  | 1  | no  |
| CLP1    | 0  | 0  | no  |
| CLPB    | 0  | 0  | no  |
| CLPP    | 0  | 0  | no  |
| CLPX    | 0  | 0  | no  |
| CLRN1   | 0  | 0  | no  |
| CLRN2   | 0  | 0  | no  |
| CLTC    | 0  | 1  | no  |
| CNBP    | 0  | 0  | no  |
| CNGA1   | 0  | 1  | no  |
| CNGA3   | 0  | 0  | no  |
| CNGB1   | 0  | 0  | no  |
| CNGB3   | 3  | 5  | no  |
| CNNM2   | 0  | 0  | no  |
| CNNM4   | 0  | 0  | no  |
| CNOT1   | 0  | 0  | no  |
| CNOT2   | 6  | 4  | no  |
| CNOT3   | 0  | 0  | no  |
| CNP     | 0  | 0  | no  |
| CNPY3   | 0  | 0  | no  |
| CNTN1   | 3  | 4  | yes |
| CNTN2   | 0  | 0  | no  |
| CNTNAP1 | 0  | 1  | no  |
| CNTNAP2 | 1  | 5  | yes |
| COA3    | 0  | 1  | no  |
| COA5    | 0  | 0  | no  |
| COA6    | 0  | 0  | no  |
| COA7    | 0  | 1  | no  |
| COA8    | 0  | 1  | no  |
| COASY   | 0  | 1  | yes |
| COCH    | 0  | 1  | no  |
| COG1    | 0  | 0  | no  |
| COG2    | 0  | 0  | no  |

|          |   |   |     |
|----------|---|---|-----|
| COG4     | 0 | 0 | no  |
| COG5     | 0 | 1 | no  |
| COG6     | 0 | 0 | no  |
| COG7     | 0 | 1 | no  |
| COG8     | 0 | 0 | no  |
| COL10A1  | 0 | 0 | no  |
| COL11A1  | 3 | 1 | no  |
| COL11A2  | 0 | 0 | no  |
| COL12A1  | 0 | 0 | no  |
| COL13A1  | 0 | 1 | no  |
| COL17A1  | 0 | 0 | no  |
| COL18A1  | 1 | 5 | no  |
| COL1A1   | 0 | 0 | no  |
| COL1A2   | 0 | 0 | no  |
| COL25A1  | 1 | 0 | yes |
| COL27A1  | 0 | 1 | yes |
| COL2A1   | 0 | 1 | no  |
| COL3A1   | 0 | 0 | no  |
| COL4A1   | 0 | 0 | no  |
| COL4A2   | 0 | 0 | no  |
| COL4A3   | 1 | 1 | no  |
| COL4A4   | 2 | 1 | no  |
| COL5A1   | 0 | 1 | no  |
| COL5A2   | 1 | 0 | yes |
| COL6A1   | 0 | 0 | no  |
| COL6A2   | 0 | 0 | no  |
| COL6A3   | 0 | 0 | no  |
| COL7A1   | 0 | 1 | no  |
| COL8A2   | 0 | 0 | no  |
| COL9A1   | 0 | 0 | yes |
| COL9A2   | 0 | 0 | no  |
| COL9A3   | 0 | 0 | no  |
| COLEC10  | 0 | 0 | no  |
| COLEC11  | 0 | 2 | no  |
| COLGALT1 | 0 | 0 | no  |
| COLQ     | 0 | 0 | no  |
| COMP     | 0 | 1 | no  |
| COMT     | 1 | 4 | no  |
| COPA     | 0 | 0 | yes |
| COPB1    | 0 | 0 | no  |
| COPB2    | 0 | 0 | no  |

|         |   |    |     |
|---------|---|----|-----|
| COQ2    | 0 | 0  | no  |
| COQ4    | 0 | 0  | no  |
| COQ5    | 0 | 0  | no  |
| COQ6    | 0 | 0  | no  |
| COQ7    | 0 | 0  | no  |
| COQ8A   | 1 | 2  | no  |
| COQ8B   | 0 | 0  | no  |
| COQ9    | 0 | 0  | no  |
| CORIN   | 0 | 2  | no  |
| CORO1A  | 7 | 37 | yes |
| COX10   | 0 | 48 | yes |
| COX11   | 0 | 0  | yes |
| COX14   | 0 | 0  | no  |
| COX15   | 0 | 0  | no  |
| COX16   | 0 | 0  | no  |
| COX20   | 0 | 0  | no  |
| COX4I1  | 0 | 0  | no  |
| COX4I2  | 0 | 4  | no  |
| COX5A   | 0 | 1  | no  |
| COX6A1  | 0 | 0  | no  |
| COX6A2  | 0 | 0  | no  |
| COX6B1  | 0 | 1  | no  |
| COX8A   | 0 | 0  | no  |
| CP      | 0 | 0  | yes |
| CPA6    | 0 | 0  | yes |
| CPAMD8  | 0 | 0  | yes |
| CPE     | 0 | 0  | yes |
| CPLANE1 | 0 | 0  | no  |
| CPLX1   | 0 | 2  | no  |
| CPN1    | 0 | 0  | no  |
| CPOX    | 0 | 0  | no  |
| CPS1    | 0 | 1  | no  |
| CPSF1   | 0 | 14 | yes |
| CPSF3   | 0 | 0  | no  |
| CPT1A   | 0 | 0  | no  |
| CPT1C   | 0 | 1  | no  |
| CPT2    | 0 | 1  | no  |
| CR1     | 3 | 0  | yes |
| CR2     | 0 | 0  | yes |
| CRADD   | 0 | 1  | no  |
| CRAT    | 0 | 0  | no  |

|            |   |   |     |
|------------|---|---|-----|
| CRB1       | 0 | 0 | no  |
| CRB2       | 0 | 0 | no  |
| CRBN       | 0 | 1 | no  |
| CREB1      | 0 | 0 | no  |
| CREB3L1    | 0 | 0 | no  |
| CREB3L3    | 0 | 1 | no  |
| CREBBP     | 0 | 1 | no  |
| CRELD1     | 0 | 0 | no  |
| CRIP1      | 0 | 0 | no  |
| CRLF1      | 0 | 1 | yes |
| CRLS1      | 0 | 0 | no  |
| CRPPA      | 0 | 1 | no  |
| CRTAP      | 0 | 0 | no  |
| CRTC1      | 0 | 1 | no  |
| CRX        | 0 | 0 | no  |
| CRY1       | 0 | 1 | no  |
| CRYAA      | 0 | 0 | yes |
| CRYAB      | 0 | 0 | no  |
| CRYBA1     | 0 | 1 | yes |
| CRYBA2     | 0 | 1 | no  |
| CRYBA4     | 0 | 0 | no  |
| CRYBB1     | 0 | 0 | no  |
| CRYBB2     | 0 | 0 | yes |
| CRYBB3     | 0 | 0 | no  |
| CRYGB      | 0 | 0 | no  |
| CRYGC      | 0 | 0 | no  |
| CRYGD      | 0 | 0 | no  |
| CRYGS      | 0 | 0 | no  |
| CRYM       | 1 | 0 | no  |
| CSF1R      | 0 | 0 | no  |
| CSF2RB     | 0 | 0 | no  |
| CSF3R      | 0 | 0 | no  |
| CSGALNACT1 | 0 | 0 | no  |
| CSH1       | 0 | 0 | yes |
| CSNK1D     | 0 | 0 | no  |
| CSNK2A1    | 0 | 0 | no  |
| CSNK2B     | 0 | 1 | no  |
| CSPP1      | 1 | 0 | yes |
| CSR3P      | 0 | 0 | no  |
| CST3       | 0 | 0 | no  |
| CST6       | 0 | 1 | no  |



|         |   |    |     |
|---------|---|----|-----|
| CSTA    | 0 | 0  | no  |
| CSTB    | 0 | 0  | no  |
| CTBP1   | 0 | 0  | no  |
| CTC1    | 0 | 1  | no  |
| CTCF    | 1 | 0  | no  |
| CTDP1   | 1 | 15 | no  |
| CTH     | 0 | 0  | no  |
| CTHRC1  | 0 | 0  | no  |
| CTLA4   | 0 | 0  | no  |
| CTNNA1  | 0 | 0  | no  |
| CTNNA2  | 0 | 3  | yes |
| CTNNA3  | 3 | 3  | no  |
| CTNNB1  | 0 | 0  | no  |
| CTNNBL1 | 0 | 2  | no  |
| CTNND1  | 0 | 1  | yes |
| CTNS    | 0 | 0  | no  |
| CTPS1   | 0 | 0  | no  |
| CTRC    | 0 | 0  | yes |
| CTSA    | 0 | 0  | no  |
| CTSB    | 0 | 0  | no  |
| CTSC    | 0 | 2  | no  |
| CTSD    | 0 | 0  | no  |
| CTSF    | 0 | 1  | no  |
| CTSK    | 0 | 0  | no  |
| CTU2    | 0 | 0  | no  |
| CUBN    | 0 | 0  | yes |
| CUL3    | 0 | 1  | no  |
| CUL7    | 0 | 0  | no  |
| CUX1    | 2 | 1  | yes |
| CUX2    | 0 | 0  | no  |
| CWC27   | 0 | 0  | no  |
| CWF19L1 | 0 | 0  | no  |
| CX3CR1  | 0 | 1  | no  |
| CXCL12  | 0 | 0  | no  |
| CXCR1   | 0 | 0  | no  |
| CXCR2   | 0 | 0  | no  |
| CXCR4   | 0 | 0  | no  |
| CYB561  | 0 | 0  | no  |
| CYB5A   | 0 | 1  | no  |
| CYB5R3  | 0 | 0  | no  |
| CYBA    | 0 | 0  | no  |

|         |    |    |     |
|---------|----|----|-----|
| CYBC1   | 0  | 0  | no  |
| CYC1    | 0  | 11 | no  |
| CYCS    | 0  | 0  | yes |
| CYFIP2  | 0  | 2  | no  |
| CYLD    | 0  | 0  | no  |
| CYP11A1 | 0  | 0  | no  |
| CYP11B1 | 0  | 1  | yes |
| CYP11B2 | 0  | 1  | yes |
| CYP17A1 | 0  | 0  | no  |
| CYP19A1 | 0  | 0  | no  |
| CYP1B1  | 0  | 0  | no  |
| CYP21A2 | 15 | 1  | yes |
| CYP24A1 | 0  | 0  | no  |
| CYP26B1 | 0  | 0  | no  |
| CYP26C1 | 0  | 0  | no  |
| CYP27A1 | 0  | 0  | no  |
| CYP27B1 | 0  | 0  | no  |
| CYP2A6  | 1  | 0  | yes |
| CYP2B6  | 0  | 0  | yes |
| CYP2C19 | 0  | 6  | yes |
| CYP2C8  | 0  | 0  | yes |
| CYP2C9  | 0  | 2  | no  |
| CYP2D6  | 5  | 0  | yes |
| CYP2R1  | 0  | 0  | no  |
| CYP2U1  | 0  | 1  | no  |
| CYP3A4  | 0  | 0  | yes |
| CYP3A5  | 0  | 0  | yes |
| CYP4F22 | 0  | 0  | yes |
| CYP4V2  | 1  | 0  | no  |
| CYP7B1  | 0  | 1  | no  |
| D2HGDH  | 1  | 0  | no  |
| DAAM2   | 0  | 0  | yes |
| DAB1    | 4  | 3  | yes |
| DACT1   | 0  | 0  | no  |
| DAG1    | 0  | 1  | no  |
| DALRD3  | 0  | 1  | no  |
| DAOA    | 0  | 0  | no  |
| DARS1   | 1  | 0  | no  |
| DARS2   | 0  | 0  | no  |
| DAZL    | 0  | 0  | yes |
| DBH     | 0  | 1  | no  |

|         |   |    |     |
|---------|---|----|-----|
| DBR1    | 0 | 0  | no  |
| DBT     | 0 | 0  | no  |
| DCAF17  | 0 | 2  | no  |
| DCAF8   | 0 | 0  | yes |
| DCC     | 1 | 0  | no  |
| DCDC2   | 1 | 1  | no  |
| DCHS1   | 0 | 0  | no  |
| DCLRE1B | 0 | 0  | no  |
| DCLRE1C | 0 | 1  | yes |
| DCN     | 0 | 0  | no  |
| DCPS    | 0 | 0  | no  |
| DCT     | 0 | 0  | no  |
| DCTN1   | 0 | 0  | no  |
| DCXR    | 0 | 0  | no  |
| DDB1    | 0 | 0  | no  |
| DDB2    | 0 | 0  | no  |
| DDC     | 0 | 0  | no  |
| DDHD1   | 0 | 0  | no  |
| DDHD2   | 0 | 0  | no  |
| DDOST   | 0 | 1  | no  |
| DDR2    | 0 | 25 | yes |
| DDRGK1  | 0 | 0  | no  |
| DDX11   | 1 | 53 | yes |
| DDX41   | 0 | 0  | no  |
| DDX59   | 0 | 0  | no  |
| DDX6    | 0 | 1  | yes |
| DEAF1   | 0 | 0  | no  |
| DEF6    | 0 | 0  | no  |
| DEGS1   | 0 | 0  | no  |
| DEK     | 0 | 0  | no  |
| DENND5A | 0 | 0  | no  |
| DEPDC5  | 0 | 1  | no  |
| DES     | 0 | 0  | no  |
| DGAT1   | 0 | 13 | no  |
| DGKE    | 0 | 0  | yes |
| DGUOK   | 0 | 0  | no  |
| DHCR24  | 0 | 1  | no  |
| DHCR7   | 0 | 0  | no  |
| DHDDS   | 0 | 0  | yes |
| DHFR    | 0 | 0  | yes |
| DHH     | 0 | 0  | no  |

|         |   |   |     |
|---------|---|---|-----|
| DHODH   | 1 | 0 | yes |
| DHPS    | 0 | 1 | no  |
| DHTKD1  | 0 | 0 | no  |
| DHX16   | 0 | 0 | no  |
| DHX30   | 0 | 0 | no  |
| DHX37   | 0 | 0 | no  |
| DHX38   | 0 | 0 | no  |
| DIABLO  | 0 | 0 | no  |
| DIAPH1  | 0 | 0 | no  |
| DIAPH3  | 0 | 0 | no  |
| DICER1  | 0 | 0 | yes |
| DIO1    | 0 | 1 | no  |
| DIP2B   | 0 | 0 | no  |
| DIS3L2  | 4 | 0 | yes |
| DISC1   | 0 | 2 | no  |
| DLAT    | 0 | 0 | no  |
| DLC1    | 0 | 0 | no  |
| DLD     | 0 | 0 | no  |
| DLG4    | 0 | 0 | no  |
| DLL1    | 0 | 0 | no  |
| DLL3    | 0 | 0 | no  |
| DLL4    | 0 | 0 | no  |
| DLST    | 0 | 0 | yes |
| DLX3    | 0 | 0 | no  |
| DLX4    | 0 | 0 | no  |
| DLX5    | 0 | 0 | no  |
| DMGDH   | 3 | 2 | yes |
| DMP1    | 0 | 0 | no  |
| DMPK    | 0 | 0 | no  |
| DMXL2   | 0 | 0 | no  |
| DNA2    | 0 | 0 | no  |
| DNAAF1  | 0 | 0 | no  |
| DNAAF11 | 0 | 0 | no  |
| DNAAF2  | 0 | 0 | no  |
| DNAAF3  | 0 | 0 | no  |
| DNAAF4  | 0 | 0 | yes |
| DNAAF5  | 0 | 1 | no  |
| DNAH1   | 0 | 0 | no  |
| DNAH10  | 0 | 1 | no  |
| DNAH11  | 0 | 1 | yes |
| DNAH17  | 0 | 0 | no  |

|          |   |   |     |
|----------|---|---|-----|
| DNAH2    | 0 | 0 | no  |
| DNAH5    | 0 | 0 | no  |
| DNAH7    | 0 | 1 | no  |
| DNAH8    | 0 | 0 | no  |
| DNAH9    | 0 | 0 | no  |
| DNAI1    | 0 | 0 | no  |
| DNAI2    | 0 | 0 | no  |
| DNAJB11  | 0 | 0 | no  |
| DNAJB13  | 0 | 0 | no  |
| DNAJB2   | 0 | 0 | no  |
| DNAJB4   | 0 | 1 | no  |
| DNAJB6   | 0 | 0 | no  |
| DNAJC12  | 0 | 0 | no  |
| DNAJC19  | 0 | 0 | yes |
| DNAJC21  | 0 | 0 | no  |
| DNAJC3   | 0 | 1 | no  |
| DNAJC30  | 0 | 0 | no  |
| DNAJC5   | 0 | 0 | yes |
| DNAJC6   | 1 | 0 | no  |
| DNAL1    | 0 | 0 | no  |
| DNAL4    | 0 | 0 | no  |
| DNALI1   | 0 | 0 | no  |
| DNASE1   | 0 | 0 | no  |
| DNASE1L3 | 0 | 0 | no  |
| DNASE2   | 0 | 0 | no  |
| DNHD1    | 0 | 0 | no  |
| DNM1     | 0 | 0 | yes |
| DNM1L    | 0 | 0 | yes |
| DNM2     | 0 | 0 | no  |
| DNMBP    | 0 | 0 | yes |
| DNMT1    | 0 | 1 | no  |
| DNMT3A   | 0 | 1 | no  |
| DNMT3B   | 0 | 0 | no  |
| DOCK2    | 1 | 0 | yes |
| DOCK3    | 1 | 1 | yes |
| DOCK6    | 0 | 0 | no  |
| DOCK7    | 0 | 0 | no  |
| DOCK8    | 2 | 2 | yes |
| DOHH     | 0 | 0 | no  |
| DOK7     | 0 | 0 | no  |
| DOLK     | 0 | 0 | no  |

|         |    |     |     |
|---------|----|-----|-----|
| DONSON  | 0  | 1   | yes |
| DPAGT1  | 0  | 0   | no  |
| DPF2    | 0  | 0   | yes |
| DPH1    | 0  | 0   | no  |
| DPH2    | 0  | 0   | no  |
| DPH5    | 0  | 0   | no  |
| DPM1    | 0  | 0   | yes |
| DPM2    | 0  | 0   | no  |
| DPM3    | 0  | 0   | yes |
| DPP6    | 98 | 100 | yes |
| DPP9    | 0  | 0   | no  |
| DPY19L2 | 43 | 14  | yes |
| DPYD    | 0  | 3   | no  |
| DPYS    | 0  | 0   | no  |
| DPYSL5  | 0  | 0   | no  |
| DRAM2   | 0  | 0   | no  |
| DRC1    | 0  | 0   | no  |
| DRD3    | 0  | 0   | no  |
| DRD4    | 0  | 0   | no  |
| DRD5    | 0  | 0   | yes |
| DSC2    | 0  | 0   | no  |
| DSC3    | 0  | 1   | no  |
| DSE     | 0  | 0   | yes |
| DSG1    | 0  | 0   | no  |
| DSG2    | 0  | 0   | no  |
| DSG3    | 0  | 0   | no  |
| DSG4    | 0  | 0   | no  |
| DSP     | 0  | 0   | no  |
| DSPP    | 0  | 0   | no  |
| DST     | 1  | 2   | yes |
| DSTYK   | 0  | 0   | no  |
| DTNA    | 0  | 0   | no  |
| DTNBP1  | 0  | 1   | no  |
| DTYMK   | 0  | 0   | no  |
| DUOX2   | 0  | 0   | yes |
| DUOXA2  | 0  | 0   | yes |
| DUSP6   | 0  | 0   | no  |
| DUT     | 0  | 0   | yes |
| DVL1    | 0  | 0   | no  |
| DVL3    | 0  | 0   | no  |
| DYM     | 1  | 0   | no  |

|          |   |    |     |
|----------|---|----|-----|
| DYNC1H1  | 0 | 1  | no  |
| DYNC1I2  | 0 | 2  | no  |
| DYNC2H1  | 0 | 0  | yes |
| DYNC2I1  | 2 | 15 | yes |
| DYNC2I2  | 0 | 0  | no  |
| DYNC2LI1 | 0 | 0  | no  |
| DYNLT2B  | 0 | 1  | no  |
| DYRK1A   | 0 | 0  | no  |
| DYRK1B   | 0 | 0  | no  |
| DYSF     | 0 | 0  | no  |
| DZIP1    | 0 | 0  | no  |
| DZIP1L   | 0 | 0  | yes |
| EARS2    | 0 | 0  | no  |
| EBF3     | 0 | 0  | no  |
| ECE1     | 0 | 1  | no  |
| ECEL1    | 0 | 0  | no  |
| ECHS1    | 0 | 3  | no  |
| ECM1     | 0 | 0  | no  |
| EDAR     | 0 | 0  | no  |
| EDARADD  | 0 | 0  | no  |
| EDC3     | 0 | 0  | no  |
| EDEM3    | 0 | 0  | no  |
| EDN1     | 0 | 1  | no  |
| EDN3     | 0 | 1  | no  |
| EDNRA    | 0 | 0  | no  |
| EDNRB    | 1 | 0  | no  |
| EED      | 0 | 1  | no  |
| EEF1A2   | 0 | 0  | no  |
| EEF2     | 0 | 0  | yes |
| EFEMP1   | 0 | 0  | yes |
| EFEMP2   | 0 | 0  | no  |
| EFHC1    | 4 | 0  | no  |
| EFL1     | 4 | 0  | yes |
| EFTUD2   | 0 | 0  | no  |
| EGF      | 0 | 0  | no  |
| EGFR     | 0 | 5  | no  |
| EGLN1    | 0 | 2  | yes |
| EGR2     | 0 | 0  | no  |
| EHBP1    | 0 | 1  | yes |
| EHHADH   | 0 | 0  | yes |
| EHMT1    | 2 | 5  | no  |

|         |   |   |     |
|---------|---|---|-----|
| EIF2AK1 | 0 | 1 | no  |
| EIF2AK2 | 0 | 0 | yes |
| EIF2AK3 | 0 | 1 | no  |
| EIF2AK4 | 0 | 0 | yes |
| EIF2B1  | 0 | 1 | no  |
| EIF2B2  | 0 | 0 | no  |
| EIF2B3  | 0 | 0 | yes |
| EIF2B4  | 0 | 0 | no  |
| EIF2B5  | 0 | 0 | no  |
| EIF3F   | 0 | 0 | no  |
| EIF4A2  | 0 | 0 | no  |
| EIF4A3  | 0 | 0 | no  |
| EIF4E   | 0 | 0 | yes |
| EIF4G1  | 0 | 0 | no  |
| EIF5A   | 0 | 0 | no  |
| ELAC2   | 0 | 0 | no  |
| ELANE   | 0 | 0 | no  |
| ELMO2   | 1 | 0 | yes |
| ELMOD3  | 0 | 1 | yes |
| ELN     | 0 | 0 | no  |
| ELOVL1  | 0 | 0 | no  |
| ELOVL4  | 0 | 0 | yes |
| ELOVL5  | 0 | 0 | no  |
| ELP1    | 0 | 0 | yes |
| ELP2    | 0 | 0 | no  |
| ELP4    | 0 | 0 | yes |
| EMC1    | 0 | 0 | no  |
| EMC10   | 0 | 1 | no  |
| EMG1    | 0 | 0 | no  |
| EMILIN1 | 0 | 0 | no  |
| EML1    | 0 | 0 | no  |
| EMP2    | 0 | 0 | no  |
| EMX2    | 0 | 0 | no  |
| EN1     | 0 | 0 | no  |
| ENAM    | 0 | 0 | no  |
| ENG     | 0 | 1 | no  |
| ENO3    | 0 | 1 | no  |
| ENPP1   | 0 | 1 | yes |
| ENTPD1  | 0 | 0 | no  |
| EOGT    | 0 | 0 | yes |
| EP300   | 0 | 0 | no  |



|         |   |   |     |
|---------|---|---|-----|
| EPAS1   | 0 | 0 | no  |
| EPB41   | 0 | 1 | no  |
| EPB41L1 | 0 | 0 | no  |
| EPB42   | 6 | 1 | no  |
| EPCAM   | 0 | 1 | no  |
| EPG5    | 0 | 0 | yes |
| EPHA10  | 0 | 0 | no  |
| EPHA2   | 0 | 1 | no  |
| EPHB2   | 0 | 2 | no  |
| EPHB4   | 0 | 0 | no  |
| EPHX2   | 0 | 1 | no  |
| EPM2A   | 0 | 1 | yes |
| EPO     | 0 | 0 | no  |
| EPOR    | 0 | 0 | no  |
| EPRS1   | 0 | 1 | no  |
| EPS8    | 1 | 1 | no  |
| EPS8L2  | 0 | 0 | no  |
| EPS8L3  | 0 | 2 | no  |
| EPX     | 0 | 0 | no  |
| ERAL1   | 0 | 1 | no  |
| ERBB2   | 0 | 0 | no  |
| ERBB3   | 0 | 0 | no  |
| ERBB4   | 1 | 3 | yes |
| ERCC1   | 0 | 0 | no  |
| ERCC2   | 0 | 0 | no  |
| ERCC3   | 0 | 1 | yes |
| ERCC4   | 0 | 0 | no  |
| ERCC5   | 0 | 0 | no  |
| ERCC6   | 2 | 0 | yes |
| ERCC6L2 | 0 | 1 | no  |
| ERCC8   | 0 | 1 | no  |
| ERF     | 0 | 0 | no  |
| ERGIC1  | 0 | 1 | no  |
| ERLIN1  | 0 | 0 | no  |
| ERLIN2  | 0 | 0 | no  |
| ERMAP   | 0 | 0 | yes |
| ERMARD  | 0 | 0 | no  |
| ESAM    | 0 | 0 | yes |
| ESCO2   | 0 | 0 | no  |
| ESPN    | 1 | 0 | yes |
| ESR1    | 0 | 1 | no  |

|        |   |    |     |
|--------|---|----|-----|
| ESR2   | 0 | 0  | no  |
| ESRP1  | 0 | 0  | no  |
| ESRRB  | 0 | 0  | no  |
| ETFA   | 1 | 0  | yes |
| ETFB   | 0 | 0  | no  |
| ETFDH  | 0 | 0  | no  |
| ETHE1  | 0 | 0  | no  |
| ETV6   | 0 | 3  | no  |
| EVC    | 0 | 0  | no  |
| EVC2   | 0 | 0  | no  |
| EWSR1  | 0 | 1  | no  |
| EXOC2  | 1 | 1  | yes |
| EXOC6B | 1 | 1  | no  |
| EXOC7  | 0 | 1  | no  |
| EXOC8  | 0 | 0  | no  |
| EXOSC1 | 0 | 0  | yes |
| EXOSC2 | 0 | 0  | no  |
| EXOSC3 | 0 | 0  | no  |
| EXOSC5 | 0 | 0  | no  |
| EXOSC8 | 0 | 0  | no  |
| EXOSC9 | 0 | 0  | no  |
| EXPH5  | 0 | 1  | no  |
| EXT1   | 1 | 2  | no  |
| EXT2   | 0 | 0  | no  |
| EXTL3  | 1 | 0  | no  |
| EYA1   | 1 | 1  | no  |
| EYA4   | 0 | 0  | no  |
| EYS    | 8 | 56 | yes |
| EZH2   | 0 | 0  | no  |
| F10    | 0 | 3  | no  |
| F11    | 0 | 0  | no  |
| F12    | 0 | 0  | no  |
| F13A1  | 2 | 0  | no  |
| F13B   | 0 | 0  | no  |
| F2     | 0 | 0  | no  |
| F5     | 0 | 1  | no  |
| F7     | 0 | 2  | no  |
| FA2H   | 0 | 0  | no  |
| FAAH   | 0 | 0  | no  |
| FADD   | 0 | 0  | no  |
| FAH    | 0 | 0  | no  |

|          |     |     |     |
|----------|-----|-----|-----|
| FAM111A  | 0   | 1   | no  |
| FAM111B  | 0   | 1   | yes |
| FAM149B1 | 0   | 0   | yes |
| FAM161A  | 0   | 0   | no  |
| FAM20A   | 0   | 2   | no  |
| FAM20C   | 100 | 100 | no  |
| FAM83H   | 1   | 7   | no  |
| FAN1     | 0   | 0   | yes |
| FANCA    | 0   | 0   | no  |
| FANCC    | 0   | 1   | yes |
| FANCD2   | 0   | 0   | yes |
| FANCE    | 1   | 0   | no  |
| FANCF    | 0   | 0   | no  |
| FANCG    | 0   | 1   | no  |
| FANCI    | 0   | 0   | no  |
| FANCL    | 0   | 0   | no  |
| FANCM    | 0   | 0   | no  |
| FAR1     | 0   | 0   | yes |
| FARS2    | 0   | 1   | yes |
| FARSA    | 0   | 0   | no  |
| FARSB    | 0   | 0   | yes |
| FAS      | 0   | 0   | no  |
| FASLG    | 0   | 1   | no  |
| FASTKD2  | 0   | 0   | no  |
| FAT2     | 0   | 0   | no  |
| FAT4     | 0   | 0   | no  |
| FBLN1    | 0   | 2   | no  |
| FBLN5    | 0   | 0   | no  |
| FBN1     | 0   | 2   | no  |
| FBN2     | 0   | 0   | no  |
| FBP1     | 0   | 2   | no  |
| FBP2     | 0   | 2   | no  |
| FBXL3    | 0   | 0   | no  |
| FBXL4    | 0   | 0   | yes |
| FBXO11   | 0   | 1   | yes |
| FBXO28   | 0   | 0   | no  |
| FBXO31   | 0   | 1   | no  |
| FBXO38   | 0   | 0   | no  |
| FBXO43   | 0   | 0   | no  |
| FBXO7    | 0   | 0   | no  |
| FBXW11   | 0   | 0   | yes |

|        |    |    |     |
|--------|----|----|-----|
| FBXW7  | 0  | 1  | no  |
| FCGR1A | 21 | 61 | yes |
| FCGR2A | 69 | 9  | yes |
| FCGR2B | 60 | 7  | yes |
| FCGR3A | 46 | 8  | yes |
| FCHO1  | 0  | 0  | no  |
| FCN3   | 0  | 0  | no  |
| FCSK   | 0  | 0  | no  |
| FDFT1  | 0  | 0  | yes |
| FDPS   | 0  | 1  | no  |
| FDX2   | 0  | 0  | no  |
| FDXR   | 0  | 0  | no  |
| FECH   | 0  | 0  | no  |
| FERMT1 | 0  | 0  | no  |
| FERMT3 | 0  | 0  | no  |
| FEZF1  | 0  | 0  | no  |
| FFAR4  | 0  | 0  | no  |
| FGA    | 0  | 0  | no  |
| FGB    | 0  | 0  | no  |
| FGD4   | 0  | 1  | no  |
| FGF10  | 0  | 0  | no  |
| FGF12  | 0  | 0  | no  |
| FGF14  | 0  | 1  | yes |
| FGF17  | 0  | 1  | no  |
| FGF20  | 0  | 0  | no  |
| FGF23  | 0  | 0  | no  |
| FGF3   | 0  | 0  | no  |
| FGF5   | 0  | 0  | no  |
| FGF8   | 0  | 0  | no  |
| FGF9   | 0  | 0  | no  |
| FGFR1  | 0  | 0  | no  |
| FGFR2  | 0  | 0  | no  |
| FGFR3  | 0  | 0  | yes |
| FGFR4  | 1  | 0  | no  |
| FGG    | 0  | 0  | no  |
| FH     | 0  | 0  | no  |
| FHOD3  | 0  | 0  | no  |
| FIBP   | 0  | 0  | yes |
| FIG4   | 0  | 1  | no  |
| FIGLA  | 0  | 0  | no  |
| FITM2  | 0  | 0  | no  |

|          |    |   |     |
|----------|----|---|-----|
| FKBP10   | 0  | 0 | no  |
| FKBP14   | 0  | 0 | no  |
| FKBP5    | 1  | 0 | no  |
| FKBP6    | 16 | 0 | yes |
| FKRP     | 0  | 0 | no  |
| FKTN     | 1  | 0 | no  |
| FLAD1    | 0  | 0 | no  |
| FLCN     | 0  | 0 | no  |
| FLG      | 0  | 0 | yes |
| FLG2     | 0  | 0 | no  |
| FLI1     | 0  | 0 | no  |
| FLNB     | 0  | 0 | no  |
| FLNC     | 0  | 1 | yes |
| FLRT3    | 0  | 1 | no  |
| FLT3     | 0  | 1 | no  |
| FLT4     | 0  | 0 | no  |
| FLVCR1   | 0  | 0 | no  |
| FLVCR2   | 0  | 0 | no  |
| FMN2     | 0  | 0 | yes |
| FMO3     | 0  | 0 | no  |
| FN1      | 0  | 0 | no  |
| FNIP1    | 0  | 1 | yes |
| FOCAD    | 0  | 0 | no  |
| FOLR1    | 0  | 0 | no  |
| FOXC1    | 0  | 0 | no  |
| FOXC2    | 0  | 0 | no  |
| FOXD3    | 0  | 0 | no  |
| FOXE1    | 0  | 0 | no  |
| FOXE3    | 0  | 0 | no  |
| FOXF1    | 0  | 0 | no  |
| FOXG1    | 0  | 0 | no  |
| FOXI1    | 0  | 0 | no  |
| FOXI3    | 0  | 0 | no  |
| FOXJ1    | 0  | 0 | no  |
| FOXL2    | 0  | 0 | no  |
| FOXN1    | 0  | 1 | no  |
| FOXO1    | 0  | 0 | yes |
| FOXP1    | 0  | 1 | no  |
| FOXP2    | 1  | 0 | no  |
| FOXRED1  | 0  | 0 | no  |
| FRA10AC1 | 0  | 0 | no  |

|        |    |    |     |
|--------|----|----|-----|
| FRAS1  | 4  | 2  | yes |
| FREM1  | 0  | 0  | yes |
| FREM2  | 0  | 1  | no  |
| FRMD4A | 5  | 1  | no  |
| FRMD5  | 0  | 1  | yes |
| FRRS1L | 0  | 0  | no  |
| FRZB   | 0  | 1  | no  |
| FSCN2  | 0  | 0  | yes |
| FSHB   | 0  | 0  | no  |
| FSHR   | 1  | 0  | no  |
| FSIP2  | 0  | 0  | no  |
| FTCD   | 0  | 0  | no  |
| FTH1   | 0  | 0  | no  |
| FTL    | 0  | 0  | no  |
| FTO    | 0  | 0  | no  |
| FUCA1  | 0  | 0  | no  |
| FUS    | 0  | 0  | no  |
| FUT1   | 0  | 0  | no  |
| FUT2   | 0  | 0  | no  |
| FUT3   | 0  | 0  | yes |
| FUT6   | 0  | 0  | yes |
| FUT8   | 34 | 30 | no  |
| FUZ    | 0  | 1  | no  |
| FXN    | 0  | 0  | yes |
| FXR1   | 0  | 0  | yes |
| FXYD2  | 0  | 0  | no  |
| FYB1   | 0  | 0  | no  |
| FYCO1  | 0  | 1  | no  |
| FZD2   | 0  | 0  | no  |
| FZD4   | 0  | 0  | no  |
| FZD6   | 0  | 0  | no  |
| FZR1   | 0  | 0  | no  |
| G6PC1  | 0  | 1  | no  |
| G6PC3  | 0  | 0  | no  |
| GAA    | 0  | 0  | no  |
| GAB1   | 0  | 1  | yes |
| GABBR2 | 2  | 1  | yes |
| GABRA1 | 0  | 0  | no  |
| GABRA2 | 0  | 0  | no  |
| GABRA5 | 0  | 1  | no  |
| GABRB1 | 0  | 1  | no  |

|         |   |   |     |
|---------|---|---|-----|
| GABRB2  | 0 | 0 | yes |
| GABRB3  | 0 | 1 | no  |
| GABRD   | 0 | 0 | no  |
| GABRG2  | 0 | 0 | no  |
| GAD1    | 0 | 0 | no  |
| GAL     | 0 | 0 | no  |
| GALC    | 0 | 1 | yes |
| GALE    | 0 | 0 | no  |
| GALK1   | 0 | 0 | no  |
| GALM    | 4 | 1 | yes |
| GALNS   | 0 | 0 | no  |
| GALNT12 | 0 | 0 | no  |
| GALNT2  | 0 | 0 | no  |
| GALNT3  | 0 | 1 | no  |
| GALT    | 0 | 0 | no  |
| GAMT    | 0 | 0 | no  |
| GAN     | 0 | 0 | no  |
| GANAB   | 0 | 0 | yes |
| GARS1   | 0 | 0 | no  |
| GAS2L2  | 0 | 0 | no  |
| GAS8    | 0 | 0 | no  |
| GATA2   | 0 | 0 | no  |
| GATA3   | 0 | 0 | no  |
| GATA4   | 1 | 1 | yes |
| GATA5   | 0 | 0 | no  |
| GATA6   | 0 | 0 | no  |
| GATAD1  | 0 | 0 | no  |
| GATAD2B | 0 | 0 | no  |
| GATB    | 0 | 0 | no  |
| GATC    | 0 | 0 | yes |
| GATM    | 0 | 0 | no  |
| GBA1    | 0 | 0 | yes |
| GBA2    | 0 | 1 | no  |
| GBE1    | 0 | 0 | yes |
| GBF1    | 0 | 0 | no  |
| GCDH    | 0 | 0 | no  |
| GCGR    | 0 | 0 | no  |
| GCH1    | 0 | 0 | no  |
| GCK     | 0 | 0 | no  |
| GCKR    | 0 | 0 | no  |
| GCLC    | 0 | 0 | no  |

|        |   |   |     |
|--------|---|---|-----|
| GCLM   | 0 | 0 | no  |
| GCM2   | 0 | 0 | no  |
| GCNT2  | 0 | 0 | no  |
| GCSH   | 0 | 0 | no  |
| GDAP1  | 4 | 1 | no  |
| GDAP2  | 0 | 1 | no  |
| GDF1   | 0 | 1 | no  |
| GDF11  | 0 | 0 | no  |
| GDF2   | 0 | 0 | no  |
| GDF3   | 0 | 1 | no  |
| GDF5   | 0 | 0 | no  |
| GDF6   | 0 | 0 | no  |
| GDF9   | 0 | 0 | no  |
| GDNF   | 0 | 0 | no  |
| GEMIN4 | 0 | 7 | no  |
| GEMIN5 | 0 | 0 | no  |
| GET3   | 0 | 1 | no  |
| GET4   | 0 | 0 | no  |
| GFAP   | 0 | 0 | no  |
| GFER   | 0 | 0 | yes |
| GFI1   | 0 | 0 | no  |
| GFI1B  | 0 | 1 | no  |
| GFM1   | 0 | 1 | no  |
| GFM2   | 0 | 0 | no  |
| GFPT1  | 0 | 0 | yes |
| GFRA1  | 0 | 0 | no  |
| GGCX   | 0 | 0 | yes |
| GGN    | 0 | 0 | no  |
| GGPS1  | 0 | 0 | no  |
| GGT1   | 9 | 5 | yes |
| GH1    | 0 | 0 | yes |
| GHR    | 2 | 2 | yes |
| GHRH   | 0 | 1 | no  |
| GHRHR  | 0 | 0 | no  |
| GHRL   | 0 | 0 | no  |
| GHSR   | 0 | 0 | no  |
| GIGYF2 | 0 | 0 | no  |
| GIMAP5 | 0 | 0 | yes |
| GINS1  | 0 | 0 | no  |
| GIPC1  | 0 | 1 | no  |
| GIPC3  | 0 | 0 | no  |



|          |   |   |     |
|----------|---|---|-----|
| GJA1     | 0 | 0 | yes |
| GJA3     | 0 | 0 | no  |
| GJA5     | 0 | 0 | no  |
| GJA8     | 0 | 0 | yes |
| GJB2     | 0 | 0 | no  |
| GJB3     | 0 | 0 | no  |
| GJB4     | 0 | 0 | no  |
| GJB6     | 0 | 0 | no  |
| GJC2     | 0 | 1 | no  |
| GLB1     | 0 | 0 | no  |
| GLCCI1   | 0 | 0 | no  |
| GLDC     | 1 | 0 | no  |
| GLDN     | 0 | 0 | no  |
| GLE1     | 0 | 0 | no  |
| GLI1     | 0 | 0 | no  |
| GLI2     | 0 | 0 | no  |
| GLI3     | 0 | 1 | yes |
| GLIS2    | 0 | 0 | no  |
| GLIS3    | 0 | 0 | no  |
| GLMN     | 0 | 0 | no  |
| GLRA1    | 0 | 1 | no  |
| GLRB     | 0 | 1 | no  |
| GLRX5    | 0 | 0 | no  |
| GLS      | 0 | 0 | no  |
| GLUD1    | 0 | 0 | yes |
| GLUL     | 1 | 0 | no  |
| GLYCTK   | 0 | 0 | no  |
| GM2A     | 0 | 0 | no  |
| GMNN     | 0 | 0 | no  |
| GMPPA    | 0 | 1 | no  |
| GMPPB    | 0 | 0 | no  |
| GNA11    | 0 | 0 | no  |
| GNAI1    | 0 | 0 | no  |
| GNAI2    | 0 | 0 | no  |
| GNAI3    | 0 | 3 | no  |
| GNAL     | 0 | 1 | no  |
| GNAO1    | 0 | 4 | no  |
| GNAQ     | 0 | 0 | yes |
| GNAS     | 0 | 0 | no  |
| GNAS-AS1 | 0 | 0 | no  |
| GNAT1    | 0 | 0 | no  |

|         |   |    |     |
|---------|---|----|-----|
| GNAT2   | 0 | 2  | no  |
| GNB1    | 0 | 0  | no  |
| GNB2    | 0 | 0  | no  |
| GNB3    | 0 | 0  | no  |
| GNB4    | 1 | 0  | yes |
| GNB5    | 0 | 1  | no  |
| GNE     | 0 | 2  | no  |
| GNMT    | 1 | 0  | yes |
| GNPAT   | 0 | 0  | yes |
| GNPNAT1 | 0 | 0  | yes |
| GNPTAB  | 0 | 0  | no  |
| GNPTG   | 0 | 0  | no  |
| GNRH1   | 0 | 1  | yes |
| GNRHR   | 0 | 0  | no  |
| GNS     | 0 | 2  | no  |
| GOLGA2  | 0 | 0  | yes |
| GON7    | 0 | 0  | no  |
| GORAB   | 0 | 0  | no  |
| GOSR2   | 0 | 1  | yes |
| GOT1    | 0 | 2  | no  |
| GOT2    | 0 | 0  | yes |
| GP1BA   | 0 | 1  | no  |
| GP1BB   | 0 | 2  | no  |
| GP6     | 0 | 0  | no  |
| GP9     | 0 | 0  | no  |
| GPAA1   | 2 | 10 | no  |
| GPC6    | 2 | 2  | no  |
| GPD1    | 0 | 0  | no  |
| GPD1L   | 1 | 0  | no  |
| GPD2    | 0 | 0  | yes |
| GPHN    | 3 | 0  | yes |
| GPI     | 0 | 0  | no  |
| GPIHBP1 | 0 | 3  | yes |
| GNPMB   | 0 | 0  | no  |
| GPR161  | 0 | 0  | no  |
| GPR179  | 0 | 0  | yes |
| GPR68   | 0 | 0  | no  |
| GPR88   | 0 | 0  | no  |
| GPRC5B  | 0 | 0  | no  |
| GPSM2   | 0 | 4  | no  |
| GPT2    | 0 | 0  | no  |

|         |     |    |     |
|---------|-----|----|-----|
| GPX1    | 0   | 1  | no  |
| GPX4    | 0   | 0  | no  |
| GRAP    | 3   | 34 | yes |
| GREB1L  | 2   | 3  | no  |
| GREM2   | 0   | 1  | no  |
| GRHL2   | 0   | 0  | yes |
| GRHL3   | 0   | 0  | no  |
| GRHPR   | 0   | 1  | no  |
| GRIA1   | 2   | 0  | no  |
| GRIA2   | 0   | 0  | no  |
| GRIA4   | 0   | 2  | no  |
| GRID2   | 24  | 17 | no  |
| GRIK2   | 1   | 2  | no  |
| GRIN1   | 0   | 0  | no  |
| GRIN2A  | 0   | 1  | no  |
| GRIN2B  | 0   | 1  | no  |
| GRIN2D  | 0   | 0  | no  |
| GRIP1   | 0   | 0  | no  |
| GRK1    | 100 | 97 | yes |
| GRM1    | 0   | 0  | no  |
| GRM6    | 0   | 0  | no  |
| GRM7    | 0   | 3  | yes |
| GRN     | 0   | 0  | no  |
| GRXCR1  | 0   | 0  | no  |
| GRXCR2  | 0   | 0  | no  |
| GSC     | 0   | 0  | no  |
| GSDME   | 0   | 0  | no  |
| GSN     | 0   | 0  | no  |
| GSR     | 0   | 0  | no  |
| GSS     | 0   | 0  | no  |
| GSTZ1   | 0   | 0  | no  |
| GSX2    | 0   | 0  | no  |
| GTF2E2  | 0   | 0  | no  |
| GTF2H5  | 0   | 0  | no  |
| GTPBP2  | 0   | 0  | no  |
| GTPBP3  | 0   | 0  | no  |
| GUCA1A  | 0   | 0  | no  |
| GUCA1B  | 0   | 0  | no  |
| GUCY1A1 | 0   | 0  | no  |
| GUCY2C  | 0   | 0  | no  |
| GUCY2D  | 0   | 0  | no  |

|        |    |   |     |
|--------|----|---|-----|
| GUF1   | 0  | 1 | no  |
| GUSB   | 1  | 1 | yes |
| GYG1   | 0  | 0 | yes |
| GYP A  | 15 | 5 | yes |
| GYP B  | 7  | 1 | yes |
| GYP C  | 0  | 2 | yes |
| GYS1   | 0  | 0 | no  |
| GYS2   | 0  | 1 | no  |
| GZF1   | 0  | 0 | no  |
| H1-4   | 0  | 0 | no  |
| H3-3A  | 0  | 1 | no  |
| H3-3B  | 0  | 0 | yes |
| H4C11  | 1  | 1 | yes |
| H4C3   | 0  | 0 | no  |
| H4C5   | 0  | 0 | no  |
| H4C9   | 0  | 1 | no  |
| H6PD   | 0  | 0 | no  |
| HAAO   | 0  | 0 | no  |
| HABP2  | 0  | 0 | no  |
| HACD1  | 0  | 0 | no  |
| HACE1  | 3  | 1 | no  |
| HADH   | 0  | 1 | no  |
| HADHA  | 0  | 1 | no  |
| HADHB  | 0  | 1 | no  |
| HAGH   | 0  | 0 | no  |
| HAL    | 0  | 0 | no  |
| HAMP   | 0  | 2 | no  |
| HARS1  | 0  | 0 | yes |
| HARS2  | 0  | 0 | no  |
| HAVCR2 | 0  | 0 | no  |
| HAX1   | 0  | 0 | no  |
| HBA1   | 0  | 1 | yes |
| HBA2   | 0  | 1 | yes |
| HBB    | 0  | 0 | no  |
| HBD    | 0  | 0 | no  |
| HBEGF  | 0  | 0 | no  |
| HBG1   | 0  | 0 | yes |
| HBG2   | 0  | 0 | yes |
| HCK    | 0  | 2 | no  |
| HCN1   | 5  | 6 | no  |
| HCN2   | 0  | 0 | yes |

|          |    |    |     |
|----------|----|----|-----|
| HCN4     | 0  | 0  | no  |
| HCRT     | 0  | 0  | no  |
| HDAC4    | 1  | 0  | yes |
| HDAC9    | 0  | 1  | no  |
| HDC      | 0  | 0  | no  |
| HEATR3   | 0  | 0  | no  |
| HECTD4   | 0  | 1  | no  |
| HECW2    | 0  | 1  | no  |
| HELLS    | 0  | 0  | no  |
| HEPACAM  | 0  | 0  | no  |
| HEPHL1   | 2  | 0  | no  |
| HERC1    | 0  | 0  | no  |
| HERC2    | 99 | 99 | yes |
| HES7     | 0  | 0  | no  |
| HESX1    | 0  | 0  | no  |
| HEXA     | 0  | 0  | no  |
| HEXB     | 0  | 0  | no  |
| HFE      | 0  | 0  | no  |
| HFM1     | 0  | 0  | yes |
| HGD      | 0  | 0  | no  |
| HGF      | 0  | 0  | no  |
| HGSNAT   | 0  | 0  | no  |
| HHAT     | 0  | 2  | no  |
| HIBCH    | 0  | 1  | no  |
| HID1     | 0  | 0  | no  |
| HIKESHI  | 0  | 1  | no  |
| HINT1    | 0  | 0  | no  |
| HIVEP2   | 0  | 2  | no  |
| HJV      | 0  | 0  | no  |
| HK1      | 0  | 1  | no  |
| HKDC1    | 0  | 2  | no  |
| HLA-A    | 16 | 0  | yes |
| HLA-B    | 0  | 1  | yes |
| HLA-C    | 0  | 0  | yes |
| HLA-DPB1 | 0  | 0  | no  |
| HLA-DQA1 | 76 | 50 | no  |
| HLA-DQB1 | 47 | 3  | no  |
| HLA-DRB1 | 49 | 37 | yes |
| HLA-G    | 2  | 0  | yes |
| HLCS     | 1  | 0  | no  |
| HMBS     | 0  | 0  | no  |

|           |   |   |     |
|-----------|---|---|-----|
| HMCN1     | 2 | 2 | no  |
| HMGA1     | 0 | 0 | yes |
| HMGA2     | 0 | 0 | no  |
| HMGCL     | 0 | 0 | no  |
| HMGCR     | 0 | 0 | no  |
| HMGCS2    | 0 | 0 | no  |
| HMMR      | 0 | 0 | no  |
| HMOX1     | 0 | 0 | no  |
| HMX1      | 1 | 9 | no  |
| HNF1A     | 0 | 0 | no  |
| HNF1B     | 0 | 0 | no  |
| HNF4A     | 0 | 0 | no  |
| HNMT      | 0 | 0 | no  |
| HNRNPA1   | 0 | 0 | yes |
| HNRNPA2B1 | 0 | 0 | yes |
| HNRNPDL   | 0 | 0 | yes |
| HNRNPH1   | 1 | 0 | yes |
| HNRNPK    | 0 | 0 | yes |
| HNRNPR    | 0 | 0 | yes |
| HNRNPU    | 0 | 0 | no  |
| HOGA1     | 0 | 0 | no  |
| HOMER2    | 1 | 0 | yes |
| HOXA1     | 0 | 1 | no  |
| HOXA11    | 0 | 1 | no  |
| HOXA13    | 0 | 1 | no  |
| HOXA2     | 0 | 1 | no  |
| HOXB1     | 0 | 0 | no  |
| HOXB13    | 0 | 0 | no  |
| HOXC13    | 0 | 0 | no  |
| HOXD10    | 0 | 0 | no  |
| HOXD13    | 0 | 0 | no  |
| HP        | 4 | 0 | yes |
| HPCA      | 0 | 0 | no  |
| HPD       | 0 | 0 | no  |
| HPDL      | 0 | 0 | no  |
| HPGD      | 0 | 0 | no  |
| HPS1      | 0 | 1 | yes |
| HPS3      | 0 | 0 | yes |
| HPS4      | 0 | 0 | no  |
| HPS5      | 0 | 0 | yes |
| HPS6      | 0 | 0 | no  |

|          |     |     |     |
|----------|-----|-----|-----|
| HPSE2    | 5   | 3   | yes |
| HR       | 0   | 1   | no  |
| HRAS     | 0   | 0   | no  |
| HRG      | 0   | 0   | no  |
| HRURF    | 0   | 1   | no  |
| HS2ST1   | 0   | 0   | no  |
| HS3ST6   | 0   | 0   | no  |
| HS6ST1   | 0   | 0   | yes |
| HSCB     | 0   | 0   | no  |
| HSD11B1  | 0   | 0   | no  |
| HSD11B2  | 0   | 0   | no  |
| HSD17B13 | 0   | 0   | no  |
| HSD17B3  | 2   | 2   | no  |
| HSD17B4  | 0   | 0   | no  |
| HSD3B2   | 0   | 0   | no  |
| HSD3B7   | 0   | 0   | no  |
| HSF2BP   | 1   | 1   | yes |
| HSF4     | 0   | 0   | yes |
| HSPA9    | 0   | 0   | no  |
| HSPB1    | 0   | 0   | no  |
| HSPB3    | 0   | 0   | no  |
| HSPB8    | 0   | 0   | yes |
| HSPD1    | 0   | 0   | yes |
| HSPG2    | 0   | 1   | no  |
| HTR1A    | 0   | 0   | no  |
| HTR2A    | 0   | 0   | no  |
| HTRA1    | 0   | 0   | no  |
| HTRA2    | 0   | 0   | no  |
| HTT      | 0   | 0   | no  |
| HYAL1    | 0   | 0   | no  |
| HYCC1    | 0   | 0   | no  |
| HYDIN    | 100 | 100 | yes |
| HYLS1    | 0   | 0   | no  |
| HYOU1    | 0   | 0   | no  |
| IARS1    | 1   | 1   | yes |
| IARS2    | 1   | 1   | no  |
| IBA57    | 0   | 1   | no  |
| ICAM1    | 0   | 0   | no  |
| ICAM4    | 0   | 0   | no  |
| ICOS     | 0   | 0   | no  |
| IDH1     | 0   | 1   | no  |

|         |    |    |     |
|---------|----|----|-----|
| IDH2    | 0  | 0  | yes |
| IDH3A   | 0  | 0  | no  |
| IDH3B   | 0  | 0  | no  |
| IDUA    | 0  | 1  | no  |
| IER3IP1 | 0  | 1  | no  |
| IFIH1   | 0  | 1  | no  |
| IFITM3  | 1  | 1  | yes |
| IFITM5  | 0  | 0  | yes |
| IFNA1   | 0  | 0  | yes |
| IFNAR1  | 0  | 0  | no  |
| IFNAR2  | 0  | 0  | no  |
| IFNG    | 0  | 2  | no  |
| IFNGR1  | 0  | 0  | no  |
| IFNGR2  | 0  | 0  | no  |
| IFNL3   | 0  | 0  | yes |
| IFT122  | 0  | 0  | yes |
| IFT140  | 0  | 0  | no  |
| IFT172  | 0  | 0  | no  |
| IFT27   | 0  | 0  | no  |
| IFT43   | 0  | 0  | no  |
| IFT52   | 1  | 0  | no  |
| IFT56   | 0  | 0  | no  |
| IFT57   | 0  | 0  | no  |
| IFT74   | 0  | 1  | no  |
| IFT80   | 0  | 0  | no  |
| IFT81   | 0  | 0  | no  |
| IGF1    | 0  | 0  | no  |
| IGF1R   | 0  | 1  | no  |
| IGF2    | 0  | 0  | no  |
| IGF2BP2 | 0  | 0  | yes |
| IGF2R   | 0  | 0  | yes |
| IGFALS  | 0  | 0  | no  |
| IGFBP7  | 0  | 0  | no  |
| IGHG2   | 15 | 25 | yes |
| IGHM    | 15 | 41 | yes |
| IGHMBP2 | 0  | 0  | no  |
| IGKC    | 23 | 29 | no  |
| IGLL1   | 0  | 1  | yes |
| IGSF3   | 12 | 0  | yes |
| IHH     | 0  | 0  | no  |
| IKBKB   | 0  | 0  | no  |



|         |   |   |     |
|---------|---|---|-----|
| IKZF1   | 0 | 0 | no  |
| IKZF3   | 0 | 0 | no  |
| IKZF5   | 0 | 0 | no  |
| IL10    | 0 | 0 | no  |
| IL10RA  | 0 | 0 | no  |
| IL10RB  | 0 | 0 | no  |
| IL11RA  | 0 | 0 | no  |
| IL12B   | 0 | 0 | no  |
| IL12RB1 | 0 | 0 | no  |
| IL13    | 0 | 0 | no  |
| IL17F   | 0 | 0 | no  |
| IL17RA  | 0 | 0 | no  |
| IL17RC  | 0 | 0 | no  |
| IL17RD  | 0 | 0 | no  |
| IL18BP  | 0 | 0 | no  |
| IL1B    | 0 | 0 | no  |
| IL1R1   | 0 | 1 | no  |
| IL1RN   | 0 | 0 | no  |
| IL21    | 0 | 0 | no  |
| IL21R   | 0 | 0 | no  |
| IL23R   | 0 | 1 | no  |
| IL2RA   | 0 | 0 | no  |
| IL2RB   | 0 | 0 | no  |
| IL31RA  | 1 | 0 | no  |
| IL36RN  | 0 | 0 | no  |
| IL37    | 0 | 0 | no  |
| IL4R    | 1 | 0 | no  |
| IL6     | 0 | 0 | no  |
| IL6R    | 0 | 0 | no  |
| IL6ST   | 0 | 0 | yes |
| IL7     | 0 | 1 | yes |
| IL7R    | 0 | 0 | no  |
| ILDR1   | 0 | 1 | no  |
| IMPA1   | 0 | 0 | yes |
| IMPDH1  | 0 | 0 | no  |
| IMPDH2  | 0 | 1 | no  |
| IMPG1   | 0 | 1 | no  |
| IMPG2   | 0 | 0 | no  |
| INAVA   | 0 | 0 | yes |
| INF2    | 0 | 2 | no  |
| ING1    | 0 | 1 | no  |

|         |   |   |     |
|---------|---|---|-----|
| INPP5E  | 0 | 0 | no  |
| INPP5K  | 0 | 2 | no  |
| INPPL1  | 0 | 0 | no  |
| INS     | 0 | 0 | no  |
| INSL3   | 0 | 0 | no  |
| INSR    | 0 | 0 | no  |
| INTS1   | 0 | 0 | no  |
| INTS11  | 0 | 0 | no  |
| INTS8   | 0 | 0 | no  |
| INTU    | 0 | 0 | no  |
| INVS    | 0 | 0 | no  |
| IPO8    | 0 | 0 | no  |
| IQCB1   | 0 | 0 | no  |
| IQCE    | 0 | 1 | no  |
| IQCN    | 0 | 0 | no  |
| IQSEC1  | 0 | 0 | yes |
| IRAK3   | 0 | 2 | no  |
| IRAK4   | 0 | 0 | yes |
| IREB2   | 0 | 0 | no  |
| IRF1    | 0 | 0 | no  |
| IRF2BP2 | 0 | 0 | no  |
| IRF2BPL | 0 | 0 | no  |
| IRF3    | 0 | 1 | yes |
| IRF4    | 0 | 0 | no  |
| IRF5    | 0 | 0 | no  |
| IRF6    | 0 | 0 | yes |
| IRF7    | 0 | 0 | no  |
| IRF8    | 0 | 0 | no  |
| IRF9    | 0 | 0 | no  |
| IRGM    | 0 | 0 | yes |
| IRS1    | 0 | 1 | no  |
| IRS2    | 0 | 1 | no  |
| IRX5    | 0 | 0 | no  |
| ISCA1   | 0 | 0 | yes |
| ISCA2   | 0 | 0 | no  |
| ISCU    | 0 | 0 | no  |
| ISG15   | 0 | 0 | no  |
| ITCH    | 0 | 1 | yes |
| ITGA2B  | 0 | 0 | yes |
| ITGA3   | 0 | 0 | no  |
| ITGA6   | 0 | 0 | no  |

|          |    |    |     |
|----------|----|----|-----|
| ITGA7    | 0  | 0  | no  |
| ITGA8    | 1  | 1  | no  |
| ITGB2    | 0  | 1  | yes |
| ITGB3    | 0  | 0  | no  |
| ITGB4    | 0  | 0  | no  |
| ITGB6    | 0  | 2  | no  |
| ITK      | 0  | 0  | no  |
| ITM2B    | 0  | 1  | no  |
| ITPA     | 0  | 0  | no  |
| ITPR1    | 0  | 0  | no  |
| ITPR2    | 0  | 2  | no  |
| ITPR3    | 0  | 0  | no  |
| IVD      | 0  | 0  | no  |
| IVNS1ABP | 0  | 0  | no  |
| IYD      | 0  | 0  | no  |
| JAG1     | 0  | 0  | no  |
| JAG2     | 2  | 7  | no  |
| JAGN1    | 0  | 0  | no  |
| JAK1     | 0  | 0  | no  |
| JAK2     | 0  | 1  | no  |
| JAK3     | 0  | 0  | no  |
| JAM2     | 0  | 0  | no  |
| JAM3     | 0  | 4  | yes |
| JARID2   | 0  | 0  | no  |
| JPH1     | 0  | 0  | no  |
| JPH2     | 0  | 1  | no  |
| JPH3     | 0  | 1  | no  |
| JUP      | 0  | 0  | no  |
| KANK1    | 2  | 0  | no  |
| KANK2    | 0  | 0  | no  |
| KANSL1   | 30 | 56 | yes |
| KARS1    | 0  | 0  | yes |
| KAT5     | 0  | 0  | no  |
| KAT6A    | 0  | 0  | no  |
| KAT6B    | 0  | 1  | no  |
| KAT8     | 0  | 0  | no  |
| KATNB1   | 0  | 0  | no  |
| KATNIP   | 0  | 1  | no  |
| KBTBD13  | 0  | 1  | no  |
| KCNA1    | 0  | 1  | no  |
| KCNA2    | 0  | 0  | no  |

|          |    |    |     |
|----------|----|----|-----|
| KCNA4    | 0  | 0  | no  |
| KCNA5    | 0  | 0  | no  |
| KCNB1    | 0  | 2  | no  |
| KCNC1    | 0  | 0  | no  |
| KCNC2    | 0  | 1  | no  |
| KCNC3    | 0  | 2  | no  |
| KCND3    | 0  | 1  | no  |
| KCNE1    | 1  | 0  | yes |
| KCNE2    | 0  | 0  | yes |
| KCNE3    | 0  | 0  | no  |
| KCNH1    | 0  | 0  | yes |
| KCNH2    | 0  | 0  | no  |
| KCNJ1    | 0  | 0  | no  |
| KCNJ10   | 0  | 0  | no  |
| KCNJ11   | 0  | 0  | no  |
| KCNJ13   | 0  | 0  | no  |
| KCNJ16   | 0  | 0  | no  |
| KCNJ18   | 63 | 44 | yes |
| KCNJ2    | 0  | 0  | no  |
| KCNJ5    | 1  | 0  | no  |
| KCNJ6    | 0  | 1  | no  |
| KCNK18   | 0  | 0  | no  |
| KCNK3    | 0  | 0  | no  |
| KCNK4    | 0  | 0  | yes |
| KCNK9    | 0  | 0  | no  |
| KCNMA1   | 0  | 0  | no  |
| KCNMB1   | 0  | 0  | no  |
| KCNN2    | 2  | 1  | no  |
| KCNN3    | 0  | 1  | no  |
| KCNN4    | 0  | 0  | no  |
| KCNQ1    | 0  | 1  | no  |
| KCNQ1OT1 | 0  | 0  | no  |
| KCNQ2    | 0  | 0  | no  |
| KCNQ3    | 1  | 0  | yes |
| KCNQ4    | 0  | 0  | no  |
| KCNQ5    | 6  | 29 | yes |
| KCNT1    | 0  | 0  | no  |
| KCNT2    | 0  | 0  | no  |
| KCNU1    | 0  | 0  | no  |
| KCNV2    | 0  | 0  | no  |
| KCTD1    | 1  | 0  | yes |

|           |    |   |     |
|-----------|----|---|-----|
| KCTD17    | 0  | 0 | no  |
| KCTD7     | 0  | 1 | yes |
| KDELR2    | 0  | 0 | no  |
| KDF1      | 0  | 0 | no  |
| KDM1A     | 0  | 0 | no  |
| KDM3B     | 0  | 0 | no  |
| KDM4B     | 0  | 0 | yes |
| KDM5B     | 0  | 1 | no  |
| KDM6B     | 0  | 0 | no  |
| KDR       | 0  | 0 | no  |
| KDSR      | 0  | 0 | no  |
| KEL       | 0  | 5 | no  |
| KERA      | 0  | 0 | no  |
| KHDC3L    | 0  | 0 | yes |
| KHK       | 0  | 0 | no  |
| KIAA0586  | 0  | 1 | yes |
| KIAA0753  | 0  | 0 | no  |
| KIAA0825  | 0  | 0 | yes |
| KIAA1549  | 0  | 0 | no  |
| KIDINS220 | 0  | 0 | yes |
| KIF11     | 0  | 0 | no  |
| KIF12     | 0  | 0 | no  |
| KIF14     | 0  | 0 | no  |
| KIF15     | 0  | 1 | yes |
| KIF1A     | 1  | 1 | no  |
| KIF1B     | 0  | 2 | no  |
| KIF1C     | 0  | 1 | yes |
| KIF20A    | 0  | 0 | no  |
| KIF21A    | 0  | 1 | no  |
| KIF22     | 0  | 1 | no  |
| KIF23     | 0  | 0 | no  |
| KIF26A    | 0  | 0 | no  |
| KIF2A     | 0  | 1 | yes |
| KIF3B     | 1  | 2 | no  |
| KIF5A     | 0  | 0 | no  |
| KIF5C     | 0  | 1 | yes |
| KIF7      | 0  | 0 | no  |
| KIFBP     | 0  | 1 | no  |
| KIR3DL1   | 22 | 7 | yes |
| KIRREL1   | 0  | 0 | no  |
| KISS1     | 0  | 0 | no  |

|         |    |    |     |
|---------|----|----|-----|
| KISS1R  | 0  | 0  | no  |
| KIT     | 0  | 0  | no  |
| KITLG   | 0  | 0  | no  |
| KIZ     | 0  | 2  | no  |
| KL      | 0  | 1  | no  |
| KLC2    | 8  | 9  | yes |
| KLF1    | 0  | 0  | no  |
| KLF11   | 0  | 1  | no  |
| KLF6    | 0  | 0  | no  |
| KLHDC8B | 0  | 1  | no  |
| KLHL10  | 0  | 0  | no  |
| KLHL24  | 0  | 0  | no  |
| KLHL3   | 0  | 0  | no  |
| KLHL40  | 0  | 0  | no  |
| KLHL41  | 0  | 0  | no  |
| KLHL7   | 0  | 0  | no  |
| KLK1    | 0  | 1  | no  |
| KLK4    | 0  | 1  | no  |
| KLKB1   | 1  | 0  | no  |
| KLLN    | 0  | 0  | no  |
| KMT2A   | 0  | 1  | no  |
| KMT2B   | 0  | 1  | no  |
| KMT2C   | 87 | 68 | yes |
| KMT2D   | 0  | 0  | no  |
| KMT2E   | 0  | 1  | yes |
| KMT5B   | 0  | 0  | no  |
| KNG1    | 0  | 0  | no  |
| KNL1    | 0  | 0  | no  |
| KNSTRN  | 0  | 0  | no  |
| KPNA3   | 1  | 0  | no  |
| KPNA7   | 0  | 0  | no  |
| KPTN    | 0  | 0  | no  |
| KRAS    | 0  | 0  | yes |
| KREMEN1 | 0  | 1  | no  |
| KRIT1   | 0  | 1  | no  |
| KRT1    | 0  | 0  | no  |
| KRT10   | 0  | 0  | no  |
| KRT12   | 0  | 0  | no  |
| KRT13   | 0  | 0  | no  |
| KRT14   | 0  | 0  | yes |
| KRT16   | 0  | 0  | yes |

|         |   |    |     |
|---------|---|----|-----|
| KRT17   | 0 | 0  | yes |
| KRT18   | 0 | 0  | no  |
| KRT2    | 0 | 0  | no  |
| KRT25   | 0 | 0  | no  |
| KRT3    | 0 | 0  | no  |
| KRT4    | 0 | 0  | no  |
| KRT5    | 0 | 0  | no  |
| KRT6A   | 0 | 0  | yes |
| KRT6B   | 0 | 0  | yes |
| KRT6C   | 0 | 0  | yes |
| KRT71   | 0 | 0  | no  |
| KRT74   | 0 | 0  | no  |
| KRT75   | 0 | 0  | no  |
| KRT81   | 0 | 0  | yes |
| KRT83   | 0 | 0  | yes |
| KRT85   | 0 | 0  | no  |
| KRT86   | 0 | 0  | yes |
| KRT9    | 0 | 0  | yes |
| KY      | 0 | 0  | no  |
| KYNU    | 0 | 2  | no  |
| L2HGDH  | 0 | 0  | no  |
| LACC1   | 0 | 0  | no  |
| LAMA1   | 0 | 0  | no  |
| LAMA2   | 8 | 10 | yes |
| LAMA3   | 0 | 1  | no  |
| LAMA4   | 0 | 0  | no  |
| LAMA5   | 0 | 0  | no  |
| LAMB1   | 0 | 0  | no  |
| LAMB2   | 0 | 1  | no  |
| LAMB3   | 0 | 0  | no  |
| LAMC2   | 0 | 0  | no  |
| LAMC3   | 0 | 0  | no  |
| LAMTOR2 | 0 | 1  | no  |
| LARGE1  | 0 | 0  | no  |
| LARP7   | 0 | 0  | no  |
| LARS1   | 0 | 0  | no  |
| LARS2   | 0 | 0  | no  |
| LAT     | 0 | 1  | no  |
| LBR     | 0 | 1  | no  |
| LBX1    | 0 | 0  | no  |
| LCA5    | 0 | 0  | no  |

|         |   |   |     |
|---------|---|---|-----|
| LCAT    | 0 | 2 | no  |
| LCK     | 0 | 1 | no  |
| LCP2    | 0 | 0 | no  |
| LCT     | 0 | 0 | no  |
| LDB3    | 0 | 0 | no  |
| LDHA    | 0 | 0 | no  |
| LDHB    | 0 | 0 | no  |
| LDHD    | 0 | 0 | no  |
| LDLR    | 0 | 0 | no  |
| LDLRAP1 | 0 | 0 | no  |
| LEF1    | 0 | 1 | no  |
| LEMD2   | 0 | 0 | no  |
| LEMD3   | 0 | 1 | no  |
| LEP     | 0 | 0 | no  |
| LEPR    | 6 | 7 | no  |
| LETM1   | 0 | 0 | yes |
| LFNG    | 0 | 0 | yes |
| LGALS2  | 0 | 0 | no  |
| LGI1    | 0 | 2 | no  |
| LGI3    | 0 | 1 | no  |
| LGI4    | 0 | 1 | no  |
| LGR4    | 0 | 0 | no  |
| LHB     | 0 | 0 | yes |
| LHCGR   | 1 | 0 | no  |
| LHFPL5  | 0 | 0 | no  |
| LHX3    | 0 | 0 | yes |
| LHX4    | 0 | 0 | yes |
| LIAS    | 0 | 0 | no  |
| LIFR    | 0 | 0 | no  |
| LIG1    | 0 | 0 | no  |
| LIG3    | 0 | 0 | no  |
| LIG4    | 0 | 0 | no  |
| LIM2    | 0 | 1 | no  |
| LIMA1   | 0 | 0 | yes |
| LIMS2   | 0 | 0 | no  |
| LINGO1  | 1 | 1 | no  |
| LINS1   | 0 | 0 | yes |
| LIPA    | 0 | 0 | no  |
| LIPC    | 0 | 0 | no  |
| LIPE    | 0 | 0 | no  |
| LIPH    | 0 | 0 | yes |



|          |    |   |     |
|----------|----|---|-----|
| LIPN     | 0  | 0 | no  |
| LIPT1    | 0  | 0 | no  |
| LIPT2    | 0  | 0 | yes |
| LITAF    | 0  | 0 | no  |
| LMAN1    | 0  | 0 | no  |
| LMAN2L   | 0  | 0 | no  |
| LMBR1    | 0  | 1 | no  |
| LMBRD1   | 0  | 1 | yes |
| LMBRD2   | 0  | 0 | no  |
| LMF1     | 16 | 6 | yes |
| LMNA     | 0  | 3 | no  |
| LMNB1    | 0  | 0 | no  |
| LMNB2    | 0  | 0 | no  |
| LMO1     | 0  | 0 | no  |
| LMO2     | 0  | 0 | no  |
| LMOD1    | 0  | 0 | no  |
| LMOD2    | 0  | 0 | no  |
| LMOD3    | 0  | 0 | no  |
| LMX1A    | 0  | 0 | no  |
| LMX1B    | 0  | 0 | no  |
| LNPK     | 2  | 0 | no  |
| LONP1    | 0  | 0 | no  |
| LORICRIN | 0  | 0 | no  |
| LOX      | 0  | 0 | no  |
| LOXHD1   | 0  | 0 | no  |
| LOXL1    | 0  | 0 | no  |
| LOXL3    | 0  | 0 | yes |
| LPA      | 77 | 7 | yes |
| LPAR6    | 0  | 1 | no  |
| LPIN1    | 0  | 2 | no  |
| LPIN2    | 0  | 0 | yes |
| LPL      | 0  | 0 | no  |
| LPP      | 0  | 0 | no  |
| LRAT     | 0  | 0 | no  |
| LRBA     | 3  | 2 | no  |
| LRIF1    | 0  | 0 | no  |
| LRIG2    | 1  | 1 | no  |
| LRIT3    | 0  | 0 | no  |
| LRMDA    | 2  | 2 | no  |
| LRP1     | 0  | 0 | no  |
| LRP12    | 0  | 0 | no  |

|         |   |    |     |
|---------|---|----|-----|
| LRP2    | 3 | 1  | no  |
| LRP4    | 0 | 0  | no  |
| LRP5    | 0 | 0  | yes |
| LRP6    | 0 | 1  | yes |
| LRP8    | 0 | 1  | no  |
| LRPAP1  | 1 | 0  | yes |
| LRPPRC  | 0 | 1  | no  |
| LRRC32  | 0 | 0  | no  |
| LRRC56  | 0 | 2  | no  |
| LRRC8A  | 0 | 0  | no  |
| LRRK1   | 0 | 0  | no  |
| LRRK2   | 0 | 0  | no  |
| LRSAM1  | 1 | 0  | no  |
| LRTOMT  | 0 | 0  | no  |
| LSM11   | 0 | 0  | no  |
| LSS     | 0 | 1  | no  |
| LTA     | 0 | 1  | no  |
| LTBP1   | 2 | 1  | no  |
| LTBP2   | 0 | 0  | no  |
| LTBP3   | 0 | 0  | no  |
| LTBP4   | 0 | 0  | no  |
| LTC4S   | 0 | 0  | no  |
| LTV1    | 0 | 0  | no  |
| LYL1    | 0 | 0  | no  |
| LYN     | 0 | 0  | no  |
| LYRM4   | 0 | 0  | yes |
| LYRM7   | 0 | 0  | no  |
| LYSET   | 0 | 0  | no  |
| LYST    | 0 | 1  | yes |
| LYZ     | 0 | 1  | no  |
| LZTFL1  | 0 | 0  | no  |
| LZTR1   | 0 | 18 | no  |
| LZTS1   | 0 | 0  | no  |
| M1AP    | 0 | 1  | yes |
| MAB21L1 | 0 | 0  | no  |
| MAB21L2 | 0 | 0  | no  |
| MACF1   | 0 | 0  | yes |
| MAD1L1  | 0 | 3  | yes |
| MAD2L2  | 0 | 3  | no  |
| MADD    | 0 | 0  | no  |
| MAF     | 0 | 0  | no  |

|          |   |   |     |
|----------|---|---|-----|
| MAFA     | 0 | 2 | no  |
| MAFB     | 0 | 0 | no  |
| MAG      | 0 | 2 | no  |
| MAGEL2   | 0 | 0 | no  |
| MAGI2    | 3 | 2 | yes |
| MAK      | 0 | 0 | no  |
| MALT1    | 0 | 0 | no  |
| MAML2    | 0 | 0 | no  |
| MAN1B1   | 0 | 0 | no  |
| MAN2B1   | 0 | 0 | no  |
| MAN2C1   | 0 | 0 | no  |
| MANBA    | 0 | 0 | yes |
| MAP1B    | 0 | 1 | no  |
| MAP2K1   | 0 | 0 | no  |
| MAP2K2   | 0 | 0 | no  |
| MAP3K1   | 0 | 1 | no  |
| MAP3K14  | 0 | 0 | no  |
| MAP3K20  | 0 | 1 | no  |
| MAP3K7   | 0 | 0 | no  |
| MAP3K8   | 0 | 1 | no  |
| MAPK1    | 0 | 6 | no  |
| MAPK8IP1 | 2 | 0 | no  |
| MAPK8IP3 | 0 | 0 | no  |
| MAPKAPK3 | 0 | 0 | no  |
| MAPKAPK5 | 0 | 0 | no  |
| MAPKBP1  | 0 | 0 | no  |
| MAPRE2   | 0 | 0 | no  |
| MAPT     | 0 | 1 | no  |
| MARCHF6  | 0 | 0 | no  |
| MARK3    | 0 | 0 | no  |
| MARS1    | 0 | 0 | no  |
| MARS2    | 1 | 0 | no  |
| MARVELD2 | 1 | 0 | no  |
| MASP1    | 0 | 0 | no  |
| MASP2    | 0 | 1 | yes |
| MAST1    | 0 | 0 | no  |
| MAST3    | 0 | 0 | no  |
| MAT1A    | 0 | 0 | no  |
| MATN3    | 0 | 0 | no  |
| MATR3    | 0 | 0 | yes |
| MAX      | 0 | 0 | no  |

|        |   |    |     |
|--------|---|----|-----|
| MB     | 0 | 0  | no  |
| MBD4   | 0 | 0  | no  |
| MBD5   | 2 | 1  | yes |
| MBL2   | 0 | 1  | no  |
| MBOAT7 | 0 | 0  | no  |
| MBTPS1 | 0 | 0  | no  |
| MC1R   | 0 | 0  | no  |
| MC2R   | 0 | 0  | no  |
| MC3R   | 0 | 0  | no  |
| MC4R   | 0 | 0  | no  |
| MCC    | 1 | 13 | no  |
| MCCC1  | 0 | 0  | no  |
| MCCC2  | 0 | 0  | no  |
| MCEE   | 0 | 0  | no  |
| MCFD2  | 0 | 0  | yes |
| MCIDAS | 0 | 0  | no  |
| MCM10  | 0 | 1  | yes |
| MCM2   | 0 | 0  | no  |
| MCM3AP | 0 | 0  | no  |
| MCM4   | 0 | 1  | no  |
| MCM5   | 0 | 0  | no  |
| MCM6   | 1 | 0  | no  |
| MCM8   | 0 | 0  | no  |
| MCM9   | 0 | 0  | no  |
| MCOLN1 | 0 | 0  | no  |
| MCPH1  | 0 | 0  | no  |
| MDFIC  | 0 | 0  | no  |
| MDH1   | 0 | 0  | no  |
| MDH2   | 0 | 0  | yes |
| MDM2   | 0 | 0  | yes |
| MDM4   | 0 | 0  | no  |
| MECOM  | 1 | 3  | no  |
| MECR   | 0 | 0  | no  |
| MED11  | 0 | 1  | no  |
| MED12L | 0 | 3  | no  |
| MED13  | 0 | 1  | no  |
| MED13L | 0 | 1  | no  |
| MED17  | 0 | 0  | no  |
| MED23  | 0 | 0  | no  |
| MED25  | 0 | 2  | no  |
| MED27  | 0 | 1  | no  |

|         |   |   |     |
|---------|---|---|-----|
| MEF2A   | 0 | 0 | no  |
| MEF2C   | 0 | 1 | yes |
| MEFV    | 0 | 0 | no  |
| MEGF10  | 1 | 1 | yes |
| MEGF8   | 0 | 0 | no  |
| MEI1    | 0 | 2 | yes |
| MEIOB   | 0 | 0 | no  |
| MEIS2   | 0 | 1 | no  |
| MEN1    | 0 | 0 | no  |
| MEOX1   | 0 | 1 | no  |
| MERTK   | 0 | 0 | no  |
| MESD    | 0 | 1 | no  |
| MESP2   | 0 | 0 | no  |
| MET     | 0 | 0 | no  |
| METTL13 | 0 | 1 | no  |
| METTL23 | 0 | 1 | no  |
| METTL5  | 1 | 0 | no  |
| MFAP5   | 0 | 0 | yes |
| MFF     | 0 | 1 | no  |
| MFHAS1  | 0 | 0 | no  |
| MFN2    | 0 | 4 | no  |
| MFRP    | 0 | 0 | no  |
| MFSD2A  | 0 | 0 | no  |
| MFSD8   | 0 | 1 | no  |
| MGAT2   | 0 | 0 | no  |
| MGME1   | 0 | 0 | no  |
| MGP     | 0 | 0 | no  |
| MIA3    | 0 | 0 | yes |
| MIAT    | 0 | 0 | no  |
| MIB1    | 0 | 0 | no  |
| MICOS13 | 0 | 0 | yes |
| MICU1   | 1 | 0 | no  |
| MIEF2   | 0 | 0 | no  |
| MIF     | 0 | 1 | no  |
| MINAR2  | 0 | 0 | no  |
| MINPP1  | 0 | 0 | yes |
| MIP     | 0 | 0 | no  |
| MIPEP   | 0 | 1 | yes |
| MIR140  | 0 | 0 | no  |
| MIR184  | 0 | 0 | no  |
| MIR204  | 0 | 0 | no  |

|         |   |   |     |
|---------|---|---|-----|
| MIR2861 | 0 | 1 | no  |
| MIR96   | 0 | 0 | no  |
| MITF    | 0 | 0 | no  |
| MKKS    | 0 | 0 | no  |
| MKRN3   | 0 | 0 | no  |
| MKS1    | 0 | 0 | no  |
| MLC1    | 0 | 0 | no  |
| MLH1    | 2 | 0 | no  |
| MLH3    | 0 | 0 | no  |
| MLIP    | 3 | 0 | yes |
| MLLT10  | 1 | 0 | yes |
| MLPH    | 0 | 0 | yes |
| MLYCD   | 0 | 0 | no  |
| MMAA    | 0 | 0 | yes |
| MMAB    | 0 | 1 | no  |
| MMACHC  | 0 | 0 | no  |
| MMADHC  | 0 | 0 | no  |
| MME     | 1 | 1 | no  |
| MMP1    | 0 | 0 | no  |
| MMP13   | 0 | 0 | no  |
| MMP14   | 0 | 0 | no  |
| MMP19   | 0 | 0 | no  |
| MMP2    | 0 | 0 | no  |
| MMP20   | 0 | 0 | no  |
| MMP21   | 0 | 0 | no  |
| MMP3    | 0 | 0 | no  |
| MMP9    | 0 | 0 | no  |
| MMUT    | 0 | 0 | no  |
| MN1     | 0 | 0 | no  |
| MNS1    | 0 | 0 | no  |
| MNX1    | 0 | 0 | no  |
| MOCOS   | 0 | 0 | no  |
| MOCS1   | 0 | 0 | yes |
| MOCS2   | 0 | 0 | no  |
| MOG     | 0 | 0 | no  |
| MOGS    | 0 | 0 | no  |
| MORC2   | 0 | 1 | no  |
| MOS     | 0 | 0 | no  |
| MOV10L1 | 0 | 0 | no  |
| MPC1    | 0 | 1 | yes |
| MPDU1   | 0 | 0 | no  |

|        |   |   |     |
|--------|---|---|-----|
| MPDZ   | 0 | 1 | no  |
| MPEG1  | 0 | 0 | no  |
| MPI    | 0 | 1 | no  |
| MPIG6B | 0 | 1 | no  |
| MPL    | 0 | 0 | no  |
| MPLKIP | 0 | 0 | yes |
| MPO    | 0 | 0 | no  |
| MPV17  | 0 | 0 | no  |
| MPZ    | 0 | 0 | no  |
| MPZL2  | 0 | 0 | no  |
| MRAP   | 0 | 0 | no  |
| MRAP2  | 0 | 0 | no  |
| MRAS   | 0 | 0 | no  |
| MRE11  | 0 | 0 | yes |
| MRM2   | 0 | 0 | no  |
| MRPL12 | 0 | 0 | no  |
| MRPL3  | 0 | 1 | yes |
| MRPL44 | 0 | 1 | no  |
| MRPS14 | 0 | 0 | no  |
| MRPS16 | 0 | 0 | yes |
| MRPS2  | 0 | 0 | yes |
| MRPS22 | 0 | 0 | no  |
| MRPS23 | 0 | 0 | no  |
| MRPS25 | 0 | 1 | no  |
| MRPS28 | 0 | 0 | no  |
| MRPS34 | 0 | 0 | no  |
| MRPS7  | 0 | 0 | no  |
| MRTFA  | 1 | 1 | no  |
| MS4A1  | 0 | 0 | no  |
| MS4A2  | 0 | 0 | no  |
| MSH2   | 0 | 1 | no  |
| MSH3   | 1 | 0 | yes |
| MSH4   | 0 | 0 | no  |
| MSH5   | 0 | 1 | no  |
| MSH6   | 0 | 1 | yes |
| MSMB   | 0 | 2 | no  |
| MSMO1  | 0 | 0 | no  |
| MSR1   | 0 | 0 | no  |
| MSRB3  | 0 | 1 | no  |
| MST1R  | 0 | 0 | no  |
| MSTN   | 0 | 0 | no  |

|        |   |   |     |
|--------|---|---|-----|
| MSTO1  | 0 | 1 | yes |
| MSX1   | 0 | 0 | no  |
| MSX2   | 0 | 0 | yes |
| MTAP   | 0 | 0 | no  |
| MTFMT  | 0 | 0 | no  |
| MTHFD1 | 0 | 0 | no  |
| MTHFR  | 0 | 3 | no  |
| MTHFS  | 0 | 0 | no  |
| MTMR14 | 0 | 0 | no  |
| MTMR2  | 0 | 0 | no  |
| MTNR1B | 0 | 0 | no  |
| MTO1   | 0 | 0 | yes |
| MTOR   | 0 | 1 | no  |
| MTPAP  | 0 | 1 | yes |
| MTR    | 0 | 1 | yes |
| MTRFR  | 0 | 0 | no  |
| MTRR   | 0 | 0 | no  |
| MTSS2  | 0 | 0 | no  |
| MTTP   | 0 | 0 | no  |
| MTX2   | 2 | 0 | no  |
| MUC1   | 0 | 0 | yes |
| MUC5B  | 6 | 2 | yes |
| MUC7   | 0 | 0 | no  |
| MUSK   | 2 | 2 | no  |
| MUTYH  | 0 | 0 | no  |
| MVD    | 0 | 0 | no  |
| MVK    | 0 | 0 | no  |
| MXI1   | 0 | 0 | no  |
| MYB    | 0 | 0 | no  |
| MYBPC1 | 0 | 1 | no  |
| MYBPC3 | 0 | 0 | no  |
| MYC    | 0 | 0 | no  |
| MYCN   | 0 | 0 | no  |
| MYD88  | 0 | 0 | no  |
| MYF5   | 0 | 0 | no  |
| MYH11  | 0 | 0 | no  |
| MYH14  | 0 | 2 | no  |
| MYH2   | 0 | 0 | no  |
| MYH3   | 0 | 0 | no  |
| MYH6   | 0 | 0 | no  |
| MYH7   | 0 | 0 | no  |



|         |   |   |     |
|---------|---|---|-----|
| MYH8    | 0 | 0 | no  |
| MYH9    | 0 | 0 | no  |
| MYL1    | 0 | 0 | no  |
| MYL11   | 0 | 0 | no  |
| MYL2    | 0 | 0 | no  |
| MYL3    | 0 | 0 | no  |
| MYL4    | 0 | 0 | no  |
| MYL9    | 0 | 1 | no  |
| MYLK    | 1 | 0 | yes |
| MYLK2   | 0 | 3 | no  |
| MYMK    | 0 | 1 | no  |
| MYMX    | 0 | 1 | no  |
| MYO15A  | 0 | 0 | no  |
| MYO18B  | 0 | 0 | no  |
| MYO1E   | 0 | 0 | yes |
| MYO1H   | 0 | 0 | no  |
| MYO3A   | 0 | 0 | yes |
| MYO5A   | 0 | 1 | no  |
| MYO5B   | 0 | 0 | yes |
| MYO6    | 0 | 0 | yes |
| MYO7A   | 0 | 0 | no  |
| MYO9A   | 0 | 1 | yes |
| MYO9B   | 0 | 0 | no  |
| MYOC    | 0 | 1 | no  |
| MYOCD   | 0 | 0 | no  |
| MYOD1   | 0 | 0 | no  |
| MYOF    | 0 | 0 | no  |
| MYORG   | 0 | 0 | no  |
| MYOT    | 0 | 0 | no  |
| MYOZ2   | 0 | 0 | no  |
| MYPN    | 0 | 0 | no  |
| MYRF    | 0 | 0 | yes |
| MYSM1   | 0 | 0 | no  |
| MYT1L   | 0 | 0 | yes |
| NAA15   | 0 | 0 | no  |
| NAA20   | 0 | 0 | no  |
| NACC1   | 0 | 0 | yes |
| NADK2   | 0 | 1 | yes |
| NADSYN1 | 0 | 0 | no  |
| NAE1    | 0 | 0 | no  |
| NAF1    | 0 | 0 | no  |

|         |    |    |     |
|---------|----|----|-----|
| NAGA    | 0  | 1  | no  |
| NAGLU   | 0  | 1  | yes |
| NAGS    | 0  | 0  | no  |
| NALCN   | 1  | 0  | no  |
| NANOS1  | 0  | 0  | yes |
| NANS    | 0  | 0  | no  |
| NAPB    | 0  | 0  | no  |
| NARS1   | 0  | 0  | no  |
| NARS2   | 1  | 1  | no  |
| NAT2    | 0  | 0  | no  |
| NAT8L   | 0  | 0  | no  |
| NAXD    | 0  | 0  | no  |
| NAXE    | 0  | 0  | no  |
| NBAS    | 0  | 1  | no  |
| NBEA    | 8  | 8  | yes |
| NBEAL2  | 0  | 0  | no  |
| NBN     | 0  | 0  | no  |
| NCAPD2  | 0  | 1  | yes |
| NCAPD3  | 0  | 4  | no  |
| NCAPG2  | 0  | 10 | yes |
| NCAPH   | 0  | 0  | no  |
| NCDN    | 0  | 0  | no  |
| NCF1    | 28 | 72 | yes |
| NCF2    | 0  | 1  | no  |
| NCF4    | 0  | 0  | no  |
| NCKAP1L | 0  | 0  | no  |
| NCR3    | 0  | 1  | no  |
| NCSTN   | 0  | 0  | no  |
| NDE1    | 0  | 0  | no  |
| NDNF    | 0  | 0  | no  |
| NDRG1   | 0  | 1  | no  |
| NDST1   | 0  | 0  | no  |
| NDUFA10 | 0  | 0  | yes |
| NDUFA11 | 0  | 0  | no  |
| NDUFA12 | 0  | 1  | no  |
| NDUFA13 | 0  | 1  | no  |
| NDUFA2  | 0  | 0  | no  |
| NDUFA4  | 0  | 0  | no  |
| NDUFA6  | 0  | 0  | no  |
| NDUFA8  | 0  | 0  | no  |
| NDUFA9  | 0  | 0  | no  |

|         |   |   |     |
|---------|---|---|-----|
| NDUFAF1 | 0 | 0 | no  |
| NDUFAF2 | 2 | 3 | yes |
| NDUFAF3 | 0 | 1 | no  |
| NDUFAF4 | 0 | 0 | yes |
| NDUFAF5 | 0 | 0 | no  |
| NDUFAF6 | 0 | 0 | no  |
| NDUFAF8 | 0 | 0 | no  |
| NDUFB10 | 0 | 0 | no  |
| NDUFB3  | 0 | 1 | yes |
| NDUFB7  | 0 | 0 | no  |
| NDUFB8  | 0 | 0 | no  |
| NDUFB9  | 0 | 0 | no  |
| NDUFC2  | 0 | 0 | yes |
| NDUFS1  | 0 | 0 | yes |
| NDUFS2  | 0 | 0 | no  |
| NDUFS3  | 0 | 0 | no  |
| NDUFS4  | 0 | 1 | no  |
| NDUFS6  | 0 | 1 | no  |
| NDUFS7  | 0 | 0 | no  |
| NDUFS8  | 0 | 0 | yes |
| NDUFV1  | 0 | 1 | no  |
| NDUFV2  | 0 | 0 | no  |
| NEB     | 3 | 1 | yes |
| NECAP1  | 0 | 0 | yes |
| NECTIN1 | 1 | 1 | no  |
| NECTIN4 | 0 | 0 | no  |
| NEDD4L  | 0 | 0 | no  |
| NEFH    | 0 | 0 | yes |
| NEFL    | 0 | 0 | no  |
| NEK1    | 0 | 0 | no  |
| NEK10   | 0 | 1 | no  |
| NEK2    | 0 | 0 | yes |
| NEK8    | 0 | 1 | no  |
| NEK9    | 0 | 0 | yes |
| NEMF    | 0 | 0 | no  |
| NEPRO   | 0 | 0 | no  |
| NEU1    | 0 | 2 | no  |
| NEUROD1 | 0 | 0 | no  |
| NEUROD2 | 0 | 0 | no  |
| NEUROG1 | 0 | 0 | no  |
| NEUROG3 | 0 | 1 | no  |

|         |   |    |     |
|---------|---|----|-----|
| NEXN    | 0 | 0  | no  |
| NF1     | 0 | 67 | yes |
| NF2     | 0 | 0  | yes |
| NFASC   | 0 | 0  | no  |
| NFATC2  | 0 | 0  | no  |
| NFE2L2  | 0 | 0  | yes |
| NFIA    | 0 | 0  | no  |
| NFIB    | 0 | 0  | no  |
| NFIX    | 0 | 0  | no  |
| NFKB1   | 0 | 0  | no  |
| NFKB2   | 0 | 0  | no  |
| NFKBIA  | 0 | 0  | no  |
| NFKBIL1 | 0 | 1  | no  |
| NFS1    | 0 | 0  | yes |
| NFU1    | 0 | 0  | no  |
| NGF     | 0 | 0  | no  |
| NGLY1   | 0 | 1  | yes |
| NHEJ1   | 0 | 0  | no  |
| NHERF1  | 0 | 0  | no  |
| NHLH2   | 0 | 0  | no  |
| NHLRC1  | 0 | 0  | yes |
| NHLRC2  | 1 | 0  | no  |
| NHP2    | 0 | 0  | no  |
| NIN     | 0 | 0  | no  |
| NIPA1   | 0 | 0  | yes |
| NIPAL4  | 0 | 0  | no  |
| NIPBL   | 0 | 1  | yes |
| NKX2-1  | 0 | 0  | no  |
| NKX2-5  | 0 | 1  | no  |
| NKX2-6  | 0 | 1  | no  |
| NKX3-2  | 0 | 0  | no  |
| NKX6-2  | 0 | 4  | no  |
| NLGN1   | 0 | 3  | no  |
| NLRC4   | 0 | 0  | no  |
| NLRP1   | 0 | 0  | no  |
| NLRP12  | 1 | 0  | no  |
| NLRP2   | 0 | 0  | yes |
| NLRP3   | 1 | 1  | no  |
| NLRP5   | 0 | 0  | yes |
| NLRP7   | 1 | 0  | yes |
| NME5    | 0 | 0  | no  |

|           |     |     |     |
|-----------|-----|-----|-----|
| NME8      | 0   | 0   | no  |
| NMNAT1    | 0   | 0   | no  |
| NNMT      | 0   | 0   | no  |
| NNT       | 0   | 0   | no  |
| NOBOX     | 1   | 4   | no  |
| NOD2      | 0   | 0   | no  |
| NODAL     | 0   | 1   | yes |
| NOG       | 0   | 1   | no  |
| NOL3      | 0   | 0   | yes |
| NOP10     | 0   | 0   | no  |
| NOP56     | 0   | 0   | no  |
| NOS1AP    | 0   | 0   | no  |
| NOS2      | 2   | 1   | yes |
| NOS3      | 0   | 0   | no  |
| NOTCH1    | 2   | 2   | no  |
| NOTCH2    | 25  | 100 | yes |
| NOTCH2NLC | 100 | 100 | yes |
| NOTCH3    | 0   | 0   | no  |
| NOVA2     | 0   | 0   | no  |
| NPC1      | 1   | 0   | no  |
| NPC1L1    | 0   | 0   | no  |
| NPC2      | 0   | 0   | no  |
| NPHP1     | 0   | 21  | yes |
| NPHP3     | 1   | 0   | yes |
| NPHP4     | 0   | 1   | no  |
| NPHS1     | 0   | 1   | no  |
| NPHS2     | 0   | 0   | no  |
| NPM1      | 0   | 0   | no  |
| NPPA      | 0   | 4   | no  |
| NPR2      | 0   | 1   | no  |
| NPR3      | 0   | 0   | no  |
| NPRL2     | 0   | 0   | no  |
| NPRL3     | 0   | 1   | no  |
| NPSR1     | 1   | 2   | yes |
| NPTX1     | 0   | 0   | no  |
| NQO1      | 0   | 0   | no  |
| NQO2      | 0   | 0   | yes |
| NR0B2     | 0   | 0   | no  |
| NR1H4     | 0   | 0   | no  |
| NR2E3     | 0   | 0   | no  |
| NR2F1     | 0   | 1   | no  |

|        |    |    |     |
|--------|----|----|-----|
| NR2F2  | 0  | 0  | no  |
| NR3C1  | 0  | 0  | yes |
| NR3C2  | 0  | 0  | no  |
| NR4A2  | 0  | 0  | no  |
| NR4A3  | 0  | 0  | no  |
| NR5A1  | 0  | 0  | no  |
| NRAS   | 0  | 0  | yes |
| NRCAM  | 6  | 1  | no  |
| NRG1   | 0  | 4  | no  |
| NRIP1  | 0  | 0  | no  |
| NRL    | 0  | 0  | no  |
| NRROS  | 0  | 0  | no  |
| NRXN1  | 1  | 1  | no  |
| NSD1   | 0  | 1  | no  |
| NSD2   | 0  | 0  | no  |
| NSF    | 37 | 53 | yes |
| NSMCE2 | 0  | 0  | no  |
| NSMCE3 | 0  | 0  | no  |
| NSMF   | 0  | 0  | no  |
| NSRP1  | 0  | 1  | yes |
| NSUN2  | 0  | 0  | no  |
| NSUN3  | 1  | 0  | yes |
| NT5C2  | 0  | 0  | no  |
| NT5C3A | 0  | 0  | yes |
| NT5E   | 0  | 0  | no  |
| NTF4   | 0  | 0  | yes |
| NTHL1  | 0  | 0  | no  |
| NTN1   | 0  | 1  | no  |
| NTNG2  | 0  | 0  | no  |
| NTRK1  | 0  | 0  | no  |
| NTRK2  | 0  | 0  | no  |
| NUAK2  | 0  | 0  | no  |
| NUBPL  | 0  | 0  | no  |
| NUDT15 | 0  | 1  | no  |
| NUDT2  | 0  | 0  | no  |
| NUMA1  | 0  | 0  | no  |
| NUP107 | 0  | 1  | yes |
| NUP133 | 0  | 0  | yes |
| NUP155 | 0  | 0  | yes |
| NUP160 | 0  | 0  | no  |
| NUP188 | 0  | 0  | no  |

|            |    |    |     |
|------------|----|----|-----|
| NUP205     | 0  | 0  | no  |
| NUP214     | 0  | 0  | no  |
| NUP37      | 0  | 0  | no  |
| NUP54      | 0  | 0  | no  |
| NUP62      | 0  | 2  | no  |
| NUP85      | 0  | 0  | no  |
| NUP88      | 0  | 0  | no  |
| NUP93      | 1  | 2  | no  |
| NUS1       | 0  | 0  | yes |
| NUTM2B-AS1 | 92 | 98 | yes |
| NXN        | 1  | 7  | yes |
| OAS1       | 0  | 1  | no  |
| OAT        | 0  | 0  | no  |
| OBSCN      | 0  | 1  | no  |
| OBSL1      | 0  | 2  | no  |
| OCA2       | 0  | 0  | yes |
| OCLN       | 25 | 96 | yes |
| ODAD1      | 0  | 0  | no  |
| ODAD2      | 0  | 0  | yes |
| ODAD3      | 0  | 1  | no  |
| ODAD4      | 0  | 0  | no  |
| ODAPH      | 0  | 0  | no  |
| ODC1       | 0  | 0  | no  |
| OGDH       | 0  | 0  | no  |
| OGDHL      | 0  | 0  | yes |
| OGG1       | 0  | 0  | no  |
| OLR1       | 0  | 1  | no  |
| OPA1       | 0  | 0  | yes |
| OPA3       | 0  | 0  | no  |
| OPCML      | 0  | 3  | no  |
| OPLAH      | 0  | 10 | no  |
| OPN1SW     | 0  | 0  | no  |
| OPTN       | 0  | 1  | no  |
| OR2J3      | 0  | 0  | yes |
| ORC1       | 0  | 0  | no  |
| ORC4       | 0  | 0  | yes |
| ORC6       | 0  | 0  | yes |
| OSBPL2     | 0  | 0  | no  |
| OSGEP      | 0  | 1  | no  |
| OSMR       | 0  | 0  | no  |
| OSTM1      | 0  | 0  | no  |

|          |    |    |     |
|----------|----|----|-----|
| OTOA     | 11 | 78 | yes |
| OTOF     | 0  | 0  | no  |
| OTOG     | 0  | 0  | no  |
| OTOGL    | 2  | 0  | yes |
| OTUD6B   | 0  | 0  | no  |
| OTULIN   | 0  | 1  | no  |
| OTX2     | 0  | 0  | no  |
| OVOL2    | 0  | 0  | no  |
| OXCT1    | 0  | 0  | no  |
| OXGR1    | 0  | 0  | no  |
| OXR1     | 5  | 5  | yes |
| P2RX2    | 0  | 4  | no  |
| P2RY12   | 0  | 0  | no  |
| P3H1     | 0  | 0  | no  |
| P3H2     | 1  | 0  | no  |
| P4HA2    | 1  | 0  | no  |
| P4HB     | 0  | 0  | no  |
| P4HTM    | 0  | 1  | no  |
| PABPN1   | 0  | 0  | no  |
| PACS1    | 0  | 1  | no  |
| PACS2    | 0  | 9  | no  |
| PADI3    | 0  | 0  | no  |
| PADI6    | 0  | 0  | yes |
| PAFAH1B1 | 0  | 0  | yes |
| PAH      | 0  | 0  | no  |
| PAICS    | 0  | 0  | no  |
| PAK1     | 0  | 1  | yes |
| PAK2     | 1  | 3  | yes |
| PALB2    | 1  | 0  | no  |
| PALLD    | 1  | 0  | no  |
| PAM16    | 0  | 0  | no  |
| PANK2    | 0  | 0  | no  |
| PANK4    | 0  | 0  | no  |
| PANX1    | 0  | 0  | no  |
| PAPPA2   | 1  | 1  | yes |
| PAPSS2   | 0  | 0  | yes |
| PARK7    | 0  | 0  | no  |
| PARN     | 7  | 0  | yes |
| PARS2    | 0  | 0  | yes |
| PATL2    | 0  | 0  | no  |
| PAX1     | 0  | 0  | no  |



|         |    |    |     |
|---------|----|----|-----|
| PAX2    | 0  | 0  | no  |
| PAX3    | 0  | 0  | no  |
| PAX4    | 0  | 0  | no  |
| PAX5    | 0  | 0  | no  |
| PAX6    | 0  | 0  | no  |
| PAX7    | 0  | 1  | no  |
| PAX8    | 0  | 0  | yes |
| PAX9    | 0  | 0  | no  |
| PBRM1   | 0  | 0  | no  |
| PBX1    | 0  | 0  | yes |
| PC      | 1  | 1  | no  |
| PCARE   | 0  | 0  | no  |
| PCBD1   | 0  | 1  | no  |
| PCCA    | 0  | 0  | yes |
| PCCB    | 0  | 0  | no  |
| PCDH12  | 0  | 0  | no  |
| PCDH15  | 18 | 46 | yes |
| PCDHGC4 | 0  | 0  | no  |
| PCGF2   | 0  | 0  | yes |
| PCK1    | 0  | 0  | no  |
| PCK2    | 0  | 0  | no  |
| PCLO    | 1  | 2  | no  |
| PCNA    | 0  | 0  | no  |
| PCNT    | 0  | 0  | yes |
| PCSK1   | 2  | 0  | no  |
| PCSK9   | 0  | 0  | no  |
| PCYT1A  | 0  | 0  | no  |
| PCYT2   | 0  | 0  | yes |
| PDCD1   | 1  | 0  | yes |
| PDCD10  | 0  | 0  | no  |
| PDCD6IP | 0  | 1  | yes |
| PDE10A  | 0  | 2  | no  |
| PDE11A  | 2  | 1  | yes |
| PDE1C   | 2  | 3  | no  |
| PDE2A   | 0  | 0  | no  |
| PDE3A   | 1  | 0  | yes |
| PDE4D   | 0  | 3  | yes |
| PDE6A   | 1  | 1  | no  |
| PDE6B   | 0  | 2  | no  |
| PDE6C   | 0  | 0  | no  |
| PDE6D   | 1  | 0  | no  |

|        |   |   |     |
|--------|---|---|-----|
| PDE6G  | 0 | 0 | no  |
| PDE6H  | 0 | 0 | no  |
| PDE8B  | 0 | 1 | no  |
| PDGFB  | 0 | 0 | no  |
| PDGFRA | 0 | 0 | yes |
| PDGFRB | 0 | 0 | no  |
| PDGFRL | 0 | 0 | yes |
| PDHA2  | 0 | 0 | no  |
| PDHB   | 0 | 0 | no  |
| PDHX   | 0 | 0 | no  |
| PDLIM4 | 0 | 0 | no  |
| PDP1   | 0 | 0 | no  |
| PDSS1  | 0 | 0 | yes |
| PDSS2  | 0 | 2 | no  |
| PDX1   | 0 | 1 | no  |
| PDXK   | 0 | 0 | no  |
| PDYN   | 0 | 0 | no  |
| PDZD7  | 0 | 0 | no  |
| PDZD8  | 0 | 0 | no  |
| PEPD   | 0 | 1 | no  |
| PER2   | 0 | 0 | yes |
| PER3   | 0 | 0 | no  |
| PERCC1 | 0 | 0 | no  |
| PERP   | 0 | 0 | yes |
| PET100 | 0 | 0 | no  |
| PET117 | 0 | 0 | no  |
| PEX1   | 0 | 0 | yes |
| PEX10  | 0 | 0 | no  |
| PEX11B | 0 | 0 | yes |
| PEX12  | 0 | 0 | no  |
| PEX13  | 0 | 0 | no  |
| PEX14  | 0 | 0 | no  |
| PEX16  | 0 | 0 | no  |
| PEX19  | 0 | 0 | yes |
| PEX2   | 0 | 0 | no  |
| PEX26  | 0 | 0 | no  |
| PEX3   | 0 | 0 | no  |
| PEX5   | 0 | 0 | yes |
| PEX6   | 1 | 0 | yes |
| PEX7   | 0 | 0 | no  |
| PFKL   | 1 | 0 | no  |

|         |   |    |     |
|---------|---|----|-----|
| PFKM    | 0 | 0  | no  |
| PFN1    | 0 | 1  | no  |
| PGAM2   | 0 | 1  | no  |
| PGAP1   | 0 | 1  | no  |
| PGAP2   | 0 | 0  | no  |
| PGAP3   | 0 | 1  | no  |
| PGM1    | 0 | 0  | no  |
| PGM2L1  | 0 | 0  | yes |
| PGM3    | 0 | 0  | no  |
| PGR     | 0 | 0  | no  |
| PHACTR1 | 4 | 0  | yes |
| PHB1    | 0 | 0  | yes |
| PHC1    | 0 | 0  | yes |
| PHF21A  | 0 | 1  | no  |
| PHGDH   | 0 | 0  | no  |
| PHIP    | 2 | 0  | no  |
| PHKB    | 0 | 0  | yes |
| PHKG2   | 0 | 0  | no  |
| PHOX2A  | 0 | 0  | yes |
| PHOX2B  | 0 | 1  | no  |
| PHYH    | 0 | 0  | no  |
| PHYKPL  | 0 | 0  | no  |
| PI4KA   | 6 | 19 | yes |
| PI4KB   | 0 | 0  | no  |
| PIBF1   | 0 | 1  | no  |
| PICALM  | 0 | 2  | no  |
| PIDD1   | 1 | 1  | no  |
| PIEZO1  | 0 | 2  | no  |
| PIEZO2  | 0 | 0  | yes |
| PIGB    | 0 | 0  | no  |
| PIGC    | 0 | 2  | yes |
| PIGF    | 0 | 0  | yes |
| PIGG    | 0 | 3  | yes |
| PIGH    | 0 | 0  | no  |
| PIGK    | 0 | 0  | yes |
| PIGL    | 0 | 5  | yes |
| PIGM    | 0 | 0  | no  |
| PIGN    | 0 | 0  | yes |
| PIGO    | 0 | 1  | yes |
| PIGP    | 0 | 0  | no  |
| PIGQ    | 0 | 2  | no  |

|         |    |    |     |
|---------|----|----|-----|
| PIGS    | 0  | 1  | no  |
| PIGT    | 0  | 0  | no  |
| PIGU    | 3  | 1  | no  |
| PIGV    | 0  | 0  | no  |
| PIGW    | 0  | 0  | no  |
| PIGY    | 0  | 0  | yes |
| PIK3C2A | 0  | 0  | no  |
| PIK3CA  | 41 | 2  | yes |
| PIK3CD  | 0  | 1  | yes |
| PIK3CG  | 0  | 1  | no  |
| PIK3R1  | 0  | 0  | no  |
| PIK3R2  | 0  | 0  | no  |
| PIK3R5  | 1  | 0  | no  |
| PIKFYVE | 0  | 0  | no  |
| PINK1   | 0  | 1  | no  |
| PIP5K1C | 0  | 1  | no  |
| PISD    | 0  | 1  | no  |
| PITPNM3 | 0  | 0  | no  |
| PITRM1  | 0  | 0  | no  |
| PITX1   | 0  | 0  | no  |
| PITX2   | 0  | 1  | no  |
| PITX3   | 0  | 0  | no  |
| PJKV    | 0  | 0  | no  |
| PKD1    | 12 | 12 | yes |
| PKD1L1  | 11 | 0  | no  |
| PKD2    | 0  | 0  | no  |
| PKDCC   | 0  | 0  | no  |
| PKHD1   | 1  | 1  | no  |
| PKLR    | 0  | 1  | no  |
| PKP1    | 1  | 1  | no  |
| PKP2    | 0  | 0  | yes |
| PLA2G2A | 0  | 1  | no  |
| PLA2G4A | 0  | 1  | no  |
| PLA2G5  | 0  | 1  | no  |
| PLA2G6  | 0  | 0  | no  |
| PLA2G7  | 0  | 0  | no  |
| PLAA    | 0  | 1  | no  |
| PLAG1   | 0  | 0  | no  |
| PLAU    | 0  | 0  | no  |
| PLCB1   | 1  | 0  | no  |
| PLCB2   | 0  | 0  | yes |

|         |    |    |     |
|---------|----|----|-----|
| PLCB3   | 0  | 0  | no  |
| PLCB4   | 0  | 0  | no  |
| PLCD1   | 0  | 0  | no  |
| PLCE1   | 0  | 1  | no  |
| PLCG2   | 0  | 0  | no  |
| PLCH1   | 4  | 0  | no  |
| PLCZ1   | 0  | 0  | yes |
| PLD1    | 0  | 0  | no  |
| PLD3    | 0  | 0  | no  |
| PLEC    | 0  | 9  | no  |
| PLEKHG2 | 0  | 1  | no  |
| PLEKHG5 | 0  | 0  | yes |
| PLEKHM1 | 15 | 90 | yes |
| PLG     | 3  | 2  | yes |
| PLIN1   | 0  | 0  | no  |
| PLIN4   | 0  | 1  | no  |
| PLK4    | 0  | 0  | no  |
| PLN     | 0  | 0  | no  |
| PLOD1   | 0  | 4  | yes |
| PLOD2   | 0  | 2  | no  |
| PLOD3   | 0  | 1  | yes |
| PLPBP   | 0  | 0  | no  |
| PLS1    | 1  | 1  | no  |
| PLVAP   | 0  | 0  | no  |
| PLXNA1  | 0  | 0  | no  |
| PLXND1  | 0  | 0  | no  |
| PMFBP1  | 0  | 0  | no  |
| PML     | 0  | 1  | yes |
| PMM2    | 0  | 1  | no  |
| PMP2    | 0  | 0  | no  |
| PMP22   | 0  | 3  | no  |
| PMPCA   | 0  | 0  | no  |
| PMPCB   | 0  | 0  | yes |
| PMS2    | 7  | 99 | yes |
| PMVK    | 0  | 0  | no  |
| PNKD    | 0  | 0  | no  |
| PNKP    | 0  | 2  | no  |
| PNLDC1  | 0  | 0  | no  |
| PNLIP   | 0  | 0  | no  |
| PNP     | 0  | 1  | no  |
| PNPLA1  | 0  | 0  | no  |

|         |   |   |     |
|---------|---|---|-----|
| PNPLA2  | 0 | 0 | no  |
| PNPLA6  | 0 | 0 | no  |
| PNPLA8  | 0 | 0 | yes |
| PNPO    | 0 | 0 | no  |
| PNPT1   | 0 | 0 | yes |
| POC1A   | 0 | 0 | no  |
| POC1B   | 0 | 0 | no  |
| POFUT1  | 0 | 2 | yes |
| POGLUT1 | 0 | 0 | no  |
| POGZ    | 0 | 0 | no  |
| POLD1   | 0 | 2 | no  |
| POLE    | 0 | 4 | yes |
| POLG    | 0 | 0 | no  |
| POLG2   | 0 | 0 | no  |
| POLH    | 0 | 0 | yes |
| POLR1A  | 0 | 0 | no  |
| POLR1B  | 0 | 0 | no  |
| POLR1C  | 0 | 2 | yes |
| POLR1D  | 0 | 1 | no  |
| POLR2A  | 0 | 0 | yes |
| POLR3A  | 0 | 0 | no  |
| POLR3B  | 0 | 0 | no  |
| POLR3F  | 0 | 0 | no  |
| POLR3GL | 0 | 0 | no  |
| POLR3K  | 0 | 2 | yes |
| POLRMT  | 0 | 0 | yes |
| POMC    | 0 | 0 | no  |
| POMGNT1 | 0 | 0 | no  |
| POMGNT2 | 0 | 0 | no  |
| POMK    | 0 | 0 | no  |
| POMP    | 0 | 0 | no  |
| POMT1   | 0 | 0 | no  |
| POMT2   | 0 | 0 | no  |
| PON1    | 0 | 0 | no  |
| PON2    | 0 | 0 | no  |
| POP1    | 0 | 1 | no  |
| POPDC3  | 0 | 1 | no  |
| POR     | 0 | 1 | yes |
| POT1    | 0 | 0 | no  |
| POU1F1  | 0 | 0 | no  |
| POU3F3  | 0 | 0 | no  |

|          |   |   |     |
|----------|---|---|-----|
| POU4F1   | 0 | 1 | no  |
| POU4F3   | 0 | 0 | no  |
| POU6F2   | 0 | 0 | no  |
| PPA2     | 0 | 0 | no  |
| PPARG    | 0 | 0 | no  |
| PPCS     | 0 | 0 | no  |
| PPFIBP1  | 0 | 2 | yes |
| PPIB     | 0 | 0 | no  |
| PPIL1    | 0 | 0 | no  |
| PIIP5K2  | 0 | 0 | no  |
| PPM1D    | 0 | 1 | no  |
| PPM1K    | 0 | 0 | no  |
| PPOX     | 0 | 0 | no  |
| PPP1CB   | 0 | 0 | no  |
| PPP1R12A | 0 | 0 | no  |
| PPP1R15B | 1 | 0 | no  |
| PPP1R17  | 0 | 0 | no  |
| PPP1R21  | 0 | 1 | no  |
| PPP1R3A  | 0 | 0 | no  |
| PPP2CA   | 0 | 0 | no  |
| PPP2R1A  | 0 | 0 | no  |
| PPP2R1B  | 0 | 0 | no  |
| PPP2R2B  | 0 | 0 | yes |
| PPP2R3C  | 0 | 0 | no  |
| PPP2R5D  | 0 | 0 | no  |
| PPP3CA   | 0 | 0 | no  |
| PPT1     | 0 | 0 | yes |
| PRCC     | 0 | 0 | no  |
| PRCD     | 0 | 2 | no  |
| PRDM10   | 0 | 0 | yes |
| PRDM12   | 0 | 1 | no  |
| PRDM13   | 0 | 0 | no  |
| PRDM16   | 0 | 1 | no  |
| PRDM5    | 0 | 1 | no  |
| PRDM6    | 0 | 0 | no  |
| PRDM8    | 0 | 0 | no  |
| PRDX1    | 0 | 0 | no  |
| PRDX3    | 0 | 0 | no  |
| PREPL    | 0 | 0 | no  |
| PRF1     | 0 | 1 | no  |
| PRG4     | 0 | 0 | no  |

|          |     |     |     |
|----------|-----|-----|-----|
| PRICKLE1 | 0   | 0   | no  |
| PRIM1    | 0   | 0   | no  |
| PRIMPOL  | 0   | 0   | no  |
| PRKACA   | 0   | 0   | no  |
| PRKACB   | 5   | 0   | no  |
| PRKACG   | 0   | 0   | no  |
| PRKAG2   | 0   | 1   | no  |
| PRKAG3   | 0   | 0   | no  |
| PRKAR1A  | 0   | 2   | no  |
| PRKAR1B  | 100 | 100 | yes |
| PRKCA    | 1   | 1   | yes |
| PRKCD    | 0   | 1   | no  |
| PRKCG    | 0   | 0   | no  |
| PRKCH    | 1   | 0   | no  |
| PRKCSH   | 0   | 0   | no  |
| PRKD1    | 0   | 2   | no  |
| PRKDC    | 0   | 1   | no  |
| PRKG1    | 0   | 0   | yes |
| PRKG2    | 0   | 0   | no  |
| PRKN     | 4   | 7   | no  |
| PRKRA    | 0   | 1   | no  |
| PRLR     | 0   | 0   | no  |
| PRMT7    | 0   | 1   | no  |
| PRNP     | 0   | 0   | no  |
| PROC     | 0   | 0   | no  |
| PRODH    | 3   | 2   | yes |
| PROK2    | 0   | 0   | no  |
| PROKR2   | 0   | 0   | yes |
| PROM1    | 0   | 1   | no  |
| PROP1    | 2   | 1   | yes |
| PRORP    | 2   | 0   | no  |
| PROS1    | 1   | 0   | yes |
| PROZ     | 0   | 3   | no  |
| PRPF3    | 0   | 0   | no  |
| PRPF31   | 1   | 0   | no  |
| PRPF4    | 0   | 0   | no  |
| PRPF6    | 0   | 0   | no  |
| PRPF8    | 0   | 0   | no  |
| PRPH     | 1   | 0   | no  |
| PRPH2    | 0   | 0   | no  |
| PRR12    | 0   | 1   | no  |



|         |   |    |     |
|---------|---|----|-----|
| PRRT2   | 0 | 1  | no  |
| PRRX1   | 0 | 0  | no  |
| PRSS1   | 3 | 3  | yes |
| PRSS12  | 0 | 0  | no  |
| PRSS2   | 1 | 4  | yes |
| PRSS56  | 0 | 0  | no  |
| PRUNE1  | 0 | 0  | no  |
| PRX     | 0 | 0  | no  |
| PSAP    | 0 | 0  | no  |
| PSAT1   | 0 | 0  | yes |
| PSEN1   | 0 | 0  | no  |
| PSEN2   | 0 | 1  | no  |
| PSENE1  | 0 | 1  | no  |
| PSMA6   | 0 | 0  | no  |
| PSMB1   | 0 | 0  | no  |
| PSMB10  | 0 | 2  | no  |
| PSMB4   | 0 | 0  | no  |
| PSMB8   | 0 | 0  | no  |
| PSMB9   | 0 | 0  | no  |
| PSMC1   | 0 | 0  | no  |
| PSMC3   | 0 | 0  | no  |
| PSMC3IP | 0 | 1  | no  |
| PSMD12  | 0 | 1  | no  |
| PSMG2   | 0 | 1  | no  |
| PSPH    | 0 | 12 | yes |
| PSTPIP1 | 0 | 1  | no  |
| PTCD3   | 0 | 0  | no  |
| PTCH1   | 0 | 0  | no  |
| PTCH2   | 0 | 0  | no  |
| PTDSS1  | 0 | 0  | no  |
| PTEN    | 0 | 0  | yes |
| PTF1A   | 0 | 0  | no  |
| PTGDR   | 0 | 0  | no  |
| PTGER2  | 0 | 0  | no  |
| PTGIS   | 0 | 1  | no  |
| PTH     | 0 | 0  | yes |
| PTH1R   | 0 | 0  | no  |
| PTHLH   | 0 | 0  | no  |
| PTPA    | 0 | 0  | no  |
| PTPN1   | 0 | 0  | no  |
| PTPN11  | 0 | 0  | yes |

|          |    |    |     |
|----------|----|----|-----|
| PTPN12   | 0  | 1  | no  |
| PTPN14   | 0  | 0  | yes |
| PTPN22   | 0  | 0  | no  |
| PTPN23   | 1  | 0  | no  |
| PTPRC    | 0  | 1  | no  |
| PTPRF    | 66 | 73 | no  |
| PTPRJ    | 0  | 0  | no  |
| PTPRO    | 0  | 1  | no  |
| PTPRQ    | 0  | 0  | no  |
| PTRH2    | 0  | 1  | no  |
| PTS      | 0  | 0  | yes |
| PUF60    | 0  | 7  | no  |
| PUM1     | 0  | 0  | no  |
| PURA     | 0  | 0  | no  |
| PUS1     | 0  | 2  | no  |
| PUS3     | 0  | 0  | no  |
| PUS7     | 0  | 0  | no  |
| PXDN     | 3  | 7  | no  |
| PYCR1    | 0  | 0  | no  |
| PYCR2    | 0  | 1  | no  |
| PYGL     | 0  | 0  | no  |
| PYGM     | 0  | 0  | no  |
| PYROXD1  | 0  | 1  | yes |
| QARS1    | 0  | 1  | no  |
| QDPR     | 0  | 0  | no  |
| QRICH1   | 0  | 1  | no  |
| QRICH2   | 1  | 0  | no  |
| QRSL1    | 0  | 0  | no  |
| RAB11B   | 0  | 0  | no  |
| RAB18    | 0  | 1  | no  |
| RAB23    | 0  | 0  | no  |
| RAB27A   | 0  | 0  | no  |
| RAB28    | 0  | 0  | no  |
| RAB33B   | 0  | 0  | no  |
| RAB3GAP1 | 0  | 0  | yes |
| RAB3GAP2 | 0  | 1  | yes |
| RAB5IF   | 0  | 0  | no  |
| RAB7A    | 0  | 0  | no  |
| RABL3    | 0  | 0  | no  |
| RAC1     | 0  | 0  | no  |
| RAC2     | 0  | 0  | no  |

|          |    |     |     |
|----------|----|-----|-----|
| RAC3     | 0  | 0   | no  |
| RACGAP1  | 0  | 0   | yes |
| RAD21    | 0  | 0   | yes |
| RAD50    | 0  | 0   | no  |
| RAD51    | 0  | 0   | no  |
| RAD51C   | 0  | 0   | yes |
| RAD51D   | 0  | 0   | no  |
| RAD54B   | 0  | 0   | no  |
| RAD54L   | 1  | 0   | yes |
| RAF1     | 0  | 0   | yes |
| RAG1     | 5  | 0   | no  |
| RAG2     | 0  | 0   | no  |
| RAI1     | 0  | 0   | no  |
| RALA     | 0  | 0   | yes |
| RALGAPA1 | 0  | 0   | yes |
| RANBP2   | 71 | 100 | yes |
| RAP1GDS1 | 0  | 0   | no  |
| RAPGEF2  | 0  | 0   | no  |
| RAPSN    | 0  | 0   | no  |
| RARA     | 0  | 1   | no  |
| RARB     | 2  | 1   | no  |
| RARS1    | 0  | 0   | no  |
| RARS2    | 0  | 0   | yes |
| RASA1    | 0  | 0   | no  |
| RASGRP1  | 0  | 0   | no  |
| RASGRP2  | 0  | 0   | no  |
| RAX      | 0  | 0   | no  |
| RAX2     | 0  | 0   | no  |
| RB1      | 0  | 1   | yes |
| RB1CC1   | 0  | 0   | no  |
| RBBP8    | 1  | 1   | no  |
| RBCK1    | 0  | 1   | no  |
| RBL2     | 0  | 0   | yes |
| RBM12    | 0  | 0   | no  |
| RBM20    | 0  | 0   | no  |
| RBM28    | 0  | 0   | no  |
| RBM8A    | 0  | 0   | yes |
| RBP3     | 0  | 0   | no  |
| RBP4     | 0  | 0   | no  |
| RBPJ     | 2  | 3   | yes |
| RC3H1    | 0  | 0   | no  |

|         |    |    |     |
|---------|----|----|-----|
| RCBTB1  | 0  | 0  | no  |
| RD3     | 0  | 0  | no  |
| RDH11   | 0  | 0  | no  |
| RDH12   | 0  | 0  | no  |
| RDH5    | 0  | 0  | no  |
| RDX     | 9  | 7  | yes |
| REC114  | 1  | 4  | no  |
| RECQL   | 0  | 0  | yes |
| RECQL4  | 0  | 15 | no  |
| REEP1   | 0  | 0  | no  |
| REEP2   | 0  | 0  | yes |
| REEP6   | 0  | 0  | no  |
| REL     | 0  | 0  | no  |
| RELA    | 0  | 0  | yes |
| RELB    | 0  | 0  | no  |
| RELN    | 0  | 1  | no  |
| RELT    | 0  | 0  | no  |
| REN     | 0  | 0  | no  |
| REPS1   | 0  | 0  | no  |
| RERE    | 15 | 1  | yes |
| REST    | 0  | 0  | yes |
| RET     | 1  | 1  | no  |
| RETN    | 0  | 0  | no  |
| RETREG1 | 0  | 3  | no  |
| RFC1    | 0  | 1  | no  |
| RFT1    | 0  | 0  | yes |
| RFWD3   | 0  | 0  | no  |
| RFX5    | 0  | 0  | no  |
| RFX6    | 0  | 1  | no  |
| RFX7    | 1  | 0  | no  |
| RFXANK  | 0  | 1  | no  |
| RFXAP   | 0  | 0  | no  |
| RGR     | 0  | 0  | no  |
| RGS5    | 0  | 1  | no  |
| RGS9    | 0  | 0  | no  |
| RGS9BP  | 0  | 0  | no  |
| RHAG    | 0  | 0  | no  |
| RHBDF2  | 0  | 1  | no  |
| RHCE    | 29 | 3  | yes |
| RHD     | 69 | 3  | yes |
| RHO     | 0  | 2  | no  |

|          |    |   |     |
|----------|----|---|-----|
| RHOA     | 0  | 1 | no  |
| RHOBTB2  | 0  | 1 | no  |
| RHOH     | 1  | 1 | no  |
| RIC1     | 0  | 1 | no  |
| RIGI     | 0  | 0 | no  |
| RILPL1   | 0  | 2 | no  |
| RIMS2    | 40 | 5 | no  |
| RIN2     | 0  | 0 | no  |
| RINT1    | 0  | 0 | no  |
| RIPK1    | 0  | 0 | yes |
| RIPK4    | 0  | 1 | no  |
| RIPOR2   | 3  | 9 | yes |
| RIPPLY2  | 0  | 0 | no  |
| RIT1     | 0  | 1 | no  |
| RLBP1    | 0  | 0 | no  |
| RMND1    | 0  | 0 | yes |
| RMRP     | 0  | 1 | no  |
| RNASEH1  | 0  | 0 | no  |
| RNASEH2A | 0  | 0 | no  |
| RNASEH2B | 0  | 0 | no  |
| RNASEH2C | 0  | 0 | no  |
| RNASEL   | 0  | 0 | no  |
| RNASET2  | 0  | 1 | no  |
| RNF125   | 0  | 0 | yes |
| RNF13    | 0  | 1 | yes |
| RNF139   | 0  | 0 | no  |
| RNF168   | 0  | 0 | no  |
| RNF170   | 0  | 0 | no  |
| RNF2     | 0  | 0 | yes |
| RNF212   | 0  | 1 | no  |
| RNF213   | 7  | 2 | no  |
| RNF216   | 0  | 0 | yes |
| RNF220   | 0  | 0 | no  |
| RNF43    | 0  | 0 | yes |
| RNF6     | 0  | 1 | yes |
| RNH1     | 0  | 0 | no  |
| RNPC3    | 2  | 1 | yes |
| RNU12    | 0  | 0 | no  |
| RNU4ATAC | 0  | 0 | no  |
| RNU7-1   | 0  | 0 | no  |
| ROBO1    | 2  | 3 | yes |

|          |    |    |     |
|----------|----|----|-----|
| ROBO2    | 30 | 4  | yes |
| ROBO3    | 0  | 0  | no  |
| ROBO4    | 0  | 0  | no  |
| ROGDI    | 0  | 0  | no  |
| ROM1     | 0  | 0  | yes |
| ROR1     | 1  | 5  | yes |
| ROR2     | 0  | 0  | no  |
| RORA     | 0  | 0  | yes |
| RORB     | 0  | 1  | no  |
| RORC     | 0  | 0  | no  |
| RP1      | 1  | 1  | yes |
| RP1L1    | 0  | 0  | no  |
| RP9      | 0  | 0  | no  |
| RPA1     | 0  | 0  | yes |
| RPE65    | 1  | 0  | no  |
| RPGRIP1  | 0  | 0  | yes |
| RPGRIP1L | 0  | 0  | yes |
| RPIA     | 1  | 0  | yes |
| RPL10L   | 0  | 0  | no  |
| RPL11    | 0  | 0  | no  |
| RPL13    | 0  | 0  | no  |
| RPL15    | 0  | 0  | yes |
| RPL18    | 0  | 0  | no  |
| RPL21    | 0  | 1  | no  |
| RPL26    | 0  | 0  | no  |
| RPL27    | 0  | 1  | yes |
| RPL35    | 0  | 0  | no  |
| RPL35A   | 0  | 1  | no  |
| RPL3L    | 0  | 0  | no  |
| RPL5     | 0  | 0  | no  |
| RPS10    | 1  | 0  | no  |
| RPS14    | 0  | 1  | no  |
| RPS15A   | 21 | 61 | yes |
| RPS17    | 0  | 0  | yes |
| RPS19    | 0  | 0  | no  |
| RPS23    | 0  | 0  | no  |
| RPS24    | 0  | 0  | no  |
| RPS26    | 0  | 0  | no  |
| RPS27    | 0  | 1  | no  |
| RPS28    | 0  | 0  | no  |
| RPS29    | 0  | 0  | yes |

|         |   |   |     |
|---------|---|---|-----|
| RPS7    | 0 | 0 | no  |
| RPSA    | 0 | 1 | no  |
| RRAGD   | 0 | 0 | no  |
| RRAS2   | 0 | 0 | yes |
| RRM2B   | 0 | 0 | yes |
| RRP7A   | 3 | 1 | yes |
| RSPH1   | 0 | 0 | no  |
| RSPH3   | 0 | 0 | no  |
| RSPH4A  | 0 | 0 | no  |
| RSPH9   | 0 | 0 | no  |
| RSPO1   | 0 | 0 | no  |
| RSPO2   | 0 | 0 | yes |
| RSPO4   | 0 | 0 | no  |
| RSPRY1  | 0 | 0 | no  |
| RSRC1   | 1 | 0 | yes |
| RTEL1   | 0 | 0 | no  |
| RTN2    | 0 | 0 | no  |
| RTN4IP1 | 0 | 1 | no  |
| RTN4R   | 3 | 3 | yes |
| RTTN    | 1 | 1 | no  |
| RUBCN   | 0 | 0 | yes |
| RUNX1   | 0 | 0 | no  |
| RUNX2   | 0 | 1 | no  |
| RUSC2   | 0 | 1 | no  |
| RXYLT1  | 0 | 0 | no  |
| RYR1    | 0 | 0 | no  |
| RYR2    | 0 | 0 | no  |
| RYR3    | 1 | 0 | no  |
| S1PR2   | 0 | 0 | no  |
| SACS    | 0 | 1 | no  |
| SAG     | 0 | 1 | no  |
| SALL1   | 0 | 0 | yes |
| SALL2   | 0 | 0 | no  |
| SALL4   | 0 | 0 | no  |
| SAMD12  | 0 | 0 | no  |
| SAMD9   | 0 | 0 | no  |
| SAMD9L  | 0 | 0 | no  |
| SAMHD1  | 0 | 1 | no  |
| SAR1B   | 1 | 0 | no  |
| SARDH   | 0 | 1 | no  |
| SARS1   | 0 | 4 | no  |

|         |    |    |     |
|---------|----|----|-----|
| SARS2   | 1  | 0  | no  |
| SASH1   | 0  | 0  | yes |
| SASS6   | 0  | 0  | no  |
| SATB1   | 0  | 0  | no  |
| SATB2   | 1  | 1  | no  |
| SBDS    | 44 | 0  | yes |
| SBF1    | 0  | 0  | yes |
| SBF2    | 0  | 2  | yes |
| SC5D    | 0  | 0  | yes |
| SCAPER  | 3  | 0  | no  |
| SCARB1  | 0  | 0  | no  |
| SCARB2  | 0  | 0  | no  |
| SCARF2  | 0  | 15 | no  |
| SCD5    | 0  | 0  | no  |
| SCGB3A2 | 0  | 0  | no  |
| SCN10A  | 0  | 2  | no  |
| SCN11A  | 0  | 1  | no  |
| SCN1A   | 0  | 1  | no  |
| SCN1B   | 0  | 0  | no  |
| SCN2A   | 1  | 0  | no  |
| SCN2B   | 0  | 0  | no  |
| SCN3A   | 1  | 1  | no  |
| SCN3B   | 0  | 0  | no  |
| SCN4A   | 0  | 0  | no  |
| SCN4B   | 0  | 0  | no  |
| SCN5A   | 0  | 1  | no  |
| SCN8A   | 1  | 1  | yes |
| SCN9A   | 0  | 0  | no  |
| SCNM1   | 0  | 0  | no  |
| SCNN1A  | 0  | 0  | no  |
| SCNN1B  | 0  | 0  | no  |
| SCNN1G  | 0  | 0  | no  |
| SCO1    | 0  | 0  | no  |
| SCO2    | 0  | 1  | no  |
| SCP2    | 1  | 1  | yes |
| SCUBE3  | 0  | 0  | yes |
| SCYL1   | 0  | 0  | no  |
| SCYL2   | 0  | 0  | yes |
| SDC3    | 0  | 0  | no  |
| SDCCAG8 | 0  | 1  | no  |
| SDHA    | 21 | 26 | yes |



|          |   |    |     |
|----------|---|----|-----|
| SDHAF1   | 0 | 1  | no  |
| SDHAF2   | 0 | 0  | no  |
| SDHB     | 0 | 1  | no  |
| SDHC     | 0 | 0  | no  |
| SDHD     | 0 | 0  | no  |
| SDR9C7   | 0 | 0  | yes |
| SEC23A   | 0 | 0  | yes |
| SEC23B   | 0 | 0  | no  |
| SEC24D   | 0 | 0  | no  |
| SEC31A   | 0 | 1  | no  |
| SEC61A1  | 0 | 0  | no  |
| SEC63    | 0 | 2  | no  |
| SECISBP2 | 0 | 1  | no  |
| SELENBP1 | 0 | 0  | no  |
| SELENOI  | 0 | 0  | no  |
| SELENON  | 0 | 0  | no  |
| SEMA3A   | 0 | 3  | no  |
| SEMA4A   | 0 | 1  | no  |
| SEMA6B   | 0 | 0  | no  |
| SEMA7A   | 0 | 0  | no  |
| SEPSECS  | 0 | 0  | no  |
| SEPTIN12 | 0 | 0  | no  |
| SEPTIN9  | 0 | 2  | no  |
| SERAC1   | 0 | 0  | no  |
| SERPINA1 | 0 | 0  | yes |
| SERPINA3 | 0 | 0  | no  |
| SERPINA6 | 0 | 1  | no  |
| SERPINB6 | 0 | 0  | no  |
| SERPINB7 | 0 | 0  | no  |
| SERPINB8 | 0 | 0  | no  |
| SERPINC1 | 0 | 0  | no  |
| SERPIND1 | 0 | 16 | no  |
| SERPINE1 | 0 | 1  | no  |
| SERPINF1 | 0 | 0  | no  |
| SERPINF2 | 0 | 0  | yes |
| SERPING1 | 0 | 0  | no  |
| SERPINH1 | 0 | 0  | no  |
| SERPINI1 | 0 | 1  | no  |
| SET      | 0 | 0  | yes |
| SETBP1   | 0 | 0  | yes |
| SETD1A   | 0 | 0  | no  |

|          |     |     |     |
|----------|-----|-----|-----|
| SETD1B   | 0   | 1   | no  |
| SETD2    | 0   | 0   | no  |
| SETD5    | 0   | 0   | no  |
| SETX     | 0   | 0   | no  |
| SF3B1    | 0   | 0   | yes |
| SF3B2    | 0   | 1   | no  |
| SF3B4    | 0   | 0   | no  |
| SFRP4    | 0   | 2   | no  |
| SFTPA1   | 0   | 0   | no  |
| SFTPA2   | 0   | 0   | yes |
| SFTPB    | 0   | 0   | no  |
| SFTPC    | 0   | 1   | no  |
| SFXN4    | 0   | 0   | yes |
| SGCA     | 0   | 0   | no  |
| SGCB     | 0   | 1   | no  |
| SGCD     | 12  | 0   | no  |
| SGCE     | 0   | 0   | no  |
| SGCG     | 0   | 2   | yes |
| SGMS2    | 0   | 1   | no  |
| SGO1     | 0   | 0   | no  |
| SGPL1    | 0   | 1   | yes |
| SGSH     | 0   | 0   | no  |
| SH2B3    | 0   | 0   | no  |
| SH3BP2   | 0   | 0   | no  |
| SH3GL1   | 0   | 0   | no  |
| SH3PXD2B | 0   | 1   | no  |
| SH3TC2   | 0   | 0   | yes |
| SHANK2   | 100 | 100 | yes |
| SHANK3   | 16  | 23  | yes |
| SHH      | 0   | 0   | no  |
| SHMT2    | 0   | 0   | no  |
| SHOC1    | 0   | 1   | no  |
| SHOC2    | 0   | 0   | no  |
| SHPK     | 0   | 1   | no  |
| SHQ1     | 0   | 2   | yes |
| SI       | 0   | 0   | no  |
| SIAE     | 0   | 0   | no  |
| SIAH1    | 0   | 0   | no  |
| SIGMAR1  | 0   | 0   | no  |
| SIK1     | 0   | 0   | yes |
| SIK3     | 0   | 3   | no  |

|          |   |   |     |
|----------|---|---|-----|
| SIL1     | 0 | 0 | no  |
| SIN3A    | 0 | 0 | yes |
| SIPA1L3  | 0 | 1 | no  |
| SIX1     | 0 | 0 | no  |
| SIX3     | 0 | 0 | no  |
| SIX5     | 0 | 0 | no  |
| SIX6     | 0 | 0 | no  |
| SKI      | 0 | 0 | no  |
| SKIC2    | 0 | 1 | no  |
| SKIC3    | 0 | 0 | no  |
| SLC10A1  | 0 | 0 | no  |
| SLC10A2  | 0 | 0 | yes |
| SLC10A7  | 2 | 2 | no  |
| SLC11A1  | 0 | 0 | no  |
| SLC11A2  | 0 | 1 | no  |
| SLC12A1  | 0 | 0 | no  |
| SLC12A2  | 0 | 0 | no  |
| SLC12A3  | 0 | 2 | no  |
| SLC12A5  | 0 | 0 | no  |
| SLC12A6  | 1 | 0 | no  |
| SLC13A3  | 0 | 0 | no  |
| SLC13A5  | 0 | 0 | no  |
| SLC14A1  | 0 | 0 | no  |
| SLC16A1  | 0 | 0 | no  |
| SLC16A12 | 0 | 0 | yes |
| SLC17A3  | 0 | 0 | no  |
| SLC17A5  | 0 | 0 | no  |
| SLC17A8  | 0 | 0 | no  |
| SLC17A9  | 0 | 0 | no  |
| SLC18A2  | 0 | 0 | no  |
| SLC18A3  | 0 | 0 | no  |
| SLC19A1  | 3 | 3 | no  |
| SLC19A2  | 0 | 0 | no  |
| SLC19A3  | 0 | 0 | no  |
| SLC1A1   | 0 | 0 | no  |
| SLC1A2   | 0 | 0 | no  |
| SLC1A3   | 0 | 0 | no  |
| SLC1A4   | 0 | 0 | no  |
| SLC20A2  | 0 | 0 | no  |
| SLC22A12 | 0 | 0 | no  |
| SLC22A18 | 0 | 0 | no  |

|          |   |   |     |
|----------|---|---|-----|
| SLC22A4  | 0 | 0 | no  |
| SLC22A5  | 0 | 0 | no  |
| SLC24A1  | 0 | 0 | no  |
| SLC24A4  | 0 | 0 | no  |
| SLC24A5  | 0 | 0 | no  |
| SLC25A1  | 0 | 2 | no  |
| SLC25A10 | 0 | 0 | no  |
| SLC25A11 | 0 | 1 | no  |
| SLC25A12 | 0 | 0 | yes |
| SLC25A13 | 0 | 0 | no  |
| SLC25A15 | 0 | 0 | yes |
| SLC25A19 | 0 | 0 | no  |
| SLC25A20 | 0 | 1 | no  |
| SLC25A21 | 0 | 0 | yes |
| SLC25A22 | 0 | 0 | no  |
| SLC25A24 | 3 | 6 | no  |
| SLC25A26 | 0 | 2 | no  |
| SLC25A3  | 0 | 1 | no  |
| SLC25A32 | 0 | 0 | no  |
| SLC25A36 | 0 | 0 | no  |
| SLC25A38 | 0 | 1 | no  |
| SLC25A4  | 0 | 0 | no  |
| SLC25A42 | 0 | 1 | no  |
| SLC25A46 | 0 | 0 | no  |
| SLC26A1  | 0 | 1 | no  |
| SLC26A2  | 0 | 0 | no  |
| SLC26A3  | 0 | 0 | no  |
| SLC26A4  | 0 | 0 | no  |
| SLC26A5  | 0 | 0 | no  |
| SLC26A8  | 0 | 0 | no  |
| SLC27A4  | 0 | 1 | no  |
| SLC28A1  | 0 | 8 | no  |
| SLC29A3  | 0 | 0 | no  |
| SLC2A1   | 0 | 0 | no  |
| SLC2A10  | 0 | 0 | no  |
| SLC2A2   | 0 | 0 | no  |
| SLC2A9   | 0 | 1 | yes |
| SLC30A10 | 0 | 0 | no  |
| SLC30A2  | 0 | 0 | no  |
| SLC30A8  | 0 | 0 | no  |
| SLC30A9  | 0 | 1 | yes |

|          |   |    |     |
|----------|---|----|-----|
| SLC31A1  | 0 | 0  | yes |
| SLC33A1  | 0 | 0  | yes |
| SLC34A1  | 0 | 0  | no  |
| SLC34A2  | 0 | 0  | no  |
| SLC34A3  | 1 | 0  | no  |
| SLC35A1  | 0 | 0  | no  |
| SLC35A3  | 0 | 0  | no  |
| SLC35B2  | 0 | 0  | no  |
| SLC35C1  | 0 | 0  | no  |
| SLC35D1  | 0 | 0  | no  |
| SLC36A2  | 0 | 0  | no  |
| SLC37A4  | 0 | 0  | no  |
| SLC38A3  | 0 | 0  | no  |
| SLC38A8  | 0 | 0  | no  |
| SLC39A13 | 0 | 0  | no  |
| SLC39A14 | 0 | 0  | no  |
| SLC39A4  | 0 | 14 | no  |
| SLC39A5  | 0 | 0  | no  |
| SLC39A7  | 0 | 0  | no  |
| SLC39A8  | 0 | 0  | no  |
| SLC3A1   | 0 | 0  | no  |
| SLC40A1  | 0 | 0  | no  |
| SLC41A1  | 0 | 0  | no  |
| SLC44A1  | 0 | 0  | no  |
| SLC44A4  | 0 | 2  | no  |
| SLC45A1  | 0 | 0  | no  |
| SLC45A2  | 0 | 0  | no  |
| SLC46A1  | 0 | 1  | no  |
| SLC4A1   | 0 | 0  | no  |
| SLC4A11  | 0 | 0  | no  |
| SLC4A2   | 0 | 0  | no  |
| SLC4A3   | 0 | 1  | no  |
| SLC4A4   | 0 | 1  | no  |
| SLC51A   | 0 | 0  | no  |
| SLC51B   | 0 | 1  | no  |
| SLC52A1  | 0 | 1  | yes |
| SLC52A2  | 0 | 14 | no  |
| SLC52A3  | 0 | 0  | no  |
| SLC5A1   | 0 | 1  | yes |
| SLC5A2   | 0 | 0  | no  |
| SLC5A5   | 0 | 0  | no  |

|          |    |    |     |
|----------|----|----|-----|
| SLC5A6   | 0  | 0  | no  |
| SLC5A7   | 0  | 0  | no  |
| SLC6A1   | 0  | 0  | no  |
| SLC6A17  | 0  | 0  | no  |
| SLC6A19  | 0  | 7  | no  |
| SLC6A2   | 1  | 0  | no  |
| SLC6A3   | 0  | 5  | no  |
| SLC6A4   | 0  | 1  | yes |
| SLC6A5   | 0  | 0  | yes |
| SLC6A6   | 0  | 0  | no  |
| SLC6A9   | 0  | 0  | no  |
| SLC7A14  | 1  | 0  | yes |
| SLC7A6OS | 0  | 1  | no  |
| SLC7A7   | 0  | 0  | no  |
| SLC7A9   | 0  | 0  | no  |
| SLC9A1   | 0  | 0  | no  |
| SLC9A3   | 22 | 33 | yes |
| SLC9A9   | 2  | 4  | yes |
| SLCO1B1  | 1  | 0  | no  |
| SLCO1B3  | 0  | 0  | no  |
| SLCO2A1  | 0  | 0  | no  |
| SLF2     | 0  | 0  | no  |
| SLFN14   | 0  | 0  | no  |
| SLITRK1  | 0  | 0  | no  |
| SLITRK6  | 0  | 0  | no  |
| SLURP1   | 0  | 1  | yes |
| SLX4     | 0  | 0  | no  |
| SMAD2    | 0  | 1  | no  |
| SMAD3    | 0  | 1  | no  |
| SMAD4    | 0  | 1  | no  |
| SMAD6    | 0  | 0  | no  |
| SMAD7    | 0  | 0  | no  |
| SMAD9    | 0  | 0  | no  |
| SMARCA2  | 0  | 1  | no  |
| SMARCA4  | 0  | 0  | no  |
| SMARCAD1 | 0  | 0  | no  |
| SMARCAL1 | 0  | 1  | no  |
| SMARCB1  | 0  | 1  | no  |
| SMARCC1  | 0  | 0  | no  |
| SMARCC2  | 0  | 0  | no  |
| SMARCD1  | 0  | 0  | no  |

|          |    |    |     |
|----------|----|----|-----|
| SMARCD2  | 0  | 0  | no  |
| SMARCE1  | 0  | 0  | no  |
| SMC3     | 0  | 0  | no  |
| SMC5     | 0  | 0  | no  |
| SMCHD1   | 0  | 0  | no  |
| SMG8     | 0  | 0  | yes |
| SMG9     | 0  | 0  | no  |
| SMIM1    | 0  | 0  | no  |
| SMN1     | 83 | 65 | yes |
| SMN2     | 83 | 76 | yes |
| SMO      | 0  | 0  | no  |
| SMOC1    | 0  | 0  | no  |
| SMOC2    | 22 | 22 | yes |
| SMPD1    | 0  | 0  | no  |
| SMPD4    | 53 | 29 | yes |
| SNAP25   | 0  | 0  | no  |
| SNAP29   | 0  | 16 | no  |
| SNCA     | 0  | 0  | no  |
| SNCB     | 0  | 0  | no  |
| SNIP1    | 0  | 0  | no  |
| SNORA31  | 0  | 0  | no  |
| SNORD118 | 0  | 0  | no  |
| SNRN200  | 0  | 0  | no  |
| SNRPB    | 0  | 0  | no  |
| SNRPE    | 0  | 1  | yes |
| SNTA1    | 0  | 0  | no  |
| SNX10    | 0  | 1  | no  |
| SNX14    | 0  | 0  | no  |
| SOBP     | 0  | 0  | no  |
| SOCS1    | 0  | 1  | yes |
| SOD1     | 0  | 0  | no  |
| SOD2     | 0  | 0  | yes |
| SOD3     | 0  | 0  | no  |
| SOHLH1   | 0  | 0  | no  |
| SON      | 0  | 2  | yes |
| SORD     | 72 | 2  | yes |
| SORT1    | 0  | 4  | no  |
| SOS1     | 0  | 0  | no  |
| SOS2     | 0  | 0  | yes |
| SOST     | 0  | 1  | no  |
| SOX10    | 0  | 0  | no  |

|         |   |   |     |
|---------|---|---|-----|
| SOX11   | 0 | 0 | no  |
| SOX17   | 0 | 0 | no  |
| SOX18   | 0 | 0 | no  |
| SOX2    | 0 | 0 | yes |
| SOX4    | 0 | 0 | no  |
| SOX5    | 0 | 4 | no  |
| SOX6    | 0 | 2 | yes |
| SOX9    | 0 | 0 | no  |
| SP110   | 0 | 0 | no  |
| SP6     | 0 | 0 | no  |
| SP7     | 0 | 0 | no  |
| SPACA1  | 0 | 0 | no  |
| SPAG1   | 0 | 0 | no  |
| SPAG17  | 0 | 1 | no  |
| SPARC   | 0 | 0 | no  |
| SPART   | 0 | 0 | no  |
| SPAST   | 0 | 0 | no  |
| SPATA16 | 1 | 0 | yes |
| SPATA7  | 0 | 0 | no  |
| SPECC1L | 2 | 2 | yes |
| SPEF2   | 0 | 0 | no  |
| SPEG    | 0 | 0 | no  |
| SPEN    | 0 | 2 | no  |
| SPG11   | 0 | 0 | yes |
| SPG21   | 1 | 0 | no  |
| SPG7    | 0 | 0 | no  |
| SPI1    | 0 | 0 | no  |
| SPIDR   | 8 | 9 | yes |
| SPINK1  | 0 | 0 | no  |
| SPINK2  | 0 | 0 | no  |
| SPINK5  | 0 | 0 | no  |
| SPINT2  | 0 | 0 | no  |
| SPNS2   | 0 | 1 | no  |
| SPOP    | 0 | 0 | no  |
| SPPL2A  | 0 | 0 | no  |
| SPR     | 0 | 0 | no  |
| SPRED1  | 0 | 0 | no  |
| SPRED2  | 0 | 0 | no  |
| SPRTN   | 0 | 1 | yes |
| SPRY2   | 0 | 0 | no  |
| SPRY4   | 0 | 0 | no  |



|         |   |   |     |
|---------|---|---|-----|
| SPTA1   | 0 | 0 | no  |
| SPTAN1  | 0 | 0 | no  |
| SPTB    | 0 | 0 | no  |
| SPTBN1  | 0 | 0 | no  |
| SPTBN2  | 0 | 0 | yes |
| SPTBN4  | 0 | 0 | no  |
| SPTLC1  | 0 | 0 | yes |
| SPTLC2  | 1 | 0 | no  |
| SPTSSA  | 0 | 0 | no  |
| SQOR    | 0 | 0 | no  |
| SQSTM1  | 0 | 0 | yes |
| SRC     | 0 | 1 | no  |
| SRCAP   | 0 | 0 | no  |
| SRD5A2  | 0 | 0 | no  |
| SRD5A3  | 0 | 0 | yes |
| SREBF1  | 0 | 0 | no  |
| SRGAP1  | 0 | 0 | no  |
| SRP54   | 1 | 0 | no  |
| SRP72   | 1 | 1 | yes |
| SRRM2   | 0 | 0 | no  |
| SRSF1   | 0 | 0 | no  |
| SS18    | 0 | 1 | yes |
| SSBP1   | 0 | 0 | no  |
| ST14    | 0 | 0 | no  |
| ST3GAL3 | 0 | 0 | yes |
| ST3GAL5 | 0 | 0 | no  |
| STAC3   | 0 | 0 | no  |
| STAG1   | 0 | 0 | yes |
| STAG3   | 1 | 0 | yes |
| STAMBP  | 0 | 1 | no  |
| STAR    | 0 | 0 | no  |
| STARD7  | 0 | 0 | no  |
| STAT1   | 0 | 0 | no  |
| STAT2   | 0 | 0 | no  |
| STAT3   | 0 | 1 | no  |
| STAT4   | 0 | 0 | no  |
| STAT5B  | 0 | 1 | yes |
| STEAP3  | 0 | 0 | no  |
| STIL    | 0 | 1 | no  |
| STIM1   | 0 | 0 | yes |
| STING1  | 0 | 0 | no  |

|         |    |    |     |
|---------|----|----|-----|
| STK11   | 0  | 0  | no  |
| STK36   | 0  | 0  | no  |
| STK4    | 0  | 1  | no  |
| STN1    | 0  | 0  | no  |
| STOX1   | 0  | 0  | no  |
| STRA6   | 0  | 0  | no  |
| STRADA  | 0  | 0  | no  |
| STRC    | 1  | 4  | yes |
| STT3A   | 1  | 0  | yes |
| STT3B   | 0  | 0  | no  |
| STUB1   | 0  | 1  | no  |
| STX11   | 0  | 0  | no  |
| STX16   | 0  | 0  | no  |
| STX1B   | 0  | 0  | no  |
| STX3    | 0  | 0  | no  |
| STX5    | 0  | 1  | no  |
| STXBP1  | 0  | 0  | no  |
| STXBP2  | 0  | 0  | no  |
| SUCLA2  | 0  | 1  | no  |
| SUCLG1  | 0  | 0  | no  |
| SUFU    | 0  | 1  | no  |
| SUGCT   | 0  | 4  | yes |
| SULT2B1 | 0  | 0  | no  |
| SUMF1   | 4  | 3  | no  |
| SUMO1   | 0  | 1  | yes |
| SUMO4   | 0  | 0  | no  |
| SUN5    | 0  | 0  | no  |
| SUOX    | 0  | 1  | yes |
| SUPT16H | 0  | 0  | yes |
| SURF1   | 0  | 1  | no  |
| SUZ12   | 15 | 67 | yes |
| SVBP    | 0  | 0  | yes |
| SVIL    | 1  | 0  | yes |
| SYCE1   | 0  | 11 | yes |
| SYCP2   | 0  | 0  | no  |
| SYCP3   | 0  | 0  | no  |
| SYK     | 0  | 0  | no  |
| SYN2    | 0  | 0  | yes |
| SYNE1   | 0  | 1  | no  |
| SYNE2   | 1  | 1  | no  |
| SYNE4   | 0  | 1  | no  |

|         |   |   |     |
|---------|---|---|-----|
| SYNGAP1 | 1 | 0 | no  |
| SYNJ1   | 0 | 0 | yes |
| SYT1    | 1 | 2 | yes |
| SYT14   | 0 | 1 | yes |
| SYT2    | 0 | 0 | yes |
| SZT2    | 1 | 0 | no  |
| TAB2    | 0 | 0 | no  |
| TAC3    | 1 | 0 | no  |
| TACO1   | 0 | 0 | yes |
| TACR3   | 0 | 1 | yes |
| TACSTD2 | 0 | 0 | no  |
| TAF13   | 0 | 3 | no  |
| TAF15   | 0 | 0 | yes |
| TAF2    | 0 | 0 | no  |
| TAF4    | 0 | 2 | no  |
| TAF4B   | 1 | 0 | yes |
| TAF6    | 0 | 0 | no  |
| TAF8    | 0 | 0 | no  |
| TAL1    | 0 | 0 | no  |
| TAL2    | 0 | 0 | no  |
| TALDO1  | 0 | 0 | no  |
| TAMM41  | 0 | 0 | no  |
| TANC2   | 0 | 1 | yes |
| TANGO2  | 0 | 4 | no  |
| TAOK1   | 0 | 1 | no  |
| TAP1    | 0 | 0 | no  |
| TAP2    | 0 | 0 | no  |
| TAPBP   | 0 | 0 | no  |
| TAPT1   | 0 | 2 | yes |
| TARDBP  | 0 | 1 | yes |
| TARS1   | 0 | 0 | no  |
| TARS2   | 1 | 0 | no  |
| TAS2R16 | 0 | 0 | no  |
| TAS2R38 | 0 | 0 | no  |
| TASP1   | 0 | 1 | yes |
| TAT     | 0 | 0 | no  |
| TBC1D20 | 0 | 1 | no  |
| TBC1D23 | 0 | 1 | no  |
| TBC1D24 | 0 | 0 | no  |
| TBC1D2B | 0 | 0 | yes |
| TBC1D4  | 0 | 0 | no  |

|         |   |    |     |
|---------|---|----|-----|
| TBC1D7  | 0 | 0  | no  |
| TBCD    | 0 | 2  | yes |
| TBCE    | 1 | 0  | no  |
| TBCK    | 1 | 0  | yes |
| TBK1    | 0 | 0  | yes |
| TBL1XR1 | 0 | 1  | yes |
| TBP     | 1 | 0  | no  |
| TBR1    | 0 | 0  | no  |
| TBX1    | 0 | 3  | no  |
| TBX15   | 0 | 0  | no  |
| TBX18   | 0 | 0  | no  |
| TBX19   | 0 | 0  | no  |
| TBX2    | 0 | 0  | no  |
| TBX20   | 4 | 17 | yes |
| TBX21   | 0 | 0  | no  |
| TBX3    | 0 | 0  | no  |
| TBX4    | 0 | 0  | no  |
| TBX5    | 0 | 0  | no  |
| TBX6    | 0 | 1  | no  |
| TBXA2R  | 1 | 0  | no  |
| TBXAS1  | 0 | 0  | no  |
| TBXT    | 0 | 0  | no  |
| TCAP    | 0 | 0  | no  |
| TCF12   | 0 | 2  | yes |
| TCF20   | 0 | 1  | yes |
| TCF3    | 0 | 4  | no  |
| TCF4    | 0 | 1  | no  |
| TCF7L2  | 0 | 0  | no  |
| TCHH    | 0 | 0  | no  |
| TCIRG1  | 0 | 0  | no  |
| TCL1A   | 0 | 0  | no  |
| TCL1B   | 0 | 0  | no  |
| TCN2    | 0 | 0  | no  |
| TCOF1   | 0 | 0  | no  |
| TCTN1   | 0 | 0  | no  |
| TCTN2   | 0 | 1  | no  |
| TCTN3   | 0 | 0  | no  |
| TDO2    | 0 | 0  | no  |
| TDP1    | 0 | 0  | no  |
| TDP2    | 0 | 0  | no  |
| TDRD7   | 0 | 1  | no  |

|        |    |    |     |
|--------|----|----|-----|
| TDRD9  | 0  | 1  | yes |
| TEAD1  | 0  | 0  | no  |
| TECPR2 | 0  | 0  | no  |
| TECR   | 0  | 0  | yes |
| TECRL  | 0  | 0  | no  |
| TECTA  | 0  | 1  | no  |
| TEFM   | 0  | 65 | no  |
| TEK    | 0  | 0  | no  |
| TEKT3  | 0  | 3  | no  |
| TELO2  | 0  | 0  | no  |
| TENM3  | 2  | 3  | no  |
| TENM4  | 1  | 1  | no  |
| TENT5A | 0  | 0  | no  |
| TERB1  | 0  | 1  | no  |
| TERB2  | 15 | 0  | yes |
| TERC   | 0  | 0  | no  |
| TERT   | 0  | 6  | yes |
| TET2   | 0  | 0  | no  |
| TET3   | 0  | 0  | no  |
| TEX14  | 0  | 0  | no  |
| TEX15  | 0  | 0  | no  |
| TF     | 0  | 1  | no  |
| TFAM   | 0  | 0  | yes |
| TFAP2A | 0  | 1  | no  |
| TFAP2B | 0  | 0  | no  |
| TFG    | 0  | 0  | no  |
| TFR2   | 0  | 0  | no  |
| TFRC   | 0  | 1  | no  |
| TG     | 0  | 0  | no  |
| TGDS   | 0  | 0  | no  |
| TGFB1  | 0  | 0  | no  |
| TGFB2  | 0  | 0  | no  |
| TGFB3  | 0  | 0  | no  |
| TGFBI  | 0  | 0  | no  |
| TGFBR1 | 0  | 0  | no  |
| TGFBR2 | 0  | 0  | no  |
| TGIF1  | 0  | 0  | no  |
| TGM1   | 0  | 0  | no  |
| TGM3   | 0  | 1  | no  |
| TGM5   | 0  | 1  | no  |
| TGM6   | 0  | 0  | no  |

|          |    |   |     |
|----------|----|---|-----|
| TH       | 0  | 0 | no  |
| THAP1    | 0  | 0 | no  |
| THBD     | 0  | 0 | no  |
| THBS2    | 0  | 0 | no  |
| THG1L    | 0  | 0 | no  |
| THOC1    | 0  | 5 | no  |
| THOC6    | 0  | 0 | yes |
| THPO     | 0  | 0 | no  |
| THRA     | 0  | 0 | no  |
| THRB     | 0  | 1 | no  |
| THSD1    | 0  | 4 | yes |
| THSD4    | 3  | 1 | yes |
| THUMPD1  | 0  | 0 | yes |
| TIA1     | 0  | 0 | no  |
| TIAM1    | 0  | 0 | yes |
| TICAM1   | 0  | 0 | no  |
| TIE1     | 0  | 0 | no  |
| TIMELESS | 0  | 0 | no  |
| TIMM22   | 0  | 3 | no  |
| TIMM50   | 0  | 0 | no  |
| TIMMDC1  | 0  | 0 | no  |
| TIMP3    | 0  | 0 | no  |
| TINF2    | 0  | 0 | no  |
| TIRAP    | 0  | 0 | no  |
| TJP2     | 1  | 0 | no  |
| TK2      | 0  | 0 | no  |
| TKFC     | 0  | 0 | no  |
| TKT      | 0  | 0 | no  |
| TLCD3B   | 0  | 2 | no  |
| TLE6     | 0  | 0 | no  |
| TLK2     | 72 | 2 | yes |
| TLL1     | 0  | 0 | no  |
| TLR1     | 0  | 0 | yes |
| TLR2     | 0  | 0 | no  |
| TLR3     | 1  | 0 | no  |
| TLR5     | 0  | 1 | no  |
| TM4SF20  | 0  | 0 | no  |
| TMC1     | 0  | 0 | no  |
| TMC6     | 0  | 1 | no  |
| TMC8     | 0  | 0 | no  |
| TMCO1    | 0  | 0 | no  |

|           |   |   |     |
|-----------|---|---|-----|
| TMEM106B  | 0 | 0 | no  |
| TMEM107   | 0 | 0 | no  |
| TMEM126A  | 0 | 1 | no  |
| TMEM126B  | 0 | 1 | no  |
| TMEM127   | 0 | 0 | no  |
| TMEM132E  | 0 | 0 | no  |
| TMEM138   | 0 | 0 | no  |
| TMEM147   | 0 | 1 | no  |
| TMEM151A  | 0 | 2 | no  |
| TMEM163   | 1 | 0 | yes |
| TMEM165   | 1 | 0 | no  |
| TMEM199   | 0 | 1 | no  |
| TMEM216   | 0 | 0 | no  |
| TMEM218   | 0 | 0 | no  |
| TMEM222   | 0 | 0 | yes |
| TMEM231   | 0 | 0 | no  |
| TMEM237   | 0 | 0 | no  |
| TMEM240   | 0 | 0 | yes |
| TMEM260   | 0 | 0 | no  |
| TMEM38B   | 0 | 0 | yes |
| TMEM43    | 0 | 0 | no  |
| TMEM53    | 0 | 0 | no  |
| TMEM63A   | 0 | 1 | yes |
| TMEM63C   | 0 | 0 | no  |
| TMEM67    | 0 | 0 | no  |
| TMEM70    | 0 | 0 | no  |
| TMEM94    | 0 | 0 | no  |
| TMEM98    | 0 | 0 | no  |
| TMIE      | 0 | 0 | no  |
| TMPRSS15  | 0 | 1 | yes |
| TMPRSS3   | 0 | 0 | no  |
| TMPRSS6   | 0 | 0 | no  |
| TMTC3     | 0 | 1 | no  |
| TMX2      | 0 | 0 | no  |
| TNC       | 0 | 0 | no  |
| TNF       | 0 | 1 | no  |
| TNFAIP3   | 0 | 0 | no  |
| TNFRSF10B | 0 | 1 | no  |
| TNFRSF11A | 0 | 0 | no  |
| TNFRSF11B | 0 | 0 | no  |
| TNFRSF13B | 0 | 0 | no  |

|           |    |    |     |
|-----------|----|----|-----|
| TNFRSF13C | 0  | 0  | no  |
| TNFRSF1A  | 0  | 0  | no  |
| TNFRSF4   | 0  | 0  | no  |
| TNFRSF9   | 0  | 0  | no  |
| TNFSF11   | 0  | 0  | no  |
| TNFSF4    | 1  | 0  | yes |
| TNIK      | 0  | 2  | yes |
| TNNC1     | 0  | 0  | no  |
| TNNC2     | 0  | 1  | no  |
| TNNI2     | 0  | 0  | no  |
| TNNI3     | 0  | 0  | no  |
| TNNI3K    | 0  | 0  | no  |
| TNNT1     | 0  | 0  | no  |
| TNNT2     | 0  | 0  | no  |
| TNNT3     | 0  | 0  | yes |
| TNPO2     | 0  | 1  | no  |
| TNPO3     | 0  | 0  | yes |
| TNR       | 0  | 0  | no  |
| TNRC6A    | 0  | 0  | no  |
| TNRC6B    | 0  | 2  | no  |
| TNXB      | 25 | 1  | yes |
| TOE1      | 0  | 0  | no  |
| TOGARAM1  | 0  | 0  | no  |
| TOM1      | 0  | 0  | no  |
| TONSL     | 0  | 14 | no  |
| TOP1      | 0  | 0  | yes |
| TOP2A     | 0  | 1  | no  |
| TOP2B     | 0  | 0  | no  |
| TOP3A     | 0  | 0  | no  |
| TOP6BL    | 0  | 0  | no  |
| TOPORS    | 0  | 0  | no  |
| TOR1A     | 0  | 0  | no  |
| TOR1AIP1  | 0  | 0  | no  |
| TP53      | 0  | 0  | no  |
| TP53RK    | 0  | 0  | no  |
| TP63      | 0  | 0  | no  |
| TP73      | 1  | 0  | no  |
| TPCN2     | 0  | 0  | no  |
| TPH2      | 0  | 0  | no  |
| TPI1      | 0  | 0  | no  |
| TPK1      | 0  | 5  | yes |



|          |    |    |     |
|----------|----|----|-----|
| TPM1     | 0  | 0  | no  |
| TPM2     | 0  | 1  | no  |
| TPM3     | 0  | 0  | yes |
| TPM4     | 1  | 0  | yes |
| TPMT     | 0  | 0  | yes |
| TPO      | 28 | 19 | yes |
| TPP1     | 0  | 0  | no  |
| TPP2     | 0  | 0  | no  |
| TPR      | 0  | 0  | no  |
| TPRKB    | 0  | 0  | no  |
| TPRN     | 0  | 0  | no  |
| TRAC     | 0  | 0  | no  |
| TRAF3    | 0  | 0  | no  |
| TRAF3IP1 | 0  | 1  | no  |
| TRAF3IP2 | 1  | 0  | no  |
| TRAF7    | 0  | 0  | no  |
| TRAIP    | 0  | 0  | no  |
| TRAK1    | 0  | 0  | no  |
| TRAPPC10 | 0  | 1  | yes |
| TRAPPC11 | 0  | 0  | no  |
| TRAPPC12 | 1  | 1  | no  |
| TRAPPC14 | 0  | 0  | no  |
| TRAPPC2L | 0  | 0  | no  |
| TRAPPC4  | 0  | 0  | no  |
| TRAPPC6B | 1  | 0  | no  |
| TRAPPC9  | 1  | 0  | yes |
| TRDN     | 8  | 1  | no  |
| TREH     | 0  | 1  | yes |
| TREM2    | 0  | 0  | no  |
| TREX1    | 0  | 0  | yes |
| TRH      | 0  | 0  | no  |
| TRHR     | 0  | 0  | no  |
| TRIM2    | 0  | 0  | yes |
| TRIM32   | 0  | 0  | no  |
| TRIM36   | 0  | 0  | yes |
| TRIM37   | 0  | 0  | no  |
| TRIM44   | 0  | 0  | no  |
| TRIM71   | 0  | 0  | no  |
| TRIM8    | 0  | 0  | no  |
| TRIO     | 0  | 2  | no  |
| TRIOBP   | 0  | 1  | no  |

|         |   |    |     |
|---------|---|----|-----|
| TRIP11  | 1 | 0  | yes |
| TRIP12  | 0 | 0  | no  |
| TRIP13  | 0 | 10 | yes |
| TRIP4   | 0 | 0  | no  |
| TRIT1   | 0 | 0  | no  |
| TRMT1   | 0 | 0  | no  |
| TRMT10A | 0 | 0  | no  |
| TRMT10C | 0 | 0  | no  |
| TRMT5   | 0 | 0  | yes |
| TRMU    | 2 | 2  | no  |
| TRNT1   | 0 | 0  | no  |
| TRPA1   | 1 | 0  | no  |
| TRPC3   | 0 | 0  | no  |
| TRPC6   | 0 | 0  | no  |
| TRPM1   | 0 | 0  | no  |
| TRPM3   | 1 | 3  | yes |
| TRPM4   | 0 | 0  | no  |
| TRPM6   | 1 | 0  | yes |
| TRPM7   | 0 | 0  | no  |
| TRPS1   | 0 | 1  | no  |
| TRPV3   | 0 | 0  | no  |
| TRPV4   | 0 | 0  | no  |
| TRPV6   | 0 | 5  | no  |
| TRRAP   | 0 | 2  | no  |
| TSC1    | 0 | 0  | no  |
| TSC2    | 0 | 0  | yes |
| TSEN15  | 0 | 0  | no  |
| TSEN2   | 0 | 0  | no  |
| TSEN34  | 0 | 0  | no  |
| TSEN54  | 0 | 0  | no  |
| TSFM    | 0 | 0  | no  |
| TSGA10  | 0 | 0  | no  |
| TSHB    | 0 | 0  | no  |
| TSHR    | 0 | 2  | yes |
| TSHZ1   | 0 | 0  | no  |
| TSPAN12 | 0 | 0  | no  |
| TSPEAR  | 1 | 0  | yes |
| TSPOAP1 | 0 | 0  | no  |
| TSPYL1  | 0 | 0  | no  |
| TTBK2   | 0 | 0  | yes |
| TTC12   | 0 | 0  | no  |

|         |    |    |     |
|---------|----|----|-----|
| TTC19   | 0  | 5  | no  |
| TTC21A  | 0  | 1  | no  |
| TTC21B  | 0  | 0  | no  |
| TTC29   | 0  | 0  | no  |
| TTC5    | 0  | 1  | yes |
| TTC7A   | 0  | 0  | no  |
| TTC8    | 0  | 0  | no  |
| TTI1    | 0  | 1  | no  |
| TTI2    | 0  | 1  | no  |
| TLL5    | 0  | 0  | no  |
| TTN     | 32 | 2  | yes |
| TTPA    | 0  | 0  | no  |
| TTR     | 0  | 0  | no  |
| TUB     | 0  | 1  | no  |
| TUBA1A  | 0  | 0  | yes |
| TUBA3D  | 42 | 30 | yes |
| TUBA4A  | 1  | 0  | no  |
| TUBA8   | 0  | 1  | no  |
| TUBB    | 0  | 0  | yes |
| TUBB1   | 0  | 0  | yes |
| TUBB2A  | 0  | 1  | yes |
| TUBB2B  | 0  | 0  | yes |
| TUBB3   | 0  | 0  | yes |
| TUBB4A  | 0  | 0  | yes |
| TUBB4B  | 0  | 0  | no  |
| TUBB6   | 0  | 1  | yes |
| TUBB8   | 32 | 44 | yes |
| TUBG1   | 0  | 1  | no  |
| TUBGCP2 | 0  | 3  | no  |
| TUBGCP4 | 0  | 0  | no  |
| TUBGCP6 | 0  | 1  | no  |
| TUFM    | 0  | 2  | no  |
| TUFT1   | 0  | 1  | no  |
| TULP1   | 0  | 0  | no  |
| TULP3   | 0  | 0  | no  |
| TUSC3   | 2  | 0  | no  |
| TWIST1  | 0  | 0  | no  |
| TWIST2  | 24 | 19 | no  |
| TWNK    | 0  | 0  | no  |
| TXN2    | 0  | 0  | no  |
| TXNDC15 | 0  | 0  | no  |

|         |    |    |     |
|---------|----|----|-----|
| TXNL4A  | 0  | 20 | no  |
| TXNRD2  | 0  | 4  | no  |
| TYK2    | 0  | 1  | no  |
| TYMP    | 0  | 1  | no  |
| TYMS    | 0  | 5  | no  |
| TYR     | 71 | 8  | yes |
| TYROBP  | 0  | 1  | no  |
| TYRP1   | 0  | 0  | no  |
| UBA2    | 0  | 0  | no  |
| UBA5    | 0  | 0  | yes |
| UBAP1   | 0  | 0  | yes |
| UBAP2L  | 0  | 0  | no  |
| UBE2T   | 0  | 1  | no  |
| UBE3A   | 0  | 0  | yes |
| UBE3B   | 0  | 1  | no  |
| UBE3C   | 0  | 0  | yes |
| UBE4A   | 0  | 1  | yes |
| UBIAD1  | 0  | 1  | no  |
| UBR1    | 0  | 0  | yes |
| UBR7    | 0  | 0  | no  |
| UBTF    | 0  | 1  | yes |
| UCHL1   | 0  | 1  | no  |
| UCP2    | 0  | 0  | no  |
| UCP3    | 0  | 0  | no  |
| UFC1    | 0  | 1  | no  |
| UFM1    | 0  | 0  | yes |
| UFSP2   | 0  | 0  | no  |
| UGDH    | 0  | 1  | no  |
| UGP2    | 0  | 0  | no  |
| UGT1A1  | 0  | 0  | yes |
| UGT2B17 | 6  | 9  | yes |
| UMOD    | 0  | 0  | no  |
| UMPS    | 0  | 0  | no  |
| UNC119  | 0  | 1  | no  |
| UNC13D  | 0  | 0  | no  |
| UNC45A  | 0  | 0  | no  |
| UNC45B  | 0  | 0  | yes |
| UNC80   | 0  | 0  | no  |
| UNC93B1 | 2  | 0  | yes |
| UNG     | 0  | 0  | no  |
| UPB1    | 0  | 3  | no  |

|         |    |    |     |
|---------|----|----|-----|
| UQCC2   | 0  | 0  | no  |
| UQCC3   | 0  | 0  | no  |
| UQCRB   | 0  | 0  | yes |
| UQCRC1  | 0  | 1  | no  |
| UQCRC2  | 0  | 0  | no  |
| UQCRFS1 | 0  | 0  | yes |
| UQCRH   | 0  | 0  | no  |
| UQCRQ   | 0  | 0  | no  |
| UROC1   | 0  | 0  | no  |
| UROD    | 0  | 0  | yes |
| UROS    | 0  | 0  | no  |
| USB1    | 0  | 0  | no  |
| USF1    | 0  | 0  | no  |
| USH1C   | 0  | 0  | no  |
| USH1G   | 0  | 0  | no  |
| USH2A   | 0  | 1  | no  |
| USP18   | 33 | 56 | yes |
| USP45   | 0  | 0  | no  |
| USP48   | 0  | 1  | no  |
| USP53   | 0  | 0  | no  |
| USP7    | 0  | 0  | no  |
| USP8    | 0  | 0  | yes |
| UVSSA   | 0  | 0  | no  |
| VAC14   | 0  | 1  | no  |
| VAMP1   | 0  | 0  | yes |
| VAMP2   | 0  | 0  | no  |
| VANGL1  | 0  | 0  | no  |
| VANGL2  | 0  | 0  | no  |
| VAPB    | 0  | 0  | no  |
| VAR1    | 0  | 1  | no  |
| VAR2    | 0  | 0  | no  |
| VAX1    | 0  | 0  | no  |
| VCAN    | 0  | 1  | no  |
| VCL     | 0  | 1  | no  |
| VCP     | 0  | 1  | no  |
| VDR     | 1  | 1  | no  |
| VEGFA   | 0  | 0  | no  |
| VEGFC   | 0  | 0  | no  |
| VEZF1   | 0  | 0  | yes |
| VHL     | 0  | 0  | no  |
| VIM     | 0  | 0  | no  |

|         |    |    |     |
|---------|----|----|-----|
| VIPAS39 | 0  | 0  | no  |
| VKORC1  | 0  | 0  | no  |
| VLDLR   | 0  | 1  | no  |
| VPS11   | 0  | 0  | no  |
| VPS13A  | 0  | 6  | no  |
| VPS13B  | 0  | 2  | yes |
| VPS13C  | 0  | 1  | no  |
| VPS13D  | 0  | 7  | no  |
| VPS16   | 0  | 0  | no  |
| VPS33A  | 0  | 0  | no  |
| VPS33B  | 0  | 0  | yes |
| VPS35   | 0  | 0  | yes |
| VPS35L  | 0  | 1  | no  |
| VPS37A  | 0  | 0  | yes |
| VPS41   | 0  | 0  | no  |
| VPS45   | 0  | 0  | no  |
| VPS4A   | 0  | 0  | no  |
| VPS50   | 9  | 0  | no  |
| VPS51   | 0  | 0  | no  |
| VPS53   | 10 | 16 | yes |
| VRK1    | 0  | 0  | no  |
| VSX1    | 0  | 0  | no  |
| VSX2    | 0  | 0  | no  |
| VWA1    | 0  | 0  | yes |
| VWA3B   | 0  | 0  | no  |
| VWA8    | 2  | 0  | no  |
| VWF     | 3  | 0  | yes |
| WAC     | 0  | 1  | yes |
| WARS1   | 0  | 0  | no  |
| WARS2   | 0  | 1  | yes |
| WASF1   | 2  | 5  | no  |
| WASHC4  | 0  | 0  | no  |
| WASHC5  | 0  | 1  | no  |
| WBP11   | 0  | 0  | yes |
| WBP2    | 0  | 0  | no  |
| WDFY3   | 1  | 1  | no  |
| WDPCP   | 0  | 2  | yes |
| WDR1    | 0  | 0  | no  |
| WDR11   | 0  | 1  | no  |
| WDR19   | 0  | 0  | no  |
| WDR26   | 0  | 0  | no  |

|         |   |   |     |
|---------|---|---|-----|
| WDR35   | 0 | 0 | no  |
| WDR36   | 0 | 0 | no  |
| WDR37   | 1 | 2 | no  |
| WDR4    | 0 | 0 | yes |
| WDR45B  | 0 | 1 | yes |
| WDR62   | 0 | 1 | no  |
| WDR72   | 4 | 1 | no  |
| WDR73   | 0 | 8 | yes |
| WDR81   | 0 | 1 | yes |
| WEE2    | 0 | 0 | no  |
| WFS1    | 0 | 0 | no  |
| WHRN    | 0 | 0 | no  |
| WIPF1   | 0 | 0 | no  |
| WIP12   | 1 | 0 | no  |
| WLS     | 0 | 0 | yes |
| WNK1    | 1 | 0 | no  |
| WNK4    | 0 | 1 | no  |
| WNT1    | 0 | 0 | no  |
| WNT10A  | 0 | 0 | no  |
| WNT10B  | 0 | 0 | no  |
| WNT2B   | 0 | 0 | no  |
| WNT3    | 0 | 1 | no  |
| WNT4    | 0 | 0 | no  |
| WNT5A   | 0 | 0 | no  |
| WNT7A   | 0 | 1 | no  |
| WRAP53  | 0 | 0 | no  |
| WRN     | 0 | 0 | yes |
| WT1     | 0 | 0 | no  |
| WWC1    | 1 | 1 | no  |
| WWOX    | 5 | 1 | no  |
| XBP1    | 0 | 0 | no  |
| XDH     | 0 | 1 | yes |
| XPA     | 0 | 1 | yes |
| XPC     | 0 | 0 | no  |
| XPNPEP3 | 1 | 2 | no  |
| XPR1    | 6 | 2 | no  |
| XRCC1   | 0 | 0 | no  |
| XRCC2   | 0 | 0 | no  |
| XRCC3   | 0 | 0 | no  |
| XRCC4   | 0 | 0 | no  |
| XYLT1   | 1 | 0 | yes |

|          |   |   |     |
|----------|---|---|-----|
| XYLT2    | 0 | 0 | no  |
| YAP1     | 0 | 0 | yes |
| YARS1    | 0 | 0 | no  |
| YARS2    | 0 | 0 | yes |
| YEATS2   | 2 | 0 | no  |
| YIF1B    | 0 | 0 | no  |
| YIPF5    | 0 | 0 | no  |
| YME1L1   | 1 | 0 | yes |
| YRDC     | 1 | 0 | no  |
| YWHAG    | 0 | 0 | no  |
| YY1      | 0 | 0 | no  |
| YY1AP1   | 0 | 1 | yes |
| ZAP70    | 0 | 0 | no  |
| ZBTB11   | 0 | 0 | yes |
| ZBTB16   | 0 | 0 | no  |
| ZBTB18   | 0 | 1 | no  |
| ZBTB20   | 0 | 3 | no  |
| ZBTB24   | 0 | 1 | no  |
| ZBTB42   | 0 | 2 | no  |
| ZBTB7A   | 0 | 0 | no  |
| ZC3H14   | 0 | 0 | no  |
| ZCCHC8   | 0 | 0 | no  |
| ZEB1     | 0 | 1 | yes |
| ZEB2     | 0 | 0 | yes |
| ZFAT     | 0 | 0 | yes |
| ZFHX2    | 0 | 1 | no  |
| ZFHX3    | 1 | 1 | no  |
| ZFHX4    | 0 | 0 | no  |
| ZFP36L2  | 0 | 0 | no  |
| ZFP57    | 0 | 1 | no  |
| ZFPM2    | 0 | 0 | no  |
| ZFYVE19  | 0 | 0 | no  |
| ZFYVE26  | 0 | 0 | yes |
| ZFYVE27  | 0 | 0 | no  |
| ZIC1     | 0 | 0 | no  |
| ZIC2     | 0 | 0 | no  |
| ZMIZ1    | 0 | 1 | no  |
| ZMPSTE24 | 0 | 0 | no  |
| ZMYM2    | 0 | 1 | yes |
| ZMYND10  | 0 | 0 | no  |
| ZMYND11  | 0 | 4 | no  |



|         |    |    |     |
|---------|----|----|-----|
| ZMYND15 | 0  | 1  | no  |
| ZNF141  | 0  | 3  | yes |
| ZNF142  | 0  | 0  | no  |
| ZNF148  | 0  | 0  | no  |
| ZNF292  | 67 | 82 | no  |
| ZNF335  | 0  | 0  | yes |
| ZNF341  | 0  | 0  | yes |
| ZNF365  | 0  | 0  | no  |
| ZNF407  | 0  | 3  | no  |
| ZNF408  | 0  | 0  | no  |
| ZNF423  | 0  | 0  | no  |
| ZNF462  | 0  | 0  | no  |
| ZNF469  | 89 | 32 | yes |
| ZNF513  | 0  | 0  | no  |
| ZNF526  | 0  | 0  | no  |
| ZNF644  | 0  | 0  | no  |
| ZNF668  | 0  | 0  | no  |
| ZNF687  | 0  | 0  | no  |
| ZNF699  | 0  | 0  | no  |
| ZNF750  | 0  | 2  | no  |
| ZNFX1   | 0  | 2  | no  |
| ZNHIT3  | 0  | 0  | no  |
| ZP1     | 0  | 0  | no  |
| ZP2     | 1  | 0  | no  |
| ZP3     | 5  | 2  | yes |
| ZPBP    | 0  | 0  | no  |
| ZPR1    | 0  | 1  | no  |
| ZSWIM6  | 0  | 1  | yes |
| ZSWIM7  | 0  | 5  | no  |
