# Supplementary material for: High-coverage nanopore sequencing of samples from the 1000 Genomes Project to build a comprehensive catalog of human genetic variation
Source: HighWire-hosted journal article supplement (doi:10.1101/gr.279273.124), 2024-10-02
Supplement: Supplemental_Tables.xlsx [file Supplemental_Tables.xlsx]

## Sheet: Table S1
Table S1. Demographics
Sample Name	Sex	Population code	Population name	Superpopulation code	Superpopulation name
GM18501	male	YRI	Yoruba	AFR	African Ancestry
GM18519	male	YRI	Yoruba	AFR	African Ancestry
GM18856	male	YRI	Yoruba	AFR	African Ancestry
GM18861	female	YRI	Yoruba	AFR	African Ancestry
GM18864	female	YRI	Yoruba	AFR	African Ancestry
GM18865	male	YRI	Yoruba	AFR	African Ancestry
GM18871	male	YRI	Yoruba	AFR	African Ancestry
GM18876	female	YRI	Yoruba	AFR	African Ancestry
GM18924	female	YRI	Yoruba	AFR	African Ancestry
GM19035	male	LWK	Luhya	AFR	African Ancestry
GM19041	male	LWK	Luhya	AFR	African Ancestry
GM19308	male	LWK	Luhya	AFR	African Ancestry
GM19312	male	LWK	Luhya	AFR	African Ancestry
GM19462	female	LWK	Luhya	AFR	African Ancestry
GM19471	female	LWK	Luhya	AFR	African Ancestry
GM19473	female	LWK	Luhya	AFR	African Ancestry
HG00105	male	GBR	British	EUR	European Ancestry
HG00110	female	GBR	British	EUR	European Ancestry
HG00121	female	GBR	British	EUR	European Ancestry
HG00127	female	GBR	British	EUR	European Ancestry
HG00136	male	GBR	British	EUR	European Ancestry
HG00151	male	GBR	British	EUR	European Ancestry
HG00331	female	FIN	Finnish	EUR	European Ancestry
HG00410	female	CHS	Southern Han Chinese	EAS	East Asian Ancestry
HG00473	female	CHS	Southern Han Chinese	EAS	East Asian Ancestry
HG00525	female	CHS	Southern Han Chinese	EAS	East Asian Ancestry
HG00599	female	CHS	Southern Han Chinese	EAS	East Asian Ancestry
HG00631	male	CHS	Southern Han Chinese	EAS	East Asian Ancestry
HG00675	female	CHS	Southern Han Chinese	EAS	East Asian Ancestry
HG00705	female	CHS	Southern Han Chinese	EAS	East Asian Ancestry
HG00706	male	CHS	Southern Han Chinese	EAS	East Asian Ancestry
HG00728	male	CHS	Southern Han Chinese	EAS	East Asian Ancestry
HG01046	female	CDX	Dai Chinese	EAS	East Asian Ancestry
HG01122	female	CLM	Colombian	AMR	American Ancestry
HG01281	female	CLM	Colombian	AMR	American Ancestry
HG01312	female	PUR	Puerto Rican	AMR	American Ancestry
HG01363	female	CLM	Colombian	AMR	American Ancestry
HG01369	female	CLM	Colombian	AMR	American Ancestry
HG01372	female	CLM	Colombian	AMR	American Ancestry
HG01395	male	PUR	Puerto Rican	AMR	American Ancestry
HG01414	female	PUR	Puerto Rican	AMR	American Ancestry
HG01468	female	CLM	Colombian	AMR	American Ancestry
HG01501	female	IBS	Iberian	EUR	European Ancestry
HG01615	male	IBS	Iberian	EUR	European Ancestry
HG01695	female	IBS	Iberian	EUR	European Ancestry
HG01790	female	GBR	British	EUR	European Ancestry
HG01797	female	CDX	Dai Chinese	EAS	East Asian Ancestry
HG01801	female	CDX	Dai Chinese	EAS	East Asian Ancestry
HG01812	female	CDX	Dai Chinese	EAS	East Asian Ancestry
HG01862	female	KHV	Kinh Vietnamese	EAS	East Asian Ancestry
HG02048	female	KHV	Kinh Vietnamese	EAS	East Asian Ancestry
HG02051	male	ACB	African Caribbean	AFR	African Ancestry
HG02102	female	PEL	Peruvian	AMR	American Ancestry
HG02185	female	CDX	Dai Chinese	EAS	East Asian Ancestry
HG02252	female	PEL	Peruvian	AMR	American Ancestry
HG02262	male	PEL	Peruvian	AMR	American Ancestry
HG02282	female	ACB	African Caribbean	AFR	African Ancestry
HG02312	female	PEL	Peruvian	AMR	American Ancestry
HG02345	female	PEL	Peruvian	AMR	American Ancestry
HG02373	male	CDX	Dai Chinese	EAS	East Asian Ancestry
HG02389	male	CDX	Dai Chinese	EAS	East Asian Ancestry
HG02396	male	CDX	Dai Chinese	EAS	East Asian Ancestry
HG02409	male	CDX	Dai Chinese	EAS	East Asian Ancestry
HG02502	female	ACB	African Caribbean	AFR	African Ancestry
HG02614	female	GWD	Gambian Mandinka	AFR	African Ancestry
HG02615	female	GWD	Gambian Mandinka	AFR	African Ancestry
HG02694	female	PJL	Punjabi	SAS	South Asian Ancestry
HG02731	female	PJL	Punjabi	SAS	South Asian Ancestry
HG02817	female	GWD	Gambian Mandinka	AFR	African Ancestry
HG02974	female	ESN	Esan	AFR	African Ancestry
HG02979	female	ESN	Esan	AFR	African Ancestry
HG03022	female	PJL	Punjabi	SAS	South Asian Ancestry
HG03069	male	MSL	Mende	AFR	African Ancestry
HG03120	male	ESN	Esan	AFR	African Ancestry
HG03121	female	ESN	Esan	AFR	African Ancestry
HG03168	female	ESN	Esan	AFR	African Ancestry
HG03279	female	ESN	Esan	AFR	African Ancestry
HG03499	female	ESN	Esan	AFR	African Ancestry
HG03548	female	MSL	Mende	AFR	African Ancestry
HG03563	female	MSL	Mende	AFR	African Ancestry
HG03571	male	MSL	Mende	AFR	African Ancestry
HG03631	female	PJL	Punjabi	SAS	South Asian Ancestry
HG03643	female	STU	Tamil	SAS	South Asian Ancestry
HG03646	male	STU	Tamil	SAS	South Asian Ancestry
HG03668	female	PJL	Punjabi	SAS	South Asian Ancestry
HG03717	female	ITU	Telugu	SAS	South Asian Ancestry
HG03731	female	ITU	Telugu	SAS	South Asian Ancestry
HG03744	male	STU	Tamil	SAS	South Asian Ancestry
HG03770	female	ITU	Telugu	SAS	South Asian Ancestry
HG03774	female	ITU	Telugu	SAS	South Asian Ancestry
HG03814	female	BEB	Bengali	SAS	South Asian Ancestry
HG03861	female	ITU	Telugu	SAS	South Asian Ancestry
HG03864	male	ITU	Telugu	SAS	South Asian Ancestry
HG03868	female	ITU	Telugu	SAS	South Asian Ancestry
HG03898	female	STU	Tamil	SAS	South Asian Ancestry
HG03919	female	BEB	Bengali	SAS	South Asian Ancestry
HG03971	male	ITU	Telugu	SAS	South Asian Ancestry
HG04054	female	ITU	Telugu	SAS	South Asian Ancestry
HG04063	female	ITU	Telugu	SAS	South Asian Ancestry
HG04216	female	ITU	Telugu	SAS	South Asian Ancestry

## Sheet: Table S2
Table S2. Sequencing statistics (Cramino)
Sample	Mean Length	Median Length	N50	N75	Number of Reads	Yeild (Gb)	Yield (Gb) >25kb	Estimated Depth of Coverage	Basecaller
GM18501	15151	2837	61903	29878	9173750	139	108.76	43	Guppy v6.4.6, v6.5.7 SUP
GM18519	17233	3830	58431	31250	8219329	141.65	112.81	44	Guppy v6.4.6 SUP
GM18856	9817	1946	56929	17695	14343524	140.81	99.55	44	Guppy v6.4.6, v6.5.7 SUP
GM18861	14030	3519	49448	22611	11637213	163.28	119.16	51	Guppy v6.4.6, v6.5.7 SUP
GM18864	8493	1458	44970	19272	19828740	168.42	118.56	53	Guppy v6.4.6 SUP
GM18865	16683	3754	54749	31302	10352760	172.72	137.66	54	Guppy v6.4.6, v6.5.7 SUP
GM18871	11264	2533	47959	20096	15540178	175.05	125.33	55	Guppy v6.4.6 SUP
GM18876	12962	2934	51996	22174	12401982	160.77	117.12	50	Guppy v6.4.6 SUP
GM18924	7161	1181	53144	16429	17710628	126.84	88.89	40	Guppy v6.3.2 SUP
GM19035	11252	2312	45872	19633	10275458	115.63	80.91	36	Guppy v6.4.6, v6.5.7 SUP
GM19041	16812	3593	57382	30268	8318960	139.86	110.6	44	Guppy v6.4.6, v6.5.7 SUP
GM19308	13797	3493	52978	21034	9841821	135.8	97.8	42	Guppy v6.4.6, v6.5.7 SUP
GM19312	11623	2174	49359	22674	13244467	153.95	112.39	48	Guppy v6.4.6, v6.5.7 SUP
GM19462	17058	3463	64385	33971	7822819	133.44	106.81	42	Guppy v6.3.2 SUP
GM19471	15769	3295	63993	29128	8757701	138.11	107.18	43	Guppy v6.3.2 SUP
GM19473	11392	2980	50931	15410	13362118	152.23	103.09	48	Guppy v6.3.2 SUP
HG00105	7369	1818	40842	8832	23256653	171.39	102.42	54	Guppy v6.4.6 SUP
HG00110	12641	2262.5	56062	24615	8048720	101.74	76	32	Guppy v6.3.2 SUP
HG00121	9834	1486	54227	21651	10660533	104.84	75.92	33	Guppy v6.3.2 SUP
HG00127	12153	2484	46431	20657	6638544	80.68	56.9	25	Guppy v6.3.2 SUP
HG00136	7694	2016	40283	8934	16872835	129.83	78.37	41	Guppy v6.4.6 SUP
HG00151	8647	1732	53167	14340	16112268	139.33	94.63	44	Guppy v6.4.6 SUP
HG00331	5602	1020	44115	9720	21261132	119.12	75.94	37	Guppy v6.3.7 SUP
HG00410	14446	2468	63425	32292	7728088	111.64	88.63	35	Guppy v6.3.2 SUP
HG00473	10447	2063	54689	20054	13631067	142.41	102.33	45	Guppy v6.4.6 SUP
HG00525	10495	2271	57244	16676	10566656	110.9	77.09	35	Guppy v6.4.6 SUP
HG00599	7884	1492	49029	15140	16038344	126.45	87.87	40	Guppy v6.3.7 SUP
HG00631	9693	2225	47590	15406	10375206	100.57	68.33	31	Guppy v6.4.6 SUP
HG00675	8509	1863	46090	13993	12693395	108.02	72.45	34	Guppy v6.3.2 SUP
HG00705	11365	2806	50237	17426	10409235	118.31	82.53	37	Guppy v6.3.7 SUP
HG00706	9349	1986	43678	15956	12042397	112.59	75.68	35	Guppy v6.3.2 SUP
HG00728	11412	2372	60526	21478	7713927	88.04	64.32	28	Guppy v6.4.6 SUP
HG01046	11175	2395	57349	20158	12508809	139.8	101.29	44	Guppy v6.4.6 SUP
HG01122	9626	1722	63432	20384	10261571	98.79	71.76	31	Guppy v6.3.2 SUP
HG01281	13755	2513	76930	28249	7492953	103.07	78.86	32	Guppy v6.3.2 SUP
HG01312	13986	3497	50713	22112	7869586	110.07	79.87	34	Guppy v6.3.7 SUP
HG01363	12403	2407	51506	25901	10329487	128.12	96.97	40	Guppy v6.3.7 SUP
HG01369	10930	2376	53685	19931	11886046	129.92	93.24	41	Guppy v6.4.6 SUP
HG01372	12500	2142	78283	28607	8621890	107.77	82.45	34	Guppy v6.3.2 SUP
HG01395	10825	2576	51643	16578	15016942	162.57	112.97	51	Guppy v6.4.6 SUP
HG01414	9844	2069	56136	16828	11969491	117.83	82.83	37	Guppy v6.3.2 SUP
HG01468	16522	2878	71324	34773	5149964	85.09	68.52	27	Guppy v6.3.2 SUP
HG01501	10827	2220	43751	19711	8794593	95.22	66.62	30	Guppy v6.3.7 SUP
HG01615	7057	1699	42315	8681	18893686	133.34	82.34	42	Guppy v6.4.6 SUP
HG01695	8119	2079	43014	9998	13050639	105.97	65.2	33	Guppy v6.3.2 SUP
HG01790	15916	1747	71617	41340	8040002	127.97	108.26	40	Guppy v6.3.2 SUP
HG01797	15047	3271	49577	25887	6343338	95.45	72.43	30	Guppy v6.3.2 SUP
HG01801	15864	4054	51500	25077	6136298	97.35	73.08	30	Guppy v6.3.2 SUP
HG01812	13327	2054	67015	35403	6454572	86.02	69.31	27	Guppy v6.3.2 SUP
HG01862	12118	2404	51432	23666	11286093	136.77	101.17	43	Guppy v6.3.7 SUP
HG02048	7741	1689	46855	10998	18047208	139.72	89.7	44	Guppy v6.4.6 SUP
HG02051	10030	2076	43371	17883	10167597	101.98	70.06	32	Guppy v6.3.7 SUP
HG02102	9508	1931	42146	16430	11150930	106.02	70.77	33	Guppy v6.3.7 SUP
HG02185	7718	1913	49582	8989	15279492	117.94	73.92	37	Guppy v6.4.6 SUP
HG02252	9452	2355	54928	11749	11264599	106.48	70.06	33	Guppy v6.3.2 SUP
HG02262	10864	2393	45062	17886	13066284	141.96	97.13	44	Guppy v6.5.7 SUP
HG02282	15152	3238	63902	28126	5999851	90.91	69.9	28	Guppy v6.3.2 SUP
HG02312	22096	8179	58675	30801	4566205	100.9	80.06	32	Guppy v6.3.7 SUP
HG02345	16305	3616	61434	28389	8289641	135.17	104.5	42	Guppy v6.4.6 SUP
HG02373	10411	2266	59588	18370	12409622	129.2	92.51	40	Guppy v6.4.6 SUP
HG02389	11362	2830	54679	16785	15095847	171.53	120.26	54	Guppy v6.4.6 SUP
HG02396	7928	1943	46808	10016	19222023	152.41	96.67	48	Guppy v6.4.6 SUP
HG02409	12675	2265	63928	28313	11585605	146.85	112.74	46	Guppy v6.4.6 SUP
HG02502	16766	3026	74233	36499	5572077	93.42	75.27	29	Guppy v6.3.2 SUP
HG02614	14170	2745	63987	29001	7145187	101.25	78.18	32	Guppy v6.3.7 SUP
HG02615	12498	2552	56404	22682	7744140	96.79	71.05	30	Guppy v6.3.7 SUP
HG02694	12219	2683	54754	22046	9221276	112.68	82.37	35	Guppy v6.3.7 SUP
HG02731	13384	2437	50670	28024	8494176	113.69	88.13	36	Guppy v6.3.7 SUP
HG02817	9977	2562	50724	12140	10171458	101.49	65.32	32	Guppy v6.3.2 SUP
HG02974	11324	1867	56313	26013	8927320	101.1	76.5	32	Guppy v6.3.7 SUP
HG02979	10622	1833	54860	22709	11462692	121.77	89.52	38	Guppy v6.3.7 SUP
HG03022	15311	2157	78873	39891	7234450	110.77	90.63	35	Guppy v6.3.2 SUP
HG03069	9685	1556	61592	20693	11655986	112.9	81.82	35	Guppy v6.3.2 SUP
HG03120	8381	1697	47924	14316	12131163	101.68	68.11	32	Guppy v6.3.7 SUP
HG03121	15946	3391	54000	29570	7591743	121.06	95.29	38	Guppy v6.3.7 SUP
HG03168	11779	2373	53810	21835	9241769	108.86	79.31	34	Guppy v6.3.7 SUP
HG03279	10934	2927	49735	13762	9047504	98.93	64.97	31	Guppy v6.3.2 SUP
HG03499	9429	2430	44553	12167	11652431	109.87	70.36	34	Guppy v6.3.7 SUP
HG03548	9331	2000	48038	14930	10119148	94.43	63.18	30	Guppy v6.3.2 SUP
HG03563	13268	3321	51850	21219	10340141	137.2	99.1	43	Guppy v6.4.6 SUP
HG03571	8030	1938	40519	10892	12724231	102.18	63.59	32	Guppy v6.3.2 SUP
HG03631	10376	2553	42845	15579	13941626	144.67	96.65	45	Guppy v6.3.7 SUP
HG03643	16600	2482	72536	40549	5509031	91.45	75.85	29	Guppy v6.4.6 SUP
HG03646	10329	1880	62692	20153	9478304	97.91	70.95	31	Guppy v6.4.6 SUP
HG03668	15927	2791	69733	32336	5887873	93.78	74.47	29	Guppy v6.3.2 SUP
HG03717	10776	2549	46944	16469	8993282	96.91	65.67	30	Guppy v6.3.2 SUP
HG03731	9055	2032	51215	12665	14696988	133.09	87.45	42	Guppy v6.4.6 SUP
HG03744	14249	2246	59788	33670	7480948	106.6	85.82	33	Guppy v6.4.6 SUP
HG03770	13116	2802	54418	23350	7681472	100.75	74.31	31	Guppy v6.3.2 SUP
HG03774	10009	2032	53176	16135	13065214	130.78	89.54	41	Guppy v6.4.6 SUP
HG03814	6817	1602	40146	8448	15567514	106.13	63.26	33	Guppy v6.4.6 SUP
HG03861	8233	1961	40573	11751	17457598	143.75	90.89	45	Guppy v6.3.7 SUP
HG03864	12176	2480	61519	22993	7720712	94.01	69.39	29	Guppy v6.4.6 SUP
HG03868	8443	2071	40709	11675	12488031	105.45	66	33	Guppy v6.3.2 SUP
HG03898	9379	2202	42821	13931	11563097	108.46	70.82	34	Guppy v6.3.7 SUP
HG03919	7373	1851	48795	8196	13879707	102.35	62.54	32	Guppy v6.4.6 SUP
HG03971	9617	2021	46929	15972	12039691	115.8	78.41	36	Guppy v6.4.6 SUP
HG04054	9140	1755	52526	18469	10989127	100.45	71.13	31	Guppy v6.3.7 SUP
HG04063	9183	1796	50226	16945	10973296	100.77	69.66	31	Guppy v6.3.2 SUP
HG04216	12907	3133	51741	20189	8601974	111.03	79.02	35	Guppy v6.3.2 SUP

## Sheet: Table S3
Table S3. Downsampled benchmarking sample statistics
Sample	Mean_length	Median_length	N50	N75	Number_of_reads	Yield_Gb	Yield_GB_gt25kb	Est. Coverage	hapdiff_CARD_SVs (preprocessed)	sniffles2_CARD_SVs (preprocessed)	cutesv_minimap2_SVs (preprocessed)	sniffles2_minimap2_SVs (preprocessed)	svim_minimap_SVs (preprocessed)
GM24143_downsampled	9836	777	47657	21893	10268537	101.01	72.69	31.5656	24592	22887	21722	23929	21492
GM24149_downsampled	11734	2158	44418	19843	8395736	98.52	68.25	30.7875	24415	22670	21477	23638	21020
GM24385_downsampled	8429	488	49683	19819	12573068	105.99	74.47	33.1219	24588	22732	21568	23701	21292
HG00733_downsampled	7958	1868	30350	11625	12527611	99.7	55.49	31.1562	24492	22531	21002	23550	20017
HG02723_downsampled	9228	356	51009	24747	10814439	99.81	74.62	31.1906	28421	26203	24553	27357	23966

## Sheet: Table S4
Table S4. Benchmarking SNP/indel calls from 5 high quality ONT samples to orthogonal PacBio sequencing data
sample	truth	query	mask	indel_snv	metric	value
HG002	GIAB	clair3	GIAB_HG002	indel	f1	0.730613
HG002	GIAB	clair3	GIAB_HG002_HP	indel	f1	0.899891
HG002	GIAB	PMDV	GIAB_HG002	indel	f1	0.7365
HG002	GIAB	PMDV	GIAB_HG002_HP	indel	f1	0.916881
HG002	HPRC	clair3	GIAB_HG002	indel	f1	0.731391
HG002	HPRC	clair3	GIAB_HG002_HP	indel	f1	0.900578
HG002	HPRC	PMDV	GIAB_HG002	indel	f1	0.737061
HG002	HPRC	PMDV	GIAB_HG002_HP	indel	f1	0.917007
HG003	GIAB	clair3	GIAB_HG002	indel	f1	0.734117
HG003	GIAB	clair3	GIAB_HG002_HP	indel	f1	0.879535
HG003	GIAB	PMDV	GIAB_HG002	indel	f1	0.741076
HG003	GIAB	PMDV	GIAB_HG002_HP	indel	f1	0.90312
HG004	GIAB	clair3	GIAB_HG002	indel	f1	0.722677
HG004	GIAB	clair3	GIAB_HG002_HP	indel	f1	0.87524
HG004	GIAB	PMDV	GIAB_HG002	indel	f1	0.730182
HG004	GIAB	PMDV	GIAB_HG002_HP	indel	f1	0.898411
HG00733	HPRC	clair3	GIAB_HG002	indel	f1	0.699417
HG00733	HPRC	clair3	GIAB_HG002_HP	indel	f1	0.874783
HG00733	HPRC	GATK	GIAB_HG002	indel	f1	0.937451
HG00733	HPRC	GATK	GIAB_HG002_HP	indel	f1	0.91451
HG00733	HPRC	PMDV	GIAB_HG002	indel	f1	0.70529
HG00733	HPRC	PMDV	GIAB_HG002_HP	indel	f1	0.890741
HG02723	HPRC	clair3	GIAB_HG002	indel	f1	0.707758
HG02723	HPRC	clair3	GIAB_HG002_HP	indel	f1	0.880684
HG02723	HPRC	GATK	GIAB_HG002	indel	f1	0.933519
HG02723	HPRC	GATK	GIAB_HG002_HP	indel	f1	0.903005
HG02723	HPRC	PMDV	GIAB_HG002	indel	f1	0.706899
HG02723	HPRC	PMDV	GIAB_HG002_HP	indel	f1	0.892606
HG002	GIAB	clair3	GIAB_HG002	snv	f1	0.991026
HG002	GIAB	clair3	GIAB_HG002_HP	snv	f1	0.992556
HG002	GIAB	PMDV	GIAB_HG002	snv	f1	0.992529
HG002	GIAB	PMDV	GIAB_HG002_HP	snv	f1	0.994124
HG002	HPRC	clair3	GIAB_HG002	snv	f1	0.993072
HG002	HPRC	clair3	GIAB_HG002_HP	snv	f1	0.99476
HG002	HPRC	PMDV	GIAB_HG002	snv	f1	0.994319
HG002	HPRC	PMDV	GIAB_HG002_HP	snv	f1	0.996111
HG003	GIAB	clair3	GIAB_HG002	snv	f1	0.984739
HG003	GIAB	clair3	GIAB_HG002_HP	snv	f1	0.986909
HG003	GIAB	PMDV	GIAB_HG002	snv	f1	0.986806
HG003	GIAB	PMDV	GIAB_HG002_HP	snv	f1	0.988911
HG004	GIAB	clair3	GIAB_HG002	snv	f1	0.985135
HG004	GIAB	clair3	GIAB_HG002_HP	snv	f1	0.987489
HG004	GIAB	PMDV	GIAB_HG002	snv	f1	0.987296
HG004	GIAB	PMDV	GIAB_HG002_HP	snv	f1	0.989524
HG00733	HPRC	clair3	GIAB_HG002	snv	f1	0.989221
HG00733	HPRC	clair3	GIAB_HG002_HP	snv	f1	0.991495
HG00733	HPRC	GATK	GIAB_HG002	snv	f1	0.985725
HG00733	HPRC	GATK	GIAB_HG002_HP	snv	f1	0.986088
HG00733	HPRC	PMDV	GIAB_HG002	snv	f1	0.991623
HG00733	HPRC	PMDV	GIAB_HG002_HP	snv	f1	0.994054
HG02723	HPRC	clair3	GIAB_HG002	snv	f1	0.990556
HG02723	HPRC	clair3	GIAB_HG002_HP	snv	f1	0.992825
HG02723	HPRC	GATK	GIAB_HG002	snv	f1	0.984577
HG02723	HPRC	GATK	GIAB_HG002_HP	snv	f1	0.984934
HG02723	HPRC	PMDV	GIAB_HG002	snv	f1	0.990737
HG02723	HPRC	PMDV	GIAB_HG002_HP	snv	f1	0.993178
HG002	GIAB	clair3	GIAB_HG002	indel	precision	0.859757
HG002	GIAB	clair3	GIAB_HG002_HP	indel	precision	0.91689
HG002	GIAB	PMDV	GIAB_HG002	indel	precision	0.835164
HG002	GIAB	PMDV	GIAB_HG002_HP	indel	precision	0.931569
HG002	HPRC	clair3	GIAB_HG002	indel	precision	0.862985
HG002	HPRC	clair3	GIAB_HG002_HP	indel	precision	0.921098
HG002	HPRC	PMDV	GIAB_HG002	indel	precision	0.837848
HG002	HPRC	PMDV	GIAB_HG002_HP	indel	precision	0.935177
HG003	GIAB	clair3	GIAB_HG002	indel	precision	0.819871
HG003	GIAB	clair3	GIAB_HG002_HP	indel	precision	0.865131
HG003	GIAB	PMDV	GIAB_HG002	indel	precision	0.802019
HG003	GIAB	PMDV	GIAB_HG002_HP	indel	precision	0.89257
HG004	GIAB	clair3	GIAB_HG002	indel	precision	0.809304
HG004	GIAB	clair3	GIAB_HG002_HP	indel	precision	0.861655
HG004	GIAB	PMDV	GIAB_HG002	indel	precision	0.793927
HG004	GIAB	PMDV	GIAB_HG002_HP	indel	precision	0.888263
HG00733	HPRC	clair3	GIAB_HG002	indel	precision	0.843553
HG00733	HPRC	clair3	GIAB_HG002_HP	indel	precision	0.903888
HG00733	HPRC	GATK	GIAB_HG002	indel	precision	0.970556
HG00733	HPRC	GATK	GIAB_HG002_HP	indel	precision	0.964021
HG00733	HPRC	PMDV	GIAB_HG002	indel	precision	0.826951
HG00733	HPRC	PMDV	GIAB_HG002_HP	indel	precision	0.924164
HG02723	HPRC	clair3	GIAB_HG002	indel	precision	0.862665
HG02723	HPRC	clair3	GIAB_HG002_HP	indel	precision	0.907703
HG02723	HPRC	GATK	GIAB_HG002	indel	precision	0.967495
HG02723	HPRC	GATK	GIAB_HG002_HP	indel	precision	0.95155
HG02723	HPRC	PMDV	GIAB_HG002	indel	precision	0.838479
HG02723	HPRC	PMDV	GIAB_HG002_HP	indel	precision	0.932429
HG002	GIAB	clair3	GIAB_HG002	snv	precision	0.988852
HG002	GIAB	clair3	GIAB_HG002_HP	snv	precision	0.990226
HG002	GIAB	PMDV	GIAB_HG002	snv	precision	0.990971
HG002	GIAB	PMDV	GIAB_HG002_HP	snv	precision	0.99191
HG002	HPRC	clair3	GIAB_HG002	snv	precision	0.99457
HG002	HPRC	clair3	GIAB_HG002_HP	snv	precision	0.996136
HG002	HPRC	PMDV	GIAB_HG002	snv	precision	0.996483
HG002	HPRC	PMDV	GIAB_HG002_HP	snv	precision	0.99763
HG003	GIAB	clair3	GIAB_HG002	snv	precision	0.976196
HG003	GIAB	clair3	GIAB_HG002_HP	snv	precision	0.979237
HG003	GIAB	PMDV	GIAB_HG002	snv	precision	0.979208
HG003	GIAB	PMDV	GIAB_HG002_HP	snv	precision	0.981639
HG004	GIAB	clair3	GIAB_HG002	snv	precision	0.976242
HG004	GIAB	clair3	GIAB_HG002_HP	snv	precision	0.979392
HG004	GIAB	PMDV	GIAB_HG002	snv	precision	0.979705
HG004	GIAB	PMDV	GIAB_HG002_HP	snv	precision	0.9821
HG00733	HPRC	clair3	GIAB_HG002	snv	precision	0.992601
HG00733	HPRC	clair3	GIAB_HG002_HP	snv	precision	0.994658
HG00733	HPRC	GATK	GIAB_HG002	snv	precision	0.998055
HG00733	HPRC	GATK	GIAB_HG002_HP	snv	precision	0.998285
HG00733	HPRC	PMDV	GIAB_HG002	snv	precision	0.995392
HG00733	HPRC	PMDV	GIAB_HG002_HP	snv	precision	0.996847
HG02723	HPRC	clair3	GIAB_HG002	snv	precision	0.9912
HG02723	HPRC	clair3	GIAB_HG002_HP	snv	precision	0.993363
HG02723	HPRC	GATK	GIAB_HG002	snv	precision	0.996777
HG02723	HPRC	GATK	GIAB_HG002_HP	snv	precision	0.996964
HG02723	HPRC	PMDV	GIAB_HG002	snv	precision	0.994301
HG02723	HPRC	PMDV	GIAB_HG002_HP	snv	precision	0.995834
HG002	GIAB	clair3	GIAB_HG002	indel	recall	0.635199
HG002	GIAB	clair3	GIAB_HG002_HP	indel	recall	0.883511
HG002	GIAB	PMDV	GIAB_HG002	indel	recall	0.658684
HG002	GIAB	PMDV	GIAB_HG002_HP	indel	recall	0.902648
HG002	HPRC	clair3	GIAB_HG002	indel	recall	0.63462
HG002	HPRC	clair3	GIAB_HG002_HP	indel	recall	0.880952
HG002	HPRC	PMDV	GIAB_HG002	indel	recall	0.657918
HG002	HPRC	PMDV	GIAB_HG002_HP	indel	recall	0.89953
HG003	GIAB	clair3	GIAB_HG002	indel	recall	0.664603
HG003	GIAB	clair3	GIAB_HG002_HP	indel	recall	0.894426
HG003	GIAB	PMDV	GIAB_HG002	indel	recall	0.688741
HG003	GIAB	PMDV	GIAB_HG002_HP	indel	recall	0.913923
HG004	GIAB	clair3	GIAB_HG002	indel	recall	0.652801
HG004	GIAB	clair3	GIAB_HG002_HP	indel	recall	0.88926
HG004	GIAB	PMDV	GIAB_HG002	indel	recall	0.675912
HG004	GIAB	PMDV	GIAB_HG002_HP	indel	recall	0.908794
HG00733	HPRC	clair3	GIAB_HG002	indel	recall	0.597349
HG00733	HPRC	clair3	GIAB_HG002_HP	indel	recall	0.847494
HG00733	HPRC	GATK	GIAB_HG002	indel	recall	0.90653
HG00733	HPRC	GATK	GIAB_HG002_HP	indel	recall	0.869836
HG00733	HPRC	PMDV	GIAB_HG002	indel	recall	0.614836
HG00733	HPRC	PMDV	GIAB_HG002_HP	indel	recall	0.859651
HG02723	HPRC	clair3	GIAB_HG002	indel	recall	0.600014
HG02723	HPRC	clair3	GIAB_HG002_HP	indel	recall	0.855227
HG02723	HPRC	GATK	GIAB_HG002	indel	recall	0.901849
HG02723	HPRC	GATK	GIAB_HG002_HP	indel	recall	0.859173
HG02723	HPRC	PMDV	GIAB_HG002	indel	recall	0.611014
HG02723	HPRC	PMDV	GIAB_HG002_HP	indel	recall	0.856044
HG002	GIAB	clair3	GIAB_HG002	snv	recall	0.993209
HG002	GIAB	clair3	GIAB_HG002_HP	snv	recall	0.994896
HG002	GIAB	PMDV	GIAB_HG002	snv	recall	0.994093
HG002	GIAB	PMDV	GIAB_HG002_HP	snv	recall	0.996349
HG002	HPRC	clair3	GIAB_HG002	snv	recall	0.991578
HG002	HPRC	clair3	GIAB_HG002_HP	snv	recall	0.993389
HG002	HPRC	PMDV	GIAB_HG002	snv	recall	0.992164
HG002	HPRC	PMDV	GIAB_HG002_HP	snv	recall	0.994598
HG003	GIAB	clair3	GIAB_HG002	snv	recall	0.993432
HG003	GIAB	clair3	GIAB_HG002_HP	snv	recall	0.994701
HG003	GIAB	PMDV	GIAB_HG002	snv	recall	0.994522
HG003	GIAB	PMDV	GIAB_HG002_HP	snv	recall	0.996291
HG004	GIAB	clair3	GIAB_HG002	snv	recall	0.994192
HG004	GIAB	clair3	GIAB_HG002_HP	snv	recall	0.99572
HG004	GIAB	PMDV	GIAB_HG002	snv	recall	0.995006
HG004	GIAB	PMDV	GIAB_HG002_HP	snv	recall	0.99706
HG00733	HPRC	clair3	GIAB_HG002	snv	recall	0.985864
HG00733	HPRC	clair3	GIAB_HG002_HP	snv	recall	0.988352
HG00733	HPRC	GATK	GIAB_HG002	snv	recall	0.973697
HG00733	HPRC	GATK	GIAB_HG002_HP	snv	recall	0.974186
HG00733	HPRC	PMDV	GIAB_HG002	snv	recall	0.987882
HG00733	HPRC	PMDV	GIAB_HG002_HP	snv	recall	0.991276
HG02723	HPRC	clair3	GIAB_HG002	snv	recall	0.989913
HG02723	HPRC	clair3	GIAB_HG002_HP	snv	recall	0.992288
HG02723	HPRC	GATK	GIAB_HG002	snv	recall	0.972673
HG02723	HPRC	GATK	GIAB_HG002_HP	snv	recall	0.973191
HG02723	HPRC	PMDV	GIAB_HG002	snv	recall	0.987198
HG02723	HPRC	PMDV	GIAB_HG002_HP	snv	recall	0.990536

## Sheet: Table S5
Table S5. Benchmarking SNP/indel calls from each (n=100) ONT sample to orthogonal Illumina short-read WGS data
sample_ID	truth	query	mask	truth_indels	truth_SNVS	query_indels	query_SNVS	indel_recall	SNV_recall	indel_precision	SNV_precision	indel_F1	SNV_F1
GM18501	NYGC_Illumina	clair3	HG002_hiconf_HP	295059	3466878	306623	3548760	0.881366	0.992393	0.834915	0.97001	0.857512	0.981074
GM18519	NYGC_Illumina	clair3	HG002_hiconf_HP	291396	3455775	305292	3541262	0.881121	0.993196	0.828201	0.969738	0.853841	0.981327
GM18856	NYGC_Illumina	clair3	HG002_hiconf_HP	293235	3468442	303578	3539102	0.873525	0.989865	0.831345	0.970571	0.851913	0.980123
GM18861	NYGC_Illumina	clair3	HG002_hiconf_HP	294050	3480895	308210	3557185	0.887176	0.992028	0.83325	0.971252	0.859368	0.98153
GM18864	NYGC_Illumina	clair3	HG002_hiconf_HP	292376	3462502	305417	3543174	0.882802	0.990762	0.832036	0.96867	0.856667	0.979592
GM18865	NYGC_Illumina	clair3	HG002_hiconf_HP	292727	3450027	306472	3541799	0.882563	0.993909	0.829759	0.968668	0.855347	0.981126
GM18871	NYGC_Illumina	clair3	HG002_hiconf_HP	293620	3466852	305677	3544863	0.881994	0.992144	0.834332	0.97079	0.857501	0.981351
GM18876	NYGC_Illumina	clair3	HG002_hiconf_HP	292625	3455622	306285	3532286	0.886599	0.992021	0.833825	0.971004	0.859402	0.9814
GM18924	NYGC_Illumina	clair3	HG002_hiconf_HP	291536	3453857	302112	3512885	0.877765	0.98659	0.83482	0.970441	0.855754	0.978449
GM19035	NYGC_Illumina	clair3	HG002_hiconf_HP	291289	3446817	303060	3536733	0.869806	0.990162	0.823883	0.965455	0.846222	0.977653
GM19041	NYGC_Illumina	clair3	HG002_hiconf_HP	289937	3446369	306179	3552813	0.882302	0.992926	0.82325	0.963686	0.851754	0.978087
GM19308	NYGC_Illumina	clair3	HG002_hiconf_HP	292211	3462857	306764	3559469	0.880511	0.992019	0.826065	0.965597	0.852419	0.97863
GM19312	NYGC_Illumina	clair3	HG002_hiconf_HP	290133	3447960	304406	3537221	0.880217	0.991594	0.826255	0.967063	0.852383	0.979175
GM19462	NYGC_Illumina	clair3	HG002_hiconf_HP	292317	3460375	306752	3553464	0.880736	0.989417	0.82642	0.963998	0.852714	0.976542
GM19471	NYGC_Illumina	clair3	HG002_hiconf_HP	291535	3454966	307989	3556101	0.884621	0.992303	0.824581	0.964593	0.853547	0.978252
GM19473	NYGC_Illumina	clair3	HG002_hiconf_HP	291056	3452829	307958	3554031	0.886132	0.991205	0.824947	0.96346	0.854445	0.977136
HG00105	NYGC_Illumina	clair3	HG002_hiconf_HP	233665	2807281	247565	2862042	0.899754	0.98886	0.83824	0.970278	0.867909	0.979481
HG00110	NYGC_Illumina	clair3	HG002_hiconf_HP	231296	2778235	243310	2843724	0.882977	0.991801	0.829411	0.969335	0.855356	0.980439
HG00121	NYGC_Illumina	clair3	HG002_hiconf_HP	232027	2787563	242401	2849301	0.883242	0.990653	0.834852	0.969547	0.858366	0.979986
HG00127	NYGC_Illumina	clair3	HG002_hiconf_HP	232939	2790795	243696	2856007	0.872671	0.990379	0.824618	0.968128	0.847964	0.979127
HG00136	NYGC_Illumina	clair3	HG002_hiconf_HP	233511	2804904	245882	2853304	0.88989	0.986243	0.834677	0.969842	0.861399	0.977974
HG00151	NYGC_Illumina	clair3	HG002_hiconf_HP	233622	2797732	245886	2855323	0.893413	0.989457	0.837787	0.969831	0.864706	0.979546
HG00331	NYGC_Illumina	clair3	HG002_hiconf_HP	234535	2810057	245379	2847559	0.88568	0.983373	0.835903	0.970752	0.860072	0.977022
HG00410	NYGC_Illumina	clair3	HG002_hiconf_HP	236205	2820563	249329	2905519	0.886975	0.992999	0.829089	0.964398	0.857056	0.97849
HG00473	NYGC_Illumina	clair3	HG002_hiconf_HP	237244	2833988	250833	2899193	0.893641	0.990722	0.83359	0.968852	0.862572	0.979665
HG00525	NYGC_Illumina	clair3	HG002_hiconf_HP	234263	2800056	247107	2866945	0.885944	0.990311	0.829038	0.9676	0.856547	0.978824
HG00599	NYGC_Illumina	clair3	HG002_hiconf_HP	236341	2809330	248526	2880553	0.890743	0.988705	0.835261	0.964635	0.86211	0.976522
HG00631	NYGC_Illumina	clair3	HG002_hiconf_HP	235313	2807826	245479	2880397	0.874988	0.989276	0.828136	0.964758	0.850917	0.976863
HG00675	NYGC_Illumina	clair3	HG002_hiconf_HP	236694	2824604	246579	2891256	0.875307	0.987511	0.829345	0.965144	0.851706	0.976199
HG00705	NYGC_Illumina	clair3	HG002_hiconf_HP	234822	2803650	247494	2871475	0.888652	0.990899	0.831968	0.967893	0.859376	0.979261
HG00706	NYGC_Illumina	clair3	HG002_hiconf_HP	235741	2824160	247204	2878946	0.884619	0.990417	0.832555	0.971972	0.857798	0.981107
HG00728	NYGC_Illumina	clair3	HG002_hiconf_HP	235841	2803539	245631	2879504	0.86842	0.990369	0.823243	0.964614	0.845228	0.977322
HG01046	NYGC_Illumina	clair3	HG002_hiconf_HP	234441	2799772	247569	2871699	0.892668	0.991723	0.834204	0.967265	0.862446	0.979341
HG01122	NYGC_Illumina	clair3	HG002_hiconf_HP	242105	2891589	251883	2958918	0.875356	0.988421	0.831199	0.966259	0.852706	0.977214
HG01281	NYGC_Illumina	clair3	HG002_hiconf_HP	239379	2873770	250278	2945883	0.88174	0.991674	0.832994	0.967766	0.856674	0.979574
HG01312	NYGC_Illumina	clair3	HG002_hiconf_HP	246230	2945114	259251	3015587	0.893413	0.991827	0.837227	0.969039	0.864408	0.980301
HG01363	NYGC_Illumina	clair3	HG002_hiconf_HP	250547	2993226	264053	3065948	0.893321	0.991798	0.836105	0.968667	0.863767	0.980097
HG01369	NYGC_Illumina	clair3	HG002_hiconf_HP	244770	2919223	257601	2990263	0.888912	0.991029	0.833537	0.96785	0.860334	0.979302
HG01372	NYGC_Illumina	clair3	HG002_hiconf_HP	239410	2873499	251044	2942072	0.887102	0.991473	0.835614	0.968728	0.860589	0.979969
HG01395	NYGC_Illumina	clair3	HG002_hiconf_HP	240566	2886042	253863	2950464	0.897192	0.99181	0.838976	0.970502	0.867108	0.98104
HG01414	NYGC_Illumina	clair3	HG002_hiconf_HP	247130	2960287	259025	3023084	0.886194	0.989402	0.834634	0.969215	0.859641	0.979204
HG01468	NYGC_Illumina	clair3	HG002_hiconf_HP	232426	2797453	243572	2869066	0.871344	0.991942	0.821794	0.967564	0.845844	0.979602
HG01501	NYGC_Illumina	clair3	HG002_hiconf_HP	236405	2838888	245600	2888431	0.873349	0.987465	0.83066	0.970865	0.851469	0.979095
HG01615	NYGC_Illumina	clair3	HG002_hiconf_HP	235444	2826687	246953	2870397	0.886695	0.985556	0.834823	0.970873	0.859977	0.97816
HG01695	NYGC_Illumina	clair3	HG002_hiconf_HP	237635	2850983	247839	2900956	0.881293	0.986856	0.834578	0.970187	0.8573	0.97845
HG01790	NYGC_Illumina	clair3	HG002_hiconf_HP	233481	2798719	247758	2875531	0.895782	0.99451	0.833479	0.968297	0.863508	0.981228
HG01797	NYGC_Illumina	clair3	HG002_hiconf_HP	234976	2808787	247109	2884798	0.876472	0.991024	0.822997	0.965328	0.848893	0.978007
HG01801	NYGC_Illumina	clair3	HG002_hiconf_HP	235824	2813977	248045	2890300	0.880419	0.991921	0.82662	0.966132	0.852672	0.978856
HG01812	NYGC_Illumina	clair3	HG002_hiconf_HP	234798	2802026	244256	2878681	0.868491	0.992222	0.824528	0.9662	0.845939	0.979038
HG01862	NYGC_Illumina	clair3	HG002_hiconf_HP	236390	2816825	250451	2895941	0.894378	0.992457	0.83261	0.965738	0.862389	0.978915
HG02048	NYGC_Illumina	clair3	HG002_hiconf_HP	235787	2811828	247793	2873229	0.887593	0.987632	0.833793	0.966897	0.859852	0.977154
HG02051	NYGC_Illumina	clair3	HG002_hiconf_HP	292180	3461049	304163	3538064	0.874013	0.989339	0.827408	0.968283	0.850072	0.978698
HG02102	NYGC_Illumina	clair3	HG002_hiconf_HP	231331	2757482	243603	2827151	0.889237	0.990282	0.833483	0.9663	0.860458	0.978144
HG02185	NYGC_Illumina	clair3	HG002_hiconf_HP	235025	2804911	246612	2865467	0.880077	0.986989	0.827746	0.96652	0.853109	0.976647
HG02252	NYGC_Illumina	clair3	HG002_hiconf_HP	235423	2808395	246036	2879144	0.881656	0.988702	0.832764	0.96475	0.856513	0.976579
HG02262	NYGC_Illumina	clair3	HG002_hiconf_HP	231795	2773725	244608	2846484	0.890761	0.99131	0.833096	0.966339	0.860964	0.978665
HG02282	NYGC_Illumina	clair3	HG002_hiconf_HP	286000	3396441	295733	3474416	0.865979	0.991055	0.826391	0.969296	0.845722	0.980055
HG02312	NYGC_Illumina	clair3	HG002_hiconf_HP	236789	2829385	250168	2912345	0.893973	0.993945	0.835343	0.966034	0.863664	0.97979
HG02345	NYGC_Illumina	clair3	HG002_hiconf_HP	243771	2911901	257516	2995354	0.894503	0.993786	0.835063	0.966493	0.863762	0.97995
HG02373	NYGC_Illumina	clair3	HG002_hiconf_HP	236647	2814915	248730	2887616	0.887271	0.990598	0.832393	0.96607	0.858956	0.97818
HG02389	NYGC_Illumina	clair3	HG002_hiconf_HP	234553	2804938	248466	2881629	0.898321	0.993023	0.836118	0.967007	0.866105	0.979843
HG02396	NYGC_Illumina	clair3	HG002_hiconf_HP	235502	2804782	248528	2866899	0.889844	0.988824	0.832148	0.96778	0.860029	0.978189
HG02409	NYGC_Illumina	clair3	HG002_hiconf_HP	235319	2816643	249339	2896478	0.894445	0.992789	0.832329	0.965846	0.86227	0.979132
HG02502	NYGC_Illumina	clair3	HG002_hiconf_HP	285901	3392408	298035	3481617	0.873694	0.992126	0.826326	0.9672	0.84935	0.979504
HG02614	NYGC_Illumina	clair3	HG002_hiconf_HP	290373	3443924	304069	3525733	0.880505	0.990634	0.828125	0.968173	0.853512	0.979275
HG02615	NYGC_Illumina	clair3	HG002_hiconf_HP	289548	3445741	302961	3511353	0.882586	0.990427	0.830995	0.972434	0.856014	0.981348
HG02694	NYGC_Illumina	clair3	HG002_hiconf_HP	232802	2788704	245635	2856708	0.886612	0.991676	0.829633	0.968456	0.857177	0.979929
HG02731	NYGC_Illumina	clair3	HG002_hiconf_HP	242700	2894165	255388	2971554	0.89026	0.992459	0.834507	0.96702	0.861482	0.979574
HG02817	NYGC_Illumina	clair3	HG002_hiconf_HP	290057	3447370	300843	3514761	0.87096	0.987846	0.827707	0.9694	0.848783	0.978536
HG02974	NYGC_Illumina	clair3	HG002_hiconf_HP	291144	3458230	303658	3533418	0.87747	0.990083	0.828873	0.969504	0.852479	0.979685
HG02979	NYGC_Illumina	clair3	HG002_hiconf_HP	292427	3454745	305935	3528143	0.881878	0.99043	0.829843	0.97036	0.85507	0.980292
HG03022	NYGC_Illumina	clair3	HG002_hiconf_HP	234364	2800973	247767	2880682	0.887295	0.99378	0.82869	0.966693	0.856992	0.980049
HG03069	NYGC_Illumina	clair3	HG002_hiconf_HP	296129	3498676	308105	3579658	0.872502	0.989248	0.825988	0.967368	0.848608	0.978186
HG03120	NYGC_Illumina	clair3	HG002_hiconf_HP	293907	3470821	304762	3529114	0.872967	0.986353	0.829818	0.970498	0.850846	0.978361
HG03121	NYGC_Illumina	clair3	HG002_hiconf_HP	291896	3458709	305232	3537362	0.882633	0.992108	0.831243	0.970551	0.856168	0.981211
HG03168	NYGC_Illumina	clair3	HG002_hiconf_HP	290976	3447668	303590	3520720	0.880502	0.990324	0.831345	0.970276	0.855218	0.980198
HG03279	NYGC_Illumina	clair3	HG002_hiconf_HP	292592	3456736	303362	3531167	0.868329	0.988405	0.825687	0.968067	0.846471	0.97813
HG03499	NYGC_Illumina	clair3	HG002_hiconf_HP	293290	3455853	305112	3521395	0.875642	0.987002	0.829397	0.969132	0.851892	0.977985
HG03548	NYGC_Illumina	clair3	HG002_hiconf_HP	295295	3500841	306386	3577378	0.865961	0.987521	0.822557	0.966885	0.843701	0.977094
HG03563	NYGC_Illumina	clair3	HG002_hiconf_HP	293262	3479218	308539	3570733	0.882047	0.991631	0.825393	0.966695	0.85278	0.979004
HG03571	NYGC_Illumina	clair3	HG002_hiconf_HP	293909	3479376	304957	3547989	0.866295	0.985612	0.823093	0.966987	0.844142	0.976211
HG03631	NYGC_Illumina	clair3	HG002_hiconf_HP	240084	2876146	251215	2937775	0.88352	0.986993	0.833234	0.966605	0.857641	0.976693
HG03643	NYGC_Illumina	clair3	HG002_hiconf_HP	239751	2869013	251725	2949291	0.884326	0.993082	0.831534	0.966436	0.857118	0.979578
HG03646	NYGC_Illumina	clair3	HG002_hiconf_HP	240748	2873427	252554	2948663	0.885328	0.990235	0.832673	0.965341	0.858194	0.977629
HG03668	NYGC_Illumina	clair3	HG002_hiconf_HP	241441	2894356	252235	2966401	0.881375	0.992509	0.83268	0.9688	0.856336	0.980511
HG03717	NYGC_Illumina	clair3	HG002_hiconf_HP	240273	2871372	251278	2937068	0.873311	0.989632	0.824839	0.967877	0.848383	0.978634
HG03731	NYGC_Illumina	clair3	HG002_hiconf_HP	240671	2875728	253909	2938327	0.89501	0.988167	0.836969	0.9675	0.865017	0.977724
HG03744	NYGC_Illumina	clair3	HG002_hiconf_HP	241821	2893997	254722	2979265	0.888413	0.992483	0.832551	0.96446	0.859575	0.978271
HG03770	NYGC_Illumina	clair3	HG002_hiconf_HP	239318	2859315	251966	2938445	0.880506	0.99125	0.825889	0.964947	0.852324	0.977922
HG03774	NYGC_Illumina	clair3	HG002_hiconf_HP	240249	2871402	252520	2939723	0.891275	0.990707	0.836358	0.968064	0.862944	0.979255
HG03814	NYGC_Illumina	clair3	HG002_hiconf_HP	240221	2871464	250671	2917009	0.877405	0.98367	0.829897	0.968699	0.85299	0.976127
HG03861	NYGC_Illumina	clair3	HG002_hiconf_HP	239244	2861084	251969	2917601	0.891103	0.988783	0.834575	0.970014	0.861913	0.979309
HG03864	NYGC_Illumina	clair3	HG002_hiconf_HP	240087	2865461	251137	2938517	0.881514	0.990959	0.832159	0.966706	0.856126	0.978682
HG03868	NYGC_Illumina	clair3	HG002_hiconf_HP	239183	2862436	249871	2923441	0.876923	0.987192	0.828604	0.966966	0.852079	0.976974
HG03898	NYGC_Illumina	clair3	HG002_hiconf_HP	237079	2839851	249185	2901735	0.880681	0.988904	0.827542	0.968172	0.853285	0.978428
HG03919	NYGC_Illumina	clair3	HG002_hiconf_HP	242204	2883865	252772	2939546	0.879052	0.984483	0.831508	0.966218	0.85462	0.975265
HG03971	NYGC_Illumina	clair3	HG002_hiconf_HP	242058	2897026	253808	2964848	0.886283	0.989302	0.834134	0.967036	0.859419	0.978042
HG04054	NYGC_Illumina	clair3	HG002_hiconf_HP	240258	2871698	251962	2935348	0.882655	0.98892	0.831121	0.967851	0.856114	0.978272
HG04063	NYGC_Illumina	clair3	HG002_hiconf_HP	240240	2869097	251761	2931884	0.877402	0.988638	0.826744	0.967836	0.85132	0.978127
HG04216	NYGC_Illumina	clair3	HG002_hiconf_HP	240987	2878546	253110	2953662	0.881313	0.990964	0.828015	0.96614	0.853833	0.978395
GM18501	NYGC_Illumina	PMDV	HG002_hiconf_HP	295059	3466878	301079	3544523	0.896343	0.993964	0.863939	0.972457	0.879843	0.983093
GM18519	NYGC_Illumina	PMDV	HG002_hiconf_HP	291396	3455775	299325	3535541	0.895132	0.9943	0.857506	0.972134	0.875915	0.983092
GM18856	NYGC_Illumina	PMDV	HG002_hiconf_HP	293235	3468442	299445	3544716	0.890163	0.993866	0.858104	0.972737	0.87384	0.983188
GM18861	NYGC_Illumina	PMDV	HG002_hiconf_HP	294050	3480895	302943	3554473	0.899718	0.993605	0.85931	0.973307	0.87905	0.983351
GM18864	NYGC_Illumina	PMDV	HG002_hiconf_HP	292376	3462502	300804	3547988	0.897782	0.994039	0.858499	0.970335	0.877701	0.982044
GM18865	NYGC_Illumina	PMDV	HG002_hiconf_HP	292727	3450027	300708	3536876	0.896166	0.994706	0.858098	0.970533	0.876719	0.982471
GM18871	NYGC_Illumina	PMDV	HG002_hiconf_HP	293620	3466852	300637	3545156	0.896325	0.994105	0.861441	0.972386	0.878537	0.983126
GM18876	NYGC_Illumina	PMDV	HG002_hiconf_HP	292625	3455622	301016	3533131	0.898136	0.994204	0.858811	0.972674	0.878034	0.983321
GM18924	NYGC_Illumina	PMDV	HG002_hiconf_HP	291536	3453857	297851	3532734	0.889506	0.994167	0.857368	0.97222	0.873141	0.983071
GM19035	NYGC_Illumina	PMDV	HG002_hiconf_HP	291289	3446817	298012	3540525	0.883748	0.9937	0.850788	0.967639	0.866955	0.980496
GM19041	NYGC_Illumina	PMDV	HG002_hiconf_HP	289937	3446369	300683	3547507	0.89566	0.994195	0.850437	0.966096	0.872463	0.979945
GM19308	NYGC_Illumina	PMDV	HG002_hiconf_HP	292211	3462857	301515	3561236	0.894532	0.994692	0.853016	0.967469	0.873281	0.980892
GM19312	NYGC_Illumina	PMDV	HG002_hiconf_HP	290133	3447960	299808	3538064	0.894845	0.993905	0.852536	0.968852	0.873178	0.981219
GM19462	NYGC_Illumina	PMDV	HG002_hiconf_HP	292317	3460375	300978	3549549	0.888624	0.99079	0.849856	0.966144	0.868808	0.978311
GM19471	NYGC_Illumina	PMDV	HG002_hiconf_HP	291535	3454966	302254	3553722	0.896342	0.994294	0.850659	0.966927	0.872903	0.98042
GM19473	NYGC_Illumina	PMDV	HG002_hiconf_HP	291056	3452829	302656	3559855	0.898696	0.994874	0.85056	0.965226	0.873966	0.979826
HG00105	NYGC_Illumina	PMDV	HG002_hiconf_HP	233665	2807281	245330	2880521	0.920853	0.996435	0.864843	0.971302	0.89197	0.983708
HG00110	NYGC_Illumina	PMDV	HG002_hiconf_HP	231296	2778235	240314	2848357	0.904685	0.99584	0.859754	0.971503	0.881648	0.983521
HG00121	NYGC_Illumina	PMDV	HG002_hiconf_HP	232027	2787563	240514	2857338	0.901162	0.995737	0.85832	0.971604	0.87922	0.983522
HG00127	NYGC_Illumina	PMDV	HG002_hiconf_HP	232939	2790795	239871	2859450	0.890199	0.994588	0.853842	0.970893	0.871642	0.982598
HG00136	NYGC_Illumina	PMDV	HG002_hiconf_HP	233511	2804904	243978	2877288	0.913533	0.996159	0.862762	0.971282	0.887422	0.983563
HG00151	NYGC_Illumina	PMDV	HG002_hiconf_HP	233622	2797732	243814	2870191	0.914824	0.996249	0.864446	0.971259	0.888922	0.983595
HG00331	NYGC_Illumina	PMDV	HG002_hiconf_HP	234535	2810057	244131	2878564	0.908862	0.995756	0.861267	0.972242	0.884425	0.983858
HG00410	NYGC_Illumina	PMDV	HG002_hiconf_HP	236205	2820563	246156	2906346	0.905709	0.995761	0.856847	0.966597	0.880601	0.980962
HG00473	NYGC_Illumina	PMDV	HG002_hiconf_HP	237244	2833988	247605	2905610	0.913376	0.995195	0.862418	0.970888	0.887166	0.982891
HG00525	NYGC_Illumina	PMDV	HG002_hiconf_HP	234263	2800056	244211	2876136	0.905691	0.995691	0.857066	0.96956	0.880708	0.982452
HG00599	NYGC_Illumina	PMDV	HG002_hiconf_HP	236341	2809330	246571	2894881	0.907985	0.995568	0.857996	0.966346	0.882283	0.980739
HG00631	NYGC_Illumina	PMDV	HG002_hiconf_HP	235313	2807826	243599	2889948	0.894596	0.995135	0.85284	0.967054	0.873219	0.980894
HG00675	NYGC_Illumina	PMDV	HG002_hiconf_HP	236694	2824604	245129	2903869	0.895477	0.994517	0.853453	0.967573	0.87396	0.98086
HG00705	NYGC_Illumina	PMDV	HG002_hiconf_HP	234822	2803650	244867	2877464	0.909387	0.995664	0.859671	0.970326	0.88383	0.982832
HG00706	NYGC_Illumina	PMDV	HG002_hiconf_HP	235741	2824160	245243	2888539	0.906088	0.99614	0.859136	0.974143	0.881987	0.985019
HG00728	NYGC_Illumina	PMDV	HG002_hiconf_HP	235841	2803539	243069	2884040	0.888268	0.994587	0.850335	0.967016	0.868887	0.980608
HG01046	NYGC_Illumina	PMDV	HG002_hiconf_HP	234441	2799772	244899	2878479	0.911014	0.995908	0.860249	0.968864	0.884904	0.9822
HG01122	NYGC_Illumina	PMDV	HG002_hiconf_HP	242105	2891589	249315	2969309	0.893435	0.994552	0.856479	0.968693	0.874566	0.981452
HG01281	NYGC_Illumina	PMDV	HG002_hiconf_HP	239379	2873770	247139	2946710	0.895312	0.99503	0.856134	0.970593	0.875285	0.982659
HG01312	NYGC_Illumina	PMDV	HG002_hiconf_HP	246230	2945114	255422	3017441	0.905958	0.995512	0.861312	0.971832	0.883071	0.98353
HG01363	NYGC_Illumina	PMDV	HG002_hiconf_HP	250547	2993226	260370	3071048	0.90872	0.995548	0.862346	0.970508	0.884926	0.982869
HG01369	NYGC_Illumina	PMDV	HG002_hiconf_HP	244770	2919223	254608	2998020	0.909781	0.995944	0.862443	0.969952	0.88548	0.982776
HG01372	NYGC_Illumina	PMDV	HG002_hiconf_HP	239410	2873499	248190	2947127	0.902176	0.995705	0.859152	0.971015	0.880139	0.983205
HG01395	NYGC_Illumina	PMDV	HG002_hiconf_HP	240566	2886042	251532	2957404	0.916085	0.996006	0.864315	0.972137	0.889448	0.983927
HG01414	NYGC_Illumina	PMDV	HG002_hiconf_HP	247130	2960287	256307	3035153	0.905151	0.995663	0.860714	0.971293	0.882373	0.983327
HG01468	NYGC_Illumina	PMDV	HG002_hiconf_HP	232426	2797453	239571	2862559	0.890907	0.993829	0.854014	0.971427	0.872071	0.9825
HG01501	NYGC_Illumina	PMDV	HG002_hiconf_HP	236405	2838888	242865	2899539	0.891398	0.993056	0.856739	0.972455	0.873725	0.982648
HG01615	NYGC_Illumina	PMDV	HG002_hiconf_HP	235444	2826687	245348	2895376	0.909821	0.995609	0.861605	0.972185	0.885057	0.983758
HG01695	NYGC_Illumina	PMDV	HG002_hiconf_HP	237635	2850983	246160	2920034	0.900684	0.995597	0.858324	0.972245	0.878994	0.983782
HG01790	NYGC_Illumina	PMDV	HG002_hiconf_HP	233481	2798719	244706	2873563	0.915766	0.996167	0.861814	0.970409	0.887971	0.98312
HG01797	NYGC_Illumina	PMDV	HG002_hiconf_HP	234976	2808787	243209	2882433	0.895436	0.993953	0.853805	0.968761	0.874125	0.981195
HG01801	NYGC_Illumina	PMDV	HG002_hiconf_HP	235824	2813977	244490	2889575	0.899179	0.99441	0.855565	0.968597	0.87683	0.981334
HG01812	NYGC_Illumina	PMDV	HG002_hiconf_HP	234798	2802026	241346	2876442	0.884726	0.994619	0.849776	0.969083	0.866899	0.981685
HG01862	NYGC_Illumina	PMDV	HG002_hiconf_HP	236390	2816825	247496	2900293	0.913753	0.996013	0.860014	0.967571	0.886069	0.981586
HG02048	NYGC_Illumina	PMDV	HG002_hiconf_HP	235787	2811828	246170	2889658	0.908604	0.995064	0.85859	0.96846	0.882889	0.981582
HG02051	NYGC_Illumina	PMDV	HG002_hiconf_HP	292180	3461049	298444	3546764	0.885742	0.99425	0.853567	0.97049	0.869357	0.982226
HG02102	NYGC_Illumina	PMDV	HG002_hiconf_HP	231331	2757482	240894	2837150	0.904881	0.995817	0.85751	0.968076	0.880559	0.981751
HG02185	NYGC_Illumina	PMDV	HG002_hiconf_HP	235025	2804911	244648	2883588	0.904904	0.995642	0.857178	0.968678	0.880395	0.981975
HG02252	NYGC_Illumina	PMDV	HG002_hiconf_HP	235423	2808395	244047	2892411	0.896816	0.995533	0.853864	0.966802	0.874813	0.980957
HG02262	NYGC_Illumina	PMDV	HG002_hiconf_HP	231795	2773725	242481	2852254	0.912634	0.995323	0.860542	0.968123	0.885823	0.981535
HG02282	NYGC_Illumina	PMDV	HG002_hiconf_HP	286000	3396441	290119	3471106	0.876909	0.99359	0.852461	0.97245	0.864512	0.982906
HG02312	NYGC_Illumina	PMDV	HG002_hiconf_HP	236789	2829385	246357	2909404	0.905536	0.995505	0.858989	0.968311	0.881649	0.981719
HG02345	NYGC_Illumina	PMDV	HG002_hiconf_HP	243771	2911901	254350	2996107	0.911995	0.995948	0.861565	0.968171	0.886063	0.981863
HG02373	NYGC_Illumina	PMDV	HG002_hiconf_HP	236647	2814915	246398	2897095	0.907888	0.995838	0.859175	0.967816	0.88286	0.981627
HG02389	NYGC_Illumina	PMDV	HG002_hiconf_HP	234553	2804938	246154	2885785	0.915614	0.996194	0.860075	0.968498	0.886976	0.982151
HG02396	NYGC_Illumina	PMDV	HG002_hiconf_HP	235502	2804782	246189	2882747	0.913232	0.995868	0.861111	0.969126	0.886406	0.982315
HG02409	NYGC_Illumina	PMDV	HG002_hiconf_HP	235319	2816643	246285	2897144	0.914274	0.995558	0.860783	0.968109	0.886723	0.981642
HG02502	NYGC_Illumina	PMDV	HG002_hiconf_HP	285901	3392408	291544	3477611	0.881109	0.994099	0.851432	0.969976	0.866017	0.981889
HG02614	NYGC_Illumina	PMDV	HG002_hiconf_HP	290373	3443924	297989	3525222	0.888199	0.993546	0.852082	0.970902	0.869766	0.982094
HG02615	NYGC_Illumina	PMDV	HG002_hiconf_HP	289548	3445741	296806	3514900	0.891089	0.994187	0.855633	0.974896	0.873001	0.984447
HG02694	NYGC_Illumina	PMDV	HG002_hiconf_HP	232802	2788704	242518	2862266	0.907694	0.995854	0.860002	0.970465	0.883205	0.982996
HG02731	NYGC_Illumina	PMDV	HG002_hiconf_HP	242700	2894165	251904	2973765	0.905826	0.995759	0.860252	0.969317	0.882451	0.98236
HG02817	NYGC_Illumina	PMDV	HG002_hiconf_HP	290057	3447370	295984	3526884	0.881196	0.993811	0.850779	0.971665	0.86572	0.982613
HG02974	NYGC_Illumina	PMDV	HG002_hiconf_HP	291144	3458230	297591	3536649	0.886922	0.99393	0.854233	0.972152	0.870271	0.98292
HG02979	NYGC_Illumina	PMDV	HG002_hiconf_HP	292427	3454745	300606	3534738	0.893519	0.994579	0.855272	0.972335	0.873977	0.983331
HG03022	NYGC_Illumina	PMDV	HG002_hiconf_HP	234364	2800973	243648	2877019	0.905527	0.995793	0.859609	0.96968	0.881971	0.982563
HG03069	NYGC_Illumina	PMDV	HG002_hiconf_HP	296129	3498676	303055	3587414	0.886742	0.993898	0.852509	0.969597	0.869288	0.981597
HG03120	NYGC_Illumina	PMDV	HG002_hiconf_HP	293907	3470821	299399	3544523	0.886066	0.993399	0.856159	0.973005	0.870856	0.983096
HG03121	NYGC_Illumina	PMDV	HG002_hiconf_HP	291896	3458709	299409	3535076	0.894158	0.99402	0.85788	0.972809	0.875643	0.9833
HG03168	NYGC_Illumina	PMDV	HG002_hiconf_HP	290976	3447668	297947	3526036	0.890225	0.994385	0.855887	0.972532	0.872718	0.983337
HG03279	NYGC_Illumina	PMDV	HG002_hiconf_HP	292592	3456736	297798	3539847	0.8808	0.993847	0.852276	0.970766	0.866303	0.982171
HG03499	NYGC_Illumina	PMDV	HG002_hiconf_HP	293290	3455853	299816	3537406	0.887991	0.993691	0.855165	0.971049	0.871269	0.982239
HG03548	NYGC_Illumina	PMDV	HG002_hiconf_HP	295295	3500841	300901	3588810	0.878816	0.993808	0.849289	0.969713	0.8638	0.981613
HG03563	NYGC_Illumina	PMDV	HG002_hiconf_HP	293262	3479218	302904	3572140	0.895268	0.994586	0.852623	0.968963	0.873425	0.981608
HG03571	NYGC_Illumina	PMDV	HG002_hiconf_HP	293909	3479376	300444	3568509	0.882382	0.993742	0.849915	0.969166	0.865844	0.9813
HG03631	NYGC_Illumina	PMDV	HG002_hiconf_HP	240084	2876146	249267	2955538	0.90545	0.99427	0.860218	0.967719	0.882255	0.980815
HG03643	NYGC_Illumina	PMDV	HG002_hiconf_HP	239751	2869013	247892	2946352	0.895679	0.995101	0.854965	0.969166	0.874849	0.981962
HG03646	NYGC_Illumina	PMDV	HG002_hiconf_HP	240748	2873427	249921	2956061	0.898292	0.995595	0.853574	0.967952	0.875362	0.981579
HG03668	NYGC_Illumina	PMDV	HG002_hiconf_HP	241441	2894356	248881	2965949	0.895883	0.995069	0.857374	0.971252	0.876206	0.983016
HG03717	NYGC_Illumina	PMDV	HG002_hiconf_HP	240273	2871372	248100	2944774	0.894433	0.995089	0.854857	0.970486	0.874197	0.982634
HG03731	NYGC_Illumina	PMDV	HG002_hiconf_HP	240671	2875728	251260	2954586	0.909162	0.995245	0.859058	0.968884	0.8834	0.981887
HG03744	NYGC_Illumina	PMDV	HG002_hiconf_HP	241821	2893997	251122	2978439	0.901415	0.995049	0.85648	0.96702	0.878373	0.980834
HG03770	NYGC_Illumina	PMDV	HG002_hiconf_HP	239318	2859315	248479	2942901	0.89984	0.995243	0.855171	0.967172	0.876937	0.981007
HG03774	NYGC_Illumina	PMDV	HG002_hiconf_HP	240249	2871402	250097	2949640	0.90822	0.995993	0.860378	0.969781	0.883652	0.982712
HG03814	NYGC_Illumina	PMDV	HG002_hiconf_HP	240221	2871464	248843	2943671	0.900621	0.994905	0.857207	0.970721	0.878378	0.982665
HG03861	NYGC_Illumina	PMDV	HG002_hiconf_HP	239244	2861084	249623	2934709	0.911513	0.99624	0.861299	0.971446	0.885695	0.983687
HG03864	NYGC_Illumina	PMDV	HG002_hiconf_HP	240087	2865461	248110	2943608	0.897037	0.995257	0.856467	0.969027	0.876283	0.981967
HG03868	NYGC_Illumina	PMDV	HG002_hiconf_HP	239183	2862436	247422	2940379	0.899918	0.995358	0.857604	0.969175	0.878251	0.982092
HG03898	NYGC_Illumina	PMDV	HG002_hiconf_HP	237079	2839851	245984	2914377	0.900936	0.995455	0.856816	0.970189	0.878322	0.982659
HG03919	NYGC_Illumina	PMDV	HG002_hiconf_HP	242204	2883865	250379	2965905	0.898858	0.995581	0.857652	0.968255	0.877772	0.981728
HG03971	NYGC_Illumina	PMDV	HG002_hiconf_HP	242058	2897026	251402	2976131	0.904564	0.995127	0.858995	0.968865	0.881191	0.981821
HG04054	NYGC_Illumina	PMDV	HG002_hiconf_HP	240258	2871698	248905	2947586	0.901464	0.995487	0.858404	0.970061	0.879407	0.98261
HG04063	NYGC_Illumina	PMDV	HG002_hiconf_HP	240240	2869097	248937	2944200	0.899376	0.995402	0.856144	0.970206	0.877228	0.982642
HG04216	NYGC_Illumina	PMDV	HG002_hiconf_HP	240987	2878546	250190	2959196	0.901393	0.995184	0.855718	0.968256	0.877962	0.981535
GM18501	NYGC_Illumina	clair3	none	976683	4343755	740602	5050764	0.538688	0.978855	0.700453	0.842788	0.609011	0.905739
GM18519	NYGC_Illumina	clair3	none	965126	4327758	740222	5029285	0.538936	0.97997	0.692946	0.844239	0.606314	0.907055
GM18856	NYGC_Illumina	clair3	none	972875	4350318	722928	5045486	0.528011	0.975102	0.701082	0.841665	0.602362	0.903483
GM18861	NYGC_Illumina	clair3	none	973916	4352959	759489	5030312	0.55597	0.979106	0.703168	0.848219	0.620965	0.908975
GM18864	NYGC_Illumina	clair3	none	968841	4335166	750057	5008809	0.552109	0.977303	0.703424	0.846754	0.618648	0.907357
GM18865	NYGC_Illumina	clair3	none	968445	4317758	757628	5016470	0.554828	0.980809	0.699356	0.84514	0.618764	0.907934
GM18871	NYGC_Illumina	clair3	none	973915	4335799	754690	5039538	0.552876	0.979225	0.703893	0.843398	0.619311	0.90625
GM18876	NYGC_Illumina	clair3	none	967504	4322205	751582	5016424	0.550702	0.979212	0.699244	0.844635	0.616146	0.906958
GM18924	NYGC_Illumina	clair3	none	968941	4326159	713441	4948490	0.522726	0.973124	0.700452	0.851618	0.598677	0.908325
GM19035	NYGC_Illumina	clair3	none	971113	4318185	709271	4987113	0.512208	0.976673	0.691753	0.846586	0.588593	0.906988
GM19041	NYGC_Illumina	clair3	none	961617	4316876	743452	5041670	0.539939	0.979784	0.689041	0.839888	0.605446	0.904459
GM19308	NYGC_Illumina	clair3	none	975199	4338900	741503	5027836	0.53217	0.978618	0.690299	0.845466	0.601008	0.907182
GM19312	NYGC_Illumina	clair3	none	964913	4316561	738537	4989273	0.542807	0.978204	0.699576	0.84724	0.611301	0.908024
GM19462	NYGC_Illumina	clair3	none	968189	4327560	735438	5024708	0.536224	0.976397	0.69628	0.841881	0.605859	0.904163
GM19471	NYGC_Illumina	clair3	none	968283	4326267	749629	5029538	0.542937	0.978823	0.691523	0.842941	0.608288	0.905814
GM19473	NYGC_Illumina	clair3	none	973342	4318858	754929	5017731	0.544552	0.978384	0.692661	0.843028	0.609741	0.905676
HG00105	NYGC_Illumina	clair3	none	776334	3519806	643845	4188577	0.576413	0.976769	0.686344	0.821741	0.626593	0.892573
HG00110	NYGC_Illumina	clair3	none	774437	3488458	595294	4110110	0.531764	0.979469	0.683286	0.832332	0.598077	0.899926
HG00121	NYGC_Illumina	clair3	none	774705	3495446	590962	4132948	0.533781	0.978409	0.690914	0.828443	0.602267	0.897203
HG00127	NYGC_Illumina	clair3	none	779074	3501406	581828	4119244	0.511171	0.977902	0.675976	0.832221	0.582134	0.899199
HG00136	NYGC_Illumina	clair3	none	781581	3515782	619060	4157356	0.549615	0.973804	0.685213	0.824464	0.609969	0.892933
HG00151	NYGC_Illumina	clair3	none	781480	3506854	623920	4171608	0.555359	0.977179	0.686742	0.82238	0.614102	0.893122
HG00331	NYGC_Illumina	clair3	none	782608	3521541	606191	4106441	0.536482	0.971499	0.684019	0.83403	0.601333	0.897531
HG00410	NYGC_Illumina	clair3	none	787157	3534500	619643	4216708	0.547646	0.981521	0.686636	0.823772	0.609315	0.895754
HG00473	NYGC_Illumina	clair3	none	789044	3552510	638291	4215791	0.56583	0.979042	0.69048	0.825978	0.621971	0.89602
HG00525	NYGC_Illumina	clair3	none	778291	3509274	608736	4158838	0.542956	0.978577	0.685359	0.826716	0.605903	0.896259
HG00599	NYGC_Illumina	clair3	none	787650	3518337	618769	4174608	0.552626	0.976826	0.694201	0.824216	0.615376	0.894056
HG00631	NYGC_Illumina	clair3	none	782950	3517887	593881	4149364	0.528423	0.977256	0.687707	0.82953	0.597634	0.897354
HG00675	NYGC_Illumina	clair3	none	788183	3539011	599069	4152044	0.531571	0.975495	0.690386	0.832443	0.600658	0.898309
HG00705	NYGC_Illumina	clair3	none	783071	3518473	619032	4155728	0.549485	0.978605	0.686039	0.829547	0.610216	0.897932
HG00706	NYGC_Illumina	clair3	none	780710	3533257	605643	4170791	0.542082	0.980148	0.68969	0.831301	0.607042	0.899609
HG00728	NYGC_Illumina	clair3	none	786223	3513925	590452	4189662	0.51367	0.978049	0.6753	0.821219	0.583499	0.892799
HG01046	NYGC_Illumina	clair3	none	781196	3505848	626114	4174573	0.563686	0.980627	0.69446	0.824498	0.622276	0.895811
HG01122	NYGC_Illumina	clair3	none	811778	3625084	602168	4269942	0.514869	0.975493	0.68543	0.829082	0.588031	0.896348
HG01281	NYGC_Illumina	clair3	none	798825	3600766	601371	4318851	0.5237	0.97968	0.686929	0.817726	0.594311	0.891406
HG01312	NYGC_Illumina	clair3	none	819897	3689264	634938	4327546	0.542973	0.979839	0.69203	0.836294	0.608506	0.902393
HG01363	NYGC_Illumina	clair3	none	835538	3750370	655452	4394268	0.547543	0.979424	0.688889	0.836866	0.610137	0.90255
HG01369	NYGC_Illumina	clair3	none	815268	3654110	641511	4322435	0.547031	0.979973	0.686297	0.829394	0.608801	0.898418
HG01372	NYGC_Illumina	clair3	none	798994	3601445	610159	4248431	0.534453	0.979275	0.691271	0.831098	0.60283	0.899123
HG01395	NYGC_Illumina	clair3	none	804347	3616123	653167	4309491	0.571649	0.979754	0.695009	0.823058	0.627322	0.894596
HG01414	NYGC_Illumina	clair3	none	825335	3711415	632079	4330060	0.533147	0.977113	0.687216	0.838447	0.600456	0.902485
HG01468	NYGC_Illumina	clair3	none	777361	3505096	578031	4139827	0.510686	0.979521	0.678246	0.830328	0.582658	0.898775
HG01501	NYGC_Illumina	clair3	none	789166	3561646	588355	4139401	0.516841	0.974846	0.684609	0.839701	0.589011	0.90224
HG01615	NYGC_Illumina	clair3	none	788926	3540660	615651	4184813	0.546333	0.973942	0.691509	0.82493	0.610407	0.893264
HG01695	NYGC_Illumina	clair3	none	796107	3577833	599070	4193245	0.526093	0.974608	0.690403	0.832467	0.597151	0.897947
HG01790	NYGC_Illumina	clair3	none	780364	3510679	626104	4199742	0.559556	0.982785	0.688544	0.822517	0.617384	0.895537
HG01797	NYGC_Illumina	clair3	none	782377	3516532	600030	4153653	0.527509	0.979142	0.679068	0.829966	0.59377	0.898403
HG01801	NYGC_Illumina	clair3	none	784614	3524007	608506	4158843	0.528307	0.98059	0.672504	0.831907	0.591748	0.90015
HG01812	NYGC_Illumina	clair3	none	781103	3511282	581117	4146903	0.513475	0.980063	0.681429	0.830839	0.585648	0.899303
HG01862	NYGC_Illumina	clair3	none	786506	3528881	641004	4190420	0.562672	0.980687	0.681306	0.826862	0.616332	0.897229
HG02048	NYGC_Illumina	clair3	none	785492	3528386	621924	4189962	0.556999	0.975165	0.694702	0.822128	0.618276	0.892131
HG02051	NYGC_Illumina	clair3	none	968861	4332661	704519	4979675	0.507577	0.976301	0.688508	0.85036	0.584358	0.908989
HG02102	NYGC_Illumina	clair3	none	768641	3452686	600972	4091072	0.544984	0.978975	0.68831	0.827216	0.608319	0.89672
HG02185	NYGC_Illumina	clair3	none	782555	3511234	609684	4156563	0.541464	0.975832	0.686132	0.825298	0.605274	0.894275
HG02252	NYGC_Illumina	clair3	none	785390	3514902	597531	4167732	0.5313	0.976734	0.689521	0.824657	0.600158	0.894276
HG02262	NYGC_Illumina	clair3	none	772485	3475145	621579	4132502	0.566916	0.980152	0.695886	0.825197	0.624815	0.896024
HG02282	NYGC_Illumina	clair3	none	948070	4249230	675391	4908447	0.497384	0.977946	0.689032	0.847575	0.577729	0.908105
HG02312	NYGC_Illumina	clair3	none	788032	3544070	614332	4225313	0.54495	0.982744	0.690042	0.825315	0.608973	0.897176
HG02345	NYGC_Illumina	clair3	none	811389	3646486	646817	4384101	0.554814	0.982347	0.686816	0.818008	0.613798	0.892677
HG02373	NYGC_Illumina	clair3	none	791825	3525199	624971	4191775	0.552159	0.978777	0.69037	0.824116	0.613577	0.894813
HG02389	NYGC_Illumina	clair3	none	780227	3513438	646337	4213269	0.588285	0.981356	0.700978	0.819339	0.639706	0.893059
HG02396	NYGC_Illumina	clair3	none	786781	3513177	637447	4177397	0.560666	0.97743	0.683244	0.822977	0.615915	0.893578
HG02409	NYGC_Illumina	clair3	none	783532	3527165	641478	4240102	0.570792	0.980876	0.688039	0.816954	0.623956	0.891442
HG02502	NYGC_Illumina	clair3	none	947883	4247882	687247	4922682	0.506071	0.978948	0.688643	0.845709	0.583407	0.907464
HG02614	NYGC_Illumina	clair3	none	963123	4310191	710341	5000692	0.517182	0.977582	0.691483	0.843562	0.591765	0.90564
HG02615	NYGC_Illumina	clair3	none	953889	4300776	703990	4941528	0.518669	0.979819	0.693132	0.853754	0.593342	0.912453
HG02694	NYGC_Illumina	clair3	none	775817	3493631	604027	4131456	0.541722	0.979377	0.687011	0.829156	0.605777	0.898027
HG02731	NYGC_Illumina	clair3	none	809085	3627894	627606	4289721	0.537246	0.980284	0.683357	0.830052	0.601557	0.898935
HG02817	NYGC_Illumina	clair3	none	963441	4317031	693209	4939892	0.504827	0.974586	0.692272	0.85262	0.583874	0.909533
HG02974	NYGC_Illumina	clair3	none	964995	4327173	705321	4969678	0.513148	0.977043	0.692425	0.851673	0.589457	0.910061
HG02979	NYGC_Illumina	clair3	none	969428	4327459	726807	4966249	0.528751	0.977192	0.695414	0.852476	0.600738	0.910584
HG03022	NYGC_Illumina	clair3	none	780501	3514718	603958	4197743	0.538311	0.981372	0.686957	0.822687	0.603617	0.895051
HG03069	NYGC_Illumina	clair3	none	985574	4381018	721839	5041289	0.51124	0.975554	0.688442	0.848709	0.586754	0.907722
HG03120	NYGC_Illumina	clair3	none	973487	4346764	710658	5013822	0.504006	0.973543	0.681081	0.844882	0.579314	0.904661
HG03121	NYGC_Illumina	clair3	none	970935	4328400	727893	4983071	0.529559	0.979159	0.696487	0.851502	0.601659	0.910879
HG03168	NYGC_Illumina	clair3	none	964492	4314201	712248	4991204	0.521104	0.9779	0.696006	0.846206	0.595988	0.907299
HG03279	NYGC_Illumina	clair3	none	969063	4333351	698032	4977521	0.502876	0.974934	0.688731	0.849717	0.58131	0.908029
HG03499	NYGC_Illumina	clair3	none	972158	4322943	715178	4951806	0.514973	0.974268	0.690425	0.851462	0.58993	0.908735
HG03548	NYGC_Illumina	clair3	none	978686	4385734	698550	5027208	0.497035	0.973303	0.686894	0.850029	0.576741	0.907499
HG03563	NYGC_Illumina	clair3	none	971090	4356177	742378	5051124	0.535974	0.97852	0.691311	0.844817	0.603812	0.906766
HG03571	NYGC_Illumina	clair3	none	975026	4357183	706524	4967844	0.503632	0.972506	0.685776	0.853833	0.580757	0.909314
HG03631	NYGC_Illumina	clair3	none	800514	3603522	629397	4261963	0.548506	0.974931	0.688713	0.825189	0.610665	0.893832
HG03643	NYGC_Illumina	clair3	none	801925	3593907	605612	4260930	0.524317	0.981247	0.685244	0.828618	0.594075	0.898497
HG03646	NYGC_Illumina	clair3	none	801557	3595798	610682	4272633	0.528745	0.978807	0.684915	0.82472	0.596782	0.895181
HG03668	NYGC_Illumina	clair3	none	804243	3628711	605938	4285705	0.522572	0.980274	0.68456	0.83097	0.592697	0.899469
HG03717	NYGC_Illumina	clair3	none	800772	3596478	606934	4240191	0.520601	0.977735	0.67837	0.830229	0.589106	0.897965
HG03731	NYGC_Illumina	clair3	none	800071	3603496	634064	4277081	0.556242	0.975636	0.692728	0.822942	0.617027	0.892807
HG03744	NYGC_Illumina	clair3	none	808244	3627910	620539	4287649	0.535591	0.980492	0.688674	0.830592	0.602561	0.899339
HG03770	NYGC_Illumina	clair3	none	797983	3585470	613470	4216945	0.530718	0.979046	0.681614	0.833442	0.596775	0.900396
HG03774	NYGC_Illumina	clair3	none	802849	3600624	628449	4284248	0.549002	0.978479	0.692212	0.823285	0.612346	0.894199
HG03814	NYGC_Illumina	clair3	none	800232	3599147	609222	4195189	0.525371	0.971578	0.681252	0.834478	0.593243	0.897824
HG03861	NYGC_Illumina	clair3	none	797047	3584055	634388	4205322	0.559621	0.976822	0.694118	0.833445	0.619655	0.899456
HG03864	NYGC_Illumina	clair3	none	801824	3596368	604115	4264581	0.524238	0.978093	0.686942	0.825804	0.594662	0.89552
HG03868	NYGC_Illumina	clair3	none	800512	3595538	609729	4230392	0.524733	0.973719	0.680114	0.828526	0.592404	0.895274
HG03898	NYGC_Illumina	clair3	none	792871	3561011	606345	4193540	0.530948	0.976695	0.685656	0.830325	0.598465	0.897582
HG03919	NYGC_Illumina	clair3	none	807637	3613384	612786	4240021	0.524024	0.972624	0.681612	0.829821	0.592519	0.895565
HG03971	NYGC_Illumina	clair3	none	806691	3630321	623995	4303442	0.538806	0.977588	0.687496	0.825632	0.604137	0.895207
HG04054	NYGC_Illumina	clair3	none	801517	3595142	611248	4202876	0.526286	0.977285	0.681259	0.836934	0.593828	0.901681
HG04063	NYGC_Illumina	clair3	none	799614	3593537	611708	4218487	0.526739	0.976902	0.679976	0.833116	0.593628	0.899298
HG04216	NYGC_Illumina	clair3	none	803938	3609457	622945	4280462	0.535998	0.978484	0.682842	0.826083	0.600574	0.895848
GM18501	NYGC_Illumina	PMDV	none	976683	4343755	770380	4800429	0.575116	0.978481	0.717207	0.885898	0.63835	0.929891
GM18519	NYGC_Illumina	PMDV	none	965126	4327758	767609	4791812	0.575044	0.979322	0.711206	0.884999	0.635918	0.929774
GM18856	NYGC_Illumina	PMDV	none	972875	4350318	760477	4824641	0.564618	0.977552	0.711289	0.881941	0.629523	0.927288
GM18861	NYGC_Illumina	PMDV	none	973916	4352959	803000	4820577	0.594115	0.978893	0.709213	0.88444	0.646582	0.929272
GM18864	NYGC_Illumina	PMDV	none	968841	4335166	785033	4810599	0.589963	0.979007	0.716668	0.882747	0.647172	0.928389
GM18865	NYGC_Illumina	PMDV	none	968445	4317758	785876	4790048	0.5921	0.979822	0.717781	0.883694	0.648911	0.929279
GM18871	NYGC_Illumina	PMDV	none	973915	4335799	786618	4802701	0.591379	0.979406	0.720608	0.884679	0.649629	0.929636
GM18876	NYGC_Illumina	PMDV	none	967504	4322205	787982	4800791	0.589244	0.979722	0.71201	0.882574	0.644836	0.928614
GM18924	NYGC_Illumina	PMDV	none	968941	4326159	758388	4760080	0.557072	0.978943	0.70129	0.89021	0.620917	0.93247
GM19035	NYGC_Illumina	PMDV	none	971113	4318185	740845	4770599	0.545276	0.978052	0.703889	0.885782	0.614513	0.929633
GM19041	NYGC_Illumina	PMDV	none	961617	4316876	771834	4805526	0.575657	0.979122	0.705937	0.880052	0.634175	0.926947
GM19308	NYGC_Illumina	PMDV	none	975199	4338900	767885	4811999	0.568587	0.979463	0.710358	0.883677	0.631614	0.929108
GM19312	NYGC_Illumina	PMDV	none	964913	4316561	778239	4782093	0.580397	0.978767	0.708231	0.883991	0.637974	0.928968
GM19462	NYGC_Illumina	PMDV	none	968189	4327560	782810	4798013	0.569898	0.975917	0.694225	0.880738	0.625948	0.925887
GM19471	NYGC_Illumina	PMDV	none	968283	4326267	781885	4790990	0.580285	0.978908	0.706851	0.884491	0.637345	0.929308
GM19473	NYGC_Illumina	PMDV	none	973342	4318858	792709	4830550	0.5841	0.980241	0.705885	0.876917	0.639244	0.925705
HG00105	NYGC_Illumina	PMDV	none	776334	3519806	661459	4020843	0.618619	0.982733	0.715825	0.860817	0.663682	0.917743
HG00110	NYGC_Illumina	PMDV	none	774437	3488458	611648	3906003	0.563615	0.981408	0.704078	0.87703	0.626065	0.926288
HG00121	NYGC_Illumina	PMDV	none	774705	3495446	623992	3902398	0.56227	0.981526	0.689172	0.879698	0.619287	0.927826
HG00127	NYGC_Illumina	PMDV	none	779074	3501406	587933	3874349	0.534755	0.979719	0.699088	0.885962	0.605978	0.930485
HG00136	NYGC_Illumina	PMDV	none	781581	3515782	634647	3970406	0.586776	0.981717	0.712648	0.869833	0.643616	0.922394
HG00151	NYGC_Illumina	PMDV	none	781480	3506854	641351	3971027	0.592983	0.982031	0.712351	0.86775	0.647209	0.92136
HG00331	NYGC_Illumina	PMDV	none	782608	3521541	623348	3950403	0.573489	0.981817	0.710067	0.875782	0.634512	0.925773
HG00410	NYGC_Illumina	PMDV	none	787157	3534500	640037	3985405	0.580368	0.982071	0.7037	0.871533	0.636111	0.923506
HG00473	NYGC_Illumina	PMDV	none	789044	3552510	658728	4017473	0.605027	0.981551	0.714454	0.868502	0.655203	0.921572
HG00525	NYGC_Illumina	PMDV	none	778291	3509274	624573	3959381	0.576378	0.981794	0.708409	0.870741	0.635609	0.922939
HG00599	NYGC_Illumina	PMDV	none	787650	3518337	654337	3999299	0.588902	0.981788	0.699202	0.864264	0.63933	0.919285
HG00631	NYGC_Illumina	PMDV	none	782950	3517887	618310	3947559	0.55831	0.98088	0.697663	0.874656	0.620256	0.924727
HG00675	NYGC_Illumina	PMDV	none	788183	3539011	627240	3962715	0.562706	0.980491	0.697824	0.87619	0.623023	0.925411
HG00705	NYGC_Illumina	PMDV	none	783071	3518473	638252	3936052	0.586081	0.981387	0.708795	0.877835	0.641623	0.926728
HG00706	NYGC_Illumina	PMDV	none	780710	3533257	628213	3972596	0.576233	0.983842	0.706348	0.875565	0.634691	0.926551
HG00728	NYGC_Illumina	PMDV	none	786223	3513925	595981	3945705	0.537437	0.979938	0.699247	0.873232	0.607756	0.923513
HG01046	NYGC_Illumina	PMDV	none	781196	3505848	653802	3972084	0.601165	0.982926	0.708736	0.868071	0.650534	0.921935
HG01122	NYGC_Illumina	PMDV	none	811778	3625084	619774	4056980	0.542619	0.979428	0.701315	0.875669	0.611844	0.924647
HG01281	NYGC_Illumina	PMDV	none	798825	3600766	626639	4085596	0.550842	0.98076	0.692922	0.864859	0.613767	0.91917
HG01312	NYGC_Illumina	PMDV	none	819897	3689264	665777	4106824	0.574406	0.981479	0.697465	0.882208	0.629982	0.929199
HG01363	NYGC_Illumina	PMDV	none	835538	3750370	680617	4180556	0.585763	0.981192	0.708758	0.880754	0.641417	0.928264
HG01369	NYGC_Illumina	PMDV	none	815268	3654110	660216	4129922	0.584127	0.98286	0.711081	0.870126	0.641382	0.923064
HG01372	NYGC_Illumina	PMDV	none	798994	3601445	648050	4044418	0.563974	0.981355	0.686364	0.874393	0.619179	0.924792
HG01395	NYGC_Illumina	PMDV	none	804347	3616123	676831	4090428	0.610904	0.982175	0.715908	0.868779	0.659251	0.922003
HG01414	NYGC_Illumina	PMDV	none	825335	3711415	652977	4142754	0.567484	0.981415	0.707177	0.879739	0.629675	0.9278
HG01468	NYGC_Illumina	PMDV	none	777361	3505096	602193	3908665	0.538613	0.979046	0.686584	0.878499	0.603663	0.926051
HG01501	NYGC_Illumina	PMDV	none	789166	3561646	604216	3941558	0.545321	0.977848	0.702651	0.884093	0.614069	0.92861
HG01615	NYGC_Illumina	PMDV	none	788926	3540660	644451	4007749	0.58515	0.981904	0.706887	0.867989	0.640283	0.921439
HG01695	NYGC_Illumina	PMDV	none	796107	3577833	630698	3993246	0.557868	0.981352	0.695014	0.879782	0.618935	0.927796
HG01790	NYGC_Illumina	PMDV	none	780364	3510679	650146	3968095	0.594657	0.982398	0.703616	0.869695	0.644564	0.922617
HG01797	NYGC_Illumina	PMDV	none	782377	3516532	611511	3922020	0.555871	0.979632	0.70135	0.8789	0.620194	0.926536
HG01801	NYGC_Illumina	PMDV	none	784614	3524007	612714	3929946	0.554865	0.980768	0.700322	0.880007	0.619165	0.927659
HG01812	NYGC_Illumina	PMDV	none	781103	3511282	604498	3920866	0.538901	0.980227	0.687251	0.87836	0.604102	0.926502
HG01862	NYGC_Illumina	PMDV	none	786506	3528881	656921	3982702	0.602737	0.982257	0.710906	0.870891	0.652368	0.923228
HG02048	NYGC_Illumina	PMDV	none	785492	3528386	651465	3991269	0.594692	0.981032	0.707418	0.867795	0.646176	0.920946
HG02051	NYGC_Illumina	PMDV	none	968861	4332661	727668	4767199	0.538387	0.978925	0.705554	0.890216	0.610738	0.932465
HG02102	NYGC_Illumina	PMDV	none	768641	3452686	624607	3893627	0.576845	0.982276	0.70065	0.871599	0.632749	0.923634
HG02185	NYGC_Illumina	PMDV	none	782555	3511234	625099	3977070	0.576393	0.982569	0.711618	0.86802	0.636907	0.921749
HG02252	NYGC_Illumina	PMDV	none	785390	3514902	632572	3971924	0.559787	0.981315	0.686192	0.868905	0.616578	0.921696
HG02262	NYGC_Illumina	PMDV	none	772485	3475145	651614	3927698	0.605387	0.982229	0.708225	0.869599	0.65278	0.922489
HG02282	NYGC_Illumina	PMDV	none	948070	4249230	701510	4661377	0.522802	0.978105	0.696358	0.892124	0.597227	0.933138
HG02312	NYGC_Illumina	PMDV	none	788032	3544070	648303	3980498	0.572894	0.981853	0.686986	0.874736	0.624774	0.925204
HG02345	NYGC_Illumina	PMDV	none	811389	3646486	668816	4144870	0.590877	0.982424	0.706427	0.864816	0.643506	0.919876
HG02373	NYGC_Illumina	PMDV	none	791825	3525199	646928	3991254	0.588696	0.981941	0.71039	0.867833	0.643843	0.921367
HG02389	NYGC_Illumina	PMDV	none	780227	3513438	684083	3997105	0.623296	0.982838	0.701241	0.864452	0.659975	0.919852
HG02396	NYGC_Illumina	PMDV	none	786781	3513177	652979	3998810	0.601406	0.982668	0.714335	0.863861	0.653024	0.919443
HG02409	NYGC_Illumina	PMDV	none	783532	3527165	660517	4014016	0.608458	0.981713	0.711372	0.863173	0.655902	0.918635
HG02502	NYGC_Illumina	PMDV	none	947883	4247882	717026	4668464	0.532096	0.978502	0.692983	0.890862	0.601975	0.932628
HG02614	NYGC_Illumina	PMDV	none	963123	4310191	745313	4765304	0.545215	0.978188	0.69368	0.885311	0.610552	0.929435
HG02615	NYGC_Illumina	PMDV	none	953889	4300776	734763	4720667	0.547209	0.981331	0.699442	0.894582	0.614031	0.935951
HG02694	NYGC_Illumina	PMDV	none	775817	3493631	634135	3932231	0.581105	0.98144	0.701453	0.872515	0.635633	0.923778
HG02731	NYGC_Illumina	PMDV	none	809085	3627894	643871	4066832	0.5687	0.981398	0.704119	0.876026	0.629206	0.925723
HG02817	NYGC_Illumina	PMDV	none	963441	4317031	729672	4728499	0.534749	0.978422	0.695724	0.8938	0.604707	0.934199
HG02974	NYGC_Illumina	PMDV	none	964995	4327173	738898	4758251	0.543999	0.978756	0.69949	0.890613	0.612023	0.932606
HG02979	NYGC_Illumina	PMDV	none	969428	4327459	763919	4760204	0.565807	0.97929	0.706731	0.890786	0.628466	0.932943
HG03022	NYGC_Illumina	PMDV	none	780501	3514718	630305	3966867	0.573157	0.981293	0.70052	0.869969	0.630471	0.922284
HG03069	NYGC_Illumina	PMDV	none	985574	4381018	747617	4823637	0.544898	0.978121	0.706788	0.88889	0.615374	0.931373
HG03120	NYGC_Illumina	PMDV	none	973487	4346764	724478	4821279	0.533872	0.978391	0.706027	0.882597	0.607998	0.928029
HG03121	NYGC_Illumina	PMDV	none	970935	4328400	761959	4745301	0.564634	0.979105	0.707818	0.893629	0.62817	0.934416
HG03168	NYGC_Illumina	PMDV	none	964492	4314201	748967	4788853	0.552137	0.979686	0.700203	0.883094	0.617417	0.928885
HG03279	NYGC_Illumina	PMDV	none	969063	4333351	721905	4772822	0.531899	0.978021	0.703	0.888466	0.605596	0.931095
HG03499	NYGC_Illumina	PMDV	none	972158	4322943	741642	4758648	0.548724	0.979012	0.707962	0.889894	0.618254	0.932328
HG03548	NYGC_Illumina	PMDV	none	978686	4385734	722500	4828333	0.525097	0.977497	0.700475	0.888396	0.600238	0.930819
HG03563	NYGC_Illumina	PMDV	none	971090	4356177	771444	4832259	0.572567	0.979659	0.708877	0.883644	0.633472	0.929178
HG03571	NYGC_Illumina	PMDV	none	975026	4357183	729123	4790172	0.53594	0.978404	0.705615	0.890457	0.609183	0.932361
HG03631	NYGC_Illumina	PMDV	none	800514	3603522	653519	4054797	0.587464	0.980282	0.709669	0.871657	0.64281	0.922784
HG03643	NYGC_Illumina	PMDV	none	801925	3593907	630111	4022467	0.550803	0.981016	0.691492	0.877021	0.613181	0.926108
HG03646	NYGC_Illumina	PMDV	none	801557	3595798	636752	4053386	0.558515	0.981928	0.693377	0.871623	0.618682	0.923494
HG03668	NYGC_Illumina	PMDV	none	804243	3628711	623901	4044692	0.547795	0.980318	0.696288	0.880024	0.613179	0.927468
HG03717	NYGC_Illumina	PMDV	none	800772	3596478	617232	4020127	0.549971	0.980894	0.703769	0.878016	0.617437	0.926608
HG03731	NYGC_Illumina	PMDV	none	800071	3603496	668667	4093743	0.593569	0.980899	0.700456	0.863939	0.642598	0.918712
HG03744	NYGC_Illumina	PMDV	none	808244	3627910	651392	4090566	0.566771	0.980952	0.693664	0.87052	0.62383	0.922442
HG03770	NYGC_Illumina	PMDV	none	797983	3585470	632365	4018122	0.563142	0.981079	0.700984	0.87598	0.624548	0.925556
HG03774	NYGC_Illumina	PMDV	none	802849	3600624	663788	4074865	0.587553	0.98184	0.700829	0.868124	0.639211	0.921487
HG03814	NYGC_Illumina	PMDV	none	800232	3599147	620664	4026631	0.557952	0.980729	0.709223	0.877156	0.624558	0.926055
HG03861	NYGC_Illumina	PMDV	none	797047	3584055	666022	4023127	0.601019	0.982521	0.7094	0.875828	0.650727	0.926112
HG03864	NYGC_Illumina	PMDV	none	801824	3596368	628137	4038529	0.552363	0.98026	0.695632	0.873442	0.615774	0.923773
HG03868	NYGC_Illumina	PMDV	none	800512	3595538	622443	4028061	0.557518	0.979878	0.706725	0.875201	0.623317	0.924586
HG03898	NYGC_Illumina	PMDV	none	792871	3561011	628923	4000037	0.567063	0.980966	0.705242	0.873837	0.628649	0.924308
HG03919	NYGC_Illumina	PMDV	none	807637	3613384	624183	4050705	0.554619	0.981581	0.707352	0.87616	0.621743	0.925879
HG03971	NYGC_Illumina	PMDV	none	806691	3630321	647216	4085814	0.57377	0.981241	0.705154	0.872367	0.632713	0.923606
HG04054	NYGC_Illumina	PMDV	none	801517	3595142	623161	4015469	0.557416	0.981518	0.707047	0.879325	0.623378	0.927616
HG04063	NYGC_Illumina	PMDV	none	799614	3593537	624606	4016661	0.558436	0.981475	0.705099	0.878584	0.623255	0.927184
HG04216	NYGC_Illumina	PMDV	none	803938	3609457	637030	4054424	0.567683	0.980717	0.706088	0.873624	0.629366	0.924078
GM18501	NYGC_Illumina	clair3	HG002_hiconf	678264	4041959	537062	4138888	0.661088	0.990984	0.82505	0.968362	0.734024	0.979542
GM18519	NYGC_Illumina	clair3	HG002_hiconf	672548	4028218	536116	4129322	0.660589	0.99176	0.819131	0.968074	0.731367	0.979774
GM18856	NYGC_Illumina	clair3	HG002_hiconf	676145	4044619	526583	4128099	0.649213	0.988351	0.824296	0.968911	0.726352	0.978535
GM18861	NYGC_Illumina	clair3	HG002_hiconf	677542	4058292	549154	4148269	0.680634	0.99064	0.830029	0.969729	0.747944	0.980073
GM18864	NYGC_Illumina	clair3	HG002_hiconf	674454	4036829	544230	4131676	0.67577	0.989321	0.827928	0.967125	0.744151	0.978097
GM18865	NYGC_Illumina	clair3	HG002_hiconf	673255	4021982	549533	4129959	0.67975	0.99245	0.823055	0.967067	0.74457	0.979594
GM18871	NYGC_Illumina	clair3	HG002_hiconf	675660	4042365	547683	4134157	0.678986	0.990704	0.828154	0.96926	0.746188	0.979865
GM18876	NYGC_Illumina	clair3	HG002_hiconf	673201	4028563	544134	4119168	0.674427	0.990632	0.824823	0.969411	0.742081	0.979907
GM18924	NYGC_Illumina	clair3	HG002_hiconf	672867	4027415	518139	4097842	0.643051	0.985258	0.82573	0.968844	0.72303	0.976982
GM19035	NYGC_Illumina	clair3	HG002_hiconf	673196	4019081	515990	4125201	0.631014	0.988589	0.814022	0.963685	0.710929	0.975978
GM19041	NYGC_Illumina	clair3	HG002_hiconf	670211	4018140	537688	4143609	0.660316	0.991463	0.813965	0.962016	0.729134	0.976518
GM19308	NYGC_Illumina	clair3	HG002_hiconf	675150	4036869	537112	4151341	0.654357	0.990578	0.813087	0.96383	0.725137	0.977021
GM19312	NYGC_Illumina	clair3	HG002_hiconf	670500	4020715	536429	4125939	0.665911	0.990164	0.822936	0.965455	0.736143	0.977653
GM19462	NYGC_Illumina	clair3	HG002_hiconf	673304	4034057	532852	4144216	0.658551	0.988007	0.822622	0.962317	0.731499	0.974993
GM19471	NYGC_Illumina	clair3	HG002_hiconf	672885	4028759	540909	4148235	0.664586	0.990902	0.817038	0.962958	0.732969	0.97673
GM19473	NYGC_Illumina	clair3	HG002_hiconf	675747	4025869	545036	4145091	0.667075	0.989854	0.817713	0.961912	0.734753	0.975683
HG00105	NYGC_Illumina	clair3	HG002_hiconf	535280	3271220	451331	3336191	0.697379	0.987894	0.819226	0.969048	0.753408	0.97838
HG00110	NYGC_Illumina	clair3	HG002_hiconf	530424	3238038	417610	3315432	0.649439	0.990519	0.817447	0.96784	0.723822	0.979048
HG00121	NYGC_Illumina	clair3	HG002_hiconf	531896	3248620	415327	3321504	0.652022	0.989327	0.827062	0.968039	0.729185	0.978567
HG00127	NYGC_Illumina	clair3	HG002_hiconf	533905	3252203	408897	3330187	0.62477	0.988975	0.808372	0.966258	0.704811	0.977485
HG00136	NYGC_Illumina	clair3	HG002_hiconf	536013	3268076	435340	3325855	0.669154	0.985214	0.816208	0.968482	0.735401	0.976777
HG00151	NYGC_Illumina	clair3	HG002_hiconf	535827	3260142	438435	3327977	0.676877	0.988237	0.81915	0.968479	0.741248	0.978259
HG00331	NYGC_Illumina	clair3	HG002_hiconf	537296	3274030	427962	3319362	0.653573	0.982409	0.812796	0.969385	0.72454	0.975854
HG00410	NYGC_Illumina	clair3	HG002_hiconf	542793	3286788	436078	3387088	0.666099	0.991754	0.82075	0.962908	0.735382	0.977118
HG00473	NYGC_Illumina	clair3	HG002_hiconf	544238	3302123	449536	3379495	0.686459	0.989654	0.82267	0.967474	0.748418	0.978439
HG00525	NYGC_Illumina	clair3	HG002_hiconf	537976	3262931	430188	3342415	0.659589	0.989131	0.81682	0.966069	0.729832	0.977464
HG00599	NYGC_Illumina	clair3	HG002_hiconf	543318	3273843	437239	3358374	0.672164	0.987632	0.826676	0.963215	0.741456	0.97527
HG00631	NYGC_Illumina	clair3	HG002_hiconf	540087	3271899	420522	3357829	0.644028	0.987974	0.819061	0.963172	0.721074	0.975415
HG00675	NYGC_Illumina	clair3	HG002_hiconf	544858	3292069	425199	3371092	0.647222	0.986282	0.821136	0.963637	0.723879	0.974828
HG00705	NYGC_Illumina	clair3	HG002_hiconf	539381	3267597	436181	3348183	0.667819	0.989773	0.817638	0.966427	0.735173	0.97796
HG00706	NYGC_Illumina	clair3	HG002_hiconf	541101	3291379	428946	3356947	0.657382	0.989257	0.820961	0.970426	0.730121	0.979751
HG00728	NYGC_Illumina	clair3	HG002_hiconf	542215	3267123	418117	3357405	0.626681	0.988879	0.804741	0.962729	0.704637	0.975629
HG01046	NYGC_Illumina	clair3	HG002_hiconf	539113	3262762	441795	3347845	0.68473	0.990647	0.827354	0.965925	0.749316	0.97813
HG01122	NYGC_Illumina	clair3	HG002_hiconf	556933	3369533	426428	3449362	0.631453	0.98703	0.816916	0.964585	0.71231	0.975678
HG01281	NYGC_Illumina	clair3	HG002_hiconf	549424	3348593	423710	3433706	0.640018	0.990327	0.822086	0.966206	0.719716	0.978118
HG01312	NYGC_Illumina	clair3	HG002_hiconf	564917	3433192	447791	3516740	0.662113	0.990613	0.826881	0.967524	0.735381	0.978933
HG01363	NYGC_Illumina	clair3	HG002_hiconf	576821	3488615	464984	3574362	0.667347	0.990505	0.819362	0.967201	0.735583	0.978714
HG01369	NYGC_Illumina	clair3	HG002_hiconf	562318	3402462	453910	3486343	0.665344	0.989779	0.816263	0.966391	0.733117	0.977945
HG01372	NYGC_Illumina	clair3	HG002_hiconf	549277	3348536	429645	3429231	0.653193	0.990132	0.82736	0.967255	0.730032	0.97856
HG01395	NYGC_Illumina	clair3	HG002_hiconf	552243	3363060	459030	3438675	0.695768	0.990644	0.8289	0.969276	0.756522	0.979843
HG01414	NYGC_Illumina	clair3	HG002_hiconf	568006	3450210	447701	3524566	0.651204	0.988139	0.81814	0.967724	0.725189	0.977825
HG01468	NYGC_Illumina	clair3	HG002_hiconf	533773	3259778	406070	3344523	0.625002	0.990436	0.814047	0.965783	0.707107	0.977954
HG01501	NYGC_Illumina	clair3	HG002_hiconf	541474	3307518	415465	3366598	0.632067	0.986123	0.816049	0.969219	0.712371	0.977598
HG01615	NYGC_Illumina	clair3	HG002_hiconf	540742	3293665	433618	3345896	0.667832	0.984524	0.825058	0.969535	0.738166	0.976972
HG01695	NYGC_Illumina	clair3	HG002_hiconf	545254	3322452	422420	3382001	0.64465	0.985637	0.824329	0.968669	0.723501	0.977079
HG01790	NYGC_Illumina	clair3	HG002_hiconf	535643	3260907	437094	3351478	0.680026	0.993342	0.825573	0.966906	0.745764	0.979946
HG01797	NYGC_Illumina	clair3	HG002_hiconf	540073	3273335	423471	3363582	0.641589	0.989731	0.810438	0.963656	0.716196	0.976519
HG01801	NYGC_Illumina	clair3	HG002_hiconf	541441	3279446	430258	3370120	0.642611	0.990558	0.800754	0.964395	0.713019	0.977302
HG01812	NYGC_Illumina	clair3	HG002_hiconf	539083	3265283	410587	3355835	0.626872	0.990681	0.815084	0.964432	0.708695	0.97738
HG01862	NYGC_Illumina	clair3	HG002_hiconf	542447	3282529	451430	3375793	0.681757	0.991269	0.810877	0.964349	0.740732	0.977624
HG02048	NYGC_Illumina	clair3	HG002_hiconf	541868	3277198	439144	3349627	0.677006	0.986489	0.827489	0.965603	0.744722	0.975934
HG02051	NYGC_Illumina	clair3	HG002_hiconf	673701	4036169	512313	4128065	0.624373	0.98781	0.811764	0.966364	0.705843	0.97697
HG02102	NYGC_Illumina	clair3	HG002_hiconf	530619	3213083	422587	3295757	0.661705	0.989114	0.822818	0.964785	0.733518	0.976798
HG02185	NYGC_Illumina	clair3	HG002_hiconf	539642	3268516	431555	3340691	0.658296	0.985862	0.815117	0.96501	0.728361	0.975325
HG02252	NYGC_Illumina	clair3	HG002_hiconf	541509	3272497	422189	3355895	0.648673	0.987353	0.823934	0.963215	0.725874	0.975134
HG02262	NYGC_Illumina	clair3	HG002_hiconf	532237	3232187	437047	3317983	0.687722	0.9902	0.829593	0.965031	0.752025	0.977454
HG02282	NYGC_Illumina	clair3	HG002_hiconf	658177	3958618	488176	4051239	0.612183	0.989443	0.816654	0.967385	0.699789	0.97829
HG02312	NYGC_Illumina	clair3	HG002_hiconf	543197	3297738	430646	3395446	0.663279	0.992571	0.828525	0.964471	0.73675	0.978319
HG02345	NYGC_Illumina	clair3	HG002_hiconf	559895	3393129	456280	3491297	0.674894	0.992574	0.819769	0.965097	0.74031	0.978643
HG02373	NYGC_Illumina	clair3	HG002_hiconf	544173	3280327	441010	3366248	0.67322	0.989396	0.82217	0.964613	0.740276	0.976847
HG02389	NYGC_Illumina	clair3	HG002_hiconf	538562	3269510	454021	3359260	0.712197	0.991855	0.836325	0.965833	0.769286	0.978671
HG02396	NYGC_Illumina	clair3	HG002_hiconf	542552	3269091	449269	3342499	0.679815	0.987694	0.81297	0.96645	0.740454	0.976957
HG02409	NYGC_Illumina	clair3	HG002_hiconf	540293	3282094	449826	3375862	0.692502	0.991624	0.823312	0.96456	0.752263	0.977905
HG02502	NYGC_Illumina	clair3	HG002_hiconf	659584	3954501	496132	4060591	0.621572	0.990592	0.817295	0.965266	0.706122	0.977765
HG02614	NYGC_Illumina	clair3	HG002_hiconf	670038	4014295	511857	4111820	0.634585	0.989229	0.820997	0.966358	0.715854	0.97766
HG02615	NYGC_Illumina	clair3	HG002_hiconf	667094	4015989	508358	4094971	0.633359	0.989027	0.821569	0.97054	0.71529	0.979696
HG02694	NYGC_Illumina	clair3	HG002_hiconf	534219	3249708	425386	3330302	0.660366	0.990455	0.821376	0.966926	0.732123	0.978549
HG02731	NYGC_Illumina	clair3	HG002_hiconf	557199	3372838	443973	3464461	0.655337	0.991142	0.814002	0.965395	0.726103	0.978099
HG02817	NYGC_Illumina	clair3	HG002_hiconf	670933	4019542	503711	4099872	0.620765	0.986299	0.817649	0.967524	0.705733	0.976821
HG02974	NYGC_Illumina	clair3	HG002_hiconf	671826	4032023	510857	4121523	0.62995	0.988569	0.819	0.967658	0.712142	0.978002
HG02979	NYGC_Illumina	clair3	HG002_hiconf	673552	4028537	526552	4115965	0.649233	0.989082	0.820747	0.968664	0.724984	0.978767
HG03022	NYGC_Illumina	clair3	HG002_hiconf	536996	3264986	425322	3359191	0.656997	0.992471	0.821639	0.965113	0.730152	0.978601
HG03069	NYGC_Illumina	clair3	HG002_hiconf	684224	4078311	524728	4174515	0.629674	0.987744	0.811563	0.965545	0.709141	0.976518
HG03120	NYGC_Illumina	clair3	HG002_hiconf	676686	4047889	515693	4117722	0.618938	0.984857	0.803048	0.968666	0.699074	0.976695
HG03121	NYGC_Illumina	clair3	HG002_hiconf	673230	4032207	527335	4125405	0.651015	0.990664	0.821451	0.968863	0.726369	0.979642
HG03168	NYGC_Illumina	clair3	HG002_hiconf	670381	4019222	514573	4106373	0.63945	0.988961	0.823504	0.968539	0.719899	0.978643
HG03279	NYGC_Illumina	clair3	HG002_hiconf	673626	4029518	508037	4118762	0.618742	0.986937	0.811301	0.966123	0.702058	0.976419
HG03499	NYGC_Illumina	clair3	HG002_hiconf	675640	4029258	519136	4108121	0.632729	0.985657	0.814076	0.967297	0.712037	0.976391
HG03548	NYGC_Illumina	clair3	HG002_hiconf	681562	4081178	508831	4172254	0.611312	0.985911	0.809522	0.964945	0.696592	0.975315
HG03563	NYGC_Illumina	clair3	HG002_hiconf	677299	4056704	539521	4164963	0.656666	0.990276	0.814706	0.965083	0.727198	0.977517
HG03571	NYGC_Illumina	clair3	HG002_hiconf	677746	4056587	514549	4138782	0.619259	0.984166	0.806623	0.965126	0.700631	0.974553
HG03631	NYGC_Illumina	clair3	HG002_hiconf	551712	3351234	445278	3423857	0.66787	0.985826	0.819322	0.965297	0.735884	0.975453
HG03643	NYGC_Illumina	clair3	HG002_hiconf	550795	3343181	426066	3438227	0.641184	0.991735	0.820786	0.964759	0.719953	0.978061
HG03646	NYGC_Illumina	clair3	HG002_hiconf	553626	3348564	430691	3437896	0.643866	0.988976	0.819246	0.963721	0.721045	0.976185
HG03668	NYGC_Illumina	clair3	HG002_hiconf	553547	3372727	427163	3458091	0.63817	0.991086	0.818737	0.967077	0.717264	0.978934
HG03717	NYGC_Illumina	clair3	HG002_hiconf	550980	3346893	428730	3425070	0.635502	0.988262	0.809017	0.966149	0.711838	0.977081
HG03731	NYGC_Illumina	clair3	HG002_hiconf	551765	3351877	446694	3426308	0.676192	0.987113	0.826765	0.966117	0.743936	0.976502
HG03744	NYGC_Illumina	clair3	HG002_hiconf	555969	3372777	437458	3473363	0.653925	0.991142	0.82284	0.962887	0.728722	0.97681
HG03770	NYGC_Illumina	clair3	HG002_hiconf	549728	3331849	431938	3425684	0.646387	0.989982	0.814698	0.963341	0.720848	0.97648
HG03774	NYGC_Illumina	clair3	HG002_hiconf	552223	3346641	442657	3427093	0.669552	0.989494	0.826782	0.966708	0.739907	0.977968
HG03814	NYGC_Illumina	clair3	HG002_hiconf	550881	3345883	431841	3400476	0.640322	0.982495	0.808724	0.967166	0.714737	0.97477
HG03861	NYGC_Illumina	clair3	HG002_hiconf	549485	3333911	448497	3401153	0.680754	0.98776	0.825635	0.968677	0.746227	0.978125
HG03864	NYGC_Illumina	clair3	HG002_hiconf	550698	3339637	425844	3426162	0.641143	0.98961	0.821031	0.96507	0.720021	0.977186
HG03868	NYGC_Illumina	clair3	HG002_hiconf	549731	3335373	429797	3407883	0.640466	0.985946	0.811174	0.965403	0.715783	0.975566
HG03898	NYGC_Illumina	clair3	HG002_hiconf	544933	3308908	428825	3382678	0.648537	0.987672	0.816373	0.966563	0.72284	0.977004
HG03919	NYGC_Illumina	clair3	HG002_hiconf	555377	3360636	433462	3426957	0.639623	0.983313	0.811338	0.964721	0.71532	0.973928
HG03971	NYGC_Illumina	clair3	HG002_hiconf	555774	3375553	440901	3455973	0.65631	0.988086	0.819046	0.965532	0.728703	0.976679
HG04054	NYGC_Illumina	clair3	HG002_hiconf	551834	3346569	433011	3422695	0.641872	0.987705	0.8101	0.966172	0.71624	0.97682
HG04063	NYGC_Illumina	clair3	HG002_hiconf	551261	3343620	431744	3418341	0.641613	0.987325	0.811353	0.966176	0.716568	0.976636
HG04216	NYGC_Illumina	clair3	HG002_hiconf	553201	3354237	439364	3443411	0.652582	0.989692	0.813587	0.964498	0.724244	0.976933
GM18501	NYGC_Illumina	PMDV	HG002_hiconf	678264	4041959	565390	4130973	0.698278	0.992261	0.825584	0.971164	0.756614	0.981599
GM18519	NYGC_Illumina	PMDV	HG002_hiconf	672548	4028218	563304	4119529	0.696332	0.992579	0.819506	0.970864	0.752915	0.981602
GM18856	NYGC_Illumina	PMDV	HG002_hiconf	676145	4044619	558323	4131672	0.686314	0.992061	0.819954	0.971433	0.747206	0.981639
GM18861	NYGC_Illumina	PMDV	HG002_hiconf	677542	4058292	582132	4142638	0.717767	0.992018	0.823669	0.972104	0.76708	0.98196
GM18864	NYGC_Illumina	PMDV	HG002_hiconf	674454	4036829	573953	4134873	0.713585	0.992349	0.826914	0.969082	0.766081	0.980578
GM18865	NYGC_Illumina	PMDV	HG002_hiconf	673255	4021982	575810	4121604	0.716216	0.993027	0.825361	0.969292	0.766925	0.981016
GM18871	NYGC_Illumina	PMDV	HG002_hiconf	675660	4042365	575369	4132228	0.716714	0.992486	0.829874	0.971161	0.769154	0.981708
GM18876	NYGC_Illumina	PMDV	HG002_hiconf	673201	4028563	574489	4117544	0.712674	0.99254	0.823415	0.971391	0.764053	0.981852
GM18924	NYGC_Illumina	PMDV	HG002_hiconf	672867	4027415	552540	4117290	0.677687	0.992297	0.814529	0.970924	0.739833	0.981494
GM19035	NYGC_Illumina	PMDV	HG002_hiconf	673196	4019081	545780	4125957	0.665586	0.9917	0.810074	0.966273	0.730756	0.978821
GM19041	NYGC_Illumina	PMDV	HG002_hiconf	670211	4018140	565823	4134297	0.696494	0.992419	0.813602	0.964807	0.750507	0.978418
GM19308	NYGC_Illumina	PMDV	HG002_hiconf	675150	4036869	564419	4150468	0.691514	0.992919	0.815433	0.966026	0.748379	0.979288
GM19312	NYGC_Illumina	PMDV	HG002_hiconf	670500	4020715	568786	4124292	0.703779	0.992192	0.818141	0.967544	0.756663	0.979713
GM19462	NYGC_Illumina	PMDV	HG002_hiconf	673304	4034057	568164	4136575	0.691757	0.989052	0.808891	0.964813	0.745753	0.976782
GM19471	NYGC_Illumina	PMDV	HG002_hiconf	672885	4028759	570885	4142620	0.702579	0.992617	0.816208	0.965621	0.755143	0.978933
GM19473	NYGC_Illumina	PMDV	HG002_hiconf	675747	4025869	576591	4149032	0.707028	0.993186	0.817068	0.963975	0.758075	0.978363
HG00105	NYGC_Illumina	PMDV	HG002_hiconf	535280	3271220	471635	3355790	0.742307	0.995134	0.832688	0.970281	0.784904	0.98255
HG00110	NYGC_Illumina	PMDV	HG002_hiconf	530424	3238038	439199	3318001	0.685178	0.994148	0.818654	0.970386	0.745993	0.982123
HG00121	NYGC_Illumina	PMDV	HG002_hiconf	531896	3248620	444928	3327893	0.683384	0.993948	0.808504	0.970473	0.740697	0.98207
HG00127	NYGC_Illumina	PMDV	HG002_hiconf	533905	3252203	424597	3329865	0.651247	0.992536	0.810215	0.969596	0.722085	0.980932
HG00136	NYGC_Illumina	PMDV	HG002_hiconf	536013	3268076	455956	3351012	0.710828	0.994624	0.826332	0.970202	0.76424	0.982261
HG00151	NYGC_Illumina	PMDV	HG002_hiconf	535827	3260142	459751	3343095	0.717659	0.994664	0.826739	0.970159	0.768347	0.982259
HG00331	NYGC_Illumina	PMDV	HG002_hiconf	537296	3274030	448788	3352487	0.694375	0.994198	0.82203	0.971136	0.752829	0.982532
HG00410	NYGC_Illumina	PMDV	HG002_hiconf	542793	3286788	459345	3385410	0.701413	0.994156	0.819058	0.965457	0.755684	0.979596
HG00473	NYGC_Illumina	PMDV	HG002_hiconf	544238	3302123	471385	3384536	0.727762	0.99379	0.83016	0.969843	0.775596	0.98167
HG00525	NYGC_Illumina	PMDV	HG002_hiconf	537976	3262931	450677	3350054	0.696139	0.994042	0.82169	0.968419	0.753722	0.981063
HG00599	NYGC_Illumina	PMDV	HG002_hiconf	543318	3273843	466111	3372431	0.710639	0.994066	0.818947	0.965232	0.760958	0.979436
HG00631	NYGC_Illumina	PMDV	HG002_hiconf	540087	3271899	444782	3365615	0.67621	0.993319	0.812205	0.965885	0.737994	0.97941
HG00675	NYGC_Illumina	PMDV	HG002_hiconf	544858	3292069	451620	3382790	0.681166	0.992794	0.812962	0.966393	0.741252	0.979416
HG00705	NYGC_Illumina	PMDV	HG002_hiconf	539381	3267597	457981	3352345	0.707079	0.994121	0.822914	0.969223	0.760612	0.981514
HG00706	NYGC_Illumina	PMDV	HG002_hiconf	541101	3291379	452448	3365365	0.693926	0.994571	0.820622	0.972942	0.751975	0.983638
HG00728	NYGC_Illumina	PMDV	HG002_hiconf	542215	3267123	433124	3358601	0.653141	0.992487	0.808464	0.965669	0.72255	0.978895
HG01046	NYGC_Illumina	PMDV	HG002_hiconf	539113	3262762	467014	3353336	0.72411	0.994509	0.826577	0.967864	0.771958	0.981005
HG01122	NYGC_Illumina	PMDV	HG002_hiconf	556933	3369533	447996	3457938	0.662076	0.992587	0.814141	0.967406	0.730277	0.979835
HG01281	NYGC_Illumina	PMDV	HG002_hiconf	549424	3348593	448597	3431318	0.66951	0.993178	0.811151	0.969433	0.733556	0.981162
HG01312	NYGC_Illumina	PMDV	HG002_hiconf	564917	3433192	475714	3515807	0.695766	0.993851	0.816556	0.970694	0.751337	0.982136
HG01363	NYGC_Illumina	PMDV	HG002_hiconf	576821	3488615	490061	3577764	0.707275	0.993927	0.822524	0.969374	0.760558	0.981497
HG01369	NYGC_Illumina	PMDV	HG002_hiconf	562318	3402462	476218	3492855	0.7054	0.99436	0.823207	0.968823	0.759764	0.981425
HG01372	NYGC_Illumina	PMDV	HG002_hiconf	549277	3348536	460963	3432167	0.684946	0.993925	0.807614	0.969907	0.741239	0.981769
HG01395	NYGC_Illumina	PMDV	HG002_hiconf	552243	3363060	482705	3444797	0.736638	0.994576	0.833031	0.971165	0.781874	0.982731
HG01414	NYGC_Illumina	PMDV	HG002_hiconf	568006	3450210	471818	3535613	0.688313	0.993946	0.819006	0.970142	0.747994	0.9819
HG01468	NYGC_Illumina	PMDV	HG002_hiconf	533773	3259778	430569	3332926	0.656262	0.991749	0.805439	0.970194	0.723238	0.980853
HG01501	NYGC_Illumina	PMDV	HG002_hiconf	541474	3307518	436669	3375861	0.663725	0.991114	0.814067	0.971243	0.731249	0.981078
HG01615	NYGC_Illumina	PMDV	HG002_hiconf	540742	3293665	460488	3372310	0.71027	0.994083	0.825031	0.971115	0.763362	0.982465
HG01695	NYGC_Illumina	PMDV	HG002_hiconf	545254	3322452	451386	3400989	0.679349	0.993843	0.812006	0.971093	0.739778	0.982337
HG01790	NYGC_Illumina	PMDV	HG002_hiconf	535643	3260907	462725	3346899	0.719029	0.994721	0.822782	0.969364	0.767415	0.981879
HG01797	NYGC_Illumina	PMDV	HG002_hiconf	540073	3273335	442473	3357301	0.673116	0.992172	0.812389	0.967584	0.736224	0.979724
HG01801	NYGC_Illumina	PMDV	HG002_hiconf	541441	3279446	446019	3365832	0.672539	0.9926	0.80678	0.967349	0.733568	0.979812
HG01812	NYGC_Illumina	PMDV	HG002_hiconf	539083	3265283	434277	3349455	0.654372	0.992526	0.803646	0.967802	0.721368	0.980008
HG01862	NYGC_Illumina	PMDV	HG002_hiconf	542447	3282529	471275	3378616	0.724058	0.994551	0.823118	0.96651	0.770417	0.98033
HG02048	NYGC_Illumina	PMDV	HG002_hiconf	541868	3277198	465433	3366333	0.716879	0.993501	0.825461	0.967417	0.767348	0.980286
HG02051	NYGC_Illumina	PMDV	HG002_hiconf	673701	4036169	537777	4133721	0.65603	0.992107	0.810596	0.968981	0.725168	0.980408
HG02102	NYGC_Illumina	PMDV	HG002_hiconf	530619	3213083	445769	3304500	0.695876	0.994182	0.819469	0.966914	0.752632	0.980358
HG02185	NYGC_Illumina	PMDV	HG002_hiconf	539642	3268516	451558	3358784	0.696803	0.994016	0.823248	0.967518	0.754766	0.980588
HG02252	NYGC_Illumina	PMDV	HG002_hiconf	541509	3272497	451194	3368108	0.679448	0.993629	0.806903	0.965622	0.737711	0.979425
HG02262	NYGC_Illumina	PMDV	HG002_hiconf	532237	3232187	464018	3322622	0.728794	0.993896	0.826834	0.967065	0.774725	0.980297
HG02282	NYGC_Illumina	PMDV	HG002_hiconf	658177	3958618	515387	4042430	0.638233	0.991334	0.805009	0.971036	0.711985	0.98108
HG02312	NYGC_Illumina	PMDV	HG002_hiconf	543197	3297738	460339	3389085	0.693594	0.993751	0.809427	0.967166	0.747047	0.980278
HG02345	NYGC_Illumina	PMDV	HG002_hiconf	559895	3393129	480393	3489746	0.713511	0.994427	0.821663	0.96711	0.763777	0.980578
HG02373	NYGC_Illumina	PMDV	HG002_hiconf	544173	3280327	464520	3374694	0.712472	0.994244	0.824785	0.966688	0.764526	0.980272
HG02389	NYGC_Illumina	PMDV	HG002_hiconf	538562	3269510	483264	3362387	0.748573	0.99481	0.824853	0.967561	0.784864	0.980996
HG02396	NYGC_Illumina	PMDV	HG002_hiconf	542552	3269091	469023	3358740	0.723048	0.994388	0.82652	0.968057	0.771329	0.981046
HG02409	NYGC_Illumina	PMDV	HG002_hiconf	540293	3282094	471580	3374525	0.732628	0.994149	0.829308	0.967143	0.777976	0.98046
HG02502	NYGC_Illumina	PMDV	HG002_hiconf	659584	3954501	524502	4051125	0.647875	0.991976	0.80435	0.968573	0.717682	0.980135
HG02614	NYGC_Illumina	PMDV	HG002_hiconf	670038	4014295	542987	4106850	0.66267	0.991609	0.806673	0.969558	0.727615	0.98046
HG02615	NYGC_Illumina	PMDV	HG002_hiconf	667094	4015989	536875	4094726	0.661935	0.992245	0.811349	0.973461	0.729066	0.982764
HG02694	NYGC_Illumina	PMDV	HG002_hiconf	534219	3249708	453071	3334174	0.702781	0.994296	0.819622	0.969326	0.756718	0.981652
HG02731	NYGC_Illumina	PMDV	HG002_hiconf	557199	3372838	465456	3464017	0.689334	0.994028	0.81519	0.968086	0.746998	0.980885
HG02817	NYGC_Illumina	PMDV	HG002_hiconf	670933	4019542	535308	4109717	0.651426	0.991675	0.805947	0.970199	0.720495	0.980819
HG02974	NYGC_Illumina	PMDV	HG002_hiconf	671826	4032023	541111	4120964	0.661481	0.991884	0.810187	0.970757	0.728321	0.981207
HG02979	NYGC_Illumina	PMDV	HG002_hiconf	673552	4028537	558016	4120157	0.686767	0.992787	0.817536	0.970996	0.746467	0.98177
HG03022	NYGC_Illumina	PMDV	HG002_hiconf	536996	3264986	451183	3351844	0.694165	0.994078	0.817298	0.96854	0.750716	0.981143
HG03069	NYGC_Illumina	PMDV	HG002_hiconf	684224	4078311	552448	4179980	0.664646	0.991935	0.811557	0.96811	0.730791	0.979878
HG03120	NYGC_Illumina	PMDV	HG002_hiconf	676686	4047889	536294	4131184	0.650371	0.991298	0.809351	0.971587	0.721204	0.981344
HG03121	NYGC_Illumina	PMDV	HG002_hiconf	673230	4032207	557906	4119641	0.687104	0.992239	0.817365	0.971466	0.746595	0.981743
HG03168	NYGC_Illumina	PMDV	HG002_hiconf	670381	4019222	546093	4108565	0.671496	0.992501	0.813274	0.971188	0.735616	0.981728
HG03279	NYGC_Illumina	PMDV	HG002_hiconf	673626	4029518	533095	4124132	0.648879	0.991753	0.808908	0.969272	0.72011	0.980383
HG03499	NYGC_Illumina	PMDV	HG002_hiconf	675640	4029258	545800	4122813	0.667413	0.991814	0.814872	0.969596	0.733808	0.980579
HG03548	NYGC_Illumina	PMDV	HG002_hiconf	681562	4081178	534095	4180830	0.640658	0.991549	0.80663	0.968194	0.714127	0.979732
HG03563	NYGC_Illumina	PMDV	HG002_hiconf	677299	4056704	567383	4163377	0.693338	0.992838	0.815766	0.967665	0.749586	0.98009
HG03571	NYGC_Illumina	PMDV	HG002_hiconf	677746	4056587	540108	4158190	0.653603	0.991686	0.809077	0.967725	0.723077	0.979559
HG03631	NYGC_Illumina	PMDV	HG002_hiconf	551712	3351234	470387	3442005	0.709352	0.992757	0.822476	0.966746	0.761737	0.979579
HG03643	NYGC_Illumina	PMDV	HG002_hiconf	550795	3343181	450505	3431169	0.669868	0.99324	0.809962	0.967967	0.733284	0.980441
HG03646	NYGC_Illumina	PMDV	HG002_hiconf	553626	3348564	455768	3443110	0.675969	0.993822	0.811841	0.966737	0.737701	0.980092
HG03668	NYGC_Illumina	PMDV	HG002_hiconf	553547	3372727	449236	3453878	0.666014	0.993129	0.81124	0.970009	0.731488	0.981433
HG03717	NYGC_Illumina	PMDV	HG002_hiconf	550980	3346893	447651	3430501	0.668267	0.993194	0.813384	0.969194	0.733719	0.981047
HG03731	NYGC_Illumina	PMDV	HG002_hiconf	551765	3351877	474520	3442573	0.71544	0.993741	0.82241	0.967777	0.765205	0.980587
HG03744	NYGC_Illumina	PMDV	HG002_hiconf	555969	3372777	464704	3469676	0.687346	0.993333	0.813094	0.965798	0.744951	0.979372
HG03770	NYGC_Illumina	PMDV	HG002_hiconf	549728	3331849	454651	3427534	0.681764	0.993508	0.815032	0.965999	0.742465	0.979561
HG03774	NYGC_Illumina	PMDV	HG002_hiconf	552223	3346641	471793	3436308	0.710188	0.994398	0.821769	0.968675	0.761915	0.981368
HG03814	NYGC_Illumina	PMDV	HG002_hiconf	550881	3345883	450184	3428101	0.676342	0.993112	0.818003	0.969526	0.740458	0.981177
HG03861	NYGC_Illumina	PMDV	HG002_hiconf	549485	3333911	476136	3418709	0.724506	0.994817	0.826552	0.970357	0.772172	0.982435
HG03864	NYGC_Illumina	PMDV	HG002_hiconf	550698	3339637	450073	3428587	0.672134	0.993383	0.813259	0.967819	0.735993	0.980434
HG03868	NYGC_Illumina	PMDV	HG002_hiconf	549731	3335373	450003	3424329	0.677102	0.993599	0.817426	0.968007	0.740676	0.980636
HG03898	NYGC_Illumina	PMDV	HG002_hiconf	544933	3308908	452635	3394220	0.68813	0.993747	0.819203	0.968995	0.747968	0.981215
HG03919	NYGC_Illumina	PMDV	HG002_hiconf	555377	3360636	452149	3454219	0.674009	0.993782	0.818213	0.967087	0.739143	0.980253
HG03971	NYGC_Illumina	PMDV	HG002_hiconf	555774	3375553	464711	3466115	0.693937	0.993472	0.820389	0.96772	0.751883	0.980427
HG04054	NYGC_Illumina	PMDV	HG002_hiconf	551834	3346569	451302	3433407	0.675718	0.993691	0.816967	0.968779	0.739659	0.981077
HG04063	NYGC_Illumina	PMDV	HG002_hiconf	551261	3343620	451327	3429290	0.676569	0.993582	0.816977	0.968976	0.740173	0.981125
HG04216	NYGC_Illumina	PMDV	HG002_hiconf	553201	3354237	460192	3447061	0.687634	0.993555	0.816703	0.967012	0.746632	0.980104

## Sheet: Table S6
Table S6. Chromosome-wise contig break percentages
Percentage of contig breaks and location					Percentage of contig breaks in singletons vs non-singletons
Chromosome	None	Satellite repeats	Near segdup	Near segdup and satellite repeats	Chromosome	Repetitive breaks in 2 or more samples	Non-repetitive breaks in 2 or more samples	Repetitive breaks in singletons	Non-repetitive breaks in singletons
chr1	0.038	0.016	0.741	0.205	chr1	0.1415	0.0024	0.8207	0.0354
chr2	0.062	0.004	0.652	0.282	chr2	0.1479	0.0032	0.7901	0.0588
chr3	0.119	0.143	0.357	0.381	chr3	0.1146	0.0177	0.7667	0.101
chr4	0.032	0.024	0.56	0.384	chr4	0.1191	0.0043	0.8489	0.0277
chr5	0.046	0.006	0.552	0.396	chr5	0.1801	0.0073	0.7738	0.0387
chr6	0.043	0.039	0.386	0.532	chr6	0.2036	0.0015	0.7533	0.0416
chr7	0.019	0.014	0.757	0.21	chr7	0.1661	0.0025	0.8151	0.0163
chr8	0.038	0.001	0.528	0.433	chr8	0.1356	0.0023	0.826	0.0362
chr9	0.018	0.008	0.458	0.516	chr9	0.1721	0.0014	0.8101	0.0164
chr10	0.016	0.003	0.612	0.37	chr10	0.129	0	0.8555	0.0155
chr11	0.044	0.029	0.546	0.381	chr11	0.1633	0.0085	0.793	0.0352
chr12	0.002	0.081	0.331	0.585	chr12	0.142	0	0.8561	0.0019
chr13	0.037	0.03	0.48	0.453	chr13	0.2033	0.0033	0.76	0.0333
chr14	0.052	0.06	0.526	0.362	chr14	0.1381	0.0149	0.8097	0.0373
chr15	0.007	0.003	0.568	0.422	chr15	0.1729	0	0.8204	0.0067
chr16	0.005	0.001	0.637	0.358	chr16	0.1764	0.0008	0.8188	0.004
chr17	0.003	0.003	0.621	0.372	chr17	0.2113	0	0.7854	0.0033
chr18	0.006	0.037	0.468	0.489	chr18	0.1682	0	0.8257	0.0061
chr19	0.002	0.013	0.341	0.643	chr19	0.2106	0	0.7871	0.0022
chr20	0.03	0.042	0.329	0.6	chr20	0.1944	0.0023	0.7755	0.0278
chr21	0	0.018	0.409	0.573	chr21	0.2058	0	0.7942	0
chr22	0	0.028	0.376	0.597	chr22	0.187	0	0.813	0
Overall	0.0294	0.021	0.571	0.379	Overall	0.1629	0.003	0.8076	0.0264

## Sheet: Table S7
Table S7. Masked TEs
Genome	hs1 T2T (%)	100FZ mean ± stdev (%)
ALUs	10.09	10.15 ± 0.113
MIRs	2.65	2.72 ± 0.014
LINE1	16.77	17.11 ± 0.065
LINE2	3.41	3.46 ± 0.018
L3/CR1	0.35	0.36 ± 0.002
ERVL	1.93	1.95 ± 0.009
ERVL-MaLRs	3.63	3.69 ± 0.016
ERV_classI	2.73	2.79 ± 0.023
ERV_classII	0.28	0.28 ± 0.005
hAT-Charlie	1.54	1.55 ± 0.007
TcMar-Tigger	0.1	1.26 ± 0.006
Comparison of major masked transposable element types between the hs1 T2T assembly and the first 100 samples from the 1KGP ONT Sequencing Consortium

## Sheet: Table S8
Table S8. SV Benchmarking
sample_ID	truth	query	mask	TP_base	TP_comp	FP	FN	precision	recall	f1	base_cnt	comp_cnt
HG002	HPRC_HG002	HG002_Napu_hapdiff	GIAB_HG002_SV_Tier1_v0.6	9226	9328	640	540	0.935795	0.944706	0.940229	9766	9968
HG002	HPRC_HG002	HG002_Napu_Sniffles2	GIAB_HG002_SV_Tier1_v0.6	9178	9181	540	588	0.94445	0.939791	0.942115	9766	9721
HG02723	HPRC_HG002723	HG02723_Napu_hapdiff	GIAB_HG002_SV_Tier1_v0.6	12153	12174	1006	1170	0.923672	0.912182	0.917891	13323	13180
HG02723	HPRC_HG002723	HG02723_Napu_Sniffles2	GIAB_HG002_SV_Tier1_v0.6	12315	12467	1317	1008	0.904454	0.924341	0.91429	13323	13784
HG00733	HPRC_HG00733	HG00733_Napu_hapdiff	GIAB_HG002_SV_Tier1_v0.6	9660	9670	950	836	0.910546	0.920351	0.915422	10496	10620
HG00733	HPRC_HG00733	HG00733_Napu_Sniffles2	GIAB_HG002_SV_Tier1_v0.6	9759	9885	1078	737	0.901669	0.929783	0.91551	10496	10963
HG002	HPRC_HG002	HG002_Napu_hapdiff	nomask	18441	18693	5835	9058	0.762109	0.670606	0.713435	27499	24528
HG002	HPRC_HG002	HG002_Napu_Sniffles2	nomask	18406	18383	4299	9093	0.810466	0.669333	0.73317	27499	22682
HG02723	HPRC_HG002723	HG02723_Napu_hapdiff	nomask	21618	21549	4612	11978	0.823707	0.643469	0.722517	33596	26161
HG02723	HPRC_HG002723	HG02723_Napu_Sniffles2	nomask	21686	21986	6387	11910	0.774892	0.645494	0.704298	33596	28373
HG00733	HPRC_HG00733	HG00733_Napu_hapdiff	nomask	18281	18275	4209	9173	0.8128	0.665877	0.73204	27454	22484
HG00733	HPRC_HG00733	HG00733_Napu_Sniffles2	nomask	18249	18543	5900	9205	0.758622	0.664712	0.708569	27454	24443

## Sheet: Table S9
Table S9. SVs in OMIM exons
SV Chr	SV Start	SV End	SV Length	SV Type	Sample count	Sample ID/sex/POP	Exon Chr	Exon start	Exon End	Gene ID	Gene Name	Exon Number	AFR	AMR	EAS	EUR	SAS	XX	XY
chr16	48247412	48247412	458	INS	100	GM18519_XY_AFR_YRI_duplicate16825,GM18856_XY_AFR_YRI_duplicate16705,GM18861_XX_AFR_YRI_duplicate16931,GM18864_XX_AFR_YRI_duplicate16428,GM18865_XY_AFR_YRI_duplicate16782,GM18871_XY_AFR_YRI_duplicate16688,GM18876_XX_AFR_YRI_duplicate16609,GM18924_XX_AFR_YRI_duplicate16536,GM19035_XY_AFR_LWK_duplicate16639,GM19041_XY_AFR_LWK_duplicate16641,GM19308_XY_AFR_LWK_duplicate16830,GM19312_XY_AFR_LWK_duplic…	chr16	48247314	48247539	ENSG00000121270.16	ABCC11	1	1	0	0	0	0	0	1
chr9	133252413	133258230	-5817	DEL	1	HG01369_XX_AMR_CLM_duplicate10137	chr9	133255602	133255670	ENSG00000175164.16	ABO	9	1	0	0	0	0	1	0
chr9	133252413	133258230	-5817	DEL	1	HG01369_XX_AMR_CLM_duplicate10137	chr9	133255675	133256356	ENSG00000175164.16	ABO	8	3	0	0	0	0	2	1
chr9	133252413	133258230	-5817	DEL	1	HG01369_XX_AMR_CLM_duplicate10137	chr9	133257409	133257521	ENSG00000175164.16	ABO	7	1	1	2	0	0	3	1
chr9	133252413	133258230	-5817	DEL	1	HG01369_XX_AMR_CLM_duplicate10137	chr9	133257524	133257542	ENSG00000175164.16	ABO	6	0	0	0	0	3	2	1
chr9	133252413	133258230	-5817	DEL	1	HG01369_XX_AMR_CLM_duplicate10137	chr9	133258097	133258132	ENSG00000175164.16	ABO	5	2	2	0	2	2	5	3
chr15	88855709	88855880	-171	DEL	2	HG00473_XX_EAS_CHS_duplicate13999,HG00631_XY_EAS_CHS_duplicate13659	chr15	88854852	88859417	ENSG00000157766.19	ACAN	12	0	0	1	0	0	0	1
chr15	88856078	88856248	-170	DEL	1	HG02051_XY_AFR_ACB_duplicate15766	chr15	88854852	88859417	ENSG00000157766.19	ACAN	12	0	0	1	0	0	1	0
chr15	88856511	88856511	114	INS	1	HG02373_XY_EAS_CDX_duplicate13813	chr15	88854852	88859417	ENSG00000157766.19	ACAN	12	0	1	0	0	0	1	0
chr15	88855991	88855991	63	INS	1	HG03069_XY_AFR_MSL_duplicate16385	chr15	88854852	88859417	ENSG00000157766.19	ACAN	12	0	1	0	0	0	1	0
chr15	88855795	88856992	-1197	DEL	1	HG03499_XX_AFR_ESN_duplicate16086	chr15	88854852	88859417	ENSG00000157766.19	ACAN	12	0	1	0	0	0	1	0
chr15	88856755	88856812	-57	DEL	15	GM18519_XY_AFR_YRI_duplicate16351,GM18871_XY_AFR_YRI_duplicate16229,GM19312_XY_AFR_LWK_duplicate16114,GM19462_XX_AFR_LWK_duplicate16367,HG01395_XY_AMR_PUR_duplicate14161,HG01615_XY_EUR_IBS_duplicate13852,HG01695_XX_EUR_IBS_duplicate13754,HG01790_XX_EUR_GBR_duplicate14010,HG02051_XY_AFR_ACB_duplicate15767,HG02502_XX_AFR_ACB_duplicate15717,HG02615_XX_AFR_GWD_duplicate15843,HG02694_XX_SAS_PJL_duplic…	chr15	88854852	88859417	ENSG00000157766.19	ACAN	12	0	1	0	0	0	1	0
chr15	88855652	88856108	-456	DEL	9	GM18856_XY_AFR_YRI_duplicate16279,GM18876_XX_AFR_YRI_duplicate16170,GM19308_XY_AFR_LWK_duplicate16376,HG02615_XX_AFR_GWD_duplicate15841,HG02974_XX_AFR_ESN_duplicate15892,HG03279_XX_AFR_ESN_duplicate15804,HG03499_XX_AFR_ESN_duplicate16087,HG03563_XX_AFR_MSL_duplicate16476,HG03571_XY_AFR_MSL_duplicate15871	chr15	88854852	88859417	ENSG00000157766.19	ACAN	12	0	1	0	0	0	1	0
chr15	88856755	88856926	-171	DEL	1	HG03731_XX_SAS_ITU_duplicate14194	chr15	88854852	88859417	ENSG00000157766.19	ACAN	12	1	0	0	1	1	3	0
chr15	88856221	88856506	-285	DEL	1	HG03814_XX_SAS_BEB_duplicate13607	chr15	88854852	88859417	ENSG00000157766.19	ACAN	12	0	0	0	0	1	1	0
chr15	88855823	88856051	-228	DEL	26	GM18519_XY_AFR_YRI_duplicate16350,GM18864_XX_AFR_YRI_duplicate15982,GM18865_XY_AFR_YRI_duplicate16332,GM18871_XY_AFR_YRI_duplicate16228,GM19035_XY_AFR_LWK_duplicate16194,GM19471_XX_AFR_LWK_duplicate16361,GM19473_XX_AFR_LWK_duplicate16216,HG01046_XX_EAS_CDX_duplicate13801,HG01369_XX_AMR_CLM_duplicate14474,HG01372_XX_AMR_CLM_duplicate14071,HG01790_XX_EUR_GBR_duplicate14009,HG02389_XY_EAS_CDX_duplic…	chr15	88854852	88859417	ENSG00000157766.19	ACAN	12	0	0	0	0	1	0	1
chr21	45224512	45224512	995	INS	99	GM18519_XY_AFR_YRI_duplicate20225,GM18856_XY_AFR_YRI_duplicate20147,GM18861_XX_AFR_YRI_duplicate20352,GM18864_XX_AFR_YRI_duplicate19853,GM18865_XY_AFR_YRI_duplicate20267,GM18871_XY_AFR_YRI_duplicate20091,GM18876_XX_AFR_YRI_duplicate20094,GM18924_XX_AFR_YRI_duplicate20023,GM19035_XY_AFR_LWK_duplicate19955,GM19041_XY_AFR_LWK_duplicate20085,GM19308_XY_AFR_LWK_duplicate20189,GM19312_XY_AFR_LWK_duplic…	chr21	45222018	45226560	ENSG00000197381.18	ADARB1	11	20	5	5	3	9	28	14
chr19	14746303	14746303	332	INS	1	GM19312_XY_AFR_LWK_duplicate18512	chr19	14746232	14746323	ENSG00000127507.18	ADGRE2	18	4	0	0	0	0	2	2
chr19	14149683	14149751	-68	DEL	1	HG00331_XX_EUR_FIN_duplicate15967	chr19	14147743	14151615	ENSG00000072071.17	ADGRL1	23	1	0	0	0	0	0	1
chr4	99305501	99305588	-87	DEL	2	HG02102_XX_AMR_PEL_duplicate4739,HG02694_XX_SAS_PJL_duplicate4749	chr4	99304971	99307864	ENSG00000196616.15	ADH1B	9	2	0	0	1	0	2	1
chr3	186858373	186858373	331	INS	8	HG00136_XY_EUR_GBR_duplicate4003,HG01501_XX_EUR_IBS_duplicate4048,HG01695_XX_EUR_IBS_duplicate4182,HG01862_XX_EAS_KHV_duplicate3984,HG02396_XY_EAS_CDX_duplicate3838,HG03643_XX_SAS_STU_duplicate4214,HG03717_XX_SAS_ITU_duplicate4249,HG04063_XX_SAS_ITU_duplicate4082	chr3	186854184	186858463	ENSG00000181092.10	ADIPOQ	3	0	1	0	0	0	1	0
chrX	148500643	148500643	67	INS	1	HG02502_XX_AFR_ACB_duplicate20489	chrX	148500617	148501144	ENSG00000155966.14	AFF2	1	0	1	0	0	0	1	0
chr1	1049050	1049133	-83	DEL	2	GM19035_XY_AFR_LWK_duplicate727,HG03499_XX_AFR_ESN_duplicate877	chr1	1048867	1049059	ENSG00000188157.15	AGRN	24	2	0	0	0	0	2	0
chr10	95647105	95677058	-29953	DEL	1	HG02817_XX_AFR_GWD_duplicate12060	chr10	95653290	95653405	ENSG00000059573.9	ALDH18A1	2	0	0	0	0	1	1	0
chr10	95647105	95677058	-29953	DEL	1	HG02817_XX_AFR_GWD_duplicate12060	chr10	95656597	95656711	ENSG00000059573.9	ALDH18A1	1	2	0	0	0	0	2	0
chr22	49902648	49902791	-143	DEL	1	HG02502_XX_AFR_ACB_duplicate1029	chr22	49900229	49904066	ENSG00000182858.14	ALG12	10	7	0	0	0	0	6	1
chr22	49901758	49901758	65	INS	65	GM18519_XY_AFR_YRI_duplicate20720,GM18856_XY_AFR_YRI_duplicate20641,GM18861_XX_AFR_YRI_duplicate20863,GM18864_XX_AFR_YRI_duplicate20369,GM18865_XY_AFR_YRI_duplicate20771,GM18871_XY_AFR_YRI_duplicate20592,GM18876_XX_AFR_YRI_duplicate20615,GM18924_XX_AFR_YRI_duplicate20502,GM19035_XY_AFR_LWK_duplicate20448,GM19041_XY_AFR_LWK_duplicate20610,GM19308_XY_AFR_LWK_duplicate20704,GM19312_XY_AFR_LWK_duplic…	chr22	49900229	49904066	ENSG00000182858.14	ALG12	10	3	0	1	0	0	3	1
chr22	49902648	49902791	-143	DEL	56	GM18519_XY_AFR_YRI_duplicate20721,GM18856_XY_AFR_YRI_duplicate20642,GM18861_XX_AFR_YRI_duplicate20864,GM18864_XX_AFR_YRI_duplicate20370,GM18865_XY_AFR_YRI_duplicate20772,GM18871_XY_AFR_YRI_duplicate20593,GM18876_XX_AFR_YRI_duplicate20616,GM18924_XX_AFR_YRI_duplicate20503,GM19035_XY_AFR_LWK_duplicate20449,GM19041_XY_AFR_LWK_duplicate20611,GM19308_XY_AFR_LWK_duplicate20705,GM19312_XY_AFR_LWK_duplic…	chr22	49900229	49904066	ENSG00000182858.14	ALG12	10	2	6	0	0	1	7	2
chr5	112845590	112845590	6067	INS	1	HG00525_XX_EAS_CHS_duplicate5834	chr5	112837553	112846239	ENSG00000134982.18	APC	16	0	0	0	0	2	2	0
chr10	122457344	122457731	-387	DEL	4	GM18861_XX_AFR_YRI_duplicate12483,GM19312_XY_AFR_LWK_duplicate12307,HG03279_XX_AFR_ESN_duplicate49,HG03861_XX_SAS_ITU_duplicate10676	chr10	122456907	122457352	ENSG00000254636.1	ARMS2	2	9	9	18	8	5	33	16
chr13	112884735	112884735	59	INS	1	HG01797_XX_EAS_CDX_duplicate12634	chr13	112881876	112887168	ENSG00000068650.19	ATP11A	30	17	4	14	0	8	30	13
chr13	112884735	112884794	-59	DEL	40	GM18519_XY_AFR_YRI_duplicate15267,GM18861_XX_AFR_YRI_duplicate15376,GM18864_XX_AFR_YRI_duplicate14979,GM19035_XY_AFR_LWK_duplicate15116,GM19312_XY_AFR_LWK_duplicate15041,GM19471_XX_AFR_LWK_duplicate15314,HG00105_XY_EUR_GBR_duplicate13148,HG00121_XX_EUR_GBR_duplicate12718,HG00136_XY_EUR_GBR_duplicate12900,HG00151_XY_EUR_GBR_duplicate13051,HG00473_XX_EAS_CHS_duplicate13109,HG00631_XY_EAS_CHS_duplic…	chr13	112881876	112887168	ENSG00000068650.19	ATP11A	30	1	0	0	0	0	0	1
chr14	92060270	92060270	63	INS	1	HG03548_XX_AFR_MSL_duplicate15350	chr14	92058552	92064414	ENSG00000066427.25	ATXN3	11	0	0	1	0	0	1	0
chr14	92071010	92071010	60	INS	12	GM18519_XY_AFR_YRI_duplicate15764,GM18865_XY_AFR_YRI_duplicate15774,GM18876_XX_AFR_YRI_duplicate15564,GM19035_XY_AFR_LWK_duplicate15603,GM19462_XX_AFR_LWK_duplicate15797,HG02048_XX_EAS_KHV_duplicate13401,HG02614_XX_AFR_GWD_duplicate15472,HG02615_XX_AFR_GWD_duplicate15314,HG03069_XY_AFR_MSL_duplicate15768,HG03279_XX_AFR_ESN_duplicate15280,HG03499_XX_AFR_ESN_duplicate15538,HG03643_XX_SAS_STU_duplic…	chr14	92070935	92071053	ENSG00000066427.25	ATXN3	10	0	0	1	0	0	1	0
chr2	214726966	214727027	-61	DEL	8	GM18861_XX_AFR_YRI_duplicate3297,GM18864_XX_AFR_YRI_duplicate3158,GM18924_XX_AFR_YRI_duplicate3372,GM19462_XX_AFR_LWK_duplicate3281,GM19473_XX_AFR_LWK_duplicate3291,HG02051_XY_AFR_ACB_duplicate3619,HG02974_XX_AFR_ESN_duplicate3588,HG03279_XX_AFR_ESN_duplicate3574	chr2	214725646	214729008	ENSG00000138376.11	BARD1	11	0	0	1	0	0	1	0
chr15	72737922	72737922	123	INS	1	HG02389_XY_EAS_CDX_duplicate13780	chr15	72737478	72738473	ENSG00000140463.14	BBS4	16	0	0	1	0	0	1	0
chr2	169506178	169506178	144	INS	1	HG01812_XX_EAS_CDX_duplicate3035	chr2	169504481	169506655	ENSG00000163093.12	BBS5	12	0	0	2	0	0	1	1
chr2	169505983	169505983	78	INS	1	HG02252_XX_AMR_PEL_duplicate2844	chr2	169504481	169506655	ENSG00000163093.12	BBS5	12	0	0	0	0	1	1	0
chr4	122211056	122211056	249	INS	1	HG03279_XX_AFR_ESN_duplicate5764	chr4	122210887	122211095	ENSG00000138688.17	BLTP1	20	1	0	0	0	0	0	1
chr2	202560308	202560308	337	INS	1	HG03868_XX_SAS_ITU_duplicate2992	chr2	202559696	202567749	ENSG00000204217.16	BMPR2	13	4	0	0	0	0	4	0
chr6	105100306	105100306	135	INS	1	GM19473_XX_AFR_LWK_duplicate7836	chr6	105096822	105101213	ENSG00000112276.14	BVES	8	1	0	0	0	0	0	1
chr11	66744820	66744820	635	INS	1	HG03898_XX_SAS_STU_duplicate11243	chr11	66744769	66744919	ENSG00000173715.19	C11orf80	1	0	0	0	0	1	1	0
chr18	49471328	49478941	-7613	DEL	12	GM18519_XY_AFR_YRI_duplicate18198,GM18856_XY_AFR_YRI_duplicate18072,GM18924_XX_AFR_YRI_duplicate17920,GM19035_XY_AFR_LWK_duplicate17960,GM19471_XX_AFR_LWK_duplicate18293,HG01395_XY_AMR_PUR_duplicate15774,HG02502_XX_AFR_ACB_duplicate17400,HG03069_XY_AFR_MSL_duplicate18201,HG03120_XY_AFR_ESN_duplicate17803,HG03168_XX_AFR_ESN_duplicate17894,HG03563_XX_AFR_MSL_duplicate18369,GM18501_XY_AFR_YRI_duplic…	chr18	49477243	49482410	ENSG00000177576.12	C18orf32	3	0	1	1	0	1	2	1
chr5	40982317	40982317	189	INS	1	HG02694_XX_SAS_PJL_duplicate5528	chr5	40981392	40984643	ENSG00000112936.21	C7	18	32	13	18	9	16	62	26
chr22	39686629	39686629	78	INS	1	HG03717_XX_SAS_ITU_duplicate17199	chr22	39685761	39689735	ENSG00000100346.18	CACNA1I	37	9	1	1	1	2	7	7
chr21	43063074	43063074	68	INS	20	GM18519_XY_AFR_YRI_duplicate20162,GM18861_XX_AFR_YRI_duplicate20293,GM18871_XY_AFR_YRI_duplicate20032,GM19041_XY_AFR_LWK_duplicate20021,GM19462_XX_AFR_LWK_duplicate20229,GM19473_XX_AFR_LWK_duplicate20155,HG00105_XY_EUR_GBR_duplicate17250,HG00121_XX_EUR_GBR_duplicate16729,HG00136_XY_EUR_GBR_duplicate17057,HG01501_XX_EUR_IBS_duplicate16359,HG02282_XX_AFR_ACB_duplicate18972,HG02817_XX_AFR_GWD_duplic…	chr21	43062953	43063078	ENSG00000160200.18	CBS	10	1	0	0	0	0	0	1
chr8	129101433	129120555	-19122	DEL	1	HG02102_XX_AMR_PEL_duplicate8869	chr8	129102290	129102389	ENSG00000229140.12	CCDC26	6	1	0	0	0	0	0	1
chr8	129128785	129132870	-4085	DEL	7	GM18861_XX_AFR_YRI_duplicate10683,GM18864_XX_AFR_YRI_duplicate10405,GM18924_XX_AFR_YRI_duplicate10404,GM19312_XY_AFR_LWK_duplicate10533,GM19471_XX_AFR_LWK_duplicate10602,HG02974_XX_AFR_ESN_duplicate10456,HG03563_XX_AFR_MSL_duplicate10734	chr8	129130023	129130104	ENSG00000229140.12	CCDC26	5	1	0	0	0	0	1	0
chr17	34287689	34287689	3336	INS	1	HG03861_XX_SAS_ITU_duplicate15074	chr17	34287585	34288334	ENSG00000172156.4	CCL11	3	0	0	0	1	0	1	0
chr17	35868096	35871914	-3818	DEL	1	HG01695_XX_EUR_IBS_duplicate14719	chr17	35871491	35872464	ENSG00000271503.7	CCL5	3	0	0	2	0	0	1	1
chr19	7745700	7745907	-207	DEL	1	GM18876_XX_AFR_YRI_duplicate18542	chr19	7745518	7746087	ENSG00000090659.18	CD209	4	0	0	2	0	0	1	1
chr19	7745535	7745535	69	INS	1	HG02345_XX_AMR_PEL_duplicate16290	chr19	7745518	7746087	ENSG00000090659.18	CD209	4	6	0	0	0	0	5	1
chr19	7745535	7745604	-69	DEL	2	HG01695_XX_EUR_IBS_duplicate15718,HG03643_XX_SAS_STU_duplicate15690	chr19	7745518	7746087	ENSG00000090659.18	CD209	4	6	0	0	0	0	5	1
chr7	80630791	80650746	-19955	DEL	1	HG01812_XX_EAS_CDX_duplicate445	chr7	80638642	80638746	ENSG00000135218.19	CD36	1	8	6	12	6	15	30	17
chr7	80630791	80650746	-19955	DEL	1	HG01812_XX_EAS_CDX_duplicate445	chr7	80646088	80646181	ENSG00000135218.19	CD36	2	0	2	2	1	1	5	1
chr7	80630791	80650746	-19955	DEL	1	HG01812_XX_EAS_CDX_duplicate445	chr7	80646652	80646860	ENSG00000135218.19	CD36	3	32	14	20	11	22	70	29
chr11	33734066	33738638	-4572	DEL	1	HG02048_XX_EAS_KHV_duplicate10989	chr11	33736382	33736423	ENSG00000085063.18	CD59	1	2	0	0	0	0	1	1
chr1	22094285	22094596	-311	DEL	5	GM18861_XX_AFR_YRI_duplicate788,GM18865_XY_AFR_YRI_duplicate840,HG02614_XX_AFR_GWD_duplicate1150,HG02817_XX_AFR_GWD_duplicate1200,HG03563_XX_AFR_MSL_duplicate838	chr1	22091428	22101360	ENSG00000070831.18	CDC42	6	1	0	0	0	0	0	1
chr9	133071469	133071469	157	INS	1	HG00728_XY_EAS_CHS_duplicate37	chr9	133070987	133071861	ENSG00000170835.17	CEL	11	1	0	0	0	0	0	1
chr9	133071501	133071601	-100	DEL	3	GM18876_XX_AFR_YRI_duplicate11399,HG01695_XX_EUR_IBS_duplicate9744,HG03731_XX_SAS_ITU_duplicate10004	chr9	133070987	133071861	ENSG00000170835.17	CEL	11	1	0	0	0	0	0	1
chr9	133071233	133071367	-134	DEL	1	HG03864_XY_SAS_ITU_duplicate9679	chr9	133070987	133071861	ENSG00000170835.17	CEL	11	0	0	0	1	0	1	0
chr9	133071337	133071501	-164	DEL	42	GM18519_XY_AFR_YRI_duplicate11526,GM18865_XY_AFR_YRI_duplicate11569,GM18871_XY_AFR_YRI_duplicate11440,GM18924_XX_AFR_YRI_duplicate11261,GM19308_XY_AFR_LWK_duplicate11518,GM19312_XY_AFR_LWK_duplicate11384,GM19462_XX_AFR_LWK_duplicate11457,GM19471_XX_AFR_LWK_duplicate11519,HG00110_XX_EUR_GBR_duplicate9566,HG00136_XY_EUR_GBR_duplicate9685,HG00151_XY_EUR_GBR_duplicate9700,HG00705_XX_EAS_CHS_duplicate…	chr9	133070987	133071861	ENSG00000170835.17	CEL	11	0	0	1	0	0	1	0
chr9	133071270	133071437	-167	DEL	4	GM18856_XY_AFR_YRI_duplicate11385,GM18861_XX_AFR_YRI_duplicate11539,GM19473_XX_AFR_LWK_duplicate11422,GM18501_XY_AFR_YRI_duplicate11543	chr9	133070987	133071861	ENSG00000170835.17	CEL	11	0	1	0	1	0	2	0
chr21	32601006	32601074	-68	DEL	2	HG02614_XX_AFR_GWD_duplicate19524,HG03069_XY_AFR_MSL_duplicate20120	chr21	32599354	32601973	ENSG00000159079.19	CFAP298	7	0	0	0	0	1	1	0
chr1	159888493	159888493	55	INS	4	HG00136_XY_EUR_GBR_duplicate1340,HG00151_XY_EUR_GBR_duplicate1293,HG01372_XX_AMR_CLM_duplicate1492,HG01501_XX_EUR_IBS_duplicate1561	chr1	159888352	159888496	ENSG00000213085.10	CFAP45	4	2	0	0	0	0	0	2
chr1	196970048	196983177	-13129	DEL	1	HG04216_XX_SAS_ITU_duplicate1542	chr1	196977556	196977722	ENSG00000134389.11	CFHR5	1	6	0	0	0	0	4	2
chr1	196970048	196983177	-13129	DEL	1	HG04216_XX_SAS_ITU_duplicate1542	chr1	196982885	196983079	ENSG00000134389.11	CFHR5	2	0	0	0	0	1	1	0
chr8	60867890	60867890	339	INS	1	GM18519_XY_AFR_YRI_duplicate10288	chr8	60865016	60868028	ENSG00000171316.14	CHD7	38	0	0	0	0	1	1	0
chr4	102890805	102891223	-418	DEL	7	HG02502_XX_AFR_ACB_duplicate5719,HG02614_XX_AFR_GWD_duplicate5646,HG02615_XX_AFR_GWD_duplicate5686,HG03120_XY_AFR_ESN_duplicate5808,HG03121_XX_AFR_ESN_duplicate5667,HG03168_XX_AFR_ESN_duplicate5647,HG03548_XX_AFR_MSL_duplicate5835	chr4	102887341	102892807	ENSG00000145354.12	CISD2	3	0	0	0	0	1	1	0
chr16	1457328	1457528	-200	DEL	1	HG00599_XX_EAS_CHS_duplicate13990	chr16	1457254	1457337	ENSG00000103249.19	CLCN7	9	0	1	11	0	7	16	3
chr12	10088631	10091494	-2863	DEL	2	HG01122_XX_AMR_CLM_duplicate11576,HG01372_XX_AMR_CLM_duplicate11849	chr12	10089124	10089222	ENSG00000150048.10	CLEC1A	2	8	9	3	2	6	21	7
chr8	1785249	1785654	-405	DEL	1	HG03022_XX_SAS_PJL_duplicate8305	chr8	1780250	1786570	ENSG00000182372.10	CLN8	3	0	0	0	0	1	1	0
chr8	1785316	1785316	180	INS	2	GM18861_XX_AFR_YRI_duplicate9915,HG03279_XX_AFR_ESN_duplicate454	chr8	1780250	1786570	ENSG00000182372.10	CLN8	3	0	0	0	0	1	1	0
chr8	1785445	1785535	-90	DEL	9	GM19035_XY_AFR_LWK_duplicate9779,HG01281_XX_AMR_CLM_duplicate8278,HG01363_XX_AMR_CLM_duplicate8716,HG01395_XY_AMR_PUR_duplicate8477,HG01414_XX_AMR_PUR_duplicate8708,HG02252_XX_AMR_PEL_duplicate8309,HG02312_XX_AMR_PEL_duplicate8458,HG02614_XX_AFR_GWD_duplicate9836,HG03668_XX_SAS_PJL_duplicate8519	chr8	1780250	1786570	ENSG00000182372.10	CLN8	3	12	6	7	6	15	38	8
chr21	46111586	46111648	-62	DEL	78	GM18519_XY_AFR_YRI_duplicate20283,GM18861_XX_AFR_YRI_duplicate20418,GM18864_XX_AFR_YRI_duplicate19921,GM18865_XY_AFR_YRI_duplicate20329,GM18871_XY_AFR_YRI_duplicate20151,GM18876_XX_AFR_YRI_duplicate20148,GM18924_XX_AFR_YRI_duplicate20074,GM19035_XY_AFR_LWK_duplicate20016,GM19041_XY_AFR_LWK_duplicate20148,GM19308_XY_AFR_LWK_duplicate20249,GM19312_XY_AFR_LWK_duplicate20099,GM19471_XX_AFR_LWK_duplic…	chr21	46111450	46111591	ENSG00000142173.17	COL6A2	2	18	3	7	6	14	34	14
chr1	207555449	207572543	-17094	DEL	4	GM18856_XY_AFR_YRI_duplicate95,GM18876_XX_AFR_YRI_duplicate1711,GM18924_XX_AFR_YRI_duplicate1849,GM19462_XX_AFR_LWK_duplicate1701	chr1	207558538	207558623	ENSG00000203710.12	CR1	20	23	7	13	3	7	38	15
chr1	207555449	207572543	-17094	DEL	4	GM18856_XY_AFR_YRI_duplicate95,GM18876_XX_AFR_YRI_duplicate1711,GM18924_XX_AFR_YRI_duplicate1849,GM19462_XX_AFR_LWK_duplicate1701	chr1	207560739	207561137	ENSG00000203710.12	CR1	21	7	2	0	1	2	8	4
chr1	207555449	207572543	-17094	DEL	4	GM18856_XY_AFR_YRI_duplicate95,GM18876_XX_AFR_YRI_duplicate1711,GM18924_XX_AFR_YRI_duplicate1849,GM19462_XX_AFR_LWK_duplicate1701	chr1	207563864	207564040	ENSG00000203710.12	CR1	22	0	0	0	1	0	0	1
chr1	207555449	207572543	-17094	DEL	4	GM18856_XY_AFR_YRI_duplicate95,GM18876_XX_AFR_YRI_duplicate1711,GM18924_XX_AFR_YRI_duplicate1849,GM19462_XX_AFR_LWK_duplicate1701	chr1	207564132	207564234	ENSG00000203710.12	CR1	23	0	3	1	0	1	5	0
chr1	207555449	207572543	-17094	DEL	4	GM18856_XY_AFR_YRI_duplicate95,GM18876_XX_AFR_YRI_duplicate1711,GM18924_XX_AFR_YRI_duplicate1849,GM19462_XX_AFR_LWK_duplicate1701	chr1	207565838	207565923	ENSG00000203710.12	CR1	24	0	1	0	0	1	2	0
chr1	207555449	207572543	-17094	DEL	4	GM18856_XY_AFR_YRI_duplicate95,GM18876_XX_AFR_YRI_duplicate1711,GM18924_XX_AFR_YRI_duplicate1849,GM19462_XX_AFR_LWK_duplicate1701	chr1	207567824	207568042	ENSG00000203710.12	CR1	25	3	0	0	0	0	1	2
chr1	207555449	207572543	-17094	DEL	4	GM18856_XY_AFR_YRI_duplicate95,GM18876_XX_AFR_YRI_duplicate1711,GM18924_XX_AFR_YRI_duplicate1849,GM19462_XX_AFR_LWK_duplicate1701	chr1	207569059	207569238	ENSG00000203710.12	CR1	26	1	0	0	0	0	1	0
chr1	207555449	207572543	-17094	DEL	4	GM18856_XY_AFR_YRI_duplicate95,GM18876_XX_AFR_YRI_duplicate1711,GM18924_XX_AFR_YRI_duplicate1849,GM19462_XX_AFR_LWK_duplicate1701	chr1	207569847	207569946	ENSG00000203710.12	CR1	27	7	0	0	0	0	6	1
chr1	207526605	207545160	-18555	DEL	2	HG01862_XX_EAS_KHV_duplicate1480,HG02979_XX_AFR_ESN_duplicate1841	chr1	207526753	207526929	ENSG00000203710.12	CR1	6	1	0	0	0	2	3	0
chr1	207526605	207545160	-18555	DEL	2	HG01862_XX_EAS_KHV_duplicate1480,HG02979_XX_AFR_ESN_duplicate1841	chr1	207527021	207527123	ENSG00000203710.12	CR1	7	1	1	0	1	2	2	3
chr1	207526605	207545160	-18555	DEL	2	HG01862_XX_EAS_KHV_duplicate1480,HG02979_XX_AFR_ESN_duplicate1841	chr1	207528716	207528801	ENSG00000203710.12	CR1	8	0	0	0	0	2	2	0
chr1	207526605	207545160	-18555	DEL	2	HG01862_XX_EAS_KHV_duplicate1480,HG02979_XX_AFR_ESN_duplicate1841	chr1	207532180	207532398	ENSG00000203710.12	CR1	9	9	1	2	3	4	15	4
chr1	207526605	207545160	-18555	DEL	2	HG01862_XX_EAS_KHV_duplicate1480,HG02979_XX_AFR_ESN_duplicate1841	chr1	207533409	207533588	ENSG00000203710.12	CR1	10	5	5	4	1	2	13	4
chr1	207526605	207545160	-18555	DEL	2	HG01862_XX_EAS_KHV_duplicate1480,HG02979_XX_AFR_ESN_duplicate1841	chr1	207534197	207534296	ENSG00000203710.12	CR1	11	6	3	1	6	4	15	5
chr1	207526605	207545160	-18555	DEL	2	HG01862_XX_EAS_KHV_duplicate1480,HG02979_XX_AFR_ESN_duplicate1841	chr1	207539981	207540066	ENSG00000203710.12	CR1	12	0	1	0	0	1	2	0
chr1	207526605	207545160	-18555	DEL	2	HG01862_XX_EAS_KHV_duplicate1480,HG02979_XX_AFR_ESN_duplicate1841	chr1	207542182	207542580	ENSG00000203710.12	CR1	13	5	2	3	2	1	9	4
chr1	207543254	207561347	-18093	DEL	4	GM19041_XY_AFR_LWK_duplicate1753,HG01395_XY_AMR_PUR_duplicate1554,HG02409_XY_EAS_CDX_duplicate1505,HG03279_XX_AFR_ESN_duplicate2105	chr1	207545308	207545484	ENSG00000203710.12	CR1	14	16	10	17	9	13	43	22
chr1	207543254	207561347	-18093	DEL	4	GM19041_XY_AFR_LWK_duplicate1753,HG01395_XY_AMR_PUR_duplicate1554,HG02409_XY_EAS_CDX_duplicate1505,HG03279_XX_AFR_ESN_duplicate2105	chr1	207545576	207545678	ENSG00000203710.12	CR1	15	28	14	17	11	21	66	25
chr1	207543254	207561347	-18093	DEL	4	GM19041_XY_AFR_LWK_duplicate1753,HG01395_XY_AMR_PUR_duplicate1554,HG02409_XY_EAS_CDX_duplicate1505,HG03279_XX_AFR_ESN_duplicate2105	chr1	207547271	207547356	ENSG00000203710.12	CR1	16	3	0	0	0	0	1	2
chr1	207543254	207561347	-18093	DEL	4	GM19041_XY_AFR_LWK_duplicate1753,HG01395_XY_AMR_PUR_duplicate1554,HG02409_XY_EAS_CDX_duplicate1505,HG03279_XX_AFR_ESN_duplicate2105	chr1	207550735	207550953	ENSG00000203710.12	CR1	17	2	0	0	0	0	1	1
chr1	207543254	207561347	-18093	DEL	4	GM19041_XY_AFR_LWK_duplicate1753,HG01395_XY_AMR_PUR_duplicate1554,HG02409_XY_EAS_CDX_duplicate1505,HG03279_XX_AFR_ESN_duplicate2105	chr1	207551964	207552143	ENSG00000203710.12	CR1	18	0	0	1	0	0	1	0
chr1	207543254	207561347	-18093	DEL	4	GM19041_XY_AFR_LWK_duplicate1753,HG01395_XY_AMR_PUR_duplicate1554,HG02409_XY_EAS_CDX_duplicate1505,HG03279_XX_AFR_ESN_duplicate2105	chr1	207552752	207552851	ENSG00000203710.12	CR1	19	0	1	0	0	0	1	0
chr1	207543254	207561347	-18093	DEL	4	GM19041_XY_AFR_LWK_duplicate1753,HG01395_XY_AMR_PUR_duplicate1554,HG02409_XY_EAS_CDX_duplicate1505,HG03279_XX_AFR_ESN_duplicate2105	chr1	207558538	207558623	ENSG00000203710.12	CR1	20	0	1	0	0	0	1	0
chr1	207543254	207561347	-18093	DEL	4	GM19041_XY_AFR_LWK_duplicate1753,HG01395_XY_AMR_PUR_duplicate1554,HG02409_XY_EAS_CDX_duplicate1505,HG03279_XX_AFR_ESN_duplicate2105	chr1	207560739	207561137	ENSG00000203710.12	CR1	21	1	0	0	0	0	1	0
chr19	4172439	4172439	68	INS	1	GM19035_XY_AFR_LWK_duplicate18367	chr19	4171656	4173054	ENSG00000060566.14	CREB3L3	10	5	0	0	0	0	4	1
chr7	16089299	16089351	-52	DEL	1	HG03120_XY_AFR_ESN_duplicate8847	chr7	16087525	16091799	ENSG00000214960.11	CRPPA	10	0	0	0	0	1	1	0
chr7	16089460	16089460	52	INS	14	GM18865_XY_AFR_YRI_duplicate8832,GM18924_XX_AFR_YRI_duplicate8578,GM19041_XY_AFR_LWK_duplicate8812,GM19312_XY_AFR_LWK_duplicate8653,GM19462_XX_AFR_LWK_duplicate8663,GM19471_XX_AFR_LWK_duplicate8658,HG00127_XX_EUR_GBR_duplicate7078,HG02345_XX_AMR_PEL_duplicate7570,HG02409_XY_EAS_CDX_duplicate7422,HG02502_XX_AFR_ACB_duplicate8639,HG02694_XX_SAS_PJL_duplicate7439,HG03120_XY_AFR_ESN_duplicate8848,HG0…	chr7	16087525	16091799	ENSG00000214960.11	CRPPA	10	0	0	0	0	1	0	1
chr17	8226645	8226645	141	INS	2	GM18861_XX_AFR_YRI_duplicate17455,HG03069_XY_AFR_MSL_duplicate17304	chr17	8224815	8228319	ENSG00000178971.17	CTC1	23	0	2	1	0	3	4	2
chr10	66519919	66521769	-1850	DEL	1	HG01862_XX_EAS_KHV_duplicate10369	chr10	66520617	66520773	ENSG00000183230.18	CTNNA3	11	0	0	1	0	4	4	1
chr8	11842762	11843074	-312	DEL	1	HG02345_XX_AMR_PEL_duplicate8689	chr8	11842524	11845222	ENSG00000164733.23	CTSB	10	0	0	2	3	3	6	2
chr17	82443764	82443764	96	INS	25	HG00599_XX_EAS_CHS_duplicate15055,HG00631_XY_EAS_CHS_duplicate14837,HG00675_XX_EAS_CHS_duplicate14913,HG01363_XX_AMR_CLM_duplicate15989,HG01395_XY_AMR_PUR_duplicate15503,HG01615_XY_EUR_IBS_duplicate15103,HG01790_XX_EUR_GBR_duplicate15332,HG01801_XX_EAS_CDX_duplicate14767,HG01862_XX_EAS_KHV_duplicate15312,HG02048_XX_EAS_KHV_duplicate15121,HG02102_XX_AMR_PEL_duplicate14849,HG02185_XX_EAS_CDX_duplic…	chr17	82442586	82444124	ENSG00000178927.19	CYBC1	7	6	8	14	8	15	33	18
chr22	42123231	42135383	-12152	DEL	2	GM18861_XX_AFR_YRI_duplicate467,GM19035_XY_AFR_LWK_duplicate20261	chr22	42126499	42126752	ENSG00000100197.23	CYP2D6	9	7	1	0	0	0	3	5
chr22	42123231	42135383	-12152	DEL	2	GM18861_XX_AFR_YRI_duplicate467,GM19035_XY_AFR_LWK_duplicate20261	chr22	42126851	42126992	ENSG00000100197.23	CYP2D6	8	3	0	0	0	0	1	2
chr22	42123231	42135383	-12152	DEL	2	GM18861_XX_AFR_YRI_duplicate467,GM19035_XY_AFR_LWK_duplicate20261	chr22	42127447	42127634	ENSG00000100197.23	CYP2D6	7	2	0	0	0	0	1	1
chr22	42123231	42135383	-12152	DEL	2	GM18861_XX_AFR_YRI_duplicate467,GM19035_XY_AFR_LWK_duplicate20261	chr22	42127842	42127983	ENSG00000100197.23	CYP2D6	6	2	0	0	0	0	1	1
chr22	42123231	42135383	-12152	DEL	2	GM18861_XX_AFR_YRI_duplicate467,GM19035_XY_AFR_LWK_duplicate20261	chr22	42128174	42128350	ENSG00000100197.23	CYP2D6	5	2	0	0	0	0	1	1
chr22	42123231	42135383	-12152	DEL	2	GM18861_XX_AFR_YRI_duplicate467,GM19035_XY_AFR_LWK_duplicate20261	chr22	42128784	42128944	ENSG00000100197.23	CYP2D6	4	2	0	0	0	0	1	1
chr22	42123231	42135383	-12152	DEL	2	GM18861_XX_AFR_YRI_duplicate467,GM19035_XY_AFR_LWK_duplicate20261	chr22	42129033	42129185	ENSG00000100197.23	CYP2D6	3	2	0	0	0	0	1	1
chr22	42123231	42135383	-12152	DEL	2	GM18861_XX_AFR_YRI_duplicate467,GM19035_XY_AFR_LWK_duplicate20261	chr22	42129738	42129909	ENSG00000100197.23	CYP2D6	2	2	0	0	0	0	1	1
chr22	42123231	42135383	-12152	DEL	2	GM18861_XX_AFR_YRI_duplicate467,GM19035_XY_AFR_LWK_duplicate20261	chr22	42130612	42130810	ENSG00000100197.23	CYP2D6	1	2	0	0	0	0	1	1
chr5	141534405	141534405	333	INS	1	HG03631_XX_SAS_PJL_duplicate5950	chr5	141534335	141534433	ENSG00000131504.18	DIAPH1	19	2	0	0	0	0	1	1
chr12	50505001	50505001	66	INS	1	HG01122_XX_AMR_CLM_duplicate11783	chr12	50504985	50505240	ENSG00000066084.13	DIP2B	1	2	0	0	0	0	1	1
chr12	123898810	123898865	-55	DEL	1	HG00121_XX_EUR_GBR_duplicate11962	chr12	123898653	123898814	ENSG00000197653.16	DNAH10	56	1	0	0	0	0	1	0
chr7	21901254	21901254	72	INS	1	GM19041_XY_AFR_LWK_duplicate8835	chr7	21901007	21901839	ENSG00000105877.19	DNAH11	82	1	0	0	0	0	1	0
chr20	63932794	63932848	-54	DEL	2	GM19041_XY_AFR_LWK_duplicate19715,HG03279_XX_AFR_ESN_duplicate19084	chr20	63931465	63936011	ENSG00000101152.12	DNAJC5	5	0	0	0	0	1	1	0
chr21	33577602	33577653	-51	DEL	26	GM18856_XY_AFR_YRI_duplicate19989,GM18861_XX_AFR_YRI_duplicate20204,GM18876_XX_AFR_YRI_duplicate19918,GM19035_XY_AFR_LWK_duplicate19808,GM19308_XY_AFR_LWK_duplicate20035,GM19312_XY_AFR_LWK_duplicate19866,GM19462_XX_AFR_LWK_duplicate20126,GM19471_XX_AFR_LWK_duplicate20267,GM19473_XX_AFR_LWK_duplicate20063,HG00631_XY_EAS_CHS_duplicate16685,HG01122_XX_AMR_CLM_duplicate16834,HG01281_XX_AMR_CLM_duplic…	chr21	33577551	33578444	ENSG00000159147.18	DONSON	10	0	0	0	0	1	1	0
chr11	640003	640099	-96	DEL	21	GM18871_XY_AFR_YRI_duplicate12619,GM19035_XY_AFR_LWK_duplicate12584,HG00110_XX_EUR_GBR_duplicate10604,HG00410_XX_EAS_CHS_duplicate10899,HG00599_XX_EAS_CHS_duplicate10679,HG00631_XY_EAS_CHS_duplicate10610,HG00675_XX_EAS_CHS_duplicate10658,HG00706_XY_EAS_CHS_duplicate10700,HG01046_XX_EAS_CDX_duplicate10637,HG01812_XX_EAS_CDX_duplicate10434,HG01862_XX_EAS_KHV_duplicate10849,HG02409_XY_EAS_CDX_duplic…	chr11	639648	640306	ENSG00000069696.7	DRD4	3	0	0	0	0	1	1	0
chr11	640003	640003	143	INS	30	GM18519_XY_AFR_YRI_duplicate12762,GM18856_XY_AFR_YRI_duplicate12559,GM18861_XX_AFR_YRI_duplicate12753,GM19471_XX_AFR_LWK_duplicate12720,GM19473_XX_AFR_LWK_duplicate12635,HG01122_XX_AMR_CLM_duplicate10683,HG01363_XX_AMR_CLM_duplicate11287,HG01369_XX_AMR_CLM_duplicate11219,HG01372_XX_AMR_CLM_duplicate10924,HG01414_XX_AMR_PUR_duplicate11231,HG01501_XX_EUR_IBS_duplicate10349,HG01695_XX_EUR_IBS_duplic…	chr11	639648	640306	ENSG00000069696.7	DRD4	3	1	2	3	0	2	7	1
chr4	87616280	87616406	-126	DEL	1	HG01615_XY_EUR_IBS_duplicate4571	chr4	87613785	87616873	ENSG00000152591.15	DSPP	5	7	3	15	7	14	33	13
chr4	87615782	87615782	189	INS	2	HG02345_XX_AMR_PEL_duplicate4725,HG04216_XX_SAS_ITU_duplicate4798	chr4	87613785	87616873	ENSG00000152591.15	DSPP	5	31	14	19	11	22	68	29
chr4	87615899	87616052	-153	DEL	91	GM18519_XY_AFR_YRI_duplicate5434,GM18856_XY_AFR_YRI_duplicate5345,GM18861_XX_AFR_YRI_duplicate5451,GM18864_XX_AFR_YRI_duplicate5314,GM18876_XX_AFR_YRI_duplicate5389,GM18924_XX_AFR_YRI_duplicate5454,GM19035_XY_AFR_LWK_duplicate5453,GM19041_XY_AFR_LWK_duplicate5476,GM19312_XY_AFR_LWK_duplicate5400,GM19462_XX_AFR_LWK_duplicate5396,GM19471_XX_AFR_LWK_duplicate5376,GM19473_XX_AFR_LWK_duplicate5428,HG0…	chr4	87613785	87616873	ENSG00000152591.15	DSPP	5	32	4	8	6	15	45	20
chr16	23521764	23521764	316	INS	3	HG01372_XX_AMR_CLM_duplicate14356,HG02102_XX_AMR_PEL_duplicate13938,HG02252_XX_AMR_PEL_duplicate14005	chr16	23520754	23524454	ENSG00000103356.18	EARS2	9	31	2	8	4	11	38	18
chr16	23520701	23520775	-74	DEL	1	HG03168_XX_AFR_ESN_duplicate16448	chr16	23520754	23524454	ENSG00000103356.18	EARS2	9	13	8	8	5	13	32	15
chr7	55210476	55210476	240	INS	2	HG01046_XX_EAS_CDX_duplicate7440,HG02396_XY_EAS_CDX_duplicate7392	chr7	55205256	55211628	ENSG00000146648.21	EGFR	28	1	0	0	0	0	1	0
chr17	80146992	80147088	-96	DEL	12	GM18865_XY_AFR_YRI_duplicate17806,GM18924_XX_AFR_YRI_duplicate17523,GM19041_XY_AFR_LWK_duplicate17646,HG02282_XX_AFR_ACB_duplicate16747,HG02817_XX_AFR_GWD_duplicate17311,HG03069_XY_AFR_MSL_duplicate17790,HG03121_XX_AFR_ESN_duplicate17946,HG03279_XX_AFR_ESN_duplicate17171,HG03563_XX_AFR_MSL_duplicate17993,HG03571_XY_AFR_MSL_duplicate17249,HG03731_XX_SAS_ITU_duplicate15470,HG03774_XX_SAS_ITU_duplic…	chr17	80146793	80147128	ENSG00000141543.12	EIF4A3	1	0	0	1	0	0	1	0
chr17	80147047	80147047	62	INS	23	GM18865_XY_AFR_YRI_duplicate17807,GM19041_XY_AFR_LWK_duplicate17647,GM19473_XX_AFR_LWK_duplicate17670,HG00105_XY_EUR_GBR_duplicate15228,HG00473_XX_EAS_CHS_duplicate15272,HG00599_XX_EAS_CHS_duplicate15000,HG00675_XX_EAS_CHS_duplicate14858,HG00705_XX_EAS_CHS_duplicate15129,HG01281_XX_AMR_CLM_duplicate14938,HG01363_XX_AMR_CLM_duplicate15921,HG01372_XX_AMR_CLM_duplicate15270,HG01790_XX_EUR_GBR_duplic…	chr17	80146793	80147128	ENSG00000141543.12	EIF4A3	1	2	0	0	0	0	1	1
chr8	27804983	27805313	-330	DEL	43	GM18856_XY_AFR_YRI_duplicate10001,GM18861_XX_AFR_YRI_duplicate10170,GM18864_XX_AFR_YRI_duplicate9876,GM18876_XX_AFR_YRI_duplicate9995,GM19308_XY_AFR_LWK_duplicate10080,GM19462_XX_AFR_LWK_duplicate10034,HG00473_XX_EAS_CHS_duplicate8581,HG00599_XX_EAS_CHS_duplicate8470,HG00631_XY_EAS_CHS_duplicate8484,HG00675_XX_EAS_CHS_duplicate8501,HG00705_XX_EAS_CHS_duplicate8622,HG00728_XY_EAS_CHS_duplicate8438…	chr8	27803306	27805316	ENSG00000171320.15	ESCO2	11	13	0	0	0	0	9	4
chr4	5811777	5811835	-58	DEL	20	GM18871_XY_AFR_YRI_duplicate4864,GM19035_XY_AFR_LWK_duplicate4957,GM19471_XX_AFR_LWK_duplicate4856,HG00110_XX_EUR_GBR_duplicate4283,HG00136_XY_EUR_GBR_duplicate4222,HG00151_XY_EUR_GBR_duplicate4157,HG00331_XX_EUR_FIN_duplicate4404,HG01122_XX_AMR_CLM_duplicate4441,HG01414_XX_AMR_PUR_duplicate4434,HG01501_XX_EUR_IBS_duplicate4256,HG01695_XX_EUR_IBS_duplicate4395,HG01801_XX_EAS_CDX_duplicate4239,HG0…	chr4	5810953	5814305	ENSG00000072840.13	EVC	21	12	6	1	4	3	19	7
chr10	73244314	73244314	88	INS	2	HG03022_XX_SAS_PJL_duplicate10216,HG03861_XX_SAS_ITU_duplicate10477	chr10	73240946	73244504	ENSG00000138286.15	FAM149B1	14	5	3	3	3	4	11	7
chr13	77006553	77006629	-76	DEL	1	HG00151_XY_EUR_GBR_duplicate12764	chr13	77005260	77007788	ENSG00000005812.11	FBXL3	5	15	0	0	4	1	11	9
chr4	154585439	154585439	322	INS	3	GM19308_XY_AFR_LWK_duplicate5761,HG03121_XX_AFR_ESN_duplicate5904,GM18501_XY_AFR_YRI_duplicate5817	chr4	154585275	154586918	ENSG00000171560.18	FGA	5	33	14	20	11	21	70	29
chrX	138625458	138625458	54	INS	4	HG00599_XX_EAS_CHS_duplicate18020,HG02312_XX_AMR_PEL_duplicate18228,HG02389_XY_EAS_CDX_duplicate17994,HG02979_XX_AFR_ESN_duplicate21411	chrX	138614727	138632986	ENSG00000129682.16	FGF13	5	27	11	19	9	12	55	23
chr5	177098012	177102222	-4210	DEL	1	GM18871_XY_AFR_YRI_duplicate7031	chr5	177097527	177098144	ENSG00000160867.15	FGFR4	18	3	0	0	0	0	2	1
chr7	30011535	30011595	-60	DEL	1	HG03571_XY_AFR_MSL_duplicate8703	chr7	30010587	30014893	ENSG00000106080.11	FKBP14	4	0	0	0	1	0	0	1
chr1	152305167	152305167	972	INS	1	GM19041_XY_AFR_LWK_duplicate1462	chr1	152302165	152314747	ENSG00000143631.11	FLG	3	0	0	1	0	0	1	0
chr1	152307223	152307223	972	INS	2	GM19041_XY_AFR_LWK_duplicate1463,GM19471_XX_AFR_LWK_duplicate1386	chr1	152302165	152314747	ENSG00000143631.11	FLG	3	2	0	0	0	0	1	1
chr1	152312420	152313395	-975	DEL	1	HG02502_XX_AFR_ACB_duplicate1922	chr1	152302165	152314747	ENSG00000143631.11	FLG	3	8	0	0	0	0	5	3
chr1	152306299	152307271	-972	DEL	4	GM19035_XY_AFR_LWK_duplicate1586,HG02051_XY_AFR_ACB_duplicate1829,HG02502_XX_AFR_ACB_duplicate1921,HG03120_XY_AFR_ESN_duplicate1858	chr1	152302165	152314747	ENSG00000143631.11	FLG	3	8	2	7	4	1	12	10
chr1	152304195	152304195	975	INS	40	GM19041_XY_AFR_LWK_duplicate1461,HG00410_XX_EAS_CHS_duplicate1336,HG00473_XX_EAS_CHS_duplicate1223,HG00525_XX_EAS_CHS_duplicate1399,HG00599_XX_EAS_CHS_duplicate1265,HG00631_XY_EAS_CHS_duplicate1545,HG00675_XX_EAS_CHS_duplicate1490,HG00705_XX_EAS_CHS_duplicate1351,HG00706_XY_EAS_CHS_duplicate1376,HG01046_XX_EAS_CDX_duplicate1166,HG01372_XX_AMR_CLM_duplicate1455,HG01414_XX_AMR_PUR_duplicate1386,HG0…	chr1	152302165	152314747	ENSG00000143631.11	FLG	3	0	0	0	0	1	1	0
chr1	152305958	152305958	972	INS	24	HG00331_XX_EUR_FIN_duplicate1498,HG00473_XX_EAS_CHS_duplicate1224,HG00525_XX_EAS_CHS_duplicate1400,HG00599_XX_EAS_CHS_duplicate1266,HG00706_XY_EAS_CHS_duplicate1377,HG01046_XX_EAS_CDX_duplicate1167,HG01122_XX_AMR_CLM_duplicate1576,HG01281_XX_AMR_CLM_duplicate1474,HG01312_XX_AMR_PUR_duplicate1455,HG01372_XX_AMR_CLM_duplicate1456,HG01797_XX_EAS_CDX_duplicate1482,HG01862_XX_EAS_KHV_duplicate1213,HG0…	chr1	152302165	152314747	ENSG00000143631.11	FLG	3	1	0	0	0	0	0	1
chr1	152351624	152351849	-225	DEL	6	GM18519_XY_AFR_YRI_duplicate1442,GM19035_XY_AFR_LWK_duplicate1587,GM19041_XY_AFR_LWK_duplicate1464,GM19312_XY_AFR_LWK_duplicate1413,GM19462_XX_AFR_LWK_duplicate1410,HG02614_XX_AFR_GWD_duplicate1692	chr1	152348735	152357647	ENSG00000143520.6	FLG2	3	13	4	0	3	0	13	7
chr1	152354960	152355191	-231	DEL	34	HG00410_XX_EAS_CHS_duplicate1337,HG00473_XX_EAS_CHS_duplicate1225,HG00525_XX_EAS_CHS_duplicate1401,HG00631_XY_EAS_CHS_duplicate1546,HG00675_XX_EAS_CHS_duplicate1491,HG00706_XY_EAS_CHS_duplicate1378,HG00728_XY_EAS_CHS_duplicate1750,HG01046_XX_EAS_CDX_duplicate1168,HG01281_XX_AMR_CLM_duplicate1475,HG01372_XX_AMR_CLM_duplicate1457,HG01414_XX_AMR_PUR_duplicate1387,HG01797_XX_EAS_CDX_duplicate1483,HG0…	chr1	152348735	152357647	ENSG00000143520.6	FLG2	3	6	0	0	0	0	4	2
chr11	128812821	128813514	-693	DEL	35	GM18856_XY_AFR_YRI_duplicate13406,GM18871_XY_AFR_YRI_duplicate13469,GM19471_XX_AFR_LWK_duplicate13560,HG00110_XX_EUR_GBR_duplicate11304,HG00127_XX_EUR_GBR_duplicate10612,HG00136_XY_EUR_GBR_duplicate11452,HG00151_XY_EUR_GBR_duplicate11504,HG00331_XX_EUR_FIN_duplicate11553,HG00473_XX_EAS_CHS_duplicate11552,HG00599_XX_EAS_CHS_duplicate11429,HG00728_XY_EAS_CHS_duplicate11107,HG01122_XX_AMR_CLM_duplic…	chr11	128810459	128813267	ENSG00000151702.18	FLI1	9	0	0	1	0	0	1	0
chr1	240207557	240207623	-66	DEL	1	HG00525_XX_EAS_CHS_duplicate1839	chr1	240206799	240208732	ENSG00000155816.21	FMN2	5	0	0	1	0	0	1	0
chr1	240208172	240208172	132	INS	6	GM18861_XX_AFR_YRI_duplicate1911,GM18865_XY_AFR_YRI_duplicate1968,GM19041_XY_AFR_LWK_duplicate1972,GM19312_XY_AFR_LWK_duplicate1922,HG02048_XX_EAS_KHV_duplicate1688,HG02817_XX_AFR_GWD_duplicate2251	chr1	240206799	240208732	ENSG00000155816.21	FMN2	5	0	1	0	0	0	1	0
chr1	240207698	240207698	264	INS	2	HG02979_XX_AFR_ESN_duplicate2060,HG03121_XX_AFR_ESN_duplicate2048	chr1	240206799	240208732	ENSG00000155816.21	FMN2	5	0	1	0	0	0	1	0
chr1	240207755	240207821	-66	DEL	2	GM18924_XX_AFR_YRI_duplicate2048,HG03168_XX_AFR_ESN_duplicate2174	chr1	240206799	240208732	ENSG00000155816.21	FMN2	5	0	1	0	0	0	1	0
chr1	240207632	240207632	132	INS	3	GM18924_XX_AFR_YRI_duplicate2047,HG02694_XX_SAS_PJL_duplicate109,HG03770_XX_SAS_ITU_duplicate125	chr1	240206799	240208732	ENSG00000155816.21	FMN2	5	0	1	0	0	0	1	0
chr1	240207803	240207803	364	INS	1	HG03868_XX_SAS_ITU_duplicate111	chr1	240206799	240208732	ENSG00000155816.21	FMN2	5	0	1	0	0	0	1	0
chr1	240207923	240207923	133	INS	6	HG01468_XX_AMR_CLM_duplicate160,HG02252_XX_AMR_PEL_duplicate1923,HG02409_XY_EAS_CDX_duplicate1709,HG02817_XX_AFR_GWD_duplicate2250,HG03744_XY_SAS_STU_duplicate100,HG03971_XY_SAS_ITU_duplicate1908	chr1	240206799	240208732	ENSG00000155816.21	FMN2	5	0	1	0	0	0	1	0
chr1	240207734	240207734	132	INS	27	GM18856_XY_AFR_YRI_duplicate98,GM18861_XX_AFR_YRI_duplicate2,GM18864_XX_AFR_YRI_duplicate1889,GM18871_XY_AFR_YRI_duplicate1919,GM19041_XY_AFR_LWK_duplicate114,GM19462_XX_AFR_LWK_duplicate1899,GM19473_XX_AFR_LWK_duplicate1892,HG00136_XY_EUR_GBR_duplicate1754,HG00410_XX_EAS_CHS_duplicate1776,HG00599_XX_EAS_CHS_duplicate1707,HG01312_XX_AMR_PUR_duplicate1894,HG01369_XX_AMR_CLM_duplicate1700,HG01372_X…	chr1	240206799	240208732	ENSG00000155816.21	FMN2	5	0	1	0	0	0	1	0
chrX	147912072	147912072	78	INS	8	GM19312_XY_AFR_LWK_duplicate21058,HG00331_XX_EUR_FIN_duplicate18117,HG01122_XX_AMR_CLM_duplicate17922,HG01312_XX_AMR_PUR_duplicate18831,HG01615_XY_EUR_IBS_duplicate18016,HG02979_XX_AFR_ESN_duplicate21475,HG03971_XY_SAS_ITU_duplicate18506,HG04216_XX_SAS_ITU_duplicate18428	chrX	147911919	147912230	ENSG00000102081.16	FMR1	1	0	1	0	0	0	1	0
chr10	93702522	93702522	93	INS	5	GM19041_XY_AFR_LWK_duplicate12383,HG03770_XX_SAS_ITU_duplicate10425,HG03861_XX_SAS_ITU_duplicate10562,HG03898_XX_SAS_STU_duplicate10425,HG04063_XX_SAS_ITU_duplicate10409	chr10	93702375	93702592	ENSG00000148690.12	FRA10AC1	1	0	0	1	0	0	1	0
chr2	49019888	49021886	-1998	DEL	1	HG00675_XX_EAS_CHS_duplicate2339	chr2	49020086	49020160	ENSG00000170820.12	FSHR	3	0	1	0	0	0	1	0
chr16	54112541	54112541	336	INS	1	HG00675_XX_EAS_CHS_duplicate14043	chr16	54111762	54121941	ENSG00000140718.22	FTO	9	0	1	0	0	0	1	0
chr19	48697403	48707480	-10077	DEL	5	HG03643_XX_SAS_STU_duplicate15984,HG03744_XY_SAS_STU_duplicate16238,HG03898_XX_SAS_STU_duplicate16004,HG03919_XX_SAS_BEB_duplicate16088,HG04054_XX_SAS_ITU_duplicate16040	chr19	48702955	48705951	ENSG00000176920.14	FUT2	2	3	0	0	0	0	1	2
chr20	62463817	62463817	60	INS	8	GM18856_XY_AFR_YRI_duplicate19690,GM18861_XX_AFR_YRI_duplicate19911,HG02051_XY_AFR_ACB_duplicate19084,HG02282_XX_AFR_ACB_duplicate18617,HG02979_XX_AFR_ESN_duplicate19784,HG03069_XY_AFR_MSL_duplicate19838,HG03168_XX_AFR_ESN_duplicate19476,HG03499_XX_AFR_ESN_duplicate19492	chr20	62463497	62464991	ENSG00000130700.7	GATA5	7	0	0	1	0	0	0	1
chr1	155235749	155235804	-55	DEL	2	GM18864_XX_AFR_YRI_duplicate109,HG03563_XX_AFR_MSL_duplicate1483	chr1	155235681	155235844	ENSG00000177628.16	GBA1	9	0	0	1	0	0	0	1
chr10	116064037	116064037	63	INS	1	HG00110_XX_EUR_GBR_duplicate10362	chr10	116056925	116064544	ENSG00000151892.16	GFRA1	11	0	0	1	0	0	0	1
chr2	85545712	85545712	333	INS	6	GM18856_XY_AFR_YRI_duplicate2629,GM18861_XX_AFR_YRI_duplicate2650,GM18864_XX_AFR_YRI_duplicate2575,GM19308_XY_AFR_LWK_duplicate2634,GM19462_XX_AFR_LWK_duplicate2662,GM19473_XX_AFR_LWK_duplicate2656	chr2	85544720	85550126	ENSG00000115486.13	GGCX	15	0	0	1	0	0	0	1
chr1	235340661	235343476	-2815	DEL	1	HG01363_XX_AMR_CLM_duplicate1664	chr1	235341708	235341778	ENSG00000152904.11	GGPS1	3	0	0	1	0	0	0	1
chr1	235340661	235343476	-2815	DEL	1	HG01363_XX_AMR_CLM_duplicate1664	chr1	235342011	235344532	ENSG00000152904.11	GGPS1	4	0	0	1	0	0	0	1
chr5	42719833	42719833	331	INS	19	HG00410_XX_EAS_CHS_duplicate5557,HG00473_XX_EAS_CHS_duplicate5519,HG00675_XX_EAS_CHS_duplicate5572,HG00705_XX_EAS_CHS_duplicate5600,HG01046_XX_EAS_CDX_duplicate5337,HG01797_XX_EAS_CDX_duplicate5517,HG01801_XX_EAS_CDX_duplicate5441,HG01812_XX_EAS_CDX_duplicate5546,HG02048_XX_EAS_KHV_duplicate5530,HG02345_XX_AMR_PEL_duplicate5627,HG02396_XY_EAS_CDX_duplicate5290,HG02409_XY_EAS_CDX_duplicate5516,HG0…	chr5	42718453	42721878	ENSG00000112964.14	GHR	10	0	0	1	0	0	0	1
chr5	42628209	42630888	-2679	DEL	53	GM18519_XY_AFR_YRI_duplicate6451,GM18856_XY_AFR_YRI_duplicate6332,GM18864_XX_AFR_YRI_duplicate6323,GM18865_XY_AFR_YRI_duplicate6539,GM18871_XY_AFR_YRI_duplicate6365,GM18876_XX_AFR_YRI_duplicate6375,GM19041_XY_AFR_LWK_duplicate6507,GM19462_XX_AFR_LWK_duplicate6364,GM19471_XX_AFR_LWK_duplicate6377,GM19473_XX_AFR_LWK_duplicate6378,HG00105_XY_EUR_GBR_duplicate5561,HG00110_XX_EUR_GBR_duplicate5503,HG0…	chr5	42629038	42629103	ENSG00000112964.14	GHR	3	0	0	1	0	0	0	1
chr20	25446388	25446388	316	INS	1	GM18501_XY_AFR_YRI_duplicate19519	chr20	25445923	25448563	ENSG00000101003.12	GINS1	7	0	0	1	0	0	0	1
chr19	14496074	14496074	165	INS	1	HG03548_XX_AFR_MSL_duplicate18125	chr19	14496037	14496127	ENSG00000123159.16	GIPC1	1	8	0	0	0	0	7	1
chr19	14496041	14496041	57	INS	2	HG02048_XX_EAS_KHV_duplicate15877,HG03563_XX_AFR_MSL_duplicate18947	chr19	14496037	14496127	ENSG00000123159.16	GIPC1	1	4	0	0	0	0	3	1
chr19	3590457	3590547	-90	DEL	1	HG01372_XX_AMR_CLM_duplicate15984	chr19	3590039	3593541	ENSG00000179855.9	GIPC3	6	6	0	0	1	0	5	2
chr19	3590802	3590874	-72	DEL	2	HG01363_XX_AMR_CLM_duplicate16603,HG01372_XX_AMR_CLM_duplicate15985	chr19	3590039	3593541	ENSG00000179855.9	GIPC3	6	0	0	1	0	1	0	2
chr19	3590707	3590707	144	INS	3	HG02614_XX_AFR_GWD_duplicate18116,HG02817_XX_AFR_GWD_duplicate18127,HG03571_XY_AFR_MSL_duplicate18051	chr19	3590039	3593541	ENSG00000179855.9	GIPC3	6	0	0	0	0	1	1	0
chr19	3590599	3590707	-108	DEL	6	GM18861_XX_AFR_YRI_duplicate18735,GM18871_XY_AFR_YRI_duplicate18464,GM19035_XY_AFR_LWK_duplicate18354,GM19471_XX_AFR_LWK_duplicate18728,HG02731_XX_SAS_PJL_duplicate16150,GM18501_XY_AFR_YRI_duplicate18654	chr19	3590039	3593541	ENSG00000179855.9	GIPC3	6	1	0	0	2	2	2	3
chr19	3094529	3094587	-58	DEL	2	GM19035_XY_AFR_LWK_duplicate18347,GM19041_XY_AFR_LWK_duplicate18417	chr19	3094362	3094787	ENSG00000088256.9	GNA11	1	1	0	0	0	0	0	1
chr15	52119408	52119408	54	INS	3	GM19312_XY_AFR_LWK_duplicate15895,HG00675_XX_EAS_CHS_duplicate13463,HG03168_XX_AFR_ESN_duplicate15866	chr15	52115100	52122768	ENSG00000069966.19	GNB5	13	1	0	0	0	0	0	1
chr15	52117102	52117102	67	INS	10	HG00473_XX_EAS_CHS_duplicate13802,HG00705_XX_EAS_CHS_duplicate13690,HG00706_XY_EAS_CHS_duplicate13547,HG01122_XX_AMR_CLM_duplicate13589,HG01790_XX_EUR_GBR_duplicate13811,HG01801_XX_EAS_CDX_duplicate13329,HG02185_XX_EAS_CDX_duplicate13537,HG02694_XX_SAS_PJL_duplicate13595,HG03668_XX_SAS_PJL_duplicate13704,HG03770_XX_SAS_ITU_duplicate13709	chr15	52115100	52122768	ENSG00000069966.19	GNB5	13	1	0	0	0	0	0	1
chr17	4933822	4933900	-78	DEL	26	GM19041_XY_AFR_LWK_duplicate17131,GM19312_XY_AFR_LWK_duplicate17112,HG00410_XX_EAS_CHS_duplicate14852,HG00525_XX_EAS_CHS_duplicate14514,HG00705_XX_EAS_CHS_duplicate14708,HG00706_XY_EAS_CHS_duplicate14525,HG00728_XY_EAS_CHS_duplicate14114,HG01122_XX_AMR_CLM_duplicate14533,HG01468_XX_AMR_CLM_duplicate13979,HG01615_XY_EUR_IBS_duplicate14637,HG01812_XX_EAS_CDX_duplicate14071,HG01862_XX_EAS_KHV_duplic…	chr17	4932599	4935023	ENSG00000185245.9	GP1BA	2	1	0	0	0	0	0	1
chr1	108933209	108933209	146	INS	4	GM19462_XX_AFR_LWK_duplicate1310,HG00136_XY_EUR_GBR_duplicate1218,HG01122_XX_AMR_CLM_duplicate1476,HG02051_XY_AFR_ACB_duplicate1726	chr1	108929701	108934545	ENSG00000121957.15	GPSM2	15	1	0	0	0	0	1	0
chr13	113737473	113737473	829	INS	5	GM18861_XX_AFR_YRI_duplicate15422,GM18871_XY_AFR_YRI_duplicate15182,GM18876_XX_AFR_YRI_duplicate376,GM19308_XY_AFR_LWK_duplicate15347,HG03121_XX_AFR_ESN_duplicate15389	chr13	113735068	113737736	ENSG00000185974.7	GRK1	7	1	0	0	0	0	1	0
chr13	113737473	113737473	414	INS	13	GM18519_XY_AFR_YRI_duplicate15308,GM18865_XY_AFR_YRI_duplicate15314,GM18924_XX_AFR_YRI_duplicate15081,GM19035_XY_AFR_LWK_duplicate15166,GM19312_XY_AFR_LWK_duplicate15081,GM19462_XX_AFR_LWK_duplicate15318,GM19471_XX_AFR_LWK_duplicate15344,HG02282_XX_AFR_ACB_duplicate14529,HG02502_XX_AFR_ACB_duplicate14776,HG03120_XY_AFR_ESN_duplicate15088,HG03168_XX_AFR_ESN_duplicate15079,HG03499_XX_AFR_ESN_duplic…	chr13	113735068	113737736	ENSG00000185974.7	GRK1	7	1	0	0	0	0	0	1
chr13	113737428	113737428	138	INS	13	GM18856_XY_AFR_YRI_duplicate15216,GM18861_XX_AFR_YRI_duplicate15423,GM18864_XX_AFR_YRI_duplicate15029,HG00331_XX_EUR_FIN_duplicate13072,HG01046_XX_EAS_CDX_duplicate12917,HG01312_XX_AMR_PUR_duplicate13546,HG01363_XX_AMR_CLM_duplicate13702,HG01395_XY_AMR_PUR_duplicate13261,HG01695_XX_EUR_IBS_duplicate12972,HG02051_XY_AFR_ACB_duplicate14849,HG03499_XX_AFR_ESN_duplicate15102,HG03548_XX_AFR_MSL_duplic…	chr13	113735068	113737736	ENSG00000185974.7	GRK1	7	2	0	0	0	0	0	2
chr13	113737293	113737385	-92	DEL	9	HG00136_XY_EUR_GBR_duplicate12937,HG01812_XX_EAS_CDX_duplicate12481,HG03631_XX_SAS_PJL_duplicate13138,HG03717_XX_SAS_ITU_duplicate12893,HG03861_XX_SAS_ITU_duplicate13184,HG03864_XY_SAS_ITU_duplicate12936,HG04054_XX_SAS_ITU_duplicate12957,HG04063_XX_SAS_ITU_duplicate13018,HG04216_XX_SAS_ITU_duplicate13265	chr13	113735068	113737736	ENSG00000185974.7	GRK1	7	1	0	0	0	0	0	1
chr6	158199201	158199201	331	INS	2	HG03279_XX_AFR_ESN_duplicate8104,GM18501_XY_AFR_YRI_duplicate8238	chr6	158191977	158199344	ENSG00000272047.4	GTF2H5	3	1	0	0	0	0	0	1
chr19	17342706	17342706	340	INS	1	HG00706_XY_EAS_CHS_duplicate15778	chr19	17341478	17342731	ENSG00000130299.17	GTPBP3	9	0	0	0	1	0	1	0
chr2	126691222	126694807	-3585	DEL	1	HG02252_XX_AMR_PEL_duplicate2676	chr2	126693864	126693947	ENSG00000136732.16	GYPC	3	0	0	1	0	0	0	1
chr16	165396	184700	-19304	DEL	2	HG00728_XY_EAS_CHS_duplicate13491,HG01812_XX_EAS_CDX_duplicate758	chr16	176680	176811	ENSG00000206172.8	HBA1	1	0	1	0	0	0	1	0
chr16	165396	184700	-19304	DEL	2	HG00728_XY_EAS_CHS_duplicate13491,HG01812_XX_EAS_CDX_duplicate758	chr16	176929	177133	ENSG00000206172.8	HBA1	2	0	1	0	0	0	1	0
chr16	165396	184700	-19304	DEL	2	HG00728_XY_EAS_CHS_duplicate13491,HG01812_XX_EAS_CDX_duplicate758	chr16	177283	177522	ENSG00000206172.8	HBA1	3	0	2	0	0	0	2	0
chr16	165396	184700	-19304	DEL	2	HG00728_XY_EAS_CHS_duplicate13491,HG01812_XX_EAS_CDX_duplicate758	chr16	172876	173007	ENSG00000188536.13	HBA2	1	0	1	0	0	0	1	0
chr16	165396	184700	-19304	DEL	2	HG00728_XY_EAS_CHS_duplicate13491,HG01812_XX_EAS_CDX_duplicate758	chr16	173125	173329	ENSG00000188536.13	HBA2	2	1	0	0	0	0	0	1
chr16	165396	184700	-19304	DEL	2	HG00728_XY_EAS_CHS_duplicate13491,HG01812_XX_EAS_CDX_duplicate758	chr16	173472	173710	ENSG00000188536.13	HBA2	3	5	0	0	0	0	5	0
chr16	169498	173755	-4257	DEL	3	HG00675_XX_EAS_CHS_duplicate13768,HG03643_XX_SAS_STU_duplicate13955,HG03770_XX_SAS_ITU_duplicate14024	chr16	172876	173007	ENSG00000188536.13	HBA2	1	1	0	0	0	0	1	0
chr16	169498	173755	-4257	DEL	3	HG00675_XX_EAS_CHS_duplicate13768,HG03643_XX_SAS_STU_duplicate13955,HG03770_XX_SAS_ITU_duplicate14024	chr16	173125	173329	ENSG00000188536.13	HBA2	2	1	0	1	0	0	2	0
chr16	169498	173755	-4257	DEL	3	HG00675_XX_EAS_CHS_duplicate13768,HG03643_XX_SAS_STU_duplicate13955,HG03770_XX_SAS_ITU_duplicate14024	chr16	173472	173710	ENSG00000188536.13	HBA2	3	3	0	0	0	0	2	1
chr16	172565	176346	-3781	DEL	17	GM18861_XX_AFR_YRI_duplicate16605,GM18864_XX_AFR_YRI_duplicate16102,GM18865_XY_AFR_YRI_duplicate16462,GM18871_XY_AFR_YRI_duplicate16371,GM19035_XY_AFR_LWK_duplicate16320,GM19312_XY_AFR_LWK_duplicate16246,GM19471_XX_AFR_LWK_duplicate16504,GM19473_XX_AFR_LWK_duplicate16365,HG00599_XX_EAS_CHS_duplicate13921,HG01363_XX_AMR_CLM_duplicate14719,HG02373_XY_EAS_CDX_duplicate13922,HG02409_XY_EAS_CDX_duplic…	chr16	172876	173007	ENSG00000188536.13	HBA2	1	0	0	0	1	1	2	0
chr16	172565	176346	-3781	DEL	17	GM18861_XX_AFR_YRI_duplicate16605,GM18864_XX_AFR_YRI_duplicate16102,GM18865_XY_AFR_YRI_duplicate16462,GM18871_XY_AFR_YRI_duplicate16371,GM19035_XY_AFR_LWK_duplicate16320,GM19312_XY_AFR_LWK_duplicate16246,GM19471_XX_AFR_LWK_duplicate16504,GM19473_XX_AFR_LWK_duplicate16365,HG00599_XX_EAS_CHS_duplicate13921,HG01363_XX_AMR_CLM_duplicate14719,HG02373_XY_EAS_CDX_duplicate13922,HG02409_XY_EAS_CDX_duplic…	chr16	173125	173329	ENSG00000188536.13	HBA2	2	0	1	0	0	1	1	1
chr16	172565	176346	-3781	DEL	17	GM18861_XX_AFR_YRI_duplicate16605,GM18864_XX_AFR_YRI_duplicate16102,GM18865_XY_AFR_YRI_duplicate16462,GM18871_XY_AFR_YRI_duplicate16371,GM19035_XY_AFR_LWK_duplicate16320,GM19312_XY_AFR_LWK_duplicate16246,GM19471_XX_AFR_LWK_duplicate16504,GM19473_XX_AFR_LWK_duplicate16365,HG00599_XX_EAS_CHS_duplicate13921,HG01363_XX_AMR_CLM_duplicate14719,HG02373_XY_EAS_CDX_duplicate13922,HG02409_XY_EAS_CDX_duplic…	chr16	173472	173710	ENSG00000188536.13	HBA2	3	0	0	0	0	5	4	1
chr11	5226630	5249421	-22791	DEL	1	GM19035_XY_AFR_LWK_duplicate12675	chr11	5226577	5226799	ENSG00000244734.4	HBB	2	11	13	20	11	21	55	21
chr11	5226630	5249421	-22791	DEL	1	GM19035_XY_AFR_LWK_duplicate12675	chr11	5226930	5227071	ENSG00000244734.4	HBB	1	14	9	2	7	10	30	12
chr11	5226630	5249421	-22791	DEL	1	GM19035_XY_AFR_LWK_duplicate12675	chr11	5232838	5233092	ENSG00000223609.11	HBD	3	5	0	0	0	1	3	3
chr11	5226630	5249421	-22791	DEL	1	GM19035_XY_AFR_LWK_duplicate12675	chr11	5233991	5234213	ENSG00000223609.11	HBD	2	10	0	0	0	5	8	7
chr11	5226630	5249421	-22791	DEL	1	GM19035_XY_AFR_LWK_duplicate12675	chr11	5234342	5234483	ENSG00000223609.11	HBD	1	8	5	3	5	6	20	7
chr11	5226630	5249421	-22791	DEL	1	GM19035_XY_AFR_LWK_duplicate12675	chr11	5248269	5248487	ENSG00000213934.9	HBG1	3	31	12	17	11	15	62	24
chr11	5226630	5249421	-22791	DEL	1	GM19035_XY_AFR_LWK_duplicate12675	chr11	5249368	5249590	ENSG00000213934.9	HBG1	2	30	11	7	6	15	50	19
chr11	5249028	5253948	-4920	DEL	1	HG02373_XY_EAS_CDX_duplicate10752	chr11	5249368	5249590	ENSG00000213934.9	HBG1	2	11	1	0	0	0	5	7
chr11	5249028	5253948	-4920	DEL	1	HG02373_XY_EAS_CDX_duplicate10752	chr11	5249713	5249857	ENSG00000213934.9	HBG1	1	1	0	0	0	0	0	1
chr11	5249028	5253948	-4920	DEL	1	HG02373_XY_EAS_CDX_duplicate10752	chr11	5253188	5253405	ENSG00000196565.15	HBG2	3	1	0	0	0	0	1	0
chr5	45257948	45257948	295	INS	6	GM18861_XX_AFR_YRI_duplicate6501,GM18864_XX_AFR_YRI_duplicate6338,GM18865_XY_AFR_YRI_duplicate6552,GM18924_XX_AFR_YRI_duplicate6391,GM19035_XY_AFR_LWK_duplicate6453,HG03499_XX_AFR_ESN_duplicate6564	chr5	45254948	45262810	ENSG00000164588.8	HCN1	8	1	0	0	0	0	1	0
chr12	112382327	112382327	66	INS	1	HG00331_XX_EUR_FIN_duplicate12186	chr12	112381952	112382431	ENSG00000173064.14	HECTD4	1	0	0	3	1	0	4	0
chr16	72049451	72076250	-26799	DEL	1	HG00675_XX_EAS_CHS_duplicate14115	chr16	72054505	72054657	ENSG00000257017.10	HP	1	0	0	0	1	0	1	0
chr16	72049451	72076250	-26799	DEL	1	HG00675_XX_EAS_CHS_duplicate14115	chr16	72056161	72056243	ENSG00000257017.10	HP	2	0	5	6	0	0	6	5
chr16	72049451	72076250	-26799	DEL	1	HG00675_XX_EAS_CHS_duplicate14115	chr16	72056530	72056631	ENSG00000257017.10	HP	3	3	0	0	0	0	1	2
chr16	72049451	72076250	-26799	DEL	1	HG00675_XX_EAS_CHS_duplicate14115	chr16	72057392	72057466	ENSG00000257017.10	HP	4	4	0	0	0	0	2	2
chr16	72049451	72076250	-26799	DEL	1	HG00675_XX_EAS_CHS_duplicate14115	chr16	72058254	72058355	ENSG00000257017.10	HP	5	2	0	0	0	0	1	1
chr16	72049451	72076250	-26799	DEL	1	HG00675_XX_EAS_CHS_duplicate14115	chr16	72059114	72059188	ENSG00000257017.10	HP	6	1	0	0	0	0	0	1
chr16	72049451	72076250	-26799	DEL	1	HG00675_XX_EAS_CHS_duplicate14115	chr16	72060112	72061055	ENSG00000257017.10	HP	7	3	0	0	0	0	2	1
chr16	72049451	72060059	-10608	DEL	1	HG00728_XY_EAS_CHS_duplicate744	chr16	72054505	72054657	ENSG00000257017.10	HP	1	1	0	0	0	0	1	0
chr16	72049451	72060059	-10608	DEL	1	HG00728_XY_EAS_CHS_duplicate744	chr16	72056161	72056243	ENSG00000257017.10	HP	2	1	0	0	0	0	0	1
chr16	72049451	72060059	-10608	DEL	1	HG00728_XY_EAS_CHS_duplicate744	chr16	72056530	72056631	ENSG00000257017.10	HP	3	0	0	0	0	1	1	0
chr16	72049451	72060059	-10608	DEL	1	HG00728_XY_EAS_CHS_duplicate744	chr16	72057392	72057466	ENSG00000257017.10	HP	4	0	2	0	0	1	2	1
chr16	72049451	72060059	-10608	DEL	1	HG00728_XY_EAS_CHS_duplicate744	chr16	72058254	72058355	ENSG00000257017.10	HP	5	10	0	0	0	2	8	4
chr16	72049451	72060059	-10608	DEL	1	HG00728_XY_EAS_CHS_duplicate744	chr16	72059114	72059188	ENSG00000257017.10	HP	6	0	0	0	0	1	1	0
chr16	72057480	72059195	-1715	DEL	58	GM18519_XY_AFR_YRI_duplicate422,GM18856_XY_AFR_YRI_duplicate411,GM18861_XX_AFR_YRI_duplicate17074,GM18864_XX_AFR_YRI_duplicate16564,GM18871_XY_AFR_YRI_duplicate16822,GM18876_XX_AFR_YRI_duplicate16757,GM18924_XX_AFR_YRI_duplicate16668,GM19035_XY_AFR_LWK_duplicate16763,GM19041_XY_AFR_LWK_duplicate16767,GM19308_XY_AFR_LWK_duplicate16953,GM19473_XX_AFR_LWK_duplicate16798,HG00105_XY_EUR_GBR_duplicate1…	chr16	72058254	72058355	ENSG00000257017.10	HP	5	6	5	9	2	1	19	4
chr16	72057480	72059195	-1715	DEL	58	GM18519_XY_AFR_YRI_duplicate422,GM18856_XY_AFR_YRI_duplicate411,GM18861_XX_AFR_YRI_duplicate17074,GM18864_XX_AFR_YRI_duplicate16564,GM18871_XY_AFR_YRI_duplicate16822,GM18876_XX_AFR_YRI_duplicate16757,GM18924_XX_AFR_YRI_duplicate16668,GM19035_XY_AFR_LWK_duplicate16763,GM19041_XY_AFR_LWK_duplicate16767,GM19308_XY_AFR_LWK_duplicate16953,GM19473_XX_AFR_LWK_duplicate16798,HG00105_XY_EUR_GBR_duplicate1…	chr16	72059114	72059188	ENSG00000257017.10	HP	6	4	2	12	1	7	17	9
chr1	228180857	228184999	-4142	DEL	1	HG01615_XY_EUR_IBS_duplicate1584	chr1	228175122	228182257	ENSG00000181873.13	IBA57	3	1	4	10	2	8	15	10
chr11	319750	319750	68	INS	10	GM18924_XX_AFR_YRI_duplicate12395,GM19041_XY_AFR_LWK_duplicate12750,HG00525_XX_EAS_CHS_duplicate10585,HG00675_XX_EAS_CHS_duplicate10639,HG01372_XX_AMR_CLM_duplicate10901,HG01414_XX_AMR_PUR_duplicate11207,HG02312_XX_AMR_PEL_duplicate10816,HG03120_XY_AFR_ESN_duplicate12522,HG03744_XY_SAS_STU_duplicate10901,HG03774_XX_SAS_ITU_duplicate10950	chr11	319676	319990	ENSG00000142089.17	IFITM3	2	9	3	12	0	6	21	9
chr21	33355531	33355582	-51	DEL	1	GM19473_XX_AFR_LWK_duplicate20061	chr21	33355316	33359864	ENSG00000142166.15	IFNAR1	11	28	9	6	8	16	49	18
chr14	105772487	105860263	-87776	DEL	1	HG02817_XX_AFR_GWD_duplicate15446	chr14	105851705	105851974	ENSG00000211899.10	IGHM	6	4	0	5	0	0	7	2
chr14	105772487	105860263	-87776	DEL	1	HG02817_XX_AFR_GWD_duplicate15446	chr14	105852148	105852263	ENSG00000211899.10	IGHM	5	25	6	8	3	9	36	15
chr14	105772487	105860263	-87776	DEL	1	HG02817_XX_AFR_GWD_duplicate15446	chr14	105854405	105854737	ENSG00000211899.10	IGHM	4	12	1	0	0	0	8	5
chr14	105772487	105860263	-87776	DEL	1	HG02817_XX_AFR_GWD_duplicate15446	chr14	105854917	105855234	ENSG00000211899.10	IGHM	3	22	5	2	1	6	25	11
chr14	105772487	105860263	-87776	DEL	1	HG02817_XX_AFR_GWD_duplicate15446	chr14	105855480	105855815	ENSG00000211899.10	IGHM	2	3	0	0	0	0	2	1
chr14	105772487	105860263	-87776	DEL	1	HG02817_XX_AFR_GWD_duplicate15446	chr14	105855906	105856218	ENSG00000211899.10	IGHM	1	0	0	1	0	0	1	0
chr2	88832767	88859609	-26842	DEL	2	HG02373_XY_EAS_CDX_duplicate2335,HG03864_XY_SAS_ITU_duplicate2544	chr2	88857161	88857683	ENSG00000211592.8	IGKC	1	0	0	1	0	0	0	1
chr16	27451042	27451042	97	INS	3	GM18864_XX_AFR_YRI_duplicate16384,GM19312_XY_AFR_LWK_duplicate16538,GM19473_XX_AFR_LWK_duplicate16621	chr16	27448534	27452042	ENSG00000103522.17	IL21R	9	0	0	1	0	0	1	0
chr3	101226225	101226225	50	INS	1	HG02817_XX_AFR_GWD_duplicate4345	chr3	101222546	101226981	ENSG00000081148.12	IMPG2	19	0	0	1	0	0	1	0
chr14	104720443	104720650	-207	DEL	1	GM19035_XY_AFR_LWK_duplicate15728	chr14	104718795	104722535	ENSG00000203485.14	INF2	23	0	0	1	0	0	1	0
chr14	104720954	104721067	-113	DEL	1	GM19035_XY_AFR_LWK_duplicate15729	chr14	104718795	104722535	ENSG00000203485.14	INF2	23	0	0	1	0	0	1	0
chr14	104720409	104720753	-344	DEL	1	HG00525_XX_EAS_CHS_duplicate13347	chr14	104718795	104722535	ENSG00000203485.14	INF2	23	0	0	1	0	0	1	0
chr14	104720499	104720601	-102	DEL	9	HG00525_XX_EAS_CHS_duplicate13348,HG00599_XX_EAS_CHS_duplicate13390,HG01046_XX_EAS_CDX_duplicate13393,HG01695_XX_EUR_IBS_duplicate13402,HG02048_XX_EAS_KHV_duplicate13503,HG02817_XX_AFR_GWD_duplicate15410,HG03069_XY_AFR_MSL_duplicate15907,HG03279_XX_AFR_ESN_duplicate15380,HG03548_XX_AFR_MSL_duplicate15473	chr14	104718795	104722535	ENSG00000203485.14	INF2	23	0	0	1	0	0	1	0
chr14	104720601	104720601	70	INS	15	GM18856_XY_AFR_YRI_duplicate15774,HG00110_XX_EUR_GBR_duplicate13307,HG00121_XX_EUR_GBR_duplicate519,HG00136_XY_EUR_GBR_duplicate13434,HG01615_XY_EUR_IBS_duplicate356,HG02262_XY_AMR_PEL_duplicate315,HG02409_XY_EAS_CDX_duplicate326,HG02614_XX_AFR_GWD_duplicate614,HG02731_XX_SAS_PJL_duplicate500,HG03120_XY_AFR_ESN_duplicate15634,HG03631_XX_SAS_PJL_duplicate13620,HG03643_XX_SAS_STU_duplicate652,HG036…	chr14	104718795	104722535	ENSG00000203485.14	INF2	23	0	0	1	0	0	1	0
chr14	104720719	104720719	141	INS	1	HG04054_XX_SAS_ITU_duplicate587	chr14	104718795	104722535	ENSG00000203485.14	INF2	23	0	0	1	0	0	1	0
chr7	2612576	2612576	66	INS	1	HG03770_XX_SAS_ITU_duplicate7403	chr7	2610044	2614728	ENSG00000106012.19	IQCE	22	0	0	1	0	0	0	1
chr21	37616590	37616590	52	INS	18	GM18871_XY_AFR_YRI_duplicate19956,HG00105_XY_EUR_GBR_duplicate17178,HG00151_XY_EUR_GBR_duplicate17165,HG00631_XY_EAS_CHS_duplicate16705,HG00728_XY_EAS_CHS_duplicate16288,HG01372_XX_AMR_CLM_duplicate17229,HG01501_XX_EUR_IBS_duplicate16288,HG02185_XX_EAS_CDX_duplicate16839,HG02262_XY_AMR_PEL_duplicate16930,HG02312_XX_AMR_PEL_duplicate17180,HG02974_XX_AFR_ESN_duplicate19449,HG03121_XX_AFR_ESN_duplic…	chr21	37607373	37625484	ENSG00000157542.11	KCNJ6	4	0	0	1	0	0	0	1
chr5	170375560	170375614	-54	DEL	46	GM18864_XX_AFR_YRI_duplicate6920,GM18876_XX_AFR_YRI_duplicate7023,GM19035_XY_AFR_LWK_duplicate7055,GM19471_XX_AFR_LWK_duplicate6987,HG00110_XX_EUR_GBR_duplicate5997,HG00121_XX_EUR_GBR_duplicate5992,HG00127_XX_EUR_GBR_duplicate5873,HG00331_XX_EUR_FIN_duplicate6169,HG00410_XX_EAS_CHS_duplicate6048,HG00473_XX_EAS_CHS_duplicate5985,HG00525_XX_EAS_CHS_duplicate6044,HG00631_XY_EAS_CHS_duplicate5998,HG0…	chr5	170374671	170378973	ENSG00000145936.9	KCNMB1	4	0	0	1	0	0	0	1
chr20	63404331	63404399	-68	DEL	3	GM18861_XX_AFR_YRI_duplicate19964,GM19035_XY_AFR_LWK_duplicate19562,GM19471_XX_AFR_LWK_duplicate20027	chr20	63400208	63407375	ENSG00000075043.21	KCNQ2	17	0	0	1	0	0	0	1
chr20	63402000	63402059	-59	DEL	20	GM18865_XY_AFR_YRI_duplicate19863,GM18871_XY_AFR_YRI_duplicate19691,GM19035_XY_AFR_LWK_duplicate19561,GM19041_XY_AFR_LWK_duplicate19680,GM19308_XY_AFR_LWK_duplicate19783,GM19473_XX_AFR_LWK_duplicate19803,HG00121_XX_EUR_GBR_duplicate16417,HG01281_XX_AMR_CLM_duplicate16603,HG01372_XX_AMR_CLM_duplicate16994,HG01414_XX_AMR_PUR_duplicate17495,HG01468_XX_AMR_CLM_duplicate15981,HG01695_XX_EUR_IBS_duplic…	chr20	63400208	63407375	ENSG00000075043.21	KCNQ2	17	0	0	1	0	0	0	1
chr19	5144400	5144400	225	INS	2	HG01122_XX_AMR_CLM_duplicate15630,HG03744_XY_SAS_STU_duplicate15909	chr19	5144248	5144412	ENSG00000127663.15	KDM4B	20	0	0	1	0	0	0	1
chr19	5131538	5131538	362	INS	27	GM18924_XX_AFR_YRI_duplicate18376,GM19471_XX_AFR_LWK_duplicate18753,GM19473_XX_AFR_LWK_duplicate18531,HG00331_XX_EUR_FIN_duplicate15881,HG00473_XX_EAS_CHS_duplicate16033,HG01122_XX_AMR_CLM_duplicate15628,HG01281_XX_AMR_CLM_duplicate15633,HG01395_XY_AMR_PUR_duplicate16168,HG01468_XX_AMR_CLM_duplicate15060,HG01501_XX_EUR_IBS_duplicate15147,HG01615_XY_EUR_IBS_duplicate15773,HG01695_XX_EUR_IBS_duplic…	chr19	5131076	5131545	ENSG00000127663.15	KDM4B	12	0	0	2	0	0	1	1
chr19	5144400	5144400	75	INS	86	GM18519_XY_AFR_YRI_duplicate18640,GM18856_XY_AFR_YRI_duplicate18537,GM18861_XX_AFR_YRI_duplicate18762,GM18864_XX_AFR_YRI_duplicate18233,GM18865_XY_AFR_YRI_duplicate18611,GM18871_XY_AFR_YRI_duplicate18490,GM18876_XX_AFR_YRI_duplicate18504,GM19041_XY_AFR_LWK_duplicate18455,GM19308_XY_AFR_LWK_duplicate18572,GM19312_XY_AFR_LWK_duplicate18415,GM19462_XX_AFR_LWK_duplicate18677,GM19471_XX_AFR_LWK_duplic…	chr19	5144248	5144412	ENSG00000127663.15	KDM4B	20	0	0	2	0	0	1	1
chr19	54823357	54857411	-34054	DEL	1	GM18871_XY_AFR_YRI_duplicate456	chr19	54825028	54825078	ENSG00000167633.18	KIR3DL1	6	0	0	2	0	0	1	1
chr19	54823357	54857411	-34054	DEL	1	GM18871_XY_AFR_YRI_duplicate456	chr19	54829361	54829465	ENSG00000167633.18	KIR3DL1	7	0	0	2	0	0	1	1
chr19	54823357	54857411	-34054	DEL	1	GM18871_XY_AFR_YRI_duplicate456	chr19	54829928	54829980	ENSG00000167633.18	KIR3DL1	8	0	0	2	0	0	1	1
chr19	54823357	54857411	-34054	DEL	1	GM18871_XY_AFR_YRI_duplicate456	chr19	54830099	54830778	ENSG00000167633.18	KIR3DL1	9	0	0	2	0	0	1	1
chr19	50906590	50906657	-67	DEL	42	GM18519_XY_AFR_YRI_duplicate19080,GM18865_XY_AFR_YRI_duplicate19065,GM18871_XY_AFR_YRI_duplicate18944,GM18876_XX_AFR_YRI_duplicate18914,GM18924_XX_AFR_YRI_duplicate18838,GM19035_XY_AFR_LWK_duplicate18807,GM19312_XY_AFR_LWK_duplicate18868,HG00105_XY_EUR_GBR_duplicate16315,HG00121_XX_EUR_GBR_duplicate15825,HG00127_XX_EUR_GBR_duplicate14810,HG00136_XY_EUR_GBR_duplicate16096,HG00331_XX_EUR_FIN_duplic…	chr19	50906351	50907086	ENSG00000167749.12	KLK4	6	0	0	2	0	0	1	1
chr19	50906657	50906657	67	INS	69	GM18856_XY_AFR_YRI_duplicate18979,GM18861_XX_AFR_YRI_duplicate19219,GM18864_XX_AFR_YRI_duplicate18674,GM18865_XY_AFR_YRI_duplicate19066,GM18871_XY_AFR_YRI_duplicate18945,GM18876_XX_AFR_YRI_duplicate18915,GM18924_XX_AFR_YRI_duplicate18839,GM19035_XY_AFR_LWK_duplicate18808,GM19041_XY_AFR_LWK_duplicate18897,GM19308_XY_AFR_LWK_duplicate19020,GM19312_XY_AFR_LWK_duplicate18869,GM19462_XX_AFR_LWK_duplic…	chr19	50906351	50907086	ENSG00000167749.12	KLK4	6	0	3	0	0	0	3	0
chr10	87858654	87860035	-1381	DEL	1	GM19312_XY_AFR_LWK_duplicate12143	chr10	87859158	87863533	ENSG00000227268.5	KLLN	1	1	0	0	0	0	1	0
chr17	40818851	40818851	60	INS	30	GM18861_XX_AFR_YRI_duplicate17632,GM18871_XY_AFR_YRI_duplicate17399,GM18876_XX_AFR_YRI_duplicate17378,GM19041_XY_AFR_LWK_duplicate17355,GM19462_XX_AFR_LWK_duplicate17545,GM19473_XX_AFR_LWK_duplicate17381,HG00473_XX_EAS_CHS_duplicate15035,HG00525_XX_EAS_CHS_duplicate14701,HG00599_XX_EAS_CHS_duplicate14772,HG00631_XY_EAS_CHS_duplicate14577,HG00705_XX_EAS_CHS_duplicate14902,HG00706_XY_EAS_CHS_duplic…	chr17	40818787	40819161	ENSG00000186395.9	KRT10	7	0	0	1	0	2	3	0
chr17	41567438	41567636	-198	DEL	1	HG03643_XX_SAS_STU_duplicate14776	chr17	41567233	41567750	ENSG00000171403.10	KRT9	7	0	0	1	0	2	3	0
chr2	143046570	143046570	126	INS	5	GM19308_XY_AFR_LWK_duplicate2937,HG00151_XY_EUR_GBR_duplicate2531,HG01615_XY_EUR_IBS_duplicate2526,HG03814_XX_SAS_BEB_duplicate2730,HG03898_XX_SAS_STU_duplicate2716	chr2	143042047	143055833	ENSG00000115919.15	KYNU	14	0	0	1	0	2	3	0
chr1	153261301	153261301	144	INS	1	HG00631_XY_EAS_CHS_duplicate1552	chr1	153260927	153262124	ENSG00000203782.6	LORICRIN	2	0	1	5	1	1	7	1
chr6	160606992	160613395	-6403	DEL	1	GM19308_XY_AFR_LWK_duplicate8183	chr6	160611562	160611721	ENSG00000198670.13	LPA	16	11	1	3	0	2	10	7
chr6	160606992	160613395	-6403	DEL	1	GM19308_XY_AFR_LWK_duplicate8183	chr6	160612932	160613113	ENSG00000198670.13	LPA	15	11	1	3	0	2	10	7
chr4	3509500	3509500	220	INS	5	HG01369_XX_AMR_CLM_duplicate150,HG02102_XX_AMR_PEL_duplicate4234,HG02185_XX_EAS_CDX_duplicate4310,HG02312_XX_AMR_PEL_duplicate4315,HG02694_XX_SAS_PJL_duplicate191	chr4	3503612	3513036	ENSG00000163956.13	LRPAP1	8	11	1	3	0	2	10	7
chr4	3509604	3509824	-220	DEL	3	GM18871_XY_AFR_YRI_duplicate4834,HG02282_XX_AFR_ACB_duplicate5113,HG03069_XY_AFR_MSL_duplicate5130	chr4	3503612	3513036	ENSG00000163956.13	LRPAP1	8	1	0	3	2	5	9	2
chr4	3509228	3509228	55	INS	3	GM18864_XX_AFR_YRI_duplicate4767,HG02731_XX_SAS_PJL_duplicate4399,HG03631_XX_SAS_PJL_duplicate4249	chr4	3503612	3513036	ENSG00000163956.13	LRPAP1	8	0	0	0	0	1	1	0
chr4	3509551	3509551	389	INS	5	HG00105_XY_EUR_GBR_duplicate143,HG01414_XX_AMR_PUR_duplicate168,HG02615_XX_AFR_GWD_duplicate246,HG03646_XY_SAS_STU_duplicate234,HG03744_XY_SAS_STU_duplicate183	chr4	3503612	3513036	ENSG00000163956.13	LRPAP1	8	23	4	4	6	13	33	17
chr4	3509448	3509668	-220	DEL	2	HG03022_XX_SAS_PJL_duplicate4205,HG03774_XX_SAS_ITU_duplicate4213	chr4	3503612	3513036	ENSG00000163956.13	LRPAP1	8	33	14	20	11	22	70	30
chr4	3509613	3509668	-55	DEL	19	GM18861_XX_AFR_YRI_duplicate4890,GM18865_XY_AFR_YRI_duplicate4918,GM18924_XX_AFR_YRI_duplicate4885,GM19473_XX_AFR_LWK_duplicate4869,HG00127_XX_EUR_GBR_duplicate4255,HG00136_XY_EUR_GBR_duplicate4198,HG00525_XX_EAS_CHS_duplicate4303,HG00728_XY_EAS_CHS_duplicate4428,HG01312_XX_AMR_PUR_duplicate4393,HG01501_XX_EUR_IBS_duplicate4235,HG02282_XX_AFR_ACB_duplicate5114,HG02614_XX_AFR_GWD_duplicate5016,HG0…	chr4	3503612	3513036	ENSG00000163956.13	LRPAP1	8	33	14	20	11	22	70	30
chr4	3509555	3509555	55	INS	13	GM19041_XY_AFR_LWK_duplicate159,GM19312_XY_AFR_LWK_duplicate4841,GM19471_XX_AFR_LWK_duplicate4819,HG00331_XX_EUR_FIN_duplicate4378,HG00599_XX_EAS_CHS_duplicate4186,HG00705_XX_EAS_CHS_duplicate4319,HG00706_XY_EAS_CHS_duplicate4277,HG01363_XX_AMR_CLM_duplicate4318,HG01372_XX_AMR_CLM_duplicate4327,HG01790_XX_EUR_GBR_duplicate152,HG03121_XX_AFR_ESN_duplicate5049,HG04054_XX_SAS_ITU_duplicate4394,GM185…	chr4	3503612	3513036	ENSG00000163956.13	LRPAP1	8	22	10	11	9	6	39	19
chr4	3511843	3511896	-53	DEL	65	GM18519_XY_AFR_YRI_duplicate4880,GM18856_XY_AFR_YRI_duplicate4781,GM19035_XY_AFR_LWK_duplicate4927,GM19041_XY_AFR_LWK_duplicate4939,GM19308_XY_AFR_LWK_duplicate4888,GM19312_XY_AFR_LWK_duplicate4842,GM19462_XX_AFR_LWK_duplicate4857,GM19471_XX_AFR_LWK_duplicate4820,HG00105_XY_EUR_GBR_duplicate4226,HG00110_XX_EUR_GBR_duplicate4260,HG00121_XX_EUR_GBR_duplicate4203,HG00127_XX_EUR_GBR_duplicate4256,HG0…	chr4	3503612	3513036	ENSG00000163956.13	LRPAP1	8	22	10	11	9	6	39	19
chr11	76658534	76658534	324	INS	1	GM19312_XY_AFR_LWK_duplicate13100	chr11	76657524	76661508	ENSG00000137507.11	LRRC32	3	5	0	0	0	0	1	4
chr21	46189828	46190958	-1130	DEL	13	GM18865_XY_AFR_YRI_duplicate20340,GM18876_XX_AFR_YRI_duplicate20156,GM18924_XX_AFR_YRI_duplicate20082,GM19308_XY_AFR_LWK_duplicate20261,GM19312_XY_AFR_LWK_duplicate20111,HG02615_XX_AFR_GWD_duplicate19615,HG02817_XX_AFR_GWD_duplicate19810,HG02974_XX_AFR_ESN_duplicate19658,HG03120_XY_AFR_ESN_duplicate19842,HG03121_XX_AFR_ESN_duplicate20471,HG03279_XX_AFR_ESN_duplicate19513,HG03499_XX_AFR_ESN_duplic…	chr21	46188446	46191235	ENSG00000160285.15	LSS	22	1	0	0	0	0	1	0
chr5	10435623	10435691	-68	DEL	1	HG03774_XX_SAS_ITU_duplicate5385	chr5	10433594	10440388	ENSG00000145495.17	MARCHF6	26	1	0	0	0	0	0	1
chr1	11037589	11046272	-8683	DEL	1	GM19035_XY_AFR_LWK_duplicate925	chr1	11037693	11037811	ENSG00000009724.18	MASP2	7	0	0	2	0	0	1	1
chr1	11037589	11046272	-8683	DEL	1	GM19035_XY_AFR_LWK_duplicate925	chr1	11042875	11043022	ENSG00000009724.18	MASP2	6	0	0	1	0	0	1	0
chr1	11037589	11046272	-8683	DEL	1	GM19035_XY_AFR_LWK_duplicate925	chr1	11043339	11043535	ENSG00000009724.18	MASP2	5	1	0	0	0	0	0	1
chr1	11037589	11046272	-8683	DEL	1	GM19035_XY_AFR_LWK_duplicate925	chr1	11045408	11045539	ENSG00000009724.18	MASP2	4	0	0	1	0	0	0	1
chr12	116277340	116277340	118	INS	100	GM18519_XY_AFR_YRI_duplicate14331,GM18856_XY_AFR_YRI_duplicate14247,GM18861_XX_AFR_YRI_duplicate14394,GM18864_XX_AFR_YRI_duplicate14043,GM18865_XY_AFR_YRI_duplicate14366,GM18871_XY_AFR_YRI_duplicate14231,GM18876_XX_AFR_YRI_duplicate14138,GM18924_XX_AFR_YRI_duplicate14081,GM19035_XY_AFR_LWK_duplicate14183,GM19041_XY_AFR_LWK_duplicate14334,GM19308_XY_AFR_LWK_duplicate14358,GM19312_XY_AFR_LWK_duplic…	chr12	116277060	116277693	ENSG00000123066.9	MED13L	1	0	0	1	0	0	0	1
chr22	50060697	50060799	-102	DEL	47	GM18856_XY_AFR_YRI_duplicate20655,GM18861_XX_AFR_YRI_duplicate20873,GM19041_XY_AFR_LWK_duplicate20623,GM19462_XX_AFR_LWK_duplicate20783,GM19471_XX_AFR_LWK_duplicate20978,GM19473_XX_AFR_LWK_duplicate20758,HG00110_XX_EUR_GBR_duplicate17304,HG00151_XY_EUR_GBR_duplicate17715,HG00410_XX_EAS_CHS_duplicate17780,HG00525_XX_EAS_CHS_duplicate17292,HG00675_XX_EAS_CHS_duplicate17259,HG00706_XY_EAS_CHS_duplic…	chr22	50059391	50061657	ENSG00000100427.16	MLC1	12	1	0	0	0	0	1	0
chr16	83918715	83918796	-81	DEL	2	HG00675_XX_EAS_CHS_duplicate14174,HG00728_XY_EAS_CHS_duplicate13880	chr16	83914956	83927031	ENSG00000103150.7	MLYCD	5	1	0	0	0	0	1	0
chr16	83921854	83921854	67	INS	8	HG00705_XX_EAS_CHS_duplicate14439,HG01501_XX_EUR_IBS_duplicate13808,HG01812_XX_EAS_CDX_duplicate13818,HG01862_XX_EAS_KHV_duplicate14578,HG02185_XX_EAS_CDX_duplicate14263,HG02345_XX_AMR_PEL_duplicate14867,HG02396_XY_EAS_CDX_duplicate14233,HG03861_XX_SAS_ITU_duplicate14655	chr16	83914956	83927031	ENSG00000103150.7	MLYCD	5	1	0	0	0	0	0	1
chr16	83916879	83917094	-215	DEL	5	GM18865_XY_AFR_YRI_duplicate16975,GM18871_XY_AFR_YRI_duplicate16887,GM19312_XY_AFR_LWK_duplicate412,HG03279_XX_AFR_ESN_duplicate761,GM18501_XY_AFR_YRI_duplicate17136	chr16	83914956	83927031	ENSG00000103150.7	MLYCD	5	2	0	1	0	0	2	1
chr10	125766491	125766491	329	INS	1	HG04063_XX_SAS_ITU_duplicate10548	chr10	125766453	125766961	ENSG00000154485.5	MMP21	7	1	0	0	0	0	1	0
chr6	39905999	39905999	92	INS	6	HG01363_XX_AMR_CLM_duplicate6756,HG01790_XX_EUR_GBR_duplicate6427,HG01862_XX_EAS_KHV_duplicate6356,HG02252_XX_AMR_PEL_duplicate6378,HG02373_XY_EAS_CDX_duplicate6340,HG04216_XX_SAS_ITU_duplicate6572	chr6	39904170	39907117	ENSG00000124615.20	MOCS1	11	10	1	0	3	1	9	6
chr11	59209875	59209875	87	INS	78	GM18856_XY_AFR_YRI_duplicate12972,GM18861_XX_AFR_YRI_duplicate13159,GM18864_XX_AFR_YRI_duplicate12841,GM18865_XY_AFR_YRI_duplicate13122,GM18876_XX_AFR_YRI_duplicate12973,GM19041_XY_AFR_LWK_duplicate13151,GM19308_XY_AFR_LWK_duplicate13138,GM19312_XY_AFR_LWK_duplicate12959,GM19462_XX_AFR_LWK_duplicate13072,GM19473_XX_AFR_LWK_duplicate13051,HG00105_XY_EUR_GBR_duplicate11253,HG00110_XX_EUR_GBR_duplic…	chr11	59208510	59212927	ENSG00000197629.6	MPEG1	1	9	0	0	0	0	6	3
chr11	60460691	60461913	-1222	DEL	2	HG01363_XX_AMR_CLM_duplicate11682,HG02262_XY_AMR_PEL_duplicate11040	chr11	60461072	60461160	ENSG00000156738.18	MS4A1	2	0	0	0	0	1	1	0
chr11	60093427	60115827	-22400	DEL	1	GM18864_XX_AFR_YRI_duplicate12846	chr11	60093400	60093558	ENSG00000149534.9	MS4A2	5	0	1	5	1	3	9	1
chr11	60093427	60115827	-22400	DEL	1	GM18864_XX_AFR_YRI_duplicate12846	chr11	60093964	60094062	ENSG00000149534.9	MS4A2	6	0	0	0	0	1	1	0
chr11	60093427	60115827	-22400	DEL	1	GM18864_XX_AFR_YRI_duplicate12846	chr11	60095558	60098467	ENSG00000149534.9	MS4A2	7	7	6	10	5	14	30	12
chr1	75796601	75799160	-2559	DEL	1	HG01363_XX_AMR_CLM_duplicate1032	chr1	75796882	75797229	ENSG00000057468.7	MSH4	1	13	2	2	1	8	18	8
chr9	21866440	21866510	-70	DEL	1	HG01046_XX_EAS_CDX_duplicate9065	chr9	21861976	21867081	ENSG00000099810.21	MTAP	8	1	0	0	0	0	0	1
chr6	73506914	73506914	698	INS	99	GM18519_XY_AFR_YRI_duplicate7791,GM18856_XY_AFR_YRI_duplicate7625,GM18861_XX_AFR_YRI_duplicate7789,GM18864_XX_AFR_YRI_duplicate7573,GM18871_XY_AFR_YRI_duplicate7651,GM18876_XX_AFR_YRI_duplicate7718,GM18924_XX_AFR_YRI_duplicate7627,GM19035_XY_AFR_LWK_duplicate7693,GM19041_XY_AFR_LWK_duplicate7805,GM19308_XY_AFR_LWK_duplicate7710,GM19312_XY_AFR_LWK_duplicate7698,GM19462_XX_AFR_LWK_duplicate7661,GM1…	chr6	73500574	73509236	ENSG00000135297.17	MTO1	12	1	0	0	0	0	0	1
chr11	1251466	1251466	87	INS	3	HG00331_XX_EUR_FIN_duplicate10842,HG01369_XX_AMR_CLM_duplicate11256,HG01395_XY_AMR_PUR_duplicate10976	chr11	1240851	1251743	ENSG00000117983.17	MUC5B	31	2	0	0	0	0	1	1
chr11	1243070	1248509	-5439	DEL	1	HG02312_XX_AMR_PEL_duplicate10864	chr11	1240851	1251743	ENSG00000117983.17	MUC5B	31	0	0	1	0	0	1	0
chr11	1255550	1255668	-118	DEL	1	HG02615_XX_AFR_GWD_duplicate604	chr11	1255383	1255558	ENSG00000117983.17	MUC5B	37	0	0	1	0	0	1	0
chr11	1244155	1244155	425	INS	4	HG00331_XX_EUR_FIN_duplicate10838,HG01369_XX_AMR_CLM_duplicate11252,HG01395_XY_AMR_PUR_duplicate10973,HG02694_XX_SAS_PJL_duplicate10740	chr11	1240851	1251743	ENSG00000117983.17	MUC5B	31	0	0	1	0	0	1	0
chr11	1245025	1245112	-87	DEL	4	HG00331_XX_EUR_FIN_duplicate10839,HG01369_XX_AMR_CLM_duplicate11253,HG01395_XY_AMR_PUR_duplicate10974,HG02694_XX_SAS_PJL_duplicate10741	chr11	1240851	1251743	ENSG00000117983.17	MUC5B	31	0	0	1	0	0	1	0
chr11	1248236	1248314	-78	DEL	4	HG00331_XX_EUR_FIN_duplicate10840,HG01369_XX_AMR_CLM_duplicate11254,HG01395_XY_AMR_PUR_duplicate10975,HG02694_XX_SAS_PJL_duplicate10742	chr11	1240851	1251743	ENSG00000117983.17	MUC5B	31	1	0	0	0	0	1	0
chr11	1248796	1248883	-87	DEL	4	HG00331_XX_EUR_FIN_duplicate10841,HG01369_XX_AMR_CLM_duplicate11255,HG01395_XY_AMR_PUR_duplicate329,HG02694_XX_SAS_PJL_duplicate10743	chr11	1240851	1251743	ENSG00000117983.17	MUC5B	31	1	0	0	0	0	1	0
chr4	70481495	70481564	-69	DEL	17	GM18861_XX_AFR_YRI_duplicate5350,GM18864_XX_AFR_YRI_duplicate5214,HG00127_XX_EUR_GBR_duplicate4585,HG00525_XX_EAS_CHS_duplicate4677,HG00599_XX_EAS_CHS_duplicate4560,HG01122_XX_AMR_CLM_duplicate4803,HG01372_XX_AMR_CLM_duplicate4707,HG01395_XY_AMR_PUR_duplicate4701,HG01414_XX_AMR_PUR_duplicate4809,HG02051_XY_AFR_ACB_duplicate5559,HG02345_XX_AMR_PEL_duplicate4640,HG02373_XY_EAS_CDX_duplicate4601,HG0…	chr4	70480799	70482997	ENSG00000171195.11	MUC7	3	1	0	0	0	0	1	0
chr20	36548743	36555707	-6964	DEL	1	HG00105_XY_EUR_GBR_duplicate16694	chr20	36549077	36551447	ENSG00000101335.10	MYL9	4	1	0	0	0	0	1	0
chr10	26083358	26088274	-4916	DEL	1	HG00136_XY_EUR_GBR_duplicate10123	chr10	26088203	26088405	ENSG00000095777.17	MYO3A	15	1	0	0	0	0	1	0
chr10	26171083	26176249	-5166	DEL	1	HG01369_XX_AMR_CLM_duplicate10538	chr10	26173663	26174557	ENSG00000095777.17	MYO3A	30	1	0	0	0	0	1	0
chr11	71501699	71504676	-2977	DEL	5	HG02282_XX_AFR_ACB_duplicate12624,HG02614_XX_AFR_GWD_duplicate13046,HG02615_XX_AFR_GWD_duplicate12900,HG02979_XX_AFR_ESN_duplicate13235,HG03069_XY_AFR_MSL_duplicate13330	chr11	71501302	71501816	ENSG00000172890.13	NADSYN1	21	5	0	0	0	0	3	2
chr2	239959643	239959704	-61	DEL	4	HG02051_XY_AFR_ACB_duplicate3855,HG02979_XX_AFR_ESN_duplicate3586,HG03168_XX_AFR_ESN_duplicate3692,HG03548_XX_AFR_MSL_duplicate3979	chr2	239957372	239961186	ENSG00000130414.13	NDUFA10	10	1	0	0	0	0	1	0
chr2	239960107	239960179	-72	DEL	7	GM18861_XX_AFR_YRI_duplicate3517,GM18864_XX_AFR_YRI_duplicate3371,GM18865_XY_AFR_YRI_duplicate3550,GM19473_XX_AFR_LWK_duplicate3511,HG01695_XX_EUR_IBS_duplicate3274,HG02282_XX_AFR_ACB_duplicate3880,HG03571_XY_AFR_MSL_duplicate3703	chr2	239957372	239961186	ENSG00000130414.13	NDUFA10	10	4	0	4	1	0	8	1
chr2	151596886	151607432	-10546	DEL	1	HG01312_XX_AMR_PUR_duplicate2813	chr2	151596958	151597062	ENSG00000183091.21	NEB	91	10	0	1	0	1	8	4
chr2	151596886	151607432	-10546	DEL	1	HG01312_XX_AMR_PUR_duplicate2813	chr2	151597927	151598130	ENSG00000183091.21	NEB	90	3	1	1	4	6	8	7
chr2	151596886	151607432	-10546	DEL	1	HG01312_XX_AMR_PUR_duplicate2813	chr2	151600442	151600753	ENSG00000183091.21	NEB	89	0	0	0	0	1	1	0
chr2	151596886	151607432	-10546	DEL	1	HG01312_XX_AMR_PUR_duplicate2813	chr2	151601901	151602008	ENSG00000183091.21	NEB	88	0	0	0	0	1	1	0
chr2	151596886	151607432	-10546	DEL	1	HG01312_XX_AMR_PUR_duplicate2813	chr2	151602587	151602691	ENSG00000183091.21	NEB	87	0	0	0	1	0	0	1
chr2	151596886	151607432	-10546	DEL	1	HG01312_XX_AMR_PUR_duplicate2813	chr2	151603569	151603772	ENSG00000183091.21	NEB	86	0	0	1	0	0	1	0
chr2	151596886	151607432	-10546	DEL	1	HG01312_XX_AMR_PUR_duplicate2813	chr2	151604560	151604871	ENSG00000183091.21	NEB	85	5	0	0	0	0	3	2
chr2	151596886	151607432	-10546	DEL	1	HG01312_XX_AMR_PUR_duplicate2813	chr2	151606606	151606713	ENSG00000183091.21	NEB	84	13	0	0	0	0	8	5
chr22	29489629	29489881	-252	DEL	1	HG03814_XX_SAS_BEB_duplicate17059	chr22	29488849	29491390	ENSG00000100285.10	NEFH	4	7	3	1	2	0	9	4
chr14	49783959	49784250	-291	DEL	1	HG04216_XX_SAS_ITU_duplicate13453	chr14	49782083	49784713	ENSG00000165525.18	NEMF	33	17	8	2	6	7	31	9
chr2	219072653	219072653	73	INS	3	GM18856_XY_AFR_YRI_duplicate3297,HG02051_XY_AFR_ACB_duplicate3655,HG02282_XX_AFR_ACB_duplicate3716	chr2	219069357	219076455	ENSG00000187736.14	NHEJ1	8	0	0	1	1	7	7	2
chr14	50742201	50748790	-6589	DEL	1	HG01797_XX_EAS_CDX_duplicate12839	chr14	50743416	50743529	ENSG00000100503.27	NIN	24	1	0	0	0	0	1	0
chr14	50742201	50748790	-6589	DEL	1	HG01797_XX_EAS_CDX_duplicate12839	chr14	50744243	50744365	ENSG00000100503.27	NIN	23	0	0	0	1	0	1	0
chr14	50742201	50748790	-6589	DEL	1	HG01797_XX_EAS_CDX_duplicate12839	chr14	50747992	50748105	ENSG00000100503.27	NIN	22	0	0	0	1	0	0	1
chr3	174289957	174289957	78	INS	1	HG03868_XX_SAS_ITU_duplicate4075	chr3	174280481	174294372	ENSG00000169760.18	NLGN1	7	0	0	0	1	0	1	0
chr9	136495274	136495514	-240	DEL	1	HG03861_XX_SAS_ITU_duplicate9918	chr9	136494433	136497558	ENSG00000148400.13	NOTCH1	34	0	0	1	0	0	1	0
chr1	149390802	149390802	51	INS	2	GM19473_XX_AFR_LWK_duplicate1364,HG02389_XY_EAS_CDX_duplicate1184	chr1	149390621	149390922	ENSG00000286219.2	NOTCH2NLC	1	0	1	0	0	0	1	0
chr16	85825	85825	329	INS	1	HG03919_XX_SAS_BEB_duplicate14021	chr16	85386	86870	ENSG00000103148.17	NPRL3	14	0	2	0	0	0	2	0
chr12	68743120	68743187	-67	DEL	1	GM19473_XX_AFR_LWK_duplicate14009	chr12	68742355	68745809	ENSG00000111581.10	NUP107	28	0	0	0	0	1	1	0
chr5	37291624	37291683	-59	DEL	2	HG03069_XY_AFR_MSL_duplicate6641,HG03120_XY_AFR_ESN_duplicate6681	chr5	37288137	37292038	ENSG00000113569.16	NUP155	35	0	0	0	0	1	1	0
chr15	28017718	28020673	-2955	DEL	1	GM19035_XY_AFR_LWK_duplicate15865	chr15	28018397	28018557	ENSG00000104044.16	OCA2	7	32	13	15	8	17	58	27
chr21	46334547	46334547	195	INS	1	HG00525_XX_EAS_CHS_duplicate636	chr21	46334397	46334768	ENSG00000160299.19	PCNT	3	33	14	20	11	22	70	30
chr3	167683842	167683842	60	INS	1	HG01363_XX_AMR_CLM_duplicate4004	chr3	167683298	167684389	ENSG00000114209.15	PDCD10	9	1	0	0	0	0	1	0
chr1	7829912	7829966	-54	DEL	86	GM18519_XY_AFR_YRI_duplicate713,GM18856_XY_AFR_YRI_duplicate717,GM18861_XX_AFR_YRI_duplicate670,GM18864_XX_AFR_YRI_duplicate690,GM18871_XY_AFR_YRI_duplicate705,GM18924_XX_AFR_YRI_duplicate846,GM19035_XY_AFR_LWK_duplicate886,GM19308_XY_AFR_LWK_duplicate715,GM19462_XX_AFR_LWK_duplicate693,GM19471_XX_AFR_LWK_duplicate682,HG00105_XY_EUR_GBR_duplicate644,HG00110_XX_EUR_GBR_duplicate850,HG00121_XX_EUR_…	chr1	7829834	7830161	ENSG00000049246.15	PER3	19	1	0	0	0	0	1	0
chr12	7190512	7190512	90	INS	1	HG03898_XX_SAS_STU_duplicate11678	chr12	7190362	7190524	ENSG00000139197.11	PEX5	2	1	0	0	0	0	1	0
chr7	47774228	47775597	-1369	DEL	1	HG03022_XX_SAS_PJL_duplicate7476	chr7	47774614	47775166	ENSG00000158683.10	PKD1L1	57	1	0	0	0	0	0	1
chr6	51616562	51616633	-71	DEL	2	HG00473_XX_EAS_CHS_duplicate6474,HG00631_XY_EAS_CHS_duplicate6488	chr6	51615299	51619520	ENSG00000170927.15	PKHD1	67	1	0	0	0	0	0	1
chr3	171601495	171601495	326	INS	8	GM18871_XY_AFR_YRI_duplicate4481,HG01395_XY_AMR_PUR_duplicate4020,HG02614_XX_AFR_GWD_duplicate4666,HG02817_XX_AFR_GWD_duplicate4666,HG02974_XX_AFR_ESN_duplicate4759,HG03120_XY_AFR_ESN_duplicate4822,HG03571_XY_AFR_MSL_duplicate4653,GM18501_XY_AFR_YRI_duplicate4525	chr3	171600404	171603302	ENSG00000075651.17	PLD1	27	1	0	0	0	0	0	1
chr19	4512847	4513045	-198	DEL	1	GM18876_XX_AFR_YRI_duplicate18492	chr19	4510446	4513701	ENSG00000167676.5	PLIN4	5	1	0	0	0	0	0	1
chr19	4511362	4513045	-1683	DEL	1	HG03120_XY_AFR_ESN_duplicate18205	chr19	4510446	4513701	ENSG00000167676.5	PLIN4	5	1	0	0	0	0	0	1
chr19	4511338	4511338	297	INS	5	GM19462_XX_AFR_LWK_duplicate18662,GM19471_XX_AFR_LWK_duplicate18745,HG02282_XX_AFR_ACB_duplicate17515,HG03168_XX_AFR_ESN_duplicate18324,HG03499_XX_AFR_ESN_duplicate18347	chr19	4510446	4513701	ENSG00000167676.5	PLIN4	5	1	0	0	0	0	0	1
chr19	4511725	4511725	99	INS	76	GM18861_XX_AFR_YRI_duplicate18751,GM18871_XY_AFR_YRI_duplicate18481,GM19308_XY_AFR_LWK_duplicate18562,GM19473_XX_AFR_LWK_duplicate18520,HG00105_XY_EUR_GBR_duplicate15940,HG00110_XX_EUR_GBR_duplicate15561,HG00121_XX_EUR_GBR_duplicate15458,HG00127_XX_EUR_GBR_duplicate14476,HG00136_XY_EUR_GBR_duplicate15715,HG00151_XY_EUR_GBR_duplicate15918,HG00331_XX_EUR_FIN_duplicate15870,HG00410_XX_EAS_CHS_duplic…	chr19	4510446	4513701	ENSG00000167676.5	PLIN4	5	1	0	0	0	0	0	1
chr19	4512587	4513082	-495	DEL	15	GM19035_XY_AFR_LWK_duplicate18371,GM19041_XY_AFR_LWK_duplicate18442,HG02051_XY_AFR_ACB_duplicate17950,HG02502_XX_AFR_ACB_duplicate17807,HG02614_XX_AFR_GWD_duplicate18136,HG02731_XX_SAS_PJL_duplicate16168,HG02974_XX_AFR_ESN_duplicate18046,HG02979_XX_AFR_ESN_duplicate18623,HG03121_XX_AFR_ESN_duplicate18775,HG03563_XX_AFR_MSL_duplicate18819,HG03646_XY_SAS_STU_duplicate15854,HG03731_XX_SAS_ITU_duplic…	chr19	4510446	4513701	ENSG00000167676.5	PLIN4	5	1	0	0	0	0	0	1
chr12	56749054	56751325	-2271	DEL	1	HG03919_XX_SAS_BEB_duplicate12058	chr12	56751038	56751195	ENSG00000198056.16	PRIM1	2	0	2	0	1	0	2	1
chr14	90274253	90274253	101	INS	2	GM19041_XY_AFR_LWK_duplicate15583,GM19462_XX_AFR_LWK_duplicate15783	chr14	90272273	90275429	ENSG00000100764.14	PSMC1	11	0	0	1	0	0	1	0
chr20	49568117	49568117	54	INS	1	HG03861_XX_SAS_ITU_duplicate16933	chr20	49568043	49568137	ENSG00000124212.6	PTGIS	1	0	2	0	0	0	1	1
chr17	81935054	81935054	385	INS	1	HG03120_XY_AFR_ESN_duplicate17500	chr17	81934926	81935147	ENSG00000183010.17	PYCR1	4	0	2	0	0	0	1	1
chr17	76292679	76292979	-300	DEL	1	GM19471_XX_AFR_LWK_duplicate17793	chr17	76291015	76294021	ENSG00000129646.16	QRICH2	4	0	1	0	0	0	1	0
chr17	76292824	76292884	-60	DEL	13	GM18856_XY_AFR_YRI_duplicate17626,GM18876_XX_AFR_YRI_duplicate17592,GM19473_XX_AFR_LWK_duplicate17607,HG01312_XX_AMR_PUR_duplicate15649,HG02282_XX_AFR_ACB_duplicate16696,HG02615_XX_AFR_GWD_duplicate17150,HG02817_XX_AFR_GWD_duplicate17249,HG03069_XY_AFR_MSL_duplicate17731,HG03120_XY_AFR_ESN_duplicate17378,HG03548_XX_AFR_MSL_duplicate17190,HG03563_XX_AFR_MSL_duplicate17926,HG03571_XY_AFR_MSL_duplic…	chr17	76291015	76294021	ENSG00000129646.16	QRICH2	4	0	0	1	0	0	0	1
chr7	128307472	128307472	346	INS	4	GM18924_XX_AFR_YRI_duplicate9211,HG02502_XX_AFR_ACB_duplicate9262,HG03121_XX_AFR_ESN_duplicate9470,HG03548_XX_AFR_MSL_duplicate9397	chr7	128297685	128310931	ENSG00000106344.8	RBM28	19	0	0	1	0	0	0	1
chr7	103989356	103989356	51	INS	1	HG01801_XX_EAS_CDX_duplicate7676	chr7	103989131	103989658	ENSG00000189056.15	RELN	1	0	0	1	0	0	0	1
chr16	74666819	74666819	72	INS	11	HG00105_XY_EUR_GBR_duplicate14488,HG00705_XX_EAS_CHS_duplicate14378,HG01615_XY_EUR_IBS_duplicate14324,HG01801_XX_EAS_CDX_duplicate13981,HG01812_XX_EAS_CDX_duplicate13765,HG03499_XX_AFR_ESN_duplicate16656,HG03643_XX_SAS_STU_duplicate14301,HG03731_XX_SAS_ITU_duplicate14685,HG03770_XX_SAS_ITU_duplicate14391,HG03774_XX_SAS_ITU_duplicate14667,HG03898_XX_SAS_STU_duplicate14264	chr16	74666786	74666877	ENSG00000168411.14	RFWD3	1	1	0	0	0	0	1	0
chr6	166925387	166925471	-84	DEL	2	HG00705_XX_EAS_CHS_duplicate7143,HG00706_XY_EAS_CHS_duplicate7090	chr6	166922113	166929791	ENSG00000026297.17	RNASET2	9	0	2	0	1	1	3	1
chr3	196470185	196470260	-75	DEL	1	HG00599_XX_EAS_CHS_duplicate4071	chr3	196468783	196472772	ENSG00000163961.4	RNF168	6	0	2	0	1	1	3	1
chr3	196470449	196470534	-85	DEL	5	GM18856_XY_AFR_YRI_duplicate4666,GM18864_XX_AFR_YRI_duplicate4601,HG02817_XX_AFR_GWD_duplicate4891,HG03499_XX_AFR_ESN_duplicate4917,HG03548_XX_AFR_MSL_duplicate5098	chr3	196468783	196472772	ENSG00000163961.4	RNF168	6	0	2	0	1	1	3	1
chr3	196470185	196470568	-383	DEL	1	HG03971_XY_SAS_ITU_duplicate4264	chr3	196468783	196472772	ENSG00000163961.4	RNF168	6	0	2	0	1	1	3	1
chr3	196470045	196470120	-75	DEL	5	HG02409_XY_EAS_CDX_duplicate4144,HG02731_XX_SAS_PJL_duplicate4269,HG03898_XX_SAS_STU_duplicate4169,HG03919_XX_SAS_BEB_duplicate4303,HG04054_XX_SAS_ITU_duplicate4291	chr3	196468783	196472772	ENSG00000163961.4	RNF168	6	5	0	0	0	0	4	1
chr8	10610114	10610114	1146	INS	2	HG02614_XX_AFR_GWD_duplicate9951,HG02615_XX_AFR_GWD_duplicate9851	chr8	10606349	10613346	ENSG00000183638.6	RP1L1	4	1	0	0	0	0	1	0
chr8	10610071	10610071	384	INS	4	HG00525_XX_EAS_CHS_duplicate8403,HG03548_XX_AFR_MSL_duplicate555,HG03563_XX_AFR_MSL_duplicate10084,HG03571_XY_AFR_MSL_duplicate9824	chr8	10606349	10613346	ENSG00000183638.6	RP1L1	4	3	3	2	0	2	7	3
chr8	10608455	10608524	-69	DEL	2	HG03774_XX_SAS_ITU_duplicate8580,HG03814_XX_SAS_BEB_duplicate8483	chr8	10606349	10613346	ENSG00000183638.6	RP1L1	4	7	7	7	8	6	26	9
chr8	10610071	10610071	96	INS	49	GM18519_XY_AFR_YRI_duplicate10011,GM18856_XY_AFR_YRI_duplicate9864,GM18876_XX_AFR_YRI_duplicate9867,GM19308_XY_AFR_LWK_duplicate9951,GM19462_XX_AFR_LWK_duplicate9905,HG00105_XY_EUR_GBR_duplicate8572,HG00110_XX_EUR_GBR_duplicate8380,HG00136_XY_EUR_GBR_duplicate8454,HG00151_XY_EUR_GBR_duplicate8446,HG00331_XX_EUR_FIN_duplicate8578,HG00410_XX_EAS_CHS_duplicate8545,HG00473_XX_EAS_CHS_duplicate8473,HG…	chr8	10606349	10613346	ENSG00000183638.6	RP1L1	4	0	0	0	0	1	1	0
chrX	38286059	38286059	146	INS	1	GM18865_XY_AFR_YRI_duplicate20954	chrX	38284408	38287245	ENSG00000156313.15	RPGR	15	5	0	9	1	6	12	9
chr5	82270256	82273656	-3400	DEL	12	GM18876_XX_AFR_YRI_duplicate6597,GM19308_XY_AFR_LWK_duplicate6659,GM19462_XX_AFR_LWK_duplicate6545,HG00105_XY_EUR_GBR_duplicate5717,HG01122_XX_AMR_CLM_duplicate5824,HG01363_XX_AMR_CLM_duplicate5918,HG02979_XX_AFR_ESN_duplicate6652,HG03069_XY_AFR_MSL_duplicate6880,HG03279_XX_AFR_ESN_duplicate6619,HG03868_XX_SAS_ITU_duplicate5733,HG04216_XX_SAS_ITU_duplicate5802,GM18501_XY_AFR_YRI_duplicate6676	chr5	82273320	82276255	ENSG00000186468.13	RPS23	4	3	0	0	0	5	5	3
chr1	37611748	37611748	71	INS	34	GM18519_XY_AFR_YRI_duplicate960,GM18856_XY_AFR_YRI_duplicate966,GM18861_XX_AFR_YRI_duplicate908,GM18864_XX_AFR_YRI_duplicate935,GM18871_XY_AFR_YRI_duplicate962,GM18876_XX_AFR_YRI_duplicate954,GM19312_XY_AFR_LWK_duplicate949,GM19473_XX_AFR_LWK_duplicate922,HG00631_XY_EAS_CHS_duplicate1164,HG01122_XX_AMR_CLM_duplicate1161,HG01312_XX_AMR_PUR_duplicate1034,HG01414_XX_AMR_PUR_duplicate952,HG01615_XY_E…	chr1	37611350	37612921	ENSG00000169218.14	RSPO1	7	0	0	0	0	1	1	0
chr20	959104	959104	132	INS	1	HG01797_XX_EAS_CDX_duplicate15723	chr20	958452	960466	ENSG00000101282.9	RSPO4	5	16	9	0	3	2	24	6
chr20	959135	959199	-64	DEL	22	GM18871_XY_AFR_YRI_duplicate19120,GM19035_XY_AFR_LWK_duplicate18969,GM19308_XY_AFR_LWK_duplicate19181,HG00127_XX_EUR_GBR_duplicate14936,HG00151_XY_EUR_GBR_duplicate16446,HG00331_XX_EUR_FIN_duplicate16359,HG00473_XX_EAS_CHS_duplicate16537,HG00525_XX_EAS_CHS_duplicate16081,HG00631_XY_EAS_CHS_duplicate15977,HG01395_XY_AMR_PUR_duplicate16642,HG01414_XX_AMR_PUR_duplicate16983,HG01615_XY_EUR_IBS_duplic…	chr20	958452	960466	ENSG00000101282.9	RSPO4	5	24	10	14	11	19	55	23
chr22	20268311	20268311	209	INS	97	GM18519_XY_AFR_YRI_duplicate20370,GM18856_XY_AFR_YRI_duplicate20307,GM18861_XX_AFR_YRI_duplicate20511,GM18864_XX_AFR_YRI_duplicate20009,GM18865_XY_AFR_YRI_duplicate20425,GM18871_XY_AFR_YRI_duplicate20271,GM18876_XX_AFR_YRI_duplicate20247,GM18924_XX_AFR_YRI_duplicate20146,GM19035_XY_AFR_LWK_duplicate20107,GM19041_XY_AFR_LWK_duplicate20243,GM19308_XY_AFR_LWK_duplicate20358,GM19312_XY_AFR_LWK_duplic…	chr22	20268071	20268318	ENSG00000040608.14	RTN4R	1	1	0	0	0	0	0	1
chr11	9839670	9839765	-95	DEL	2	HG01414_XX_AMR_PUR_duplicate11350,HG02262_XY_AMR_PEL_duplicate10790	chr11	9839498	9839696	ENSG00000133812.18	SBF2	26	0	0	0	1	0	1	0
chr17	80209632	80209632	57	INS	3	GM18856_XY_AFR_YRI_duplicate17682,GM19312_XY_AFR_LWK_duplicate17640,HG02502_XX_AFR_ACB_duplicate17051	chr17	80209276	80211011	ENSG00000181523.13	SGSH	8	0	0	0	1	0	0	1
chr12	111416148	111421448	-5300	DEL	1	HG00599_XX_EAS_CHS_duplicate12058	chr12	111418119	111418877	ENSG00000111252.11	SH2B3	2	0	1	0	0	0	1	0
chr5	148990266	148990266	339	INS	1	GM18865_XY_AFR_YRI_duplicate7063	chr5	148982150	149004902	ENSG00000169247.14	SH3TC2	17	0	0	0	1	0	1	0
chr11	116844635	116844635	53	INS	1	HG03279_XX_AFR_ESN_duplicate13085	chr11	116843402	116845629	ENSG00000160584.17	SIK3	25	0	0	1	0	0	1	0
chr1	2309744	2309744	121	INS	9	GM18856_XY_AFR_YRI_duplicate617,GM18876_XX_AFR_YRI_duplicate586,GM19312_XY_AFR_LWK_duplicate589,HG02051_XY_AFR_ACB_duplicate1047,HG02694_XX_SAS_PJL_duplicate709,HG02817_XX_AFR_GWD_duplicate977,HG03571_XY_AFR_MSL_duplicate1018,HG03668_XX_SAS_PJL_duplicate932,HG03864_XY_SAS_ITU_duplicate81	chr1	2306577	2310213	ENSG00000157933.11	SKI	7	1	0	0	0	0	1	0
chr12	50983023	50986546	-3523	DEL	1	HG00151_XY_EUR_GBR_duplicate11893	chr12	50985992	50988435	ENSG00000110911.17	SLC11A2	16	1	0	0	0	0	1	0
chr1	110199859	110199913	-54	DEL	1	HG01281_XX_AMR_CLM_duplicate1404	chr1	110198076	110202202	ENSG00000197106.7	SLC6A17	12	1	0	0	0	0	1	0
chr5	1223671	1223743	-72	DEL	28	GM18519_XY_AFR_YRI_duplicate6159,GM18871_XY_AFR_YRI_duplicate6061,GM18876_XX_AFR_YRI_duplicate6092,HG00151_XY_EUR_GBR_duplicate5212,HG00473_XX_EAS_CHS_duplicate5263,HG00631_XY_EAS_CHS_duplicate5295,HG00705_XX_EAS_CHS_duplicate5345,HG01312_XX_AMR_PUR_duplicate5498,HG01369_XX_AMR_CLM_duplicate5433,HG01372_XX_AMR_CLM_duplicate5410,HG01468_XX_AMR_CLM_duplicate5317,HG01695_XX_EUR_IBS_duplicate5394,HG0…	chr5	1221701	1225111	ENSG00000174358.16	SLC6A19	12	0	0	0	0	2	2	0
chr5	1223559	1223559	144	INS	48	GM18856_XY_AFR_YRI_duplicate6045,GM18861_XX_AFR_YRI_duplicate6168,GM18864_XX_AFR_YRI_duplicate6038,GM18865_XY_AFR_YRI_duplicate6225,GM18871_XY_AFR_YRI_duplicate6060,GM18876_XX_AFR_YRI_duplicate6091,GM19308_XY_AFR_LWK_duplicate6176,HG00110_XX_EUR_GBR_duplicate5265,HG00121_XX_EUR_GBR_duplicate5242,HG00127_XX_EUR_GBR_duplicate5200,HG00151_XY_EUR_GBR_duplicate5211,HG00331_XX_EUR_FIN_duplicate5422,HG0…	chr5	1221701	1225111	ENSG00000174358.16	SLC6A19	12	3	0	0	0	1	3	1
chr5	1393819	1393899	-80	DEL	1	GM19041_XY_AFR_LWK_duplicate6211	chr5	1392794	1394758	ENSG00000142319.18	SLC6A3	15	1	0	0	0	4	4	1
chr5	1392911	1392911	82	INS	1	HG03814_XX_SAS_BEB_duplicate5355	chr5	1392794	1394758	ENSG00000142319.18	SLC6A3	15	0	0	0	0	1	1	0
chr5	473144	473144	54	INS	2	HG01501_XX_EUR_IBS_duplicate5236,HG02312_XX_AMR_PEL_duplicate5322	chr5	470456	473382	ENSG00000066230.12	SLC9A3	17	17	8	6	5	7	34	9
chr5	70072861	70079171	-6310	DEL	1	HG04216_XX_SAS_ITU_duplicate5741	chr5	70076521	70076574	ENSG00000205571.15	SMN2	8	1	0	0	0	0	0	1
chr5	70072861	70079171	-6310	DEL	1	HG04216_XX_SAS_ITU_duplicate5741	chr5	70077019	70077595	ENSG00000205571.15	SMN2	9	1	0	0	0	0	0	1
chr7	26291922	26291922	54	INS	3	HG02345_XX_AMR_PEL_duplicate7617,HG02373_XY_EAS_CDX_duplicate7390,HG04216_XX_SAS_ITU_duplicate7663	chr7	26291862	26292086	ENSG00000086300.17	SNX10	1	1	0	0	0	0	0	1
chr14	64748163	64748261	-98	DEL	5	GM18871_XY_AFR_YRI_duplicate15498,GM18876_XX_AFR_YRI_duplicate15398,HG02817_XX_AFR_GWD_duplicate15149,HG03120_XY_AFR_ESN_duplicate15378,HG03548_XX_AFR_MSL_duplicate15218	chr14	64746283	64749473	ENSG00000070182.21	SPTB	36	1	0	0	0	0	0	1
chr17	42199227	42199279	-52	DEL	1	HG03548_XX_AFR_MSL_duplicate17001	chr17	42199177	42201864	ENSG00000173757.11	STAT5B	19	1	0	0	0	0	0	1
chr10	68827627	68827963	-336	DEL	43	GM18519_XY_AFR_YRI_duplicate12242,GM18876_XX_AFR_YRI_duplicate12084,GM18924_XX_AFR_YRI_duplicate11934,GM19312_XY_AFR_LWK_duplicate12050,GM19462_XX_AFR_LWK_duplicate12178,HG00110_XX_EUR_GBR_duplicate10154,HG00121_XX_EUR_GBR_duplicate10113,HG00136_XY_EUR_GBR_duplicate10314,HG00331_XX_EUR_FIN_duplicate10379,HG00473_XX_EAS_CHS_duplicate10376,HG00631_XY_EAS_CHS_duplicate10176,HG00705_XX_EAS_CHS_duplic…	chr10	68827531	68827933	ENSG00000165730.16	STOX1	1	4	0	0	0	0	3	1
chr1	109063275	109066965	-3690	DEL	1	HG00706_XY_EAS_CHS_duplicate1292	chr1	109064140	109064693	ENSG00000197780.11	TAF13	4	4	0	0	0	0	3	1
chr1	109063275	109066965	-3690	DEL	1	HG00706_XY_EAS_CHS_duplicate1292	chr1	109066135	109066232	ENSG00000197780.11	TAF13	3	4	0	0	0	0	3	1
chr6	32827726	32827903	-177	DEL	47	GM18856_XY_AFR_YRI_duplicate7365,GM19035_XY_AFR_LWK_duplicate7456,GM19471_XX_AFR_LWK_duplicate7422,HG00105_XY_EUR_GBR_duplicate6421,HG00110_XX_EUR_GBR_duplicate6362,HG00136_XY_EUR_GBR_duplicate6340,HG00151_XY_EUR_GBR_duplicate6344,HG00525_XX_EAS_CHS_duplicate6423,HG00599_XX_EAS_CHS_duplicate6319,HG00631_XY_EAS_CHS_duplicate6384,HG00705_XX_EAS_CHS_duplicate6423,HG00706_XY_EAS_CHS_duplicate6383,HG0…	chr6	32825415	32829034	ENSG00000204267.19	TAP2	12	4	0	0	0	0	3	1
chr6	13328502	13328502	78	INS	1	HG00121_XX_EUR_GBR_duplicate6203	chr6	13328296	13328537	ENSG00000145979.18	TBC1D7	1	4	0	0	0	0	3	1
chrX	106876050	106876107	-57	DEL	3	HG03864_XY_SAS_ITU_duplicate17675,HG03898_XX_SAS_STU_duplicate17758,HG04054_XX_SAS_ITU_duplicate17825	chrX	106873570	106876150	ENSG00000133138.20	TBC1D8B	21	4	0	0	0	0	3	1
chr1	152108471	152108705	-234	DEL	4	HG00705_XX_EAS_CHS_duplicate1344,HG00706_XY_EAS_CHS_duplicate1372,HG01797_XX_EAS_CDX_duplicate1478,HG02409_XY_EAS_CDX_duplicate1247	chr1	152106317	152113078	ENSG00000159450.13	TCHH	3	4	0	0	0	0	3	1
chr1	152109744	152109834	-90	DEL	6	GM19041_XY_AFR_LWK_duplicate1458,GM19471_XX_AFR_LWK_duplicate1383,HG00705_XX_EAS_CHS_duplicate1345,HG00706_XY_EAS_CHS_duplicate1373,HG01797_XX_EAS_CDX_duplicate1479,HG02409_XY_EAS_CDX_duplicate1248	chr1	152106317	152113078	ENSG00000159450.13	TCHH	3	4	0	0	0	0	3	1
chr1	152111929	152111983	-54	DEL	10	HG00151_XY_EUR_GBR_duplicate1257,HG00675_XX_EAS_CHS_duplicate1487,HG00705_XX_EAS_CHS_duplicate1346,HG01501_XX_EUR_IBS_duplicate1524,HG01695_XX_EUR_IBS_duplicate1547,HG02409_XY_EAS_CDX_duplicate1249,HG03069_XY_AFR_MSL_duplicate1649,HG03731_XX_SAS_ITU_duplicate1294,HG03861_XX_SAS_ITU_duplicate1255,HG03919_XX_SAS_BEB_duplicate1613	chr1	152106317	152113078	ENSG00000159450.13	TCHH	3	2	0	0	0	0	1	1
chr1	152111929	152111929	90	INS	30	GM18864_XX_AFR_YRI_duplicate1382,GM18865_XY_AFR_YRI_duplicate1451,GM18871_XY_AFR_YRI_duplicate1404,GM18924_XX_AFR_YRI_duplicate1560,GM19035_XY_AFR_LWK_duplicate1583,GM19308_XY_AFR_LWK_duplicate1401,HG00151_XY_EUR_GBR_duplicate1258,HG00525_XX_EAS_CHS_duplicate2,HG00728_XY_EAS_CHS_duplicate1748,HG01046_XX_EAS_CDX_duplicate1163,HG01312_XX_AMR_PUR_duplicate1453,HG01372_XX_AMR_CLM_duplicate1451,HG0169…	chr1	152106317	152113078	ENSG00000159450.13	TCHH	3	0	0	1	0	0	1	0
chr10	95647105	95677058	-29953	DEL	1	HG02817_XX_AFR_GWD_duplicate12060	chr10	95663401	95664300	ENSG00000119977.22	TCTN3	14	0	0	1	0	0	0	1
chr2	73985064	73985064	81	INS	1	HG00599_XX_EAS_CHS_duplicate2273	chr2	73984910	73985157	ENSG00000187605.16	TET3	1	0	0	1	0	0	0	1
chr3	133785445	133785495	-50	DEL	2	GM19041_XY_AFR_LWK_duplicate4394,GM19462_XX_AFR_LWK_duplicate4330	chr3	133778586	133796641	ENSG00000091513.16	TF	17	0	0	1	0	0	0	1
chr3	133785407	133785407	100	INS	6	HG01363_XX_AMR_CLM_duplicate3860,HG02252_XX_AMR_PEL_duplicate3885,HG02409_XY_EAS_CDX_duplicate3798,HG03774_XX_SAS_ITU_duplicate3764,HG03971_XY_SAS_ITU_duplicate3924,HG04054_XX_SAS_ITU_duplicate3964	chr3	133778586	133796641	ENSG00000091513.16	TF	17	0	0	1	0	0	0	1
chr3	133784922	133786238	-1316	DEL	51	GM18871_XY_AFR_YRI_duplicate4298,GM19462_XX_AFR_LWK_duplicate4329,HG00105_XY_EUR_GBR_duplicate3793,HG00110_XX_EUR_GBR_duplicate3847,HG00121_XX_EUR_GBR_duplicate3782,HG00136_XY_EUR_GBR_duplicate3773,HG00151_XY_EUR_GBR_duplicate3660,HG00473_XX_EAS_CHS_duplicate3759,HG00631_XY_EAS_CHS_duplicate3892,HG00706_XY_EAS_CHS_duplicate3829,HG00728_XY_EAS_CHS_duplicate4033,HG01046_XX_EAS_CDX_duplicate3635,HG0…	chr3	133778586	133796641	ENSG00000091513.16	TF	17	0	1	0	0	0	1	0
chr19	2994339	2997057	-2718	DEL	1	HG01369_XX_AMR_CLM_duplicate16482	chr19	2994900	2995179	ENSG00000104953.20	TLE6	17	0	1	0	0	0	1	0
chr17	78112132	78112132	148	INS	1	GM18871_XY_AFR_YRI_duplicate17623	chr17	78107397	78113211	ENSG00000141524.19	TMC6	20	0	1	0	0	0	1	0
chr17	78111931	78111931	109	INS	36	GM18519_XY_AFR_YRI_duplicate17798,GM18861_XX_AFR_YRI_duplicate17863,GM18864_XX_AFR_YRI_duplicate17394,GM18865_XY_AFR_YRI_duplicate17765,GM18876_XX_AFR_YRI_duplicate17618,GM18924_XX_AFR_YRI_duplicate17481,GM19035_XY_AFR_LWK_duplicate17540,GM19308_XY_AFR_LWK_duplicate17683,GM19462_XX_AFR_LWK_duplicate17787,GM19471_XX_AFR_LWK_duplicate17820,HG00525_XX_EAS_CHS_duplicate14898,HG01122_XX_AMR_CLM_duplic…	chr17	78107397	78113211	ENSG00000141524.19	TMC6	20	0	1	0	0	0	1	0
chr7	12242077	12242399	-322	DEL	88	GM18519_XY_AFR_YRI_duplicate8737,GM18856_XY_AFR_YRI_duplicate8614,GM18861_XX_AFR_YRI_duplicate8746,GM18864_XX_AFR_YRI_duplicate8497,GM18865_XY_AFR_YRI_duplicate8804,GM18871_XY_AFR_YRI_duplicate8594,GM18876_XX_AFR_YRI_duplicate8659,GM18924_XX_AFR_YRI_duplicate8546,GM19035_XY_AFR_LWK_duplicate8626,GM19041_XY_AFR_LWK_duplicate8776,GM19308_XY_AFR_LWK_duplicate8655,GM19312_XY_AFR_LWK_duplicate8625,GM1…	chr7	12231837	12243367	ENSG00000106460.20	TMEM106B	8	0	1	0	3	0	2	2
chr17	34638731	34638846	-115	DEL	1	HG03571_XY_AFR_MSL_duplicate16918	chr17	34637177	34639318	ENSG00000181291.8	TMEM132E	9	0	0	0	1	0	0	1
chr22	41922672	41922722	-50	DEL	1	HG03168_XX_AFR_ESN_duplicate20237	chr22	41922032	41925554	ENSG00000159958.7	TNFRSF13C	3	2	1	0	1	0	2	2
chr3	171061232	171061232	184	INS	1	HG01468_XX_AMR_CLM_duplicate4065	chr3	171058414	171063964	ENSG00000154310.17	TNIK	33	1	0	1	0	0	1	1
chr1	74362652	74370788	-8136	DEL	1	HG02502_XX_AFR_ACB_duplicate1647	chr1	74367256	74367342	ENSG00000116783.15	TNNI3K	12	0	0	4	0	0	2	2
chr1	74362652	74370788	-8136	DEL	1	HG02502_XX_AFR_ACB_duplicate1647	chr1	74367908	74367964	ENSG00000116783.15	TNNI3K	13	2	0	4	0	0	3	3
chr1	74362652	74370788	-8136	DEL	1	HG02502_XX_AFR_ACB_duplicate1647	chr1	74369022	74369114	ENSG00000116783.15	TNNI3K	14	1	0	0	0	0	1	0
chr1	74362652	74370788	-8136	DEL	1	HG02502_XX_AFR_ACB_duplicate1647	chr1	74369207	74369264	ENSG00000116783.15	TNNI3K	15	1	0	0	0	0	1	0
chr1	74362652	74370788	-8136	DEL	1	HG02502_XX_AFR_ACB_duplicate1647	chr1	74369391	74369585	ENSG00000116783.15	TNNI3K	16	1	0	0	0	0	1	0
chr1	74362652	74370788	-8136	DEL	1	HG02502_XX_AFR_ACB_duplicate1647	chr1	74370288	74370392	ENSG00000116783.15	TNNI3K	17	1	0	0	0	0	1	0
chr11	1929825	1929884	-59	DEL	8	GM18861_XX_AFR_YRI_duplicate12811,GM19312_XY_AFR_LWK_duplicate12618,HG03069_XY_AFR_MSL_duplicate12904,HG03646_XY_SAS_STU_duplicate10975,HG03668_XX_SAS_PJL_duplicate10936,HG03774_XX_SAS_ITU_duplicate11036,HG03868_XX_SAS_ITU_duplicate10714,HG04216_XX_SAS_ITU_duplicate11061	chr11	1929810	1929828	ENSG00000130595.20	TNNT3	8	1	0	0	0	0	1	0
chr6	32058155	32061494	-3339	DEL	6	GM18871_XY_AFR_YRI_duplicate7368,GM18876_XX_AFR_YRI_duplicate7424,HG02502_XX_AFR_ACB_duplicate7515,HG02614_XX_AFR_GWD_duplicate7507,HG02615_XX_AFR_GWD_duplicate7497,HG03168_XX_AFR_ESN_duplicate7531	chr6	32058058	32058390	ENSG00000168477.21	TNXB	22	1	0	0	0	0	1	0
chr6	32058155	32061494	-3339	DEL	6	GM18871_XY_AFR_YRI_duplicate7368,GM18876_XX_AFR_YRI_duplicate7424,HG02502_XX_AFR_ACB_duplicate7515,HG02614_XX_AFR_GWD_duplicate7507,HG02615_XX_AFR_GWD_duplicate7497,HG03168_XX_AFR_ESN_duplicate7531	chr6	32061397	32061720	ENSG00000168477.21	TNXB	21	1	0	0	0	0	1	0
chr11	35814836	35814836	6076	INS	1	HG04216_XX_SAS_ITU_duplicate11244	chr11	35806358	35818007	ENSG00000166326.7	TRIM44	5	6	0	0	0	0	2	4
chr22	37724034	37724328	-294	DEL	3	GM18519_XY_AFR_YRI_duplicate20505,GM18861_XX_AFR_YRI_duplicate20643,GM19035_XY_AFR_LWK_duplicate20227	chr22	37723185	37726503	ENSG00000100106.22	TRIOBP	7	5	0	1	0	0	3	3
chr22	37724496	37724568	-72	DEL	1	HG03631_XX_SAS_PJL_duplicate17624	chr22	37723185	37726503	ENSG00000100106.22	TRIOBP	7	1	0	1	0	0	2	0
chr22	37724034	37724034	291	INS	8	HG00473_XX_EAS_CHS_duplicate17685,HG00631_XY_EAS_CHS_duplicate17043,HG00705_XX_EAS_CHS_duplicate17416,HG01312_XX_AMR_PUR_duplicate18075,HG01468_XX_AMR_CLM_duplicate16554,HG03279_XX_AFR_ESN_duplicate19716,HG03631_XX_SAS_PJL_duplicate486,HG04063_XX_SAS_ITU_duplicate17436	chr22	37723185	37726503	ENSG00000100106.22	TRIOBP	7	1	0	1	0	0	2	0
chr22	37724034	37724034	291	INS	46	GM18865_XY_AFR_YRI_duplicate20547,GM18876_XX_AFR_YRI_duplicate20374,GM19471_XX_AFR_LWK_duplicate20728,HG00105_XY_EUR_GBR_duplicate17539,HG00110_XX_EUR_GBR_duplicate17130,HG00127_XX_EUR_GBR_duplicate15954,HG00136_XY_EUR_GBR_duplicate17361,HG00410_XX_EAS_CHS_duplicate17596,HG00525_XX_EAS_CHS_duplicate17121,HG00599_XX_EAS_CHS_duplicate17316,HG00675_XX_EAS_CHS_duplicate17083,HG00706_XY_EAS_CHS_duplic…	chr22	37723185	37726503	ENSG00000100106.22	TRIOBP	7	1	0	1	0	0	2	0
chr2	178653350	178657610	-4260	DEL	1	HG02373_XY_EAS_CDX_duplicate2717	chr2	178653427	178653507	ENSG00000155657.29	TTN	197	1	0	1	0	0	2	0
chr2	178653350	178657610	-4260	DEL	1	HG02373_XY_EAS_CDX_duplicate2717	chr2	178653621	178653701	ENSG00000155657.29	TTN	196	1	0	1	0	0	2	0
chr2	178653350	178657610	-4260	DEL	1	HG02373_XY_EAS_CDX_duplicate2717	chr2	178653817	178653897	ENSG00000155657.29	TTN	195	1	0	1	0	0	2	0
chr2	178653350	178657610	-4260	DEL	1	HG02373_XY_EAS_CDX_duplicate2717	chr2	178654012	178654095	ENSG00000155657.29	TTN	194	1	0	1	0	0	2	0
chr2	178653350	178657610	-4260	DEL	1	HG02373_XY_EAS_CDX_duplicate2717	chr2	178654208	178654291	ENSG00000155657.29	TTN	193	1	0	1	0	0	2	0
chr2	178653350	178657610	-4260	DEL	1	HG02373_XY_EAS_CDX_duplicate2717	chr2	178654445	178654534	ENSG00000155657.29	TTN	192	4	0	0	0	0	1	3
chr2	178653350	178657610	-4260	DEL	1	HG02373_XY_EAS_CDX_duplicate2717	chr2	178654745	178654828	ENSG00000155657.29	TTN	191	2	0	0	0	0	2	0
chr2	178653350	178657610	-4260	DEL	1	HG02373_XY_EAS_CDX_duplicate2717	chr2	178654912	178654995	ENSG00000155657.29	TTN	190	2	0	0	0	0	2	0
chr2	178653350	178657610	-4260	DEL	1	HG02373_XY_EAS_CDX_duplicate2717	chr2	178657498	178657581	ENSG00000155657.29	TTN	189	2	1	1	0	0	1	3
chr19	6494502	6494692	-190	DEL	1	GM19041_XY_AFR_LWK_duplicate18472	chr19	6494319	6496221	ENSG00000104833.12	TUBB4A	4	2	1	1	0	0	1	3
chr12	2939589	2939589	112	INS	85	GM18519_XY_AFR_YRI_duplicate13683,GM18856_XY_AFR_YRI_duplicate13550,GM18861_XX_AFR_YRI_duplicate13739,GM18864_XX_AFR_YRI_duplicate13395,GM18865_XY_AFR_YRI_duplicate13691,GM18871_XY_AFR_YRI_duplicate13595,GM18876_XX_AFR_YRI_duplicate13494,GM18924_XX_AFR_YRI_duplicate13433,GM19035_XY_AFR_LWK_duplicate13549,GM19041_XY_AFR_LWK_duplicate13699,GM19308_XY_AFR_LWK_duplicate13700,GM19312_XY_AFR_LWK_duplic…	chr12	2939311	2941138	ENSG00000078246.17	TULP3	11	2	1	1	0	0	1	3
chr5	134875179	134888188	-13009	DEL	1	HG00331_XX_EUR_FIN_duplicate6034	chr5	134887695	134888182	ENSG00000113621.15	TXNDC15	2	2	1	1	0	0	1	3
chr15	25336978	25336978	81	INS	1	HG02502_XX_AFR_ACB_duplicate15385	chr15	25333728	25339257	ENSG00000114062.22	UBE3A	13	2	1	1	0	0	1	3
chr1	215623190	215623190	342	INS	1	HG00728_XY_EAS_CHS_duplicate2004	chr1	215622891	215625870	ENSG00000042781.14	USH2A	72	2	1	1	0	0	1	3
chr1	215625170	215625227	-57	DEL	1	HG03643_XX_SAS_STU_duplicate1870	chr1	215622891	215625870	ENSG00000042781.14	USH2A	72	2	1	1	0	0	1	3
chr15	50501248	50504766	-3518	DEL	1	HG01797_XX_EAS_CDX_duplicate13300	chr15	50498903	50514421	ENSG00000138592.14	USP8	20	2	1	1	0	0	1	3
chr15	50509360	50509360	520	INS	1	HG02979_XX_AFR_ESN_duplicate16123	chr15	50498903	50514421	ENSG00000138592.14	USP8	20	2	0	0	0	0	1	1
chr16	69325359	69325427	-68	DEL	50	GM18519_XY_AFR_YRI_duplicate16941,GM18856_XY_AFR_YRI_duplicate16823,GM18864_XX_AFR_YRI_duplicate16544,GM18865_XY_AFR_YRI_duplicate16896,GM18876_XX_AFR_YRI_duplicate16735,GM18924_XX_AFR_YRI_duplicate16645,GM19035_XY_AFR_LWK_duplicate16743,GM19041_XY_AFR_LWK_duplicate16753,GM19308_XY_AFR_LWK_duplicate16935,GM19312_XY_AFR_LWK_duplicate16707,GM19473_XX_AFR_LWK_duplicate16779,HG00105_XY_EUR_GBR_duplic…	chr16	69324208	69326939	ENSG00000132612.16	VPS4A	11	5	0	0	0	0	4	1
chr17	510466	510466	133	INS	1	GM19462_XX_AFR_LWK_duplicate17197	chr17	508668	519298	ENSG00000141252.21	VPS53	22	2	0	0	0	0	2	0
chr17	513676	513906	-230	DEL	4	HG00110_XX_EUR_GBR_duplicate14402,HG00525_XX_EAS_CHS_duplicate14424,HG00675_XX_EAS_CHS_duplicate14348,HG00705_XX_EAS_CHS_duplicate14614	chr17	508668	519298	ENSG00000141252.21	VPS53	22	0	0	0	0	1	1	0
chr17	510299	510299	267	INS	11	HG00410_XX_EAS_CHS_duplicate14756,HG00631_XY_EAS_CHS_duplicate14339,HG01372_XX_AMR_CLM_duplicate14766,HG01395_XY_AMR_PUR_duplicate14908,HG01801_XX_EAS_CDX_duplicate14198,HG01812_XX_EAS_CDX_duplicate13981,HG02102_XX_AMR_PEL_duplicate14321,HG02252_XX_AMR_PEL_duplicate613,HG02262_XY_AMR_PEL_duplicate14480,HG02396_XY_EAS_CDX_duplicate14431,HG02409_XY_EAS_CDX_duplicate14704	chr17	508668	519298	ENSG00000141252.21	VPS53	22	1	0	0	0	2	3	0
chr17	513804	514356	-552	DEL	4	GM18865_XY_AFR_YRI_duplicate17170,GM19312_XY_AFR_LWK_duplicate17016,GM19462_XX_AFR_LWK_duplicate17198,HG02817_XX_AFR_GWD_duplicate16701	chr17	508668	519298	ENSG00000141252.21	VPS53	22	6	0	0	0	3	4	5
chr17	513904	514226	-322	DEL	3	HG02051_XY_AFR_ACB_duplicate16586,HG02974_XX_AFR_ESN_duplicate16718,HG03168_XX_AFR_ESN_duplicate16897	chr17	508668	519298	ENSG00000141252.21	VPS53	22	0	0	0	0	1	1	0
chr17	509416	509483	-67	DEL	3	HG01281_XX_AMR_CLM_duplicate14412,HG02102_XX_AMR_PEL_duplicate14320,HG03646_XY_SAS_STU_duplicate14688	chr17	508668	519298	ENSG00000141252.21	VPS53	22	1	0	3	3	3	7	3
chr17	510299	510299	868	INS	67	GM18519_XY_AFR_YRI_duplicate17234,GM18856_XY_AFR_YRI_duplicate17097,GM18861_XX_AFR_YRI_duplicate17331,GM18864_XX_AFR_YRI_duplicate16826,GM18865_XY_AFR_YRI_duplicate17169,GM18871_XY_AFR_YRI_duplicate17082,GM18876_XX_AFR_YRI_duplicate17019,GM18924_XX_AFR_YRI_duplicate529,GM19035_XY_AFR_LWK_duplicate17023,GM19041_XY_AFR_LWK_duplicate17030,GM19312_XY_AFR_LWK_duplicate17014,GM19462_XX_AFR_LWK_duplicat…	chr17	508668	519298	ENSG00000141252.21	VPS53	22	1	2	1	0	2	3	3
chr17	510318	510318	133	INS	9	GM18924_XX_AFR_YRI_duplicate16922,HG00525_XX_EAS_CHS_duplicate14423,HG00675_XX_EAS_CHS_duplicate14347,HG00705_XX_EAS_CHS_duplicate14613,HG01862_XX_EAS_KHV_duplicate14754,HG02051_XY_AFR_ACB_duplicate16584,HG02185_XX_EAS_CDX_duplicate14448,HG02974_XX_AFR_ESN_duplicate16716,GM18501_XY_AFR_YRI_duplicate17336	chr17	508668	519298	ENSG00000141252.21	VPS53	22	1	8	18	0	13	29	11
chr17	513630	513722	-92	DEL	51	GM18519_XY_AFR_YRI_duplicate17235,GM18856_XY_AFR_YRI_duplicate17098,GM18861_XX_AFR_YRI_duplicate17332,GM18864_XX_AFR_YRI_duplicate16827,GM18871_XY_AFR_YRI_duplicate17083,GM18876_XX_AFR_YRI_duplicate17020,GM19035_XY_AFR_LWK_duplicate17024,GM19312_XY_AFR_LWK_duplicate17015,GM19462_XX_AFR_LWK_duplicate17199,GM19471_XX_AFR_LWK_duplicate17255,GM19473_XX_AFR_LWK_duplicate17046,HG00105_XY_EUR_GBR_duplic…	chr17	508668	519298	ENSG00000141252.21	VPS53	22	0	5	10	1	8	19	5
chr15	53722870	53722870	270	INS	1	GM18864_XX_AFR_YRI_duplicate15780	chr15	53722802	53722908	ENSG00000166415.15	WDR72	3	0	8	15	0	11	26	8
chr15	53515032	53515032	78	INS	42	GM18865_XY_AFR_YRI_duplicate16132,GM19041_XY_AFR_LWK_duplicate15914,GM19308_XY_AFR_LWK_duplicate16168,GM19312_XY_AFR_LWK_duplicate15899,GM19462_XX_AFR_LWK_duplicate16150,HG00151_XY_EUR_GBR_duplicate13788,HG00331_XX_EUR_FIN_duplicate13750,HG00473_XX_EAS_CHS_duplicate13807,HG00599_XX_EAS_CHS_duplicate13618,HG00631_XY_EAS_CHS_duplicate13468,HG00705_XX_EAS_CHS_duplicate13697,HG00728_XY_EAS_CHS_duplic…	chr15	53513741	53517754	ENSG00000166415.15	WDR72	20	0	0	0	0	1	1	0
chr8	31174795	31174795	56	INS	3	GM18861_XX_AFR_YRI_duplicate10194,GM19308_XY_AFR_LWK_duplicate10104,HG00110_XX_EUR_GBR_duplicate8475	chr8	31172995	31176138	ENSG00000165392.11	WRN	35	0	0	0	0	1	1	0
chrX	123911195	123911329	-134	DEL	3	GM18924_XX_AFR_YRI_duplicate21102,HG02051_XY_AFR_ACB_duplicate20310,HG02979_XX_AFR_ESN_duplicate21346	chrX	123906988	123913972	ENSG00000101966.14	XIAP	7	22	14	20	9	21	62	24
chr1	180888413	180888413	321	INS	53	GM18519_XY_AFR_YRI_duplicate1578,GM18861_XX_AFR_YRI_duplicate1536,GM18864_XX_AFR_YRI_duplicate1523,GM18871_XY_AFR_YRI_duplicate1543,GM18876_XX_AFR_YRI_duplicate1567,GM19035_XY_AFR_LWK_duplicate1722,GM19041_XY_AFR_LWK_duplicate1592,GM19308_XY_AFR_LWK_duplicate1537,GM19312_XY_AFR_LWK_duplicate1546,GM19473_XX_AFR_LWK_duplicate1521,HG00110_XX_EUR_GBR_duplicate1579,HG00121_XX_EUR_GBR_duplicate1542,HG0…	chr1	180884006	180890279	ENSG00000143324.14	XPR1	15	15	4	1	2	12	24	10
chr16	17470921	17470921	243	INS	100	GM18519_XY_AFR_YRI_duplicate16694,GM18856_XY_AFR_YRI_duplicate16597,GM18861_XX_AFR_YRI_duplicate16826,GM18864_XX_AFR_YRI_duplicate16305,GM18865_XY_AFR_YRI_duplicate16672,GM18871_XY_AFR_YRI_duplicate16558,GM18876_XX_AFR_YRI_duplicate16497,GM18924_XX_AFR_YRI_duplicate16427,GM19035_XY_AFR_LWK_duplicate16540,GM19041_XY_AFR_LWK_duplicate16496,GM19308_XY_AFR_LWK_duplicate16714,GM19312_XY_AFR_LWK_duplic…	chr16	17470434	17470960	ENSG00000103489.12	XYLT1	1	17	2	7	2	2	20	10
chr16	72788584	72788647	-63	DEL	1	HG00631_XY_EAS_CHS_duplicate14109	chr16	72782885	72788848	ENSG00000140836.17	ZFHX3	10	16	7	7	9	14	36	17
chr10	79122190	79142481	-20291	DEL	1	HG01790_XX_EUR_GBR_duplicate10460	chr10	79139682	79139777	ENSG00000108175.19	ZMIZ1	3	14	4	3	2	4	20	7

## Sheet: Table S10
Table S10. Results from filtering known disease-associated SVs using SV calls from 1KGP. SV lengths may be rounded or approximate.
Number	Gene	SV type (type or length)	Beginning SV Count	SVs remaining after filtering	Remaining SVs in genic regions	Filtering Result	Mean Coverage (cramino)	N50 (cramino)
Targeted long-read sequencing
1	ALMS1	Insertion (Alu)a	N/A	N/A	N/A	Present
2	HPS1	Deletion (1.9 kbp)a	N/A	N/A	N/A	Present
3	AGL	Deletion (1.5 kbp)a	N/A	N/A	N/A	Present
4	HYDIN	Deletion (1.7 kbp)c	N/A	N/A	N/A	Present
5	HYDIN	Deletion (10 kbp)c	N/A	N/A	N/A	Present
6	Multiple	Duplication (2 Mbp)b	N/A	N/A	N/A	Present
7	TP53	Insertion (300 bp)c	N/A	N/A	N/A	Present
8	HPRT1	Inversion (17 Mbp)a	N/A	N/A	N/A	Present
Whole-genome long-read sequencing
1	NSD1	Insertion (110 bp)c	18422	1584	685	Present	6.15	13099
2	FGA	Deletion (4.1 kbp)c	22834	1999	269	Present	30.8	33146
3	FANCD2	Deletion (410 bp)c	22933	1503	327	Present	14.87	33949
4	ABCD1	Insertion (2.8 kbp)c	23216	1757	557	Present	19.01	10612
5	DBT	Deletion (3 kbp)c	23800	3194	1361	Present	24.76	7317
6	AGRN	Deletion (2.3 kbp)c	23346	419	171	Present	39.71	46894
7	COL5A1	Inversion (1.5 Mbp)c	24361	2038	417	Present	24.16	66720
8	AGL	Insertion (Alu)c	23033	820	259	Present	40.43	5773
Source: a Miller et al. 2021, b Wilderman et al. 2024, c unpublished.

[truncated: 3 more sheets: Table S11, Table S12, Table S13]
